# Supplementary material
Source: publisher figshare collection journal article supplement (https://gsajournals.figshare.com/ndownloader/files/13051274)
Supplement: Supplementary file 1 [file 13051274]

#	#	#	#	#	#	consensus_3	consensus_21	consensus_22	consensus_23	consensus_24	consensus_28	consensus_35	consensus_46	consensus_51	consensus_53	consensus_55	consensus_57	consensus_62	consensus_80	consensus_97	consensus_105	consensus_109	consensus_111	consensus_128	consensus_136	consensus_137	consensus_145	consensus_146	consensus_155	consensus_163	consensus_173	consensus_180	consensus_184	consensus_188	consensus_199	consensus_203	consensus_208	consensus_211	consensus_214	consensus_231	consensus_233	consensus_237	consensus_241	consensus_253	consensus_259	consensus_272	consensus_274	consensus_285	consensus_287	consensus_295	consensus_302	consensus_310	consensus_313	consensus_319	consensus_320	consensus_327	consensus_335	consensus_344	consensus_345	consensus_346	consensus_354	consensus_390	consensus_393	consensus_410	consensus_414	consensus_425	consensus_430	consensus_432	consensus_440	consensus_446	consensus_451	consensus_455	consensus_469	consensus_471	consensus_478	consensus_483	consensus_499	consensus_500	consensus_505	consensus_513	consensus_525	consensus_538	consensus_543	consensus_544	consensus_547	consensus_549	consensus_552	consensus_578	consensus_581	consensus_584	consensus_585	consensus_596	consensus_608	consensus_609	consensus_614	consensus_636	consensus_649	consensus_659	consensus_668	consensus_680	consensus_686	consensus_687	consensus_690	consensus_692	consensus_697	consensus_702	consensus_710	consensus_712	consensus_713	consensus_714	consensus_722	consensus_723	consensus_728	consensus_735	consensus_736	consensus_740	consensus_756	consensus_758	consensus_759	consensus_761	consensus_765	consensus_768	consensus_770	consensus_771	consensus_773	consensus_774	consensus_781	consensus_782	consensus_785	consensus_791	consensus_798	consensus_807	consensus_811	consensus_824	consensus_826	consensus_834	consensus_840	consensus_846	consensus_852	consensus_855	consensus_856	consensus_862	consensus_868	consensus_869	consensus_870	consensus_871	consensus_873	consensus_878	consensus_889	consensus_892	consensus_906	consensus_908	consensus_911	consensus_912	consensus_913	consensus_917	consensus_920	consensus_923	consensus_928	consensus_930	consensus_932	consensus_937	consensus_941	consensus_942	consensus_946	consensus_960	consensus_961	consensus_962	consensus_966	consensus_971	consensus_977	consensus_979	consensus_985	consensus_990	consensus_991	consensus_995	consensus_996	consensus_999	consensus_1010	consensus_1013	consensus_1017	consensus_1021	consensus_1034	consensus_1036	consensus_1044	consensus_1045	consensus_1048	consensus_1058	consensus_1059	consensus_1060	consensus_1073	consensus_1080	consensus_1091	consensus_1107	consensus_1108	consensus_1109	consensus_1118	consensus_1126	consensus_1134	consensus_1135	consensus_1143	consensus_1152	consensus_1160	consensus_1165	consensus_1168	consensus_1187	consensus_1199	consensus_1208	consensus_1209	consensus_1214	consensus_1219	consensus_1221	consensus_1227	consensus_1240	consensus_1241	consensus_1243	consensus_1246	consensus_1247	consensus_1254	consensus_1271	consensus_1279	consensus_1280	consensus_1284	consensus_1285	consensus_1292	consensus_1296	consensus_1304	consensus_1308	consensus_1320	consensus_1329	consensus_1370	consensus_1371	consensus_1372	consensus_1380	consensus_1389	consensus_1400	consensus_1402	consensus_1414	consensus_1428	consensus_1431	consensus_1440	consensus_1448	consensus_1451	consensus_1455	consensus_1465	consensus_1467	consensus_1476	consensus_1480	consensus_1481	consensus_1485	consensus_1492	consensus_1495	consensus_1503	consensus_1506	consensus_1527	consensus_1530	consensus_1536	consensus_1548	consensus_1551	consensus_1555	consensus_1557	consensus_1570	consensus_1572	consensus_1576	consensus_1587	consensus_1592	consensus_1599	consensus_1602	consensus_1610	consensus_1615	consensus_1628	consensus_1641	consensus_1663	consensus_1673	consensus_1675	consensus_1678	consensus_1688	consensus_1691	consensus_1692	consensus_1695	consensus_1698	consensus_1712	consensus_1718	consensus_1728	consensus_1731	consensus_1741	consensus_1744	consensus_1754	consensus_1757	consensus_1761	consensus_1769	consensus_1775	consensus_1777	consensus_1781	consensus_1785	consensus_1807	consensus_1818	consensus_1821	consensus_1827	consensus_1828	consensus_1829	consensus_1834	consensus_1843	consensus_1847	consensus_1848	consensus_1849	consensus_1857	consensus_1861	consensus_1862	consensus_1866	consensus_1869	consensus_1889	consensus_1906	consensus_1908	consensus_1911	consensus_1925	consensus_1926	consensus_1929	consensus_1933	consensus_1941	consensus_1942	consensus_1971	consensus_1972	consensus_2004	consensus_2007	consensus_2026	consensus_2027	consensus_2031	consensus_2038	consensus_2049	consensus_2070	consensus_2073	consensus_2074	consensus_2076	consensus_2078	consensus_2081	consensus_2090	consensus_2094	consensus_2100	consensus_2109	consensus_2113	consensus_2116	consensus_2120	consensus_2125	consensus_2127	consensus_2134	consensus_2135	consensus_2143	consensus_2146	consensus_2191	consensus_2195	consensus_2199	consensus_2200	consensus_2201	consensus_2210	consensus_2218	consensus_2220	consensus_2225	consensus_2226	consensus_2227	consensus_2237	consensus_2243	consensus_2272	consensus_2273	consensus_2298	consensus_2299	consensus_2306	consensus_2316	consensus_2329	consensus_2332	consensus_2333	consensus_2334	consensus_2341	consensus_2347	consensus_2353	consensus_2357	consensus_2358	consensus_2362	consensus_2371	consensus_2377	consensus_2383	consensus_2397	consensus_2400	consensus_2411	consensus_2417	consensus_2430	consensus_2434	consensus_2435	consensus_2439	consensus_2455	consensus_2462	consensus_2473	consensus_2477	consensus_2481	consensus_2483	consensus_2484	consensus_2501	consensus_2513	consensus_2514	consensus_2517	consensus_2542	consensus_2549	consensus_2550	consensus_2559	consensus_2562	consensus_2570	consensus_2575	consensus_2579	consensus_2596	consensus_2599	consensus_2603	consensus_2610	consensus_2620	consensus_2640	consensus_2649	consensus_2654	consensus_2655	consensus_2662	consensus_2671	consensus_2673	consensus_2674	consensus_2691	consensus_2700	consensus_2705	consensus_2709	consensus_2711	consensus_2714	consensus_2715	consensus_2718	consensus_2738	consensus_2740	consensus_2747	consensus_2755	consensus_2761	consensus_2766	consensus_2769	consensus_2770	consensus_2774	consensus_2775	consensus_2784	consensus_2785	consensus_2791	consensus_2802	consensus_2806	consensus_2818	consensus_2825	consensus_2836	consensus_2853	consensus_2854	consensus_2864	consensus_2866	consensus_2870	consensus_2875	consensus_2882	consensus_2888	consensus_2894	consensus_2895	consensus_2896	consensus_2903	consensus_2908	consensus_2918	consensus_2923	consensus_2925	consensus_2934	consensus_2935	consensus_2940	consensus_2942	consensus_2947	consensus_2949	consensus_2951	consensus_2960	consensus_2966	consensus_2967	consensus_2981	consensus_2989	consensus_2994	consensus_2995	consensus_3020	consensus_3023	consensus_3033	consensus_3034	consensus_3039	consensus_3043	consensus_3047	consensus_3049	consensus_3050	consensus_3058	consensus_3060	consensus_3063	consensus_3070	consensus_3073	consensus_3076	consensus_3078	consensus_3085	consensus_3088	consensus_3097	consensus_3105	consensus_3112	consensus_3115	consensus_3119	consensus_3124	consensus_3142	consensus_3148	consensus_3150	consensus_3151	consensus_3161	consensus_3164	consensus_3165	consensus_3170	consensus_3178	consensus_3188	consensus_3192	consensus_3197	consensus_3201	consensus_3204	consensus_3210	consensus_3213	consensus_3217	consensus_3218	consensus_3222	consensus_3223	consensus_3240	consensus_3247	consensus_3251	consensus_3258	consensus_3259	consensus_3263	consensus_3264	consensus_3275	consensus_3276	consensus_3277	consensus_3283	consensus_3284	consensus_3290	consensus_3292	consensus_3295	consensus_3298	consensus_3301	consensus_3302	consensus_3306	consensus_3310	consensus_3332	consensus_3340	consensus_3342	consensus_3353	consensus_3355	consensus_3382	consensus_3391	consensus_3393	consensus_3394	consensus_3398	consensus_3408	consensus_3416	consensus_3421	consensus_3424	consensus_3440	consensus_3448	consensus_3450	consensus_3454	consensus_3464	consensus_3480	consensus_3488	consensus_3491	consensus_3498	consensus_3507	consensus_3510	consensus_3517	consensus_3528	consensus_3530	consensus_3531	consensus_3541	consensus_3543	consensus_3556	consensus_3558	consensus_3568	consensus_3584	consensus_3611	consensus_3613	consensus_3616	consensus_3617	consensus_3625	consensus_3631	consensus_3634	consensus_3645	consensus_3658	consensus_3662	consensus_3663	consensus_3669	consensus_3680	consensus_3682	consensus_3689	consensus_3695	consensus_3696	consensus_3699	consensus_3704	consensus_3706	consensus_3715	consensus_3718	consensus_3728	consensus_3731	consensus_3747	consensus_3749	consensus_3757	consensus_3787	consensus_3799	consensus_3802	consensus_3803	consensus_3817	consensus_3828	consensus_3831	consensus_3833	consensus_3834	consensus_3836	consensus_3839	consensus_3859	consensus_3869	consensus_3876	consensus_3877	consensus_3887	consensus_3898	consensus_3909	consensus_3912	consensus_3913	consensus_3922	consensus_3929	consensus_3946	consensus_3955	consensus_3957	consensus_3958	consensus_3961	consensus_3967	consensus_3968	consensus_3970	consensus_3972	consensus_3976	consensus_3977	consensus_3980	consensus_3982	consensus_3983	consensus_3984	consensus_3987	consensus_3990	consensus_3991	consensus_3999	consensus_4007	consensus_4013	consensus_4018	consensus_4035	consensus_4056	consensus_4073	consensus_4076	consensus_4079	consensus_4090	consensus_4096	consensus_4105	consensus_4110	consensus_4123	consensus_4133	consensus_4145	consensus_4146	consensus_4150	consensus_4178	consensus_4183	consensus_4192	consensus_4195	consensus_4206	consensus_4212	consensus_4214	consensus_4215	consensus_4229	consensus_4232	consensus_4233	consensus_4259	consensus_4260	consensus_4265	consensus_4274	consensus_4283	consensus_4290	consensus_4296	consensus_4297	consensus_4304	consensus_4320	consensus_4327	consensus_4330	consensus_4338	consensus_4340	consensus_4343	consensus_4354	consensus_4357	consensus_4358	consensus_4368	consensus_4380	consensus_4383	consensus_4388	consensus_4401	consensus_4403	consensus_4404	consensus_4418	consensus_4424	consensus_4426	consensus_4431	consensus_4432	consensus_4437	consensus_4441	consensus_4448	consensus_4452	consensus_4455	consensus_4457	consensus_4468	consensus_4481	consensus_4483	consensus_4486	consensus_4487	consensus_4492	consensus_4493	consensus_4502	consensus_4504	consensus_4516	consensus_4520	consensus_4534	consensus_4536	consensus_4540	consensus_4541	consensus_4550	consensus_4557	consensus_4558	consensus_4562	consensus_4564	consensus_4566	consensus_4574	consensus_4577	consensus_4594	consensus_4595	consensus_4600	consensus_4607	consensus_4621	consensus_4632	consensus_4635	consensus_4651	consensus_4654	consensus_4659	consensus_4665	consensus_4666	consensus_4684	consensus_4687	consensus_4695	consensus_4698	consensus_4728	consensus_4739	consensus_4752	consensus_4754	consensus_4768	consensus_4771	consensus_4783	consensus_4784	consensus_4792	consensus_4796	consensus_4797	consensus_4810	consensus_4812	consensus_4815	consensus_4819	consensus_4825	consensus_4837	consensus_4839	consensus_4860	consensus_4861	consensus_4864	consensus_4865	consensus_4881	consensus_4882	consensus_4898	consensus_4900	consensus_4903	consensus_4905	consensus_4924	consensus_4933	consensus_4934	consensus_4935	consensus_4949	consensus_4950	consensus_4951	consensus_4958	consensus_4966	consensus_4972	consensus_4981	consensus_4989	consensus_4991	consensus_5009	consensus_5010	consensus_5013	consensus_5016	consensus_5027	consensus_5030	consensus_5031	consensus_5035	consensus_5044	consensus_5046	consensus_5053	consensus_5071	consensus_5083	consensus_5087	consensus_5092	consensus_5097	consensus_5121	consensus_5132	consensus_5145	consensus_5147	consensus_5149	consensus_5166	consensus_5168	consensus_5176	consensus_5185	consensus_5187	consensus_5189	consensus_5190	consensus_5198	consensus_5202	consensus_5206	consensus_5212	consensus_5224	consensus_5227	consensus_5236	consensus_5246	consensus_5249	consensus_5250	consensus_5255	consensus_5260	consensus_5268	consensus_5278	consensus_5292	consensus_5303	consensus_5308	consensus_5312	consensus_5325	consensus_5332	consensus_5336	consensus_5341	consensus_5356	consensus_5359	consensus_5364	consensus_5369	consensus_5374	consensus_5375	consensus_5378	consensus_5379	consensus_5381	consensus_5384	consensus_5389	consensus_5416	consensus_5417	consensus_5418	consensus_5421	consensus_5429	consensus_5430	consensus_5435	consensus_5441	consensus_5444	consensus_5457	consensus_5475	consensus_5476	consensus_5480	consensus_5484	consensus_5488	consensus_5490	consensus_5525	consensus_5529	consensus_5530	consensus_5544	consensus_5552	consensus_5557	consensus_5562	consensus_5571	consensus_5588	consensus_5590	consensus_5596	consensus_5598	consensus_5600	consensus_5601	consensus_5603	consensus_5605	consensus_5612	consensus_5616	consensus_5633	consensus_5640	consensus_5641	consensus_5651	consensus_5660	consensus_5661	consensus_5679	consensus_5681	consensus_5685	consensus_5693	consensus_5703	consensus_5706	consensus_5723	consensus_5727	consensus_5755	consensus_5757	consensus_5761	consensus_5768	consensus_5771	consensus_5777	consensus_5784	consensus_5795	consensus_5797	consensus_5804	consensus_5829	consensus_5831	consensus_5839	consensus_5840	consensus_5841	consensus_5855	consensus_5860	consensus_5862	consensus_5889	consensus_5891	consensus_5893	consensus_5896	consensus_5921	consensus_5929	consensus_5930	consensus_5945	consensus_5946	consensus_5950	consensus_5959	consensus_5965	consensus_5984	consensus_5998	consensus_5999	consensus_6002	consensus_6020	consensus_6039	consensus_6041	consensus_6042	consensus_6044	consensus_6062	consensus_6066	consensus_6073	consensus_6074	consensus_6078	consensus_6090	consensus_6106	consensus_6110	consensus_6112	consensus_6116	consensus_6118	consensus_6125	consensus_6138	consensus_6153	consensus_6165	consensus_6166	consensus_6167	consensus_6175	consensus_6181	consensus_6183	consensus_6186	consensus_6193	consensus_6195	consensus_6199	consensus_6200	consensus_6209	consensus_6212	consensus_6213	consensus_6217	consensus_6218	consensus_6224	consensus_6245	consensus_6250	consensus_6255	consensus_6261	consensus_6267	consensus_6270	consensus_6279	consensus_6286	consensus_6288	consensus_6296	consensus_6301	consensus_6306	consensus_6313	consensus_6322	consensus_6327	consensus_6334	consensus_6338	consensus_6370	consensus_6371	consensus_6372	consensus_6375	consensus_6376	consensus_6381	consensus_6387	consensus_6402	consensus_6404	consensus_6414	consensus_6418	consensus_6426	consensus_6427	consensus_6428	consensus_6431	consensus_6444	consensus_6447	consensus_6455	consensus_6458	consensus_6468	consensus_6475	consensus_6478	consensus_6487	consensus_6488	consensus_6496	consensus_6503	consensus_6514	consensus_6517	consensus_6519	consensus_6528	consensus_6535	consensus_6539	consensus_6542	consensus_6575	consensus_6576	consensus_6585	consensus_6589	consensus_6591	consensus_6601	consensus_6603	consensus_6610	consensus_6616	consensus_6619	consensus_6628	consensus_6631	consensus_6634	consensus_6636	consensus_6644	consensus_6659	consensus_6666	consensus_6675	consensus_6676	consensus_6681	consensus_6685	consensus_6694	consensus_6700	consensus_6704	consensus_6705	consensus_6709	consensus_6712	consensus_6714	consensus_6721	consensus_6723	consensus_6725	consensus_6730	consensus_6735	consensus_6742	consensus_6743	consensus_6751	consensus_6753	consensus_6765	consensus_6766	consensus_6767	consensus_6771	consensus_6780	consensus_6787	consensus_6803	consensus_6805	consensus_6807	consensus_6811	consensus_6819	consensus_6822	consensus_6830	consensus_6831	consensus_6833	consensus_6840	consensus_6841	consensus_6842	consensus_6843	consensus_6852	consensus_6856	consensus_6858	consensus_6859	consensus_6864	consensus_6865	consensus_6893	consensus_6897	consensus_6901	consensus_6904	consensus_6908	consensus_6913	consensus_6914	consensus_6920	consensus_6922	consensus_6924	consensus_6926	consensus_6930	consensus_6934	consensus_6937	consensus_6938	consensus_6952	consensus_6958	consensus_6963	consensus_6964	consensus_6986	consensus_6994	consensus_7009	consensus_7010	consensus_7013	consensus_7039	consensus_7044	consensus_7051	consensus_7053	consensus_7056	consensus_7063	consensus_7067	consensus_7072	consensus_7081	consensus_7112	consensus_7118	consensus_7124	consensus_7126	consensus_7127	consensus_7129	consensus_7132	consensus_7151	consensus_7153	consensus_7155	consensus_7158	consensus_7160	consensus_7168	consensus_7170	consensus_7172	consensus_7173	consensus_7174	consensus_7177	consensus_7179	consensus_7194	consensus_7214	consensus_7221	consensus_7227	consensus_7229	consensus_7232	consensus_7234	consensus_7236	consensus_7240	consensus_7244	consensus_7248	consensus_7256	consensus_7262	consensus_7264	consensus_7265	consensus_7270	consensus_7276	consensus_7279	consensus_7280	consensus_7288	consensus_7290	consensus_7293	consensus_7297	consensus_7310	consensus_7315	consensus_7320	consensus_7321	consensus_7328	consensus_7332	consensus_7338	consensus_7342	consensus_7359	consensus_7362	consensus_7363	consensus_7375	consensus_7378	consensus_7385	consensus_7388	consensus_7399	consensus_7403	consensus_7413	consensus_7440	consensus_7442	consensus_7444	consensus_7446	consensus_7448	consensus_7450	consensus_7453	consensus_7456	consensus_7463	consensus_7465	consensus_7466	consensus_7475	consensus_7479	consensus_7485	consensus_7492	consensus_7495	consensus_7499	consensus_7501	consensus_7502	consensus_7506	consensus_7510	consensus_7516	consensus_7530	consensus_7532	consensus_7539	consensus_7541	consensus_7548	consensus_7550	consensus_7553	consensus_7569	consensus_7572	consensus_7579	consensus_7582	consensus_7586	consensus_7590	consensus_7591	consensus_7601	consensus_7606	consensus_7619	consensus_7623	consensus_7633	consensus_7634	consensus_7635	consensus_7638	consensus_7647	consensus_7659	consensus_7670	consensus_7673	consensus_7687	consensus_7696	consensus_7698	consensus_7707	consensus_7709	consensus_7714	consensus_7716	consensus_7736	consensus_7740	consensus_7748	consensus_7754	consensus_7766	consensus_7772	consensus_7773	consensus_7776	consensus_7787	consensus_7790	consensus_7797	consensus_7798	consensus_7800	consensus_7807	consensus_7808	consensus_7817	consensus_7818	consensus_7822	consensus_7823	consensus_7850	consensus_7853	consensus_7872	consensus_7875	consensus_7879	consensus_7882	consensus_7885	consensus_7886	consensus_7908	consensus_7913	consensus_7916	consensus_7925	consensus_7929	consensus_7932	consensus_7933	consensus_7935	consensus_7943	consensus_7944	consensus_7951	consensus_7959	consensus_7967	consensus_7972	consensus_7978	consensus_7980	consensus_7996	consensus_8003	consensus_8007	consensus_8014	consensus_8015	consensus_8018	consensus_8021	consensus_8025	consensus_8029	consensus_8038	consensus_8041	consensus_8051	consensus_8058	consensus_8059	consensus_8061	consensus_8068	consensus_8087	consensus_8090	consensus_8091	consensus_8097	consensus_8098	consensus_8106	consensus_8111	consensus_8115	consensus_8117	consensus_8124	consensus_8144	consensus_8157	consensus_8161	consensus_8178	consensus_8183	consensus_8191	consensus_8203	consensus_8214	consensus_8220	consensus_8221	consensus_8227	consensus_8246	consensus_8247	consensus_8256	consensus_8262	consensus_8269	consensus_8270	consensus_8272	consensus_8278	consensus_8279	consensus_8312	consensus_8314	consensus_8315	consensus_8316	consensus_8317	consensus_8319	consensus_8323	consensus_8337	consensus_8346	consensus_8384	consensus_8385	consensus_8388	consensus_8389	consensus_8399	consensus_8402	consensus_8403	consensus_8411	consensus_8413	consensus_8418	consensus_8427	consensus_8428	consensus_8429	consensus_8430	consensus_8436	consensus_8443	consensus_8467	consensus_8471	consensus_8478	consensus_8480	consensus_8483	consensus_8485	consensus_8486	consensus_8494	consensus_8496	consensus_8498	consensus_8499	consensus_8524	consensus_8530	consensus_8539	consensus_8541	consensus_8545	consensus_8558	consensus_8560	consensus_8576	consensus_8585	consensus_8586	consensus_8596	consensus_8620	consensus_8621	consensus_8622	consensus_8627	consensus_8632	consensus_8638	consensus_8640	consensus_8641	consensus_8652	consensus_8655	consensus_8663	consensus_8677	consensus_8680	consensus_8683	consensus_8686	consensus_8695	consensus_8715	consensus_8723	consensus_8736	consensus_8741	consensus_8745	consensus_8754	consensus_8759	consensus_8760	consensus_8766	consensus_8768	consensus_8769	consensus_8775	consensus_8784	consensus_8789	consensus_8809	consensus_8820	consensus_8828	consensus_8834	consensus_8851	consensus_8859	consensus_8874	consensus_8876	consensus_8880	consensus_8896	consensus_8905	consensus_8906	consensus_8909	consensus_8927	consensus_8930	consensus_8932	consensus_8935	consensus_8938	consensus_8946	consensus_8958	consensus_8966	consensus_8974	consensus_8978	consensus_8983	consensus_8988	consensus_8989	consensus_9011	consensus_9025	consensus_9056	consensus_9057	consensus_9058	consensus_9059	consensus_9065	consensus_9073	consensus_9090	consensus_9092	consensus_9101	consensus_9108	consensus_9109	consensus_9116	consensus_9137	consensus_9138	consensus_9145	consensus_9154	consensus_9156	consensus_9159	consensus_9161	consensus_9165	consensus_9168	consensus_9183	consensus_9193	consensus_9200	consensus_9205	consensus_9212	consensus_9223	consensus_9226	consensus_9227	consensus_9230	consensus_9231	consensus_9233	consensus_9234	consensus_9241	consensus_9246	consensus_9252	consensus_9259	consensus_9260	consensus_9278	consensus_9281	consensus_9292	consensus_9297	consensus_9304	consensus_9312	consensus_9329	consensus_9333	consensus_9335	consensus_9339	consensus_9346	consensus_9350	consensus_9354	consensus_9362	consensus_9363	consensus_9365	consensus_9370	consensus_9371	consensus_9375	consensus_9404	consensus_9407	consensus_9408	consensus_9414	consensus_9422	consensus_9429	consensus_9436	consensus_9437	consensus_9439	consensus_9445	consensus_9452	consensus_9463	consensus_9466	consensus_9467	consensus_9469	consensus_9471	consensus_9473	consensus_9476	consensus_9496	consensus_9517	consensus_9519	consensus_9521	consensus_9523	consensus_9537	consensus_9540	consensus_9543	consensus_9544	consensus_9564	consensus_9569	consensus_9571	consensus_9580	consensus_9583	consensus_9586	consensus_9592	consensus_9593	consensus_9603	consensus_9624	consensus_9649	consensus_9650	consensus_9666	consensus_9673	consensus_9674	consensus_9681	consensus_9682	consensus_9684	consensus_9696	consensus_9709	consensus_9726	consensus_9730	consensus_9738	consensus_9756	consensus_9763	consensus_9782	consensus_9789	consensus_9792	consensus_9799	consensus_9800	consensus_9804	consensus_9812	consensus_9820	consensus_9831	consensus_9835	consensus_9841	consensus_9847	consensus_9862	consensus_9863	consensus_9873	consensus_9875	consensus_9878	consensus_9883	consensus_9890	consensus_9908	consensus_9911	consensus_9919	consensus_9920	consensus_9924	consensus_9938	consensus_9942	consensus_9946	consensus_9960	consensus_9968	consensus_9979	consensus_9990	consensus_9992	consensus_10008	consensus_10013	consensus_10024	consensus_10050	consensus_10066	consensus_10067	consensus_10068	consensus_10073	consensus_10075	consensus_10083	consensus_10086	consensus_10120	consensus_10144	consensus_10145	consensus_10150	consensus_10153	consensus_10157	consensus_10158	consensus_10165	consensus_10167	consensus_10176	consensus_10190	consensus_10195	consensus_10196	consensus_10223	consensus_10231	consensus_10232	consensus_10234	consensus_10239	consensus_10240	consensus_10241	consensus_10244	consensus_10247	consensus_10250	consensus_10256	consensus_10263	consensus_10269	consensus_10281	consensus_10293	consensus_10298	consensus_10304	consensus_10314	consensus_10329	consensus_10333	consensus_10348	consensus_10353	consensus_10355	consensus_10356	consensus_10359	consensus_10361	consensus_10366	consensus_10369	consensus_10374	consensus_10375	consensus_10384	consensus_10390	consensus_10392	consensus_10425	consensus_10427	consensus_10433	consensus_10443	consensus_10451	consensus_10453	consensus_10460	consensus_10468	consensus_10469	consensus_10474	consensus_10477	consensus_10480	consensus_10484	consensus_10493	consensus_10495	consensus_10512	consensus_10522	consensus_10525	consensus_10527	consensus_10530	consensus_10531	consensus_10538	consensus_10545	consensus_10549	consensus_10552	consensus_10554	consensus_10558	consensus_10559	consensus_10562	consensus_10578	consensus_10601	consensus_10604	consensus_10612	consensus_10613	consensus_10614	consensus_10622	consensus_10628	consensus_10639	consensus_10642	consensus_10644	consensus_10647	consensus_10649	consensus_10660	consensus_10662	consensus_10672	consensus_10675	consensus_10677	consensus_10688	consensus_10695	consensus_10697	consensus_10707	consensus_10716	consensus_10717	consensus_10723	consensus_10731	consensus_10740	consensus_10744	consensus_10751	consensus_10765	consensus_10784	consensus_10786	consensus_10788	consensus_10795	consensus_10796	consensus_10799	consensus_10809	consensus_10814	consensus_10823	consensus_10830	consensus_10831	consensus_10833	consensus_10834	consensus_10839	consensus_10841	consensus_10844	consensus_10849	consensus_10866	consensus_10873	consensus_10884	consensus_10891	consensus_10894	consensus_10935	consensus_10941	consensus_10945	consensus_10952	consensus_10954	consensus_10960	consensus_10974	consensus_10979	consensus_10990	consensus_11002	consensus_11023	consensus_11027	consensus_11048	consensus_11053	consensus_11058	consensus_11062	consensus_11068	consensus_11069	consensus_11075	consensus_11077	consensus_11083	consensus_11091	consensus_11096	consensus_11100	consensus_11102	consensus_11106	consensus_11110	consensus_11121	consensus_11122	consensus_11129	consensus_11140	consensus_11143	consensus_11150	consensus_11167	consensus_11173	consensus_11185	consensus_11189	consensus_11196	consensus_11207	consensus_11213	consensus_11214	consensus_11217	consensus_11228	consensus_11243	consensus_11264	consensus_11269	consensus_11272	consensus_11277	consensus_11282	consensus_11287	consensus_11290	consensus_11296	consensus_11299	consensus_11303	consensus_11307	consensus_11314	consensus_11319	consensus_11329	consensus_11342	consensus_11352	consensus_11367	consensus_11370	consensus_11403	consensus_11405	consensus_11408	consensus_11414	consensus_11423	consensus_11434	consensus_11436	consensus_11440	consensus_11456	consensus_11476	consensus_11477	consensus_11490	consensus_11497	consensus_11504	consensus_11533	consensus_11543	consensus_11548	consensus_11549	consensus_11554	consensus_11556	consensus_11559	consensus_11560	consensus_11562	consensus_11563	consensus_11564	consensus_11587	consensus_11605	consensus_11608	consensus_11611	consensus_11624	consensus_11626	consensus_11631	consensus_11637	consensus_11654	consensus_11661	consensus_11683	consensus_11684	consensus_11689	consensus_11698	consensus_11715	consensus_11731	consensus_11742	consensus_11744	consensus_11753	consensus_11760	consensus_11762	consensus_11772	consensus_11773	consensus_11782	consensus_11791	consensus_11805	consensus_11809	consensus_11813	consensus_11842	consensus_11847	consensus_11849	consensus_11850	consensus_11857	consensus_11858	consensus_11860	consensus_11867	consensus_11868	consensus_11869	consensus_11890	consensus_11892	consensus_11896	consensus_11899	consensus_11905	consensus_11906	consensus_11912	consensus_11936	consensus_11939	consensus_11955	consensus_11956	consensus_11957	consensus_11962	consensus_11968	consensus_11994	consensus_11997	consensus_12003	consensus_12013	consensus_12020	consensus_12021	consensus_12029	consensus_12034	consensus_12054	consensus_12060	consensus_12062	consensus_12066	consensus_12067	consensus_12068	consensus_12070	consensus_12073	consensus_12076	consensus_12079	consensus_12080	consensus_12086	consensus_12092	consensus_12111	consensus_12115	consensus_12122	consensus_12124	consensus_12126	consensus_12137	consensus_12152	consensus_12158	consensus_12161	consensus_12167	consensus_12195	consensus_12203	consensus_12207	consensus_12216	consensus_12217	consensus_12218	consensus_12248	consensus_12258	consensus_12259	consensus_12261	consensus_12267	consensus_12272	consensus_12279	consensus_12282	consensus_12283	consensus_12303	consensus_12308	consensus_12309	consensus_12322	consensus_12323	consensus_12324	consensus_12341	consensus_12348	consensus_12371	consensus_12374	consensus_12383	consensus_12387	consensus_12397	consensus_12401	consensus_12420	consensus_12435	consensus_12447	consensus_12454	consensus_12465	consensus_12470	consensus_12476	consensus_12497	consensus_12505	consensus_12514	consensus_12521	consensus_12522	consensus_12528	consensus_12533	consensus_12536	consensus_12538	consensus_12543	consensus_12544	consensus_12552	consensus_12581	consensus_12591	consensus_12614	consensus_12621	consensus_12623	consensus_12644	consensus_12646	consensus_12657	consensus_12666	consensus_12677	consensus_12687	consensus_12689	consensus_12691	consensus_12701	consensus_12710	consensus_12723	consensus_12728	consensus_12729	consensus_12741	consensus_12742	consensus_12743	consensus_12759	consensus_12762	consensus_12771	consensus_12776	consensus_12818	consensus_12831	consensus_12835	consensus_12839	consensus_12846	consensus_12848	consensus_12849	consensus_12857	consensus_12866	consensus_12868	consensus_12871	consensus_12874	consensus_12876	consensus_12888	consensus_12900	consensus_12905	consensus_12907	consensus_12926	consensus_12952	consensus_12961	consensus_12963	consensus_12964	consensus_12969	consensus_12974	consensus_12988	consensus_12994	consensus_13010	consensus_13013	consensus_13018	consensus_13033	consensus_13041	consensus_13043	consensus_13052	consensus_13054	consensus_13059	consensus_13063	consensus_13068	consensus_13081	consensus_13085	consensus_13089	consensus_13093	consensus_13103	consensus_13117	consensus_13121	consensus_13131	consensus_13134	consensus_13144	consensus_13164	consensus_13179	consensus_13192	consensus_13193	consensus_13204	consensus_13206	consensus_13211	consensus_13228	consensus_13232	consensus_13241	consensus_13242	consensus_13248	consensus_13249	consensus_13251	consensus_13253	consensus_13262	consensus_13268	consensus_13274	consensus_13298	consensus_13309	consensus_13317	consensus_13342	consensus_13364	consensus_13368	consensus_13374	consensus_13380	consensus_13384	consensus_13388	consensus_13390	consensus_13403	consensus_13409	consensus_13415	consensus_13426	consensus_13439	consensus_13440	consensus_13445	consensus_13456	consensus_13458	consensus_13459	consensus_13460	consensus_13468	consensus_13477	consensus_13488	consensus_13491	consensus_13503	consensus_13506	consensus_13513	consensus_13520	consensus_13526	consensus_13532	consensus_13533	consensus_13548	consensus_13555	consensus_13567	consensus_13577	consensus_13582	consensus_13587	consensus_13606	consensus_13608	consensus_13615	consensus_13620	consensus_13625	consensus_13631	consensus_13633	consensus_13634	consensus_13637	consensus_13651	consensus_13666	consensus_13671	consensus_13681	consensus_13688	consensus_13690	consensus_13697	consensus_13699	consensus_13702	consensus_13705	consensus_13712	consensus_13716	consensus_13729	consensus_13731	consensus_13741	consensus_13748	consensus_13757	consensus_13767	consensus_13779	consensus_13790	consensus_13806	consensus_13814	consensus_13818	consensus_13825	consensus_13836	consensus_13838	consensus_13840	consensus_13864	consensus_13870	consensus_13874	consensus_13876	consensus_13880	consensus_13881	consensus_13895	consensus_13900	consensus_13904	consensus_13934	consensus_13935	consensus_13942	consensus_13946	consensus_13952	consensus_13954	consensus_13955	consensus_13959	consensus_13963	consensus_13975	consensus_13985	consensus_13997	consensus_14004	consensus_14011	consensus_14013	consensus_14014	consensus_14015	consensus_14025	consensus_14029	consensus_14035	consensus_14038	consensus_14042	consensus_14043	consensus_14049	consensus_14051	consensus_14054	consensus_14072	consensus_14078	consensus_14083	consensus_14085	consensus_14087	consensus_14089	consensus_14092	consensus_14094	consensus_14105	consensus_14117	consensus_14121	consensus_14122	consensus_14126	consensus_14133	consensus_14138	consensus_14156	consensus_14160	consensus_14165	consensus_14173	consensus_14179	consensus_14212	consensus_14222	consensus_14230	consensus_14234	consensus_14235	consensus_14245	consensus_14249	consensus_14252	consensus_14266	consensus_14279	consensus_14284	consensus_14295	consensus_14298	consensus_14299	consensus_14312	consensus_14321	consensus_14322	consensus_14329	consensus_14333	consensus_14339	consensus_14359	consensus_14368	consensus_14374	consensus_14381	consensus_14398	consensus_14417	consensus_14425	consensus_14426	consensus_14447	consensus_14448	consensus_14459	consensus_14464	consensus_14493	consensus_14495	consensus_14496	consensus_14505	consensus_14521	consensus_14524	consensus_14533	consensus_14556	consensus_14576	consensus_14587	consensus_14616	consensus_14617	consensus_14640	consensus_14644	consensus_14650	consensus_14652	consensus_14654	consensus_14668	consensus_14679	consensus_14683	consensus_14693	consensus_14694	consensus_14702	consensus_14704	consensus_14705	consensus_14709	consensus_14737	consensus_14745	consensus_14750	consensus_14753	consensus_14758	consensus_14763	consensus_14765	consensus_14767	consensus_14772	consensus_14781	consensus_14787	consensus_14802	consensus_14814	consensus_14841	consensus_14848	consensus_14850	consensus_14864	consensus_14876	consensus_14883	consensus_14889	consensus_14898	consensus_14906	consensus_14919	consensus_14920	consensus_14927	consensus_14932	consensus_14935	consensus_14956	consensus_14969	consensus_14981	consensus_14990	consensus_14996	consensus_15007	consensus_15012	consensus_15018	consensus_15020	consensus_15052	consensus_15054	consensus_15064	consensus_15073	consensus_15076	consensus_15096	consensus_15119	consensus_15120	consensus_15124	consensus_15145	consensus_15147	consensus_15174	consensus_15176	consensus_15195	consensus_15196	consensus_15205	consensus_15207	consensus_15215	consensus_15217	consensus_15221	consensus_15224	consensus_15227	consensus_15234	consensus_15247	consensus_15248	consensus_15268	consensus_15274	consensus_15283	consensus_15285	consensus_15301	consensus_15309	consensus_15320	consensus_15325	consensus_15334	consensus_15343	consensus_15354	consensus_15367	consensus_15377	consensus_15388	consensus_15393	consensus_15396	consensus_15399	consensus_15410	consensus_15415	consensus_15418	consensus_15420	consensus_15427	consensus_15435	consensus_15436	consensus_15456	consensus_15465	consensus_15468	consensus_15470	consensus_15474	consensus_15478	consensus_15480	consensus_15482	consensus_15485	consensus_15489	consensus_15493	consensus_15497	consensus_15510	consensus_15512	consensus_15527	consensus_15530	consensus_15533	consensus_15543	consensus_15546	consensus_15571	consensus_15590	consensus_15595	consensus_15602	consensus_15605	consensus_15610	consensus_15618	consensus_15623	consensus_15632	consensus_15654	consensus_15662	consensus_15676	consensus_15679	consensus_15688	consensus_15690	consensus_15692	consensus_15707	consensus_15708	consensus_15712	consensus_15735	consensus_15745	consensus_15763	consensus_15769	consensus_15786	consensus_15788	consensus_15793	consensus_15796	consensus_15812	consensus_15821	consensus_15825	consensus_15829	consensus_15832	consensus_15839	consensus_15843	consensus_15848	consensus_15861	consensus_15871	consensus_15893	consensus_15896	consensus_15901	consensus_15902	consensus_15904	consensus_15910	consensus_15911	consensus_15919	consensus_15921	consensus_15929	consensus_15956	consensus_15961	consensus_15965	consensus_15984	consensus_15989	consensus_16009	consensus_16010	consensus_16017	consensus_16019	consensus_16021	consensus_16026	consensus_16035	consensus_16042	consensus_16048	consensus_16051	consensus_16053	consensus_16062	consensus_16069	consensus_16082	consensus_16083	consensus_16086	consensus_16102	consensus_16114	consensus_16127	consensus_16133	consensus_16134	consensus_16150	consensus_16152	consensus_16161	consensus_16163	consensus_16167	consensus_16169	consensus_16198	consensus_16200	consensus_16206	consensus_16235	consensus_16243	consensus_16244	consensus_16246	consensus_16250	consensus_16262	consensus_16264	consensus_16267	consensus_16273	consensus_16303	consensus_16304	consensus_16308	consensus_16323	consensus_16343	consensus_16378	consensus_16381	consensus_16382	consensus_16398	consensus_16404	consensus_16422	consensus_16425	consensus_16426	consensus_16430	consensus_16437	consensus_16442	consensus_16448	consensus_16473	consensus_16507	consensus_16517	consensus_16529	consensus_16536	consensus_16545	consensus_16554	consensus_16567	consensus_16572	consensus_16577	consensus_16580	consensus_16586	consensus_16598	consensus_16602	consensus_16603	consensus_16619	consensus_16622	consensus_16631	consensus_16643	consensus_16646	consensus_16654	consensus_16686	consensus_16700	consensus_16708	consensus_16718	consensus_16719	consensus_16724	consensus_16725	consensus_16733	consensus_16736	consensus_16749	consensus_16752	consensus_16754	consensus_16756	consensus_16762	consensus_16769	consensus_16777	consensus_16790	consensus_16799	consensus_16801	consensus_16804	consensus_16814	consensus_16831	consensus_16840	consensus_16846	consensus_16851	consensus_16858	consensus_16866	consensus_16876	consensus_16878	consensus_16879	consensus_16889	consensus_16894	consensus_16898	consensus_16907	consensus_16909	consensus_16918	consensus_16923	consensus_16932	consensus_16942	consensus_16949	consensus_16953	consensus_16954	consensus_16962	consensus_17001	consensus_17008	consensus_17026	consensus_17030	consensus_17031	consensus_17037	consensus_17038	consensus_17040	consensus_17042	consensus_17047	consensus_17054	consensus_17057	consensus_17060	consensus_17069	consensus_17070	consensus_17071	consensus_17079	consensus_17093	consensus_17106	consensus_17110	consensus_17111	consensus_17126	consensus_17138	consensus_17139	consensus_17154	consensus_17155	consensus_17159	consensus_17181	consensus_17208	consensus_17209	consensus_17216	consensus_17222	consensus_17224	consensus_17226	consensus_17232	consensus_17248	consensus_17255	consensus_17258	consensus_17259	consensus_17262	consensus_17267	consensus_17268	consensus_17276	consensus_17284	consensus_17296	consensus_17306	consensus_17316	consensus_17330	consensus_17332	consensus_17334	consensus_17349	consensus_17371	consensus_17379	consensus_17384	consensus_17393	consensus_17396	consensus_17397	consensus_17404	consensus_17405	consensus_17414	consensus_17416	consensus_17418	consensus_17421	consensus_17432	consensus_17434	consensus_17440	consensus_17442	consensus_17459	consensus_17470	consensus_17473	consensus_17475	consensus_17483	consensus_17510	consensus_17533	consensus_17535	consensus_17561	consensus_17565	consensus_17567	consensus_17575	consensus_17587	consensus_17589	consensus_17602	consensus_17609	consensus_17614	consensus_17617	consensus_17629	consensus_17638	consensus_17647	consensus_17655	consensus_17656	consensus_17660	consensus_17669	consensus_17674	consensus_17682	consensus_17689	consensus_17705	consensus_17708	consensus_17710	consensus_17715	consensus_17727	consensus_17729	consensus_17731	consensus_17740	consensus_17750	consensus_17755	consensus_17756	consensus_17789	consensus_17814	consensus_17818	consensus_17824	consensus_17829	consensus_17840	consensus_17846	consensus_17865	consensus_17867	consensus_17869	consensus_17877	consensus_17892	consensus_17906	consensus_17911	consensus_17918	consensus_17924	consensus_17926	consensus_17927	consensus_17948	consensus_17954	consensus_17970	consensus_17977	consensus_17979	consensus_17986	consensus_17991	consensus_17993	consensus_18004	consensus_18015	consensus_18018	consensus_18019	consensus_18029	consensus_18045	consensus_18057	consensus_18062	consensus_18065	consensus_18073	consensus_18083	consensus_18096	consensus_18100	consensus_18106	consensus_18124	consensus_18136	consensus_18143	consensus_18144	consensus_18154	consensus_18178	consensus_18227	consensus_18238	consensus_18254	consensus_18256	consensus_18267	consensus_18273	consensus_18283	consensus_18298	consensus_18316	consensus_18322	consensus_18352	consensus_18353	consensus_18370	consensus_18373	consensus_18374	consensus_18375	consensus_18376	consensus_18380	consensus_18382	consensus_18403	consensus_18415	consensus_18417	consensus_18426	consensus_18446	consensus_18450	consensus_18466	consensus_18470	consensus_18475	consensus_18494	consensus_18495	consensus_18496	consensus_18499	consensus_18504	consensus_18509	consensus_18519	consensus_18524	consensus_18536	consensus_18559	consensus_18565	consensus_18575	consensus_18577	consensus_18579	consensus_18588	consensus_18589	consensus_18591	consensus_18599	consensus_18604	consensus_18608	consensus_18611	consensus_18618	consensus_18636	consensus_18643	consensus_18645	consensus_18646	consensus_18659	consensus_18661	consensus_18664	consensus_18668	consensus_18672	consensus_18676	consensus_18708	consensus_18710	consensus_18713	consensus_18716	consensus_18718	consensus_18730	consensus_18735	consensus_18740	consensus_18745	consensus_18749	consensus_18754	consensus_18756	consensus_18765	consensus_18788	consensus_18791	consensus_18800	consensus_18813	consensus_18814	consensus_18819	consensus_18823	consensus_18832	consensus_18833	consensus_18854	consensus_18867	consensus_18869	consensus_18877	consensus_18881	consensus_18886	consensus_18887	consensus_18891	consensus_18895	consensus_18897	consensus_18907	consensus_18922	consensus_18923	consensus_18928	consensus_18947	consensus_18949	consensus_18979	consensus_18995	consensus_18998	consensus_19002	consensus_19013	consensus_19024	consensus_19040	consensus_19043	consensus_19071	consensus_19094	consensus_19100	consensus_19106	consensus_19109	consensus_19112	consensus_19114	consensus_19127	consensus_19128	consensus_19153	consensus_19161	consensus_19165	consensus_19168	consensus_19175	consensus_19179	consensus_19186	consensus_19189	consensus_19199	consensus_19209	consensus_19212	consensus_19214	consensus_19232	consensus_19236	consensus_19238	consensus_19241	consensus_19243	consensus_19244	consensus_19248	consensus_19253	consensus_19263	consensus_19271	consensus_19274	consensus_19282	consensus_19288	consensus_19291	consensus_19302	consensus_19316	consensus_19323	consensus_19330	consensus_19339	consensus_19340	consensus_19343	consensus_19356	consensus_19364	consensus_19381	consensus_19392	consensus_19399	consensus_19402	consensus_19409	consensus_19410	consensus_19412	consensus_19417	consensus_19418	consensus_19430	consensus_19432	consensus_19442	consensus_19446	consensus_19449	consensus_19451	consensus_19452	consensus_19462	consensus_19466	consensus_19470	consensus_19473	consensus_19478	consensus_19480	consensus_19485	consensus_19490	consensus_19492	consensus_19494	consensus_19501	consensus_19504	consensus_19547	consensus_19553	consensus_19564	consensus_19574	consensus_19582	consensus_19588	consensus_19591	consensus_19596	consensus_19605	consensus_19622	consensus_19630	consensus_19631	consensus_19640	consensus_19646	consensus_19647	consensus_19651	consensus_19671	consensus_19672	consensus_19682	consensus_19687	consensus_19693	consensus_19701	consensus_19718	consensus_19732	consensus_19739	consensus_19741	consensus_19758	consensus_19767	consensus_19776	consensus_19780	consensus_19791	consensus_19799	consensus_19808	consensus_19832	consensus_19837	consensus_19847	consensus_19848	consensus_19849	consensus_19861	consensus_19867	consensus_19869	consensus_19878	consensus_19899	consensus_19909	consensus_19911	consensus_19922	consensus_19928	consensus_19933	consensus_19951	consensus_19979	consensus_19989	consensus_19994	consensus_19995	consensus_19998	consensus_20009	consensus_20011	consensus_20016	consensus_20035	consensus_20037	consensus_20039	consensus_20041	consensus_20051	consensus_20059	consensus_20062	consensus_20083	consensus_20093	consensus_20094	consensus_20102	consensus_20112	consensus_20124	consensus_20129	consensus_20133	consensus_20141	consensus_20151	consensus_20162	consensus_20163	consensus_20165	consensus_20172	consensus_20187	consensus_20189	consensus_20196	consensus_20197	consensus_20201	consensus_20214	consensus_20227	consensus_20230	consensus_20233	consensus_20236	consensus_20241	consensus_20245	consensus_20253	consensus_20261	consensus_20270	consensus_20283	consensus_20287	consensus_20290	consensus_20293	consensus_20296	consensus_20300	consensus_20302	consensus_20308	consensus_20316	consensus_20333	consensus_20337	consensus_20346	consensus_20353	consensus_20362	consensus_20389	consensus_20392	consensus_20398	consensus_20415	consensus_20425	consensus_20427	consensus_20428	consensus_20455	consensus_20463	consensus_20488	consensus_20508	consensus_20510	consensus_20518	consensus_20522	consensus_20550	consensus_20553	consensus_20563	consensus_20569	consensus_20574	consensus_20586	consensus_20590	consensus_20594	consensus_20599	consensus_20605	consensus_20623	consensus_20624	consensus_20625	consensus_20635	consensus_20639	consensus_20642	consensus_20645	consensus_20652	consensus_20656	consensus_20668	consensus_20680	consensus_20683	consensus_20691	consensus_20711	consensus_20713	consensus_20727	consensus_20742	consensus_20751	consensus_20756	consensus_20771	consensus_20788	consensus_20797	consensus_20802	consensus_20834	consensus_20839	consensus_20859	consensus_20860	consensus_20862	consensus_20884	consensus_20892	consensus_20893	consensus_20894	consensus_20898	consensus_20901	consensus_20902	consensus_20906	consensus_20927	consensus_20933	consensus_20934	consensus_20951	consensus_20963	consensus_20968	consensus_20985	consensus_20999	consensus_21020	consensus_21029	consensus_21033	consensus_21049	consensus_21052	consensus_21057	consensus_21060	consensus_21071	consensus_21073	consensus_21074	consensus_21077	consensus_21081	consensus_21100	consensus_21108	consensus_21118	consensus_21119	consensus_21123	consensus_21127	consensus_21129	consensus_21131	consensus_21134	consensus_21139	consensus_21144	consensus_21164	consensus_21173	consensus_21205	consensus_21230	consensus_21233	consensus_21240	consensus_21248	consensus_21256	consensus_21282	consensus_21289	consensus_21331	consensus_21342	consensus_21358	consensus_21360	consensus_21362	consensus_21365	consensus_21369	consensus_21382	consensus_21383	consensus_21402	consensus_21407	consensus_21411	consensus_21435	consensus_21443	consensus_21446	consensus_21449	consensus_21453	consensus_21454	consensus_21472	consensus_21496	consensus_21503	consensus_21509	consensus_21510	consensus_21514	consensus_21520	consensus_21537	consensus_21587	consensus_21592	consensus_21600	consensus_21618	consensus_21624	consensus_21625	consensus_21634	consensus_21635	consensus_21636	consensus_21655	consensus_21661	consensus_21671	consensus_21676	consensus_21693	consensus_21697	consensus_21698	consensus_21702	consensus_21706	consensus_21716	consensus_21722	consensus_21726	consensus_21729	consensus_21738	consensus_21741	consensus_21753	consensus_21755	consensus_21784	consensus_21785	consensus_21797	consensus_21801	consensus_21809	consensus_21811	consensus_21814	consensus_21818	consensus_21820	consensus_21822	consensus_21829	consensus_21832	consensus_21862	consensus_21871	consensus_21890	consensus_21894	consensus_21925	consensus_21930	consensus_21958	consensus_21960	consensus_21962	consensus_21971	consensus_21973	consensus_21985	consensus_22012	consensus_22015	consensus_22023	consensus_22027	consensus_22028	consensus_22047	consensus_22074	consensus_22090	consensus_22092	consensus_22093	consensus_22099	consensus_22100	consensus_22101	consensus_22102	consensus_22108	consensus_22111	consensus_22113	consensus_22121	consensus_22122	consensus_22123	consensus_22139	consensus_22140	consensus_22142	consensus_22160	consensus_22162	consensus_22164	consensus_22165	consensus_22169	consensus_22178	consensus_22182	consensus_22189	consensus_22213	consensus_22218	consensus_22224	consensus_22239	consensus_22253	consensus_22261	consensus_22283	consensus_22285	consensus_22286	consensus_22295	consensus_22299	consensus_22312	consensus_22314	consensus_22328	consensus_22342	consensus_22346	consensus_22347	consensus_22352	consensus_22356	consensus_22376	consensus_22391	consensus_22392	consensus_22405	consensus_22428	consensus_22438	consensus_22452	consensus_22473	consensus_22474	consensus_22480	consensus_22481	consensus_22487	consensus_22511	consensus_22515	consensus_22547	consensus_22569	consensus_22570	consensus_22571	consensus_22573	consensus_22590	consensus_22601	consensus_22606	consensus_22607	consensus_22622	consensus_22623	consensus_22643	consensus_22649	consensus_22653	consensus_22676	consensus_22680	consensus_22686	consensus_22700	consensus_22705	consensus_22731	consensus_22746	consensus_22751	consensus_22761	consensus_22770	consensus_22796	consensus_22804	consensus_22805	consensus_22813	consensus_22818	consensus_22821	consensus_22824	consensus_22831	consensus_22841	consensus_22844	consensus_22850	consensus_22877	consensus_22893	consensus_22904	consensus_22908	consensus_22916	consensus_22922	consensus_22926	consensus_22929	consensus_22933	consensus_22941	consensus_22944	consensus_22950	consensus_22952	consensus_22954	consensus_22957	consensus_22961	consensus_22976	consensus_22982	consensus_22992	consensus_22997	consensus_22998	consensus_23005	consensus_23013	consensus_23015	consensus_23021	consensus_23031	consensus_23046	consensus_23065	consensus_23071	consensus_23094	consensus_23115	consensus_23128	consensus_23141	consensus_23143	consensus_23144	consensus_23145	consensus_23153	consensus_23155	consensus_23160	consensus_23168	consensus_23169	consensus_23185	consensus_23199	consensus_23204	consensus_23208	consensus_23211	consensus_23222	consensus_23229	consensus_23247	consensus_23258	consensus_23269	consensus_23273	consensus_23281	consensus_23297	consensus_23302	consensus_23304	consensus_23312	consensus_23316	consensus_23319	consensus_23323	consensus_23375	consensus_23397	consensus_23403	consensus_23408	consensus_23411	consensus_23417	consensus_23423	consensus_23433	consensus_23434	consensus_23435	consensus_23443	consensus_23448	consensus_23457	consensus_23466	consensus_23469	consensus_23473	consensus_23489	consensus_23494	consensus_23510	consensus_23517	consensus_23535	consensus_23544	consensus_23565	consensus_23567	consensus_23575	consensus_23582	consensus_23583	consensus_23585	consensus_23593	consensus_23614	consensus_23616	consensus_23622	consensus_23630	consensus_23639	consensus_23661	consensus_23663	consensus_23672	consensus_23674	consensus_23675	consensus_23676	consensus_23682	consensus_23684	consensus_23686	consensus_23688	consensus_23692	consensus_23700	consensus_23718	consensus_23752	consensus_23773	consensus_23776	consensus_23777	consensus_23811	consensus_23816	consensus_23818	consensus_23823	consensus_23850	consensus_23853	consensus_23862	consensus_23866	consensus_23875	consensus_23881	consensus_23882	consensus_23891	consensus_23913	consensus_23925	consensus_23926	consensus_23944	consensus_23948	consensus_23950	consensus_23962	consensus_23968	consensus_23972	consensus_23980	consensus_23997	consensus_24000	consensus_24005	consensus_24012	consensus_24038	consensus_24040	consensus_24055	consensus_24063	consensus_24067	consensus_24084	consensus_24087	consensus_24097	consensus_24125	consensus_24135	consensus_24144	consensus_24156	consensus_24157	consensus_24175	consensus_24177	consensus_24182	consensus_24194	consensus_24206	consensus_24214	consensus_24221	consensus_24224	consensus_24232	consensus_24238	consensus_24245	consensus_24263	consensus_24267	consensus_24275	consensus_24286	consensus_24295	consensus_24307	consensus_24311	consensus_24326	consensus_24361	consensus_24381	consensus_24387	consensus_24395	consensus_24396	consensus_24397	consensus_24400	consensus_24409	consensus_24427	consensus_24431	consensus_24435	consensus_24445	consensus_24467	consensus_24473	consensus_24475	consensus_24476	consensus_24484	consensus_24524	consensus_24536	consensus_24539	consensus_24553	consensus_24556	consensus_24557	consensus_24558	consensus_24576	consensus_24597	consensus_24598	consensus_24620	consensus_24635	consensus_24641	consensus_24644	consensus_24660	consensus_24674	consensus_24685	consensus_24695	consensus_24720	consensus_24732	consensus_24746	consensus_24756	consensus_24758	consensus_24770	consensus_24771	consensus_24802	consensus_24811	consensus_24823	consensus_24833	consensus_24841	consensus_24864	consensus_24868	consensus_24892	consensus_24896	consensus_24902	consensus_24905	consensus_24907	consensus_24909	consensus_24934	consensus_24941	consensus_24950	consensus_24951	consensus_24954	consensus_24957	consensus_24962	consensus_24980	consensus_24988	consensus_24996	consensus_25001	consensus_25008	consensus_25029	consensus_25055	consensus_25057	consensus_25063	consensus_25068	consensus_25070	consensus_25078	consensus_25086	consensus_25089	consensus_25090	consensus_25093	consensus_25100	consensus_25104	consensus_25147	consensus_25148	consensus_25161	consensus_25180	consensus_25213	consensus_25221	consensus_25223	consensus_25233	consensus_25235	consensus_25236	consensus_25241	consensus_25243	consensus_25282	consensus_25297	consensus_25298	consensus_25313	consensus_25339	consensus_25368	consensus_25374	consensus_25382	consensus_25390	consensus_25395	consensus_25402	consensus_25408	consensus_25411	consensus_25422	consensus_25424	consensus_25425	consensus_25431	consensus_25450	consensus_25458	consensus_25460	consensus_25470	consensus_25476	consensus_25478	consensus_25495	consensus_25515	consensus_25525	consensus_25529	consensus_25543	consensus_25727	consensus_25729	consensus_25730	consensus_25737	consensus_25741	consensus_25743	consensus_25748	consensus_25752	consensus_25754	consensus_25760	consensus_25764	consensus_25784	consensus_25785	consensus_25794	consensus_25800	consensus_25801	consensus_25802	consensus_25803	consensus_25804	consensus_25805	consensus_25810	consensus_25811	consensus_25831	consensus_25832	consensus_25835	consensus_25841	consensus_25846	consensus_25857	consensus_25861	consensus_25870	consensus_25873	consensus_25874	consensus_25875	consensus_25886	consensus_25889	consensus_25890	consensus_25893	consensus_25898	consensus_25904	consensus_25911	consensus_25917	consensus_25928	consensus_25929	consensus_25939	consensus_25942	consensus_25965	consensus_25971	consensus_25974	consensus_25980	consensus_25989	consensus_25990	consensus_25995	consensus_25998	consensus_26011	consensus_26017	consensus_26029	consensus_26032	consensus_26035	consensus_26036	consensus_26041	consensus_26047	consensus_26051	consensus_26059	consensus_26064	consensus_26069	consensus_26071	consensus_26072	consensus_26073	consensus_26078	consensus_26080	consensus_26082	consensus_26083	consensus_26084	consensus_26089	consensus_26095	consensus_26099	consensus_26100	consensus_26105	consensus_26112	consensus_26136	consensus_26137	consensus_26139	consensus_26140	consensus_26141	consensus_26147	consensus_26151	consensus_26155	consensus_26168	consensus_26171	consensus_26174	consensus_26175	consensus_26176	consensus_26185	consensus_26191	consensus_26193	consensus_26198	consensus_26203	consensus_26205	consensus_26208	consensus_26210	consensus_26211	consensus_26212	consensus_26213	consensus_26231	consensus_26232	consensus_26233	consensus_26239	consensus_26259	consensus_26268	consensus_26270	consensus_26274	consensus_26276	consensus_26306	consensus_26308	consensus_26310	consensus_26315	consensus_26322	consensus_26326	consensus_26330	consensus_26335	consensus_26342	consensus_26345	consensus_26354	consensus_26361	consensus_26365	consensus_26376	consensus_26380	consensus_26381	consensus_26384	consensus_26385	consensus_26389	consensus_26408	consensus_26424	consensus_26427	consensus_26430	consensus_26431	consensus_26433	consensus_26436	consensus_26437	consensus_26440	consensus_26442	consensus_26452	consensus_26455	consensus_26476	consensus_26484	consensus_26485	consensus_26495	consensus_26502	consensus_26503	consensus_26509	consensus_26510	consensus_26520	consensus_26532	consensus_26538	consensus_26540	consensus_26549	consensus_26557	consensus_26558	consensus_26559	consensus_26572	consensus_26574	consensus_26588	consensus_26591	consensus_26595	consensus_26600	consensus_26602	consensus_26604	consensus_26612	consensus_26613	consensus_26617	consensus_26621	consensus_26623	consensus_26628	consensus_26631	consensus_26632	consensus_26635	consensus_26643	consensus_26646	consensus_26651	consensus_26652	consensus_26653	consensus_26655	consensus_26666	consensus_26672	consensus_26674	consensus_26686	consensus_26692	consensus_26693	consensus_26695	consensus_26697	consensus_26701	consensus_26703	consensus_26706	consensus_26708	consensus_26712	consensus_26720	consensus_26721	consensus_26733	consensus_26734	consensus_26737	consensus_26740	consensus_26744	consensus_26761	consensus_26764	consensus_26768	consensus_26777	consensus_26778	consensus_26780	consensus_26781	consensus_26783	consensus_26784	consensus_26788	consensus_26792	consensus_26793	consensus_26809	consensus_26810	consensus_26816	consensus_26820	consensus_26825	consensus_26836	consensus_26837	consensus_26862	consensus_26867	consensus_26883	consensus_26885	consensus_26886	consensus_26888	consensus_26889	consensus_26890	consensus_26893	consensus_26901	consensus_26905	consensus_26908	consensus_26913	consensus_26923	consensus_26924	consensus_26927	consensus_26930	consensus_26940	consensus_26941	consensus_26942	consensus_26948	consensus_26951	consensus_26984	consensus_26995	consensus_26996	consensus_26998	consensus_26999	consensus_27004	consensus_27007	consensus_27011	consensus_27019	consensus_27020	consensus_27024	consensus_27030	consensus_27033	consensus_27034	consensus_27037	consensus_27040	consensus_27046	consensus_27048	consensus_27052	consensus_27058	consensus_27076	consensus_27077	consensus_27095	consensus_27097	consensus_27099	consensus_27100	consensus_27105	consensus_27106	consensus_27111	consensus_27112	consensus_27134	consensus_27139	consensus_27144	consensus_27146	consensus_27147	consensus_27154	consensus_27155	consensus_27160	consensus_27164	consensus_27180	consensus_27182	consensus_27184	consensus_27194	consensus_27199	consensus_27204	consensus_27214	consensus_27215	consensus_27228	consensus_27233	consensus_27237	consensus_27238	consensus_27240	consensus_27241	consensus_27247	consensus_27248	consensus_27255	consensus_27260	consensus_27261	consensus_27267	consensus_27270	consensus_27272	consensus_27273	consensus_27274	consensus_27277	consensus_27287	consensus_27296	consensus_27303	consensus_27304	consensus_27305	consensus_27310	consensus_27323	consensus_27324	consensus_27326	consensus_27336	consensus_27342	consensus_27348	consensus_27351	consensus_27354	consensus_27357	consensus_27359	consensus_27363	consensus_27364	consensus_27366	consensus_27370	consensus_27381	consensus_27382	consensus_27386	consensus_27389	consensus_27400	consensus_27401	consensus_27402	consensus_27418	consensus_27423	consensus_27432	consensus_27445	consensus_27449	consensus_27453	consensus_27461	consensus_27467	consensus_27470	consensus_27480	consensus_27481	consensus_27485	consensus_27487	consensus_27488	consensus_27491	consensus_27501	consensus_27505	consensus_27506	consensus_27507	consensus_27513	consensus_27516	consensus_27517	consensus_27518	consensus_27519	consensus_27520	consensus_27522	consensus_27524	consensus_27543	consensus_27547	consensus_27552	consensus_27553	consensus_27555	consensus_27558	consensus_27560	consensus_27568	consensus_27580	consensus_27581	consensus_27584	consensus_27586	consensus_27587	consensus_27593	consensus_27605	consensus_27630	consensus_27634	consensus_27635	consensus_27640	consensus_27643	consensus_27645	consensus_27648	consensus_27650	consensus_27651	consensus_27653	consensus_27655	consensus_27667	consensus_27676	consensus_27677	consensus_27689	consensus_27697	consensus_27703	consensus_27717	consensus_27721	consensus_27725	consensus_27726	consensus_27728	consensus_27731	consensus_27732	consensus_27741	consensus_27742	consensus_27743	consensus_27744	consensus_27753	consensus_27755	consensus_27763	consensus_27790	consensus_27796	consensus_27798	consensus_27811	consensus_27814	consensus_27817	consensus_27828	consensus_27829	consensus_27833	consensus_27834	consensus_27846	consensus_27847	consensus_27853	consensus_27859	consensus_27866	consensus_27869	consensus_27872	consensus_27876	consensus_27900	consensus_27903	consensus_27907	consensus_27919	consensus_27926	consensus_27927	consensus_27930	consensus_27935	consensus_27937	consensus_27941	consensus_27949	consensus_27955	consensus_27957	consensus_27963	consensus_27965	consensus_27966	consensus_27969	consensus_27971	consensus_27980	consensus_27984	consensus_27992	consensus_27997	consensus_28004	consensus_28005	consensus_28017	consensus_28021	consensus_28025	consensus_28026	consensus_28041	consensus_28044	consensus_28052	consensus_28054	consensus_28060	consensus_28063	consensus_28066	consensus_28070	consensus_28075	consensus_28076	consensus_28077	consensus_28082	consensus_28085	consensus_28086	consensus_28091	consensus_28092	consensus_28094	consensus_28095	consensus_28100	consensus_28107	consensus_28109	consensus_28118	consensus_28128	consensus_28129	consensus_28134	consensus_28144	consensus_28149	consensus_28150	consensus_28152	consensus_28155	consensus_28159	consensus_28164	consensus_28168	consensus_28174	consensus_28180	consensus_28181	consensus_28185	consensus_28190	consensus_28196	consensus_28198	consensus_28200	consensus_28205	consensus_28215	consensus_28221	consensus_28226	consensus_28229	consensus_28231	consensus_28233	consensus_28237	consensus_28239	consensus_28243	consensus_28249	consensus_28255	consensus_28274	consensus_28279	consensus_28283	consensus_28309	consensus_28313	consensus_28322	consensus_28327	consensus_28330	consensus_28339	consensus_28343	consensus_28351	consensus_28353	consensus_28355	consensus_28363	consensus_28364	consensus_28372	consensus_28375	consensus_28376	consensus_28383	consensus_28384	consensus_28385	consensus_28391	consensus_28404	consensus_28422	consensus_28428	consensus_28430	consensus_28432	consensus_28434	consensus_28449	consensus_28456	consensus_28462	consensus_28464	consensus_28466	consensus_28471	consensus_28486	consensus_28488	consensus_28494	consensus_28496	consensus_28506	consensus_28507	consensus_28515	consensus_28533	consensus_28541	consensus_28544	consensus_28545	consensus_28550	consensus_28557	consensus_28568	consensus_28571	consensus_28580	consensus_28600	consensus_28602	consensus_28607	consensus_28620	consensus_28628	consensus_28638	consensus_28640	consensus_28647	consensus_28650	consensus_28651	consensus_28652	consensus_28660	consensus_28669	consensus_28683	consensus_28684	consensus_28686	consensus_28689	consensus_28690	consensus_28695	consensus_28699	consensus_28701	consensus_28705	consensus_28710	consensus_28711	consensus_28712	consensus_28714	consensus_28717	consensus_28718	consensus_28720	consensus_28723	consensus_28728	consensus_28732	consensus_28734	consensus_28737	consensus_28739	consensus_28743	consensus_28750	consensus_28760	consensus_28761	consensus_28765	consensus_28766	consensus_28771	consensus_28772	consensus_28777	consensus_28781	consensus_28784	consensus_28789	consensus_28793	consensus_28799	consensus_28801	consensus_28806	consensus_28810	consensus_28820	consensus_28828	consensus_28829	consensus_28830	consensus_28833	consensus_28837	consensus_28840	consensus_28843	consensus_28858	consensus_28869	consensus_28877	consensus_28879	consensus_28890	consensus_28901	consensus_28904	consensus_28906	consensus_28919	consensus_28932	consensus_28936	consensus_28937	consensus_28945	consensus_28952	consensus_28959	consensus_28972	consensus_28977	consensus_28979	consensus_28980	consensus_28986	consensus_28995	consensus_29003	consensus_29005	consensus_29012	consensus_29014	consensus_29017	consensus_29020	consensus_29033	consensus_29036	consensus_29039	consensus_29041	consensus_29044	consensus_29045	consensus_29046	consensus_29052	consensus_29061	consensus_29062	consensus_29063	consensus_29065	consensus_29069	consensus_29070	consensus_29076	consensus_29084	consensus_29091	consensus_29092	consensus_29097	consensus_29098	consensus_29101	consensus_29104	consensus_29117	consensus_29124	consensus_29130	consensus_29142	consensus_29144	consensus_29157	consensus_29161	consensus_29164	consensus_29165	consensus_29173	consensus_29177	consensus_29183	consensus_29186	consensus_29190	consensus_29193	consensus_29205	consensus_29225	consensus_29230	consensus_29231	consensus_29233	consensus_29242	consensus_29252	consensus_29253	consensus_29254	consensus_29259	consensus_29263	consensus_29266	consensus_29271	consensus_29275	consensus_29280	consensus_29286	consensus_29322	consensus_29326	consensus_29328	consensus_29333	consensus_29337	consensus_29338	consensus_29340	consensus_29347	consensus_29355	consensus_29359	consensus_29361	consensus_29366	consensus_29368	consensus_29373	consensus_29379	consensus_29380	consensus_29381	consensus_29395	consensus_29398	consensus_29402	consensus_29409	consensus_29410	consensus_29426	consensus_29430	consensus_29433	consensus_29437	consensus_29442	consensus_29444	consensus_29447	consensus_29449	consensus_29451	consensus_29457	consensus_29458	consensus_29462	consensus_29464	consensus_29470	consensus_29473	consensus_29483	consensus_29484	consensus_29487	consensus_29488	consensus_29492	consensus_29495	consensus_29500	consensus_29504	consensus_29506	consensus_29510	consensus_29515	consensus_29523	consensus_29529	consensus_29533	consensus_29536	consensus_29540	consensus_29542	consensus_29549	consensus_29553	consensus_29560	consensus_29561	consensus_29569	consensus_29574	consensus_29575	consensus_29577	consensus_29578	consensus_29591	consensus_29600	consensus_29602	consensus_29606	consensus_29607	consensus_29611	consensus_29613	consensus_29622	consensus_29625	consensus_29627	consensus_29631	consensus_29639	consensus_29646	consensus_29647	consensus_29648	consensus_29650	consensus_29651	consensus_29660	consensus_29686	consensus_29694	consensus_29697	consensus_29699	consensus_29702	consensus_29709	consensus_29714	consensus_29718	consensus_29719	consensus_29721	consensus_29735	consensus_29743	consensus_29753	consensus_29754	consensus_29756	consensus_29760	consensus_29769	consensus_29770	consensus_29773	consensus_29776	consensus_29779	consensus_29780	consensus_29782	consensus_29785	consensus_29786	consensus_29798	consensus_29799	consensus_29801	consensus_29803	consensus_29811	consensus_29816	consensus_29823	consensus_29831	consensus_29836	consensus_29848	consensus_29850	consensus_29853	consensus_29867	consensus_29870	consensus_29876	consensus_29878	consensus_29881	consensus_29883	consensus_29888	consensus_29889	consensus_29890	consensus_29893	consensus_29896	consensus_29898	consensus_29900	consensus_29901	consensus_29902	consensus_29914	consensus_29915	consensus_29916	consensus_29917	consensus_29918	consensus_29919	consensus_29924	consensus_29926	consensus_29928	consensus_29931	consensus_29939	consensus_29946	consensus_29954	consensus_29955	consensus_29959	consensus_29965	consensus_29969	consensus_29971	consensus_29988	consensus_29995	consensus_29996	consensus_30000	consensus_30009	consensus_30016	consensus_30020	consensus_30024	consensus_30025	consensus_30031	consensus_30032	consensus_30041	consensus_30047	consensus_30052	consensus_30053	consensus_30062	consensus_30066	consensus_30083	consensus_30088	consensus_30093	consensus_30095	consensus_30098	consensus_30100	consensus_30102	consensus_30104	consensus_30115	consensus_30120	consensus_30130	consensus_30134	consensus_30138	consensus_30140	consensus_30148	consensus_30152	consensus_30153	consensus_30155	consensus_30164	consensus_30166	consensus_30171	consensus_30179	consensus_30183	consensus_30190	consensus_30192	consensus_30196	consensus_30199	consensus_30205	consensus_30206	consensus_30211	consensus_30214	consensus_30227	consensus_30232	consensus_30235	consensus_30236	consensus_30238	consensus_30240	consensus_30246	consensus_30247	consensus_30258	consensus_30259	consensus_30263	consensus_30265	consensus_30268	consensus_30281	consensus_30282	consensus_30288	consensus_30295	consensus_30296	consensus_30299	consensus_30301	consensus_30304	consensus_30305	consensus_30306	consensus_30309	consensus_30310	consensus_30312	consensus_30321	consensus_30323	consensus_30325	consensus_30347	consensus_30351	consensus_30355	consensus_30366	consensus_30367	consensus_30376	consensus_30379	consensus_30382	consensus_30390	consensus_30395	consensus_30396	consensus_30403	consensus_30406	consensus_30407	consensus_30409	consensus_30415	consensus_30417	consensus_30418	consensus_30426	consensus_30427	consensus_30433	consensus_30440	consensus_30442	consensus_30445	consensus_30453	consensus_30455	consensus_30456	consensus_30458	consensus_30461	consensus_30465	consensus_30466	consensus_30467	consensus_30468	consensus_30470	consensus_30475	consensus_30476	consensus_30491	consensus_30499	consensus_30502	consensus_30505	consensus_30506	consensus_30507	consensus_30509	consensus_30521	consensus_30523	consensus_30525	consensus_30529	consensus_30531	consensus_30533	consensus_30543	consensus_30554	consensus_30561	consensus_30564	consensus_30567	consensus_30580	consensus_30584	consensus_30587	consensus_30597	consensus_30598	consensus_30601	consensus_30609	consensus_30612	consensus_30614	consensus_30618	consensus_30622	consensus_30625	consensus_30629	consensus_30645	consensus_30648	consensus_30657	consensus_30660	consensus_30667	consensus_30671	consensus_30674	consensus_30675	consensus_30676	consensus_30678	consensus_30686	consensus_30689	consensus_30692	consensus_30693	consensus_30695	consensus_30702	consensus_30703	consensus_30707	consensus_30710	consensus_30713	consensus_30718	consensus_30722	consensus_30726	consensus_30728	consensus_30743	consensus_30747	consensus_30749	consensus_30750	consensus_30752	consensus_30756	consensus_30767	consensus_30769	consensus_30779	consensus_30781	consensus_30794	consensus_30798	consensus_30805	consensus_30814	consensus_30815	consensus_30820	consensus_30826	consensus_30834	consensus_30835	consensus_30840	consensus_30841	consensus_30842	consensus_30845	consensus_30850	consensus_30852	consensus_30853	consensus_30854	consensus_30862	consensus_30863	consensus_30871	consensus_30881	consensus_30884	consensus_30890	consensus_30909	consensus_30919	consensus_30927	consensus_30929	consensus_30938	consensus_30943	consensus_30946	consensus_30951	consensus_30953	consensus_30967	consensus_30977	consensus_30993	consensus_31003	consensus_31012	consensus_31022	consensus_31023	consensus_31024	consensus_31026	consensus_31034	consensus_31035	consensus_31037	consensus_31038	consensus_31057	consensus_31058	consensus_31063	consensus_31064	consensus_31070	consensus_31073	consensus_31074	consensus_31075	consensus_31077	consensus_31082	consensus_31088	consensus_31090	consensus_31092	consensus_31097	consensus_31134	consensus_31142	consensus_31150	consensus_31160	consensus_31163	consensus_31164	consensus_31165	consensus_31168	consensus_31169	consensus_31177	consensus_31178	consensus_31182	consensus_31186	consensus_31188	consensus_31191	consensus_31193	consensus_31197	consensus_31203	consensus_31209	consensus_31210	consensus_31221	consensus_31223	consensus_31224	consensus_31226	consensus_31231	consensus_31235	consensus_31236	consensus_31237	consensus_31247	consensus_31251	consensus_31257	consensus_31258	consensus_31265	consensus_31269	consensus_31270	consensus_31275	consensus_31277	consensus_31281	consensus_31283	consensus_31285	consensus_31295	consensus_31296	consensus_31298	consensus_31299	consensus_31301	consensus_31305	consensus_31307	consensus_31315	consensus_31316	consensus_31319	consensus_31321	consensus_31322	consensus_31326	consensus_31333	consensus_31340	consensus_31343	consensus_31350	consensus_31352	consensus_31358	consensus_31361	consensus_31364	consensus_31371	consensus_31373	consensus_31384	consensus_31388	consensus_31389	consensus_31390	consensus_31397	consensus_31400	consensus_31401	consensus_31403	consensus_31413	consensus_31419	consensus_31428	consensus_31433	consensus_31434	consensus_31443	consensus_31444	consensus_31447	consensus_31448	consensus_31455	consensus_31461	consensus_31466	consensus_31467	consensus_31472	consensus_31481	consensus_31482	consensus_31486	consensus_31490	consensus_31497	consensus_31502	consensus_31504	consensus_31510	consensus_31514	consensus_31518	consensus_31523	consensus_31524	consensus_31532	consensus_31533	consensus_31534	consensus_31546	consensus_31547	consensus_31551	consensus_31553	consensus_31555	consensus_31558	consensus_31560	consensus_31561	consensus_31565	consensus_31567	consensus_31569	consensus_31570	consensus_31573	consensus_31574	consensus_31575	consensus_31580	consensus_31582	consensus_31589	consensus_31594	consensus_31596	consensus_31599	consensus_31605	consensus_31616	consensus_31619	consensus_31622	consensus_31624	consensus_31626	consensus_31627	consensus_31634	consensus_31636	consensus_31656	consensus_31661	consensus_31681	consensus_31683	consensus_31685	consensus_31686	consensus_31704	consensus_31717	consensus_31720	consensus_31722	consensus_31735	consensus_31742	consensus_31745	consensus_31756	consensus_31766	consensus_31776	consensus_31778	consensus_31780	consensus_31784	consensus_31785	consensus_31786	consensus_31788	consensus_31797	consensus_31801	consensus_31802	consensus_31804	consensus_31808	consensus_31810	consensus_31811	consensus_31813	consensus_31819	consensus_31826	consensus_31846	consensus_31850	consensus_31853	consensus_31856	consensus_31859	consensus_31864	consensus_31869	consensus_31875	consensus_31884	consensus_31890	consensus_31891	consensus_31899	consensus_31902	consensus_31903	consensus_31905	consensus_31907	consensus_31909	consensus_31912	consensus_31922	consensus_31923	consensus_31928	consensus_31930	consensus_31935	consensus_31936	consensus_31942	consensus_31952	consensus_31957	consensus_31961	consensus_31963	consensus_31967	consensus_31971	consensus_31974	consensus_31977	consensus_31979	consensus_31980	consensus_31985	consensus_31987	consensus_31988	consensus_31992	consensus_31994	consensus_32001	consensus_32010	consensus_32016	consensus_32018	consensus_32019	consensus_32026	consensus_32032	consensus_32047	consensus_32054	consensus_32056	consensus_32060	consensus_32064	consensus_32070	consensus_32071	consensus_32072	consensus_32075	consensus_32077	consensus_32087	consensus_32094	consensus_32095	consensus_32096	consensus_32104	consensus_32105	consensus_32106	consensus_32108	consensus_32110	consensus_32112	consensus_32121	consensus_32126	consensus_32134	consensus_32139	consensus_32140	consensus_32141	consensus_32142	consensus_32144	consensus_32147	consensus_32150	consensus_32151	consensus_32152	consensus_32154	consensus_32177	consensus_32178	consensus_32179	consensus_32181	consensus_32182	consensus_32183	consensus_32184	consensus_32190	consensus_32199	consensus_32202	consensus_32204	consensus_32205	consensus_32208	consensus_32211	consensus_32212	consensus_32218	consensus_32220	consensus_32222	consensus_32223	consensus_32227	consensus_32233	consensus_32237	consensus_32239	consensus_32240	consensus_32245	consensus_32249	consensus_32251	consensus_32260	consensus_32263	consensus_32266	consensus_32268	consensus_32274	consensus_32275	consensus_32276	consensus_32284	consensus_32286	consensus_32296	consensus_32298	consensus_32314	consensus_32322	consensus_32323	consensus_32326	consensus_32327	consensus_32332	consensus_32335	consensus_32347	consensus_32349	consensus_32355	consensus_32357	consensus_32360	consensus_32361	consensus_32362	consensus_32364	consensus_32372	consensus_32381	consensus_32390	consensus_32393	consensus_32395	consensus_32408	consensus_32414	consensus_32415	consensus_32416	consensus_32417	consensus_32420	consensus_32421	consensus_32423	consensus_32428	consensus_32432	consensus_32434	consensus_32440	consensus_32441	consensus_32465	consensus_32471	consensus_32480	consensus_32483	consensus_32490	consensus_32491	consensus_32493	consensus_32510	consensus_32514	consensus_32518	consensus_32522	consensus_32523	consensus_32524	consensus_32526	consensus_32531	consensus_32537	consensus_32538	consensus_32558	consensus_32560	consensus_32564	consensus_32566	consensus_32580	consensus_32587	consensus_32592	consensus_32594	consensus_32597	consensus_32604	consensus_32608	consensus_32614	consensus_32616	consensus_32625	consensus_32628	consensus_32629	consensus_32630	consensus_32631	consensus_32634	consensus_32642	consensus_32646	consensus_32649	consensus_32651	consensus_32652	consensus_32664	consensus_32692	consensus_32694	consensus_32697	consensus_32701	consensus_32702	consensus_32705	consensus_32717	consensus_32722	consensus_32724	consensus_32725	consensus_32728	consensus_32733	consensus_32736	consensus_32741	consensus_32743	consensus_32746	consensus_32749	consensus_32751	consensus_32752	consensus_32753	consensus_32756	consensus_32758	consensus_32759	consensus_32765	consensus_32774	consensus_32781	consensus_32786	consensus_32790	consensus_32795	consensus_32802	consensus_32805	consensus_32810	consensus_32811	consensus_32821	consensus_32830	consensus_32839	consensus_32840	consensus_32844	consensus_32846	consensus_32855	consensus_32859	consensus_32862	consensus_32866	consensus_32887	consensus_32888	consensus_32892	consensus_32893	consensus_32901	consensus_32909	consensus_32911	consensus_32913	consensus_32922	consensus_32924	consensus_32929	consensus_32930	consensus_32934	consensus_32937	consensus_32949	consensus_32961	consensus_32969	consensus_32971	consensus_32977	consensus_32982	consensus_32983	consensus_32989	consensus_32990	consensus_32992	consensus_32997	consensus_33005	consensus_33012	consensus_33013	consensus_33020	consensus_33045	consensus_33066	consensus_33068	consensus_33078	consensus_33079	consensus_33094	consensus_33099	consensus_33104	consensus_33105	consensus_33106	consensus_33117	consensus_33126	consensus_33133	consensus_33144	consensus_33146	consensus_33148	consensus_33157	consensus_33159	consensus_33160	consensus_33170	consensus_33180	consensus_33195	consensus_33200	consensus_33208	consensus_33210	consensus_33213	consensus_33215	consensus_33216	consensus_33224	consensus_33233	consensus_33234	consensus_33235	consensus_33237	consensus_33246	consensus_33257	consensus_33258	consensus_33259	consensus_33261	consensus_33264	consensus_33278	consensus_33280	consensus_33282	consensus_33283	consensus_33285	consensus_33290	consensus_33294	consensus_33303	consensus_33307	consensus_33312	consensus_33320	consensus_33322	consensus_33323	consensus_33324	consensus_33325	consensus_33327	consensus_33329	consensus_33333	consensus_33339	consensus_33340	consensus_33345	consensus_33347	consensus_33350	consensus_33353	consensus_33359	consensus_33369	consensus_33375	consensus_33377	consensus_33383	consensus_33391	consensus_33395	consensus_33405	consensus_33415	consensus_33417	consensus_33423	consensus_33424	consensus_33433	consensus_33435	consensus_33436	consensus_33437	consensus_33441	consensus_33456	consensus_33466	consensus_33467	consensus_33472	consensus_33493	consensus_33501	consensus_33507	consensus_33508	consensus_33509	consensus_33516	consensus_33520	consensus_33523	consensus_33524	consensus_33532	consensus_33535	consensus_33539	consensus_33542	consensus_33544	consensus_33545	consensus_33548	consensus_33549	consensus_33560	consensus_33562	consensus_33563	consensus_33568	consensus_33570	consensus_33576	consensus_33580	consensus_33584	consensus_33591	consensus_33592	consensus_33599	consensus_33603	consensus_33614	consensus_33617	consensus_33620	consensus_33621	consensus_33628	consensus_33632	consensus_33637	consensus_33646	consensus_33647	consensus_33655	consensus_33657	consensus_33660	consensus_33661	consensus_33672	consensus_33674	consensus_33678	consensus_33682	consensus_33683	consensus_33684	consensus_33686	consensus_33691	consensus_33695	consensus_33698	consensus_33700	consensus_33701	consensus_33706	consensus_33708	consensus_33709	consensus_33715	consensus_33717	consensus_33718	consensus_33723	consensus_33724	consensus_33728	consensus_33738	consensus_33740	consensus_33756	consensus_33767	consensus_33776	consensus_33778	consensus_33781	consensus_33782	consensus_33784	consensus_33802	consensus_33803	consensus_33810	consensus_33811	consensus_33812	consensus_33829	consensus_33836	consensus_33837	consensus_33844	consensus_33849	consensus_33850	consensus_33862	consensus_33866	consensus_33867	consensus_33868	consensus_33873	consensus_33875	consensus_33881	consensus_33884	consensus_33885	consensus_33892	consensus_33893	consensus_33905	consensus_33907	consensus_33909	consensus_33911	consensus_33912	consensus_33918	consensus_33924	consensus_33927	consensus_33931	consensus_33934	consensus_33937	consensus_33941	consensus_33960	consensus_33972	consensus_33973	consensus_33977	consensus_33978	consensus_33990	consensus_33991	consensus_33995	consensus_34003	consensus_34007	consensus_34017	consensus_34029	consensus_34030	consensus_34041	consensus_34044	consensus_34049	consensus_34051	consensus_34052	consensus_34054	consensus_34056	consensus_34066	consensus_34071	consensus_34073	consensus_34074	consensus_34075	consensus_34077	consensus_34080	consensus_34089	consensus_34093	consensus_34096	consensus_34102	consensus_34104	consensus_34110	consensus_34116	consensus_34126	consensus_34134	consensus_34149	consensus_34152	consensus_34162	consensus_34180	consensus_34184	consensus_34188	consensus_34197	consensus_34203	consensus_34217	consensus_34224	consensus_34229	consensus_34230	consensus_34232	consensus_34233	consensus_34241	consensus_34242	consensus_34245	consensus_34247	consensus_34251	consensus_34254	consensus_34260	consensus_34262	consensus_34263	consensus_34272	consensus_34276	consensus_34284	consensus_34285	consensus_34290	consensus_34294	consensus_34295	consensus_34304	consensus_34319	consensus_34338	consensus_34339	consensus_34348	consensus_34353	consensus_34355	consensus_34362	consensus_34364	consensus_34377	consensus_34384	consensus_34385	consensus_34388	consensus_34396	consensus_34397	consensus_34405	consensus_34407	consensus_34417	consensus_34426	consensus_34428	consensus_34430	consensus_34437	consensus_34439	consensus_34441	consensus_34444	consensus_34449	consensus_34450	consensus_34455	consensus_34463	consensus_34464	consensus_34481	consensus_34485	consensus_34487	consensus_34493	consensus_34499	consensus_34502	consensus_34504	consensus_34505	consensus_34506	consensus_34511	consensus_34515	consensus_34517	consensus_34518	consensus_34520	consensus_34526	consensus_34529	consensus_34559	consensus_34562	consensus_34566	consensus_34567	consensus_34568	consensus_34569	consensus_34575	consensus_34577	consensus_34578	consensus_34580	consensus_34581	consensus_34592	consensus_34596	consensus_34603	consensus_34611	consensus_34612	consensus_34621	consensus_34625	consensus_34635	consensus_34650	consensus_34651	consensus_34652	consensus_34656	consensus_34667	consensus_34669	consensus_34670	consensus_34686	consensus_34689	consensus_34690	consensus_34697	consensus_34698	consensus_34699	consensus_34704	consensus_34706	consensus_34709	consensus_34710	consensus_34711	consensus_34719	consensus_34723	consensus_34729	consensus_34732	consensus_34738	consensus_34744	consensus_34746	consensus_34747	consensus_34753	consensus_34760	consensus_34761	consensus_34763	consensus_34764	consensus_34767	consensus_34775	consensus_34792	consensus_34794	consensus_34796	consensus_34798	consensus_34804	consensus_34807	consensus_34808	consensus_34820	consensus_34821	consensus_34825	consensus_34849	consensus_34853	consensus_34854	consensus_34861	consensus_34865	consensus_34878	consensus_34879	consensus_34887	consensus_34890	consensus_34894	consensus_34900	consensus_34903	consensus_34905	consensus_34906	consensus_34912	consensus_34915	consensus_34918	consensus_34919	consensus_34938	consensus_34939	consensus_34942	consensus_34947	consensus_34953	consensus_34954	consensus_34960	consensus_34961	consensus_34970	consensus_34977	consensus_34980	consensus_34982	consensus_34985	consensus_34993	consensus_35003	consensus_35016	consensus_35018	consensus_35020	consensus_35021	consensus_35022	consensus_35030	consensus_35037	consensus_35040	consensus_35054	consensus_35060	consensus_35064	consensus_35071	consensus_35079	consensus_35083	consensus_35086	consensus_35087	consensus_35102	consensus_35106	consensus_35119	consensus_35124	consensus_35127	consensus_35129	consensus_35140	consensus_35142	consensus_35144	consensus_35151	consensus_35157	consensus_35163	consensus_35164	consensus_35165	consensus_35168	consensus_35170	consensus_35181	consensus_35185	consensus_35189	consensus_35194	consensus_35216	consensus_35219	consensus_35222	consensus_35230	consensus_35232	consensus_35235	consensus_35238	consensus_35249	consensus_35254	consensus_35257	consensus_35262	consensus_35263	consensus_35264	consensus_35269	consensus_35271	consensus_35285	consensus_35288	consensus_35291	consensus_35296	consensus_35302	consensus_35303	consensus_35306	consensus_35309	consensus_35314	consensus_35316	consensus_35324	consensus_35327	consensus_35328	consensus_35334	consensus_35342	consensus_35345	consensus_35348	consensus_35356	consensus_35359	consensus_35362	consensus_35363	consensus_35367	consensus_35371	consensus_35382	consensus_35383	consensus_35400	consensus_35411	consensus_35417	consensus_35418	consensus_35420	consensus_35421	consensus_35424	consensus_35427	consensus_35428	consensus_35429	consensus_35433	consensus_35434	consensus_35437	consensus_35438	consensus_35440	consensus_35442	consensus_35443	consensus_35444	consensus_35445	consensus_35447	consensus_35448	consensus_35452	consensus_35456	consensus_35459	consensus_35466	consensus_35469	consensus_35476	consensus_35485	consensus_35490	consensus_35491	consensus_35492	consensus_35499	consensus_35509	consensus_35511	consensus_35522	consensus_35527	consensus_35530	consensus_35531	consensus_35541	consensus_35544	consensus_35551	consensus_35553	consensus_35564	consensus_35566	consensus_35567	consensus_35568	consensus_35587	consensus_35595	consensus_35596	consensus_35603	consensus_35605	consensus_35608	consensus_35610	consensus_35611	consensus_35615	consensus_35639	consensus_35644	consensus_35650	consensus_35651	consensus_35662	consensus_35666	consensus_35668	consensus_35673	consensus_35675	consensus_35676	consensus_35683	consensus_35695	consensus_35698	consensus_35701	consensus_35704	consensus_35708	consensus_35717	consensus_35718	consensus_35719	consensus_35723	consensus_35731	consensus_35742	consensus_35743	consensus_35745	consensus_35748	consensus_35754	consensus_35770	consensus_35776	consensus_35784	consensus_35796	consensus_35799	consensus_35801	consensus_35804	consensus_35814	consensus_35823	consensus_35827	consensus_35828	consensus_35830	consensus_35832	consensus_35854	consensus_35856	consensus_35858	consensus_35859	consensus_35861	consensus_35865	consensus_35870	consensus_35895	consensus_35896	consensus_35906	consensus_35907	consensus_35911	consensus_35912	consensus_35919	consensus_35923	consensus_35931	consensus_35933	consensus_35942	consensus_35943	consensus_35944	consensus_35947	consensus_35960	consensus_35973	consensus_35974	consensus_35976	consensus_35986	consensus_35987	consensus_35988	consensus_35992	consensus_35994	consensus_35995	consensus_36008	consensus_36009	consensus_36012	consensus_36022	consensus_36026	consensus_36027	consensus_36029	consensus_36031	consensus_36040	consensus_36044	consensus_36052	consensus_36060	consensus_36062	consensus_36067	consensus_36073	consensus_36077	consensus_36080	consensus_36081	consensus_36083	consensus_36092	consensus_36101	consensus_36102	consensus_36107	consensus_36111	consensus_36117	consensus_36121	consensus_36127	consensus_36128	consensus_36139	consensus_36144	consensus_36156	consensus_36158	consensus_36166	consensus_36167	consensus_36171	consensus_36191	consensus_36210	consensus_36213	consensus_36214	consensus_36233	consensus_36237	consensus_36238	consensus_36243	consensus_36245	consensus_36259	consensus_36268	consensus_36269	consensus_36273	consensus_36283	consensus_36289	consensus_36294	consensus_36298	consensus_36303	consensus_36311	consensus_36324	consensus_36334	consensus_36349	consensus_36351	consensus_36360	consensus_36364	consensus_36370	consensus_36380	consensus_36386	consensus_36388	consensus_36395	consensus_36396	consensus_36398	consensus_36402	consensus_36407	consensus_36414	consensus_36420	consensus_36423	consensus_36427	consensus_36435	consensus_36439	consensus_36442	consensus_36444	consensus_36445	consensus_36450	consensus_36451	consensus_36452	consensus_36454	consensus_36458	consensus_36459	consensus_36469	consensus_36471	consensus_36475	consensus_36478	consensus_36479	consensus_36487	consensus_36493	consensus_36497	consensus_36498	consensus_36500	consensus_36501	consensus_36502	consensus_36504	consensus_36505	consensus_36510	consensus_36513	consensus_36536	consensus_36548	consensus_36554	consensus_36564	consensus_36572	consensus_36577	consensus_36583	consensus_36587	consensus_36591	consensus_36592	consensus_36597	consensus_36599	consensus_36606	consensus_36610	consensus_36613	consensus_36615	consensus_36623	consensus_36639	consensus_36641	consensus_36653	consensus_36654	consensus_36658	consensus_36668	consensus_36676	consensus_36679	consensus_36683	consensus_36686	consensus_36691	consensus_36693	consensus_36695	consensus_36700	consensus_36702	consensus_36703	consensus_36704	consensus_36705	consensus_36708	consensus_36710	consensus_36711	consensus_36716	consensus_36718	consensus_36719	consensus_36727	consensus_36731	consensus_36740	consensus_36744	consensus_36750	consensus_36753	consensus_36754	consensus_36758	consensus_36762	consensus_36765	consensus_36767	consensus_36771	consensus_36772	consensus_36774	consensus_36775	consensus_36778	consensus_36780	consensus_36791	consensus_36792	consensus_36794	consensus_36795	consensus_36797	consensus_36798	consensus_36811	consensus_36813	consensus_36820	consensus_36822	consensus_36824	consensus_36825	consensus_36850	consensus_36853	consensus_36860	consensus_36877	consensus_36883	consensus_36886	consensus_36891	consensus_36905	consensus_36910	consensus_36911	consensus_36918	consensus_36921	consensus_36925	consensus_36946	consensus_36949	consensus_36952	consensus_36961	consensus_36975	consensus_36977	consensus_36980	consensus_36984	consensus_36990	consensus_36991	consensus_36997	consensus_37001	consensus_37002	consensus_37007	consensus_37008	consensus_37037	consensus_37042	consensus_37047	consensus_37054	consensus_37066	consensus_37074	consensus_37080	consensus_37082	consensus_37085	consensus_37090	consensus_37098	consensus_37103	consensus_37105	consensus_37107	consensus_37116	consensus_37117	consensus_37125	consensus_37130	consensus_37136	consensus_37137	consensus_37139	consensus_37141	consensus_37145	consensus_37153	consensus_37155	consensus_37157	consensus_37162	consensus_37165	consensus_37166	consensus_37174	consensus_37176	consensus_37185	consensus_37187	consensus_37195	consensus_37198	consensus_37210	consensus_37220	consensus_37222	consensus_37228	consensus_37230	consensus_37237	consensus_37241	consensus_37246	consensus_37251	consensus_37264	consensus_37270	consensus_37274	consensus_37275	consensus_37280	consensus_37287	consensus_37289	consensus_37291	consensus_37292	consensus_37293	consensus_37295	consensus_37297	consensus_37298	consensus_37301	consensus_37303	consensus_37323	consensus_37332	consensus_37333	consensus_37348	consensus_37353	consensus_37356	consensus_37357	consensus_37362	consensus_37367	consensus_37369	consensus_37374	consensus_37378	consensus_37380	consensus_37382	consensus_37383	consensus_37385	consensus_37388	consensus_37402	consensus_37403	consensus_37408	consensus_37414	consensus_37415	consensus_37418	consensus_37423	consensus_37426	consensus_37430	consensus_37431	consensus_37434	consensus_37438	consensus_37448	consensus_37455	consensus_37461	consensus_37462	consensus_37465	consensus_37466	consensus_37468	consensus_37492	consensus_37505	consensus_37507	consensus_37510	consensus_37514	consensus_37516	consensus_37527	consensus_37529	consensus_37538	consensus_37547	consensus_37550	consensus_37551	consensus_37554	consensus_37559	consensus_37568	consensus_37577	consensus_37582	consensus_37584	consensus_37592	consensus_37603	consensus_37604	consensus_37608	consensus_37610	consensus_37612	consensus_37616	consensus_37619	consensus_37622	consensus_37629	consensus_37644	consensus_37647	consensus_37654	consensus_37663	consensus_37671	consensus_37685	consensus_37689	consensus_37690	consensus_37708	consensus_37709	consensus_37713	consensus_37719	consensus_37724	consensus_37741	consensus_37752	consensus_37755	consensus_37765	consensus_37767	consensus_37769	consensus_37774	consensus_37781	consensus_37783	consensus_37797	consensus_37798	consensus_37801	consensus_37802	consensus_37805	consensus_37806	consensus_37810	consensus_37813	consensus_37816	consensus_37825	consensus_37840	consensus_37841	consensus_37850	consensus_37861	consensus_37863	consensus_37878	consensus_37881	consensus_37886	consensus_37888	consensus_37894	consensus_37896	consensus_37903	consensus_37904	consensus_37907	consensus_37909	consensus_37910	consensus_37924	consensus_37926	consensus_37927	consensus_37929	consensus_37930	consensus_37940	consensus_37951	consensus_37960	consensus_37968	consensus_37976	consensus_37979	consensus_37988	consensus_37989	consensus_37994	consensus_37995	consensus_37999	consensus_38005	consensus_38016	consensus_38022	consensus_38029	consensus_38036	consensus_38039	consensus_38042	consensus_38049	consensus_38052	consensus_38060	consensus_38062	consensus_38071	consensus_38074	consensus_38078	consensus_38082	consensus_38089	consensus_38096	consensus_38112	consensus_38114	consensus_38116	consensus_38118	consensus_38142	consensus_38147	consensus_38155	consensus_38157	consensus_38162	consensus_38165	consensus_38171	consensus_38177	consensus_38193	consensus_38194	consensus_38197	consensus_38203	consensus_38208	consensus_38209	consensus_38211	consensus_38212	consensus_38216	consensus_38219	consensus_38222	consensus_38226	consensus_38249	consensus_38250	consensus_38252	consensus_38261	consensus_38264	consensus_38276	consensus_38284	consensus_38289	consensus_38291	consensus_38295	consensus_38296	consensus_38302	consensus_38308	consensus_38309	consensus_38324	consensus_38327	consensus_38339	consensus_38351	consensus_38355	consensus_38356	consensus_38372	consensus_38377	consensus_38380	consensus_38386	consensus_38399	consensus_38410	consensus_38418	consensus_38423	consensus_38432	consensus_38449	consensus_38452	consensus_38461	consensus_38464	consensus_38465	consensus_38466	consensus_38468	consensus_38469	consensus_38478	consensus_38482	consensus_38488	consensus_38489	consensus_38491	consensus_38494	consensus_38495	consensus_38496	consensus_38497	consensus_38504	consensus_38507	consensus_38510	consensus_38511	consensus_38517	consensus_38520	consensus_38524	consensus_38526	consensus_38538	consensus_38544	consensus_38545	consensus_38546	consensus_38551	consensus_38555	consensus_38558	consensus_38565	consensus_38566	consensus_38582	consensus_38585	consensus_38592	consensus_38598	consensus_38602	consensus_38606	consensus_38608	consensus_38615	consensus_38622	consensus_38624	consensus_38632	consensus_38634	consensus_38635	consensus_38643	consensus_38650	consensus_38654	consensus_38659	consensus_38662	consensus_38663	consensus_38668	consensus_38675	consensus_38677	consensus_38683	consensus_38685	consensus_38688	consensus_38691	consensus_38694	consensus_38700	consensus_38709	consensus_38712	consensus_38713	consensus_38715	consensus_38720	consensus_38724	consensus_38726	consensus_38727	consensus_38728	consensus_38733	consensus_38739	consensus_38754	consensus_38756	consensus_38757	consensus_38764	consensus_38765	consensus_38771	consensus_38785	consensus_38786	consensus_38796	consensus_38800	consensus_38803	consensus_38808	consensus_38814	consensus_38827	consensus_38831	consensus_38843	consensus_38844	consensus_38857	consensus_38861	consensus_38873	consensus_38877	consensus_38880	consensus_38888	consensus_38891	consensus_38895	consensus_38901	consensus_38903	consensus_38904	consensus_38919	consensus_38921	consensus_38925	consensus_38929	consensus_38938	consensus_38940	consensus_38945	consensus_38949	consensus_38954	consensus_38957	consensus_38958	consensus_38960	consensus_38963	consensus_38968	consensus_38971	consensus_38973	consensus_38986	consensus_38987	consensus_38993	consensus_38997	consensus_39004	consensus_39008	consensus_39016	consensus_39021	consensus_39022	consensus_39025	consensus_39034	consensus_39035	consensus_39041	consensus_39046	consensus_39047	consensus_39051	consensus_39058	consensus_39064	consensus_39065	consensus_39069	consensus_39072	consensus_39074	consensus_39089	consensus_39091	consensus_39099	consensus_39103	consensus_39104	consensus_39106	consensus_39108	consensus_39110	consensus_39121	consensus_39127	consensus_39136	consensus_39145	consensus_39153	consensus_39161	consensus_39171	consensus_39172	consensus_39174	consensus_39184	consensus_39193	consensus_39194	consensus_39201	consensus_39206	consensus_39212	consensus_39213	consensus_39217	consensus_39222	consensus_39226	consensus_39233	consensus_39238	consensus_39257	consensus_39267	consensus_39269	consensus_39271	consensus_39287	consensus_39297	consensus_39310	consensus_39322	consensus_39325	consensus_39328	consensus_39330	consensus_39333	consensus_39334	consensus_39342	consensus_39348	consensus_39349	consensus_39353	consensus_39359	consensus_39362	consensus_39365	consensus_39366	consensus_39367	consensus_39369	consensus_39377	consensus_39387	consensus_39392	consensus_39393	consensus_39401	consensus_39402	consensus_39415	consensus_39416	consensus_39417	consensus_39418	consensus_39421	consensus_39422	consensus_39423	consensus_39427	consensus_39428	consensus_39432	consensus_39433	consensus_39436	consensus_39438	consensus_39456	consensus_39466	consensus_39473	consensus_39475	consensus_39476	consensus_39482	consensus_39488	consensus_39490	consensus_39492	consensus_39514	consensus_39522	consensus_39523	consensus_39526	consensus_39527	consensus_39532	consensus_39536	consensus_39537	consensus_39538	consensus_39544	consensus_39546	consensus_39550	consensus_39551	consensus_39557	consensus_39564	consensus_39569	consensus_39585	consensus_39587	consensus_39589	consensus_39590	consensus_39592	consensus_39594	consensus_39599	consensus_39602	consensus_39607	consensus_39608	consensus_39614	consensus_39621	consensus_39627	consensus_39631	consensus_39634	consensus_39639	consensus_39649	consensus_39650	consensus_39662	consensus_39664	consensus_39668	consensus_39697	consensus_39704	consensus_39708	consensus_39719	consensus_39720	consensus_39723	consensus_39729	consensus_39740	consensus_39745	consensus_39754	consensus_39759	consensus_39763	consensus_39765	consensus_39766	consensus_39775	consensus_39779	consensus_39780	consensus_39787	consensus_39797	consensus_39798	consensus_39799	consensus_39802	consensus_39811	consensus_39813	consensus_39815	consensus_39817	consensus_39820	consensus_39826	consensus_39827	consensus_39839	consensus_39843	consensus_39850	consensus_39852	consensus_39860	consensus_39866	consensus_39876	consensus_39879	consensus_39881	consensus_39882	consensus_39883	consensus_39890	consensus_39899	consensus_39904	consensus_39912	consensus_39915	consensus_39916	consensus_39920	consensus_39928	consensus_39932	consensus_39943	consensus_39945	consensus_39960	consensus_39962	consensus_39968	consensus_39969	consensus_39972	consensus_39973	consensus_39984	consensus_39993	consensus_39997	consensus_39999	consensus_40000	consensus_40004	consensus_40008	consensus_40019	consensus_40024	consensus_40027	consensus_40031	consensus_40037	consensus_40038	consensus_40045	consensus_40046	consensus_40047	consensus_40049	consensus_40050	consensus_40057	consensus_40058	consensus_40060	consensus_40068	consensus_40071	consensus_40078	consensus_40082	consensus_40089	consensus_40092	consensus_40093	consensus_40094	consensus_40115	consensus_40117	consensus_40118	consensus_40128	consensus_40131	consensus_40146	consensus_40148	consensus_40159	consensus_40160	consensus_40165	consensus_40169	consensus_40170	consensus_40173	consensus_40175	consensus_40178	consensus_40180	consensus_40185	consensus_40190	consensus_40204	consensus_40205	consensus_40208	consensus_40224	consensus_40233	consensus_40238	consensus_40241	consensus_40243	consensus_40246	consensus_40256	consensus_40258	consensus_40259	consensus_40261	consensus_40262	consensus_40269	consensus_40273	consensus_40277	consensus_40296	consensus_40302	consensus_40314	consensus_40320	consensus_40322	consensus_40330	consensus_40337	consensus_40343	consensus_40344	consensus_40346	consensus_40349	consensus_40350	consensus_40352	consensus_40353	consensus_40358	consensus_40365	consensus_40369	consensus_40372	consensus_40373	consensus_40377	consensus_40381	consensus_40387	consensus_40391	consensus_40397	consensus_40400	consensus_40410	consensus_40412	consensus_40427	consensus_40439	consensus_40445	consensus_40446	consensus_40449	consensus_40450	consensus_40452	consensus_40454	consensus_40457	consensus_40458	consensus_40461	consensus_40470	consensus_40472	consensus_40481	consensus_40484	consensus_40494	consensus_40501	consensus_40511	consensus_40512	consensus_40513	consensus_40519	consensus_40523	consensus_40526	consensus_40529	consensus_40531	consensus_40532	consensus_40533	consensus_40534	consensus_40538	consensus_40539	consensus_40541	consensus_40542	consensus_40546	consensus_40552	consensus_40553	consensus_40560	consensus_40563	consensus_40565	consensus_40568	consensus_40573	consensus_40595	consensus_40597	consensus_40600	consensus_40601	consensus_40603	consensus_40604	consensus_40615	consensus_40622	consensus_40628	consensus_40631	consensus_40633	consensus_40635	consensus_40661	consensus_40666	consensus_40671	consensus_40677	consensus_40686	consensus_40697	consensus_40700	consensus_40707	consensus_40708	consensus_40711	consensus_40715	consensus_40716	consensus_40723	consensus_40730	consensus_40734	consensus_40735	consensus_40738	consensus_40744	consensus_40758	consensus_40777	consensus_40781	consensus_40782	consensus_40784	consensus_40788	consensus_40790	consensus_40800	consensus_40801	consensus_40804	consensus_40814	consensus_40815	consensus_40818	consensus_40820	consensus_40821	consensus_40824	consensus_40826	consensus_40832	consensus_40835	consensus_40842	consensus_40843	consensus_40858	consensus_40861	consensus_40864	consensus_40868	consensus_40882	consensus_40884	consensus_40893	consensus_40894	consensus_40903	consensus_40910	consensus_40917	consensus_40923	consensus_40924	consensus_40925	consensus_40927	consensus_40932	consensus_40937	consensus_40943	consensus_40945	consensus_40946	consensus_40954	consensus_40958	consensus_40959	consensus_40968	consensus_40969	consensus_40972	consensus_40976	consensus_40984	consensus_40986	consensus_40992	consensus_40996	consensus_41011	consensus_41014	consensus_41018	consensus_41021	consensus_41022	consensus_41023	consensus_41026	consensus_41031	consensus_41034	consensus_41041	consensus_41046	consensus_41049	consensus_41057	consensus_41062	consensus_41065	consensus_41067	consensus_41068	consensus_41079	consensus_41082	consensus_41089	consensus_41092	consensus_41124	consensus_41126	consensus_41132	consensus_41137	consensus_41140	consensus_41142	consensus_41147	consensus_41150	consensus_41151	consensus_41157	consensus_41173	consensus_41186	consensus_41198	consensus_41203	consensus_41204	consensus_41206	consensus_41214	consensus_41218	consensus_41219	consensus_41220	consensus_41223	consensus_41237	consensus_41244	consensus_41245	consensus_41250	consensus_41260	consensus_41271	consensus_41279	consensus_41280	consensus_41294	consensus_41295	consensus_41298	consensus_41300	consensus_41313	consensus_41314	consensus_41315	consensus_41332	consensus_41335	consensus_41339	consensus_41347	consensus_41348	consensus_41350	consensus_41372	consensus_41389	consensus_41390	consensus_41397	consensus_41398	consensus_41404	consensus_41410	consensus_41412	consensus_41416	consensus_41419	consensus_41425	consensus_41433	consensus_41442	consensus_41447	consensus_41448	consensus_41456	consensus_41460	consensus_41465	consensus_41475	consensus_41482	consensus_41489	consensus_41504	consensus_41505	consensus_41507	consensus_41508	consensus_41522	consensus_41524	consensus_41533	consensus_41541	consensus_41544	consensus_41546	consensus_41548	consensus_41549	consensus_41563	consensus_41567	consensus_41573	consensus_41576	consensus_41577	consensus_41580	consensus_41587	consensus_41588	consensus_41590	consensus_41592	consensus_41596	consensus_41597	consensus_41603	consensus_41607	consensus_41610	consensus_41619	consensus_41623	consensus_41625	consensus_41626	consensus_41631	consensus_41635	consensus_41644	consensus_41663	consensus_41666	consensus_41668	consensus_41671	consensus_41673	consensus_41678	consensus_41679	consensus_41681	consensus_41691	consensus_41692	consensus_41699	consensus_41700	consensus_41704	consensus_41710	consensus_41717	consensus_41728	consensus_41729	consensus_41732	consensus_41733	consensus_41735	consensus_41736	consensus_41738	consensus_41740	consensus_41748	consensus_41758	consensus_41762	consensus_41770	consensus_41771	consensus_41775	consensus_41778	consensus_41789	consensus_41798	consensus_41799	consensus_41821	consensus_41827	consensus_41829	consensus_41830	consensus_41833	consensus_41834	consensus_41843	consensus_41847	consensus_41854	consensus_41857	consensus_41859	consensus_41891	consensus_41899	consensus_41906	consensus_41913	consensus_41918	consensus_41932	consensus_41934	consensus_41937	consensus_41939	consensus_41949	consensus_41950	consensus_41953	consensus_41957	consensus_41961	consensus_41964	consensus_41967	consensus_41969	consensus_41972	consensus_41982	consensus_41984	consensus_41990	consensus_41995	consensus_41996	consensus_41998	consensus_42000	consensus_42005	consensus_42018	consensus_42020	consensus_42025	consensus_42029	consensus_42030	consensus_42039	consensus_42045	consensus_42054	consensus_42059	consensus_42060	consensus_42062	consensus_42063	consensus_42065	consensus_42071	consensus_42072	consensus_42081	consensus_42087	consensus_42089	consensus_42093	consensus_42094	consensus_42095	consensus_42097	consensus_42102	consensus_42108	consensus_42111	consensus_42116	consensus_42122	consensus_42126	consensus_42127	consensus_42130	consensus_42132	consensus_42133	consensus_42135	consensus_42142	consensus_42144	consensus_42148	consensus_42149	consensus_42156	consensus_42167	consensus_42172	consensus_42185	consensus_42188	consensus_42194	consensus_42200	consensus_42201	consensus_42202	consensus_42212	consensus_42214	consensus_42217	consensus_42218	consensus_42221	consensus_42240	consensus_42242	consensus_42247	consensus_42255	consensus_42263	consensus_42270	consensus_42272	consensus_42274	consensus_42282	consensus_42284	consensus_42292	consensus_42293	consensus_42297	consensus_42303	consensus_42317	consensus_42319	consensus_42323	consensus_42324	consensus_42325	consensus_42331	consensus_42339	consensus_42345	consensus_42351	consensus_42352	consensus_42362	consensus_42372	consensus_42393	consensus_42395	consensus_42403	consensus_42406	consensus_42410	consensus_42414	consensus_42416	consensus_42423	consensus_42436	consensus_42449	consensus_42452	consensus_42454	consensus_42455	consensus_42456	consensus_42462	consensus_42470	consensus_42472	consensus_42484	consensus_42493	consensus_42496	consensus_42497	consensus_42503	consensus_42509	consensus_42510	consensus_42514	consensus_42522	consensus_42530	consensus_42535	consensus_42545	consensus_42547	consensus_42550	consensus_42557	consensus_42570	consensus_42571	consensus_42574	consensus_42578	consensus_42599	consensus_42605	consensus_42617	consensus_42619	consensus_42622	consensus_42635	consensus_42645	consensus_42654	consensus_42656	consensus_42674	consensus_42677	consensus_42686	consensus_42699	consensus_42706	consensus_42708	consensus_42713	consensus_42718	consensus_42719	consensus_42730	consensus_42751	consensus_42756	consensus_42761	consensus_42766	consensus_42768	consensus_42772	consensus_42782	consensus_42784	consensus_42794	consensus_42795	consensus_42799	consensus_42800	consensus_42802	consensus_42809	consensus_42832	consensus_42850	consensus_42851	consensus_42861	consensus_42865	consensus_42872	consensus_42874	consensus_42887	consensus_42890	consensus_42895	consensus_42899	consensus_42905	consensus_42918	consensus_42928	consensus_42932	consensus_42944	consensus_42949	consensus_42953	consensus_42963	consensus_42968	consensus_42979	consensus_42996	consensus_42997	consensus_43002	consensus_43010	consensus_43012	consensus_43021	consensus_43022	consensus_43053	consensus_43054	consensus_43055	consensus_43056	consensus_43060	consensus_43068	consensus_43072	consensus_43079	consensus_43084	consensus_43095	consensus_43100	consensus_43103	consensus_43104	consensus_43105	consensus_43114	consensus_43115	consensus_43116	consensus_43117	consensus_43128	consensus_43134	consensus_43136	consensus_43138	consensus_43139	consensus_43148	consensus_43151	consensus_43157	consensus_43159	consensus_43164	consensus_43165	consensus_43171	consensus_43176	consensus_43184	consensus_43198	consensus_43202	consensus_43204	consensus_43212	consensus_43214	consensus_43220	consensus_43224	consensus_43225	consensus_43231	consensus_43233	consensus_43241	consensus_43243	consensus_43246	consensus_43247	consensus_43248	consensus_43250	consensus_43252	consensus_43253	consensus_43261	consensus_43267	consensus_43276	consensus_43278	consensus_43288	consensus_43294	consensus_43297	consensus_43304	consensus_43312	consensus_43314	consensus_43324	consensus_43327	consensus_43331	consensus_43334	consensus_43335	consensus_43340	consensus_43341	consensus_43348	consensus_43350	consensus_43352	consensus_43360	consensus_43374	consensus_43375	consensus_43376	consensus_43378	consensus_43381	consensus_43382	consensus_43388	consensus_43393	consensus_43394	consensus_43397	consensus_43400	consensus_43403	consensus_43408	consensus_43409	consensus_43412	consensus_43415	consensus_43422	consensus_43430	consensus_43431	consensus_43433	consensus_43441	consensus_43446	consensus_43447	consensus_43450	consensus_43458	consensus_43464	consensus_43470	consensus_43477	consensus_43479	consensus_43492	consensus_43500	consensus_43510	consensus_43517	consensus_43525	consensus_43528	consensus_43539	consensus_43554	consensus_43569	consensus_43573	consensus_43575	consensus_43588	consensus_43589	consensus_43614	consensus_43616	consensus_43617	consensus_43618	consensus_43623	consensus_43628	consensus_43629	consensus_43633	consensus_43639	consensus_43640	consensus_43645	consensus_43646	consensus_43660	consensus_43663	consensus_43664	consensus_43669	consensus_43679	consensus_43685	consensus_43688	consensus_43692	consensus_43694	consensus_43695	consensus_43697	consensus_43700	consensus_43704	consensus_43709	consensus_43710	consensus_43711	consensus_43720	consensus_43721	consensus_43722	consensus_43724	consensus_43725	consensus_43731	consensus_43734	consensus_43737	consensus_43742	consensus_43744	consensus_43746	consensus_43755	consensus_43757	consensus_43766	consensus_43779	consensus_43790	consensus_43791	consensus_43803	consensus_43805	consensus_43807	consensus_43811	consensus_43812	consensus_43814	consensus_43820	consensus_43823	consensus_43827	consensus_43828	consensus_43848	consensus_43859	consensus_43874	consensus_43875	consensus_43881	consensus_43886	consensus_43888	consensus_43889	consensus_43890	consensus_43894	consensus_43900	consensus_43906	consensus_43914	consensus_43921	consensus_43924	consensus_43935	consensus_43939	consensus_43942	consensus_43946	consensus_43956	consensus_43959	consensus_43963	consensus_43973	consensus_43975	consensus_43990	consensus_43991	consensus_43996	consensus_44000	consensus_44012	consensus_44021	consensus_44031	consensus_44034	consensus_44060	consensus_44065	consensus_44073	consensus_44078	consensus_44083	consensus_44089	consensus_44094	consensus_44096	consensus_44097	consensus_44101	consensus_44136	consensus_44140	consensus_44142	consensus_44145	consensus_44151	consensus_44156	consensus_44164	consensus_44170	consensus_44176	consensus_44180	consensus_44185	consensus_44194	consensus_44197	consensus_44203	consensus_44206	consensus_44207	consensus_44208	consensus_44228	consensus_44235	consensus_44249	consensus_44251	consensus_44253	consensus_44263	consensus_44295	consensus_44299	consensus_44303	consensus_44312	consensus_44316	consensus_44318	consensus_44320	consensus_44332	consensus_44334	consensus_44338	consensus_44342	consensus_44347	consensus_44361	consensus_44362	consensus_44376	consensus_44380	consensus_44383	consensus_44384	consensus_44387	consensus_44388	consensus_44390	consensus_44391	consensus_44393	consensus_44395	consensus_44403	consensus_44405	consensus_44411	consensus_44424	consensus_44446	consensus_44461	consensus_44469	consensus_44470	consensus_44474	consensus_44478	consensus_44480	consensus_44481	consensus_44492	consensus_44493	consensus_44499	consensus_44500	consensus_44501	consensus_44512	consensus_44520	consensus_44521	consensus_44524	consensus_44525	consensus_44527	consensus_44545	consensus_44550	consensus_44565	consensus_44573	consensus_44574	consensus_44575	consensus_44586	consensus_44587	consensus_44593	consensus_44610	consensus_44612	consensus_44627	consensus_44636	consensus_44639	consensus_44641	consensus_44644	consensus_44645	consensus_44650	consensus_44659	consensus_44662	consensus_44666	consensus_44670	consensus_44682	consensus_44687	consensus_44689	consensus_44695	consensus_44704	consensus_44715	consensus_44728	consensus_44731	consensus_44733	consensus_44736	consensus_44739	consensus_44742	consensus_44745	consensus_44750	consensus_44754	consensus_44762	consensus_44764	consensus_44769	consensus_44778	consensus_44779	consensus_44787	consensus_44793	consensus_44799	consensus_44805	consensus_44814	consensus_44815	consensus_44819	consensus_44822	consensus_44826	consensus_44832	consensus_44838	consensus_44839	consensus_44843	consensus_44846	consensus_44857	consensus_44867	consensus_44876	consensus_44877	consensus_44878	consensus_44885	consensus_44899	consensus_44900	consensus_44909	consensus_44910	consensus_44912	consensus_44921	consensus_44927	consensus_44933	consensus_44935	consensus_44940	consensus_44945	consensus_44951	consensus_44954	consensus_44969	consensus_44971	consensus_44974	consensus_44979	consensus_44981	consensus_44985	consensus_44986	consensus_44993	consensus_44999	consensus_45003	consensus_45010	consensus_45011	consensus_45013	consensus_45024	consensus_45026	consensus_45028	consensus_45030	consensus_45032	consensus_45033	consensus_45051	consensus_45056	consensus_45076	consensus_45082	consensus_45090	consensus_45105	consensus_45118	consensus_45121	consensus_45131	consensus_45160	consensus_45161	consensus_45165	consensus_45167	consensus_45169	consensus_45172	consensus_45180	consensus_45192	consensus_45197	consensus_45200	consensus_45202	consensus_45204	consensus_45225	consensus_45226	consensus_45227	consensus_45228	consensus_45230	consensus_45231	consensus_45237	consensus_45246	consensus_45248	consensus_45259	consensus_45262	consensus_45270	consensus_45275	consensus_45278	consensus_45286	consensus_45291	consensus_45294	consensus_45296	consensus_45299	consensus_45303	consensus_45307	consensus_45311	consensus_45319	consensus_45327	consensus_45328	consensus_45331	consensus_45334	consensus_45354	consensus_45368	consensus_45373	consensus_45379	consensus_45382	consensus_45391	consensus_45400	consensus_45401	consensus_45404	consensus_45410	consensus_45414	consensus_45417	consensus_45425	consensus_45432	consensus_45433	consensus_45439	consensus_45448	consensus_45450	consensus_45454	consensus_45461	consensus_45465	consensus_45468	consensus_45470	consensus_45479	consensus_45481	consensus_45497	consensus_45506	consensus_45521	consensus_45535	consensus_45549	consensus_45553	consensus_45557	consensus_45559	consensus_45565	consensus_45573	consensus_45583	consensus_45586	consensus_45587	consensus_45590	consensus_45597	consensus_45620	consensus_45621	consensus_45627	consensus_45635	consensus_45642	consensus_45645	consensus_45650	consensus_45661	consensus_45663	consensus_45666	consensus_45671	consensus_45674	consensus_45682	consensus_45684	consensus_45686	consensus_45689	consensus_45696	consensus_45709	consensus_45711	consensus_45716	consensus_45733	consensus_45739	consensus_45740	consensus_45741	consensus_45747	consensus_45750	consensus_45751	consensus_45753	consensus_45761	consensus_45765	consensus_45769	consensus_45782	consensus_45785	consensus_45791	consensus_45793	consensus_45805	consensus_45808	consensus_45817	consensus_45818	consensus_45829	consensus_45830	consensus_45838	consensus_45843	consensus_45858	consensus_45859	consensus_45867	consensus_45871	consensus_45875	consensus_45877	consensus_45881	consensus_45886	consensus_45888	consensus_45889	consensus_45890	consensus_45902	consensus_45903	consensus_45904	consensus_45910	consensus_45911	consensus_45912	consensus_45930	consensus_45933	consensus_45942	consensus_45945	consensus_45950	consensus_45956	consensus_45959	consensus_45967	consensus_45977	consensus_45987	consensus_45994	consensus_45995	consensus_45998	consensus_46003	consensus_46009	consensus_46017	consensus_46020	consensus_46021	consensus_46022	consensus_46025	consensus_46030	consensus_46045	consensus_46057	consensus_46060	consensus_46062	consensus_46064	consensus_46070	consensus_46071	consensus_46082	consensus_46084	consensus_46092	consensus_46094	consensus_46119	consensus_46122	consensus_46124	consensus_46138	consensus_46140	consensus_46142	consensus_46145	consensus_46155	consensus_46168	consensus_46181	consensus_46198	consensus_46213	consensus_46229	consensus_46231	consensus_46232	consensus_46244	consensus_46246	consensus_46257	consensus_46259	consensus_46272	consensus_46274	consensus_46276	consensus_46277	consensus_46280	consensus_46291	consensus_46293	consensus_46296	consensus_46305	consensus_46306	consensus_46311	consensus_46316	consensus_46318	consensus_46322	consensus_46326	consensus_46335	consensus_46341	consensus_46346	consensus_46351	consensus_46356	consensus_46364	consensus_46365	consensus_46366	consensus_46368	consensus_46370	consensus_46379	consensus_46380	consensus_46386	consensus_46399	consensus_46405	consensus_46411	consensus_46417	consensus_46420	consensus_46424	consensus_46425	consensus_46432	consensus_46439	consensus_46445	consensus_46449	consensus_46450	consensus_46451	consensus_46453	consensus_46458	consensus_46462	consensus_46463	consensus_46465	consensus_46471	consensus_46476	consensus_46478	consensus_46481	consensus_46482	consensus_46486	consensus_46489	consensus_46490	consensus_46494	consensus_46500	consensus_46501	consensus_46502	consensus_46505	consensus_46506	consensus_46508	consensus_46513	consensus_46519	consensus_46520	consensus_46521	consensus_46526	consensus_46527	consensus_46528	consensus_46530	consensus_46531	consensus_46535	consensus_46536	consensus_46537	consensus_46538	consensus_46540	consensus_46553	consensus_46554	consensus_46559	consensus_46567	consensus_46571	consensus_46582	consensus_46587	consensus_46591	consensus_46592	consensus_46596	consensus_46613	consensus_46621	consensus_46632	consensus_46642	consensus_46646	consensus_46647	consensus_46655	consensus_46660	consensus_46671	consensus_46676	consensus_46682	consensus_46691	consensus_46692	consensus_46699	consensus_46700	consensus_46705	consensus_46712	consensus_46714	consensus_46716	consensus_46718	consensus_46719	consensus_46722	consensus_46727	consensus_46728	consensus_46731	consensus_46733	consensus_46735	consensus_46742	consensus_46744	consensus_46752	consensus_46755	consensus_46758	consensus_46759	consensus_46760	consensus_46762	consensus_46763	consensus_46764	consensus_46783	consensus_46787	consensus_46793	consensus_46797	consensus_46800	consensus_46802	consensus_46809	consensus_46828	consensus_46834	consensus_46836	consensus_46839	consensus_46842	consensus_46844	consensus_46852	consensus_46856	consensus_46859	consensus_46862	consensus_46872	consensus_46887	consensus_46894	consensus_46896	consensus_46903	consensus_46909	consensus_46914	consensus_46917	consensus_46920	consensus_46930	consensus_46935	consensus_46940	consensus_46944	consensus_46946	consensus_46947	consensus_46952	consensus_46953	consensus_46954	consensus_46960	consensus_46967	consensus_46971	consensus_46977	consensus_46983	consensus_46984	consensus_46988	consensus_46993	consensus_46995	consensus_47006	consensus_47013	consensus_47014	consensus_47017	consensus_47034	consensus_47040	consensus_47048	consensus_47049	consensus_47072	consensus_47076	consensus_47082	consensus_47086	consensus_47095	consensus_47097	consensus_47104	consensus_47106	consensus_47118	consensus_47119	consensus_47125	consensus_47133	consensus_47136	consensus_47143	consensus_47146	consensus_47149	consensus_47150	consensus_47151	consensus_47155	consensus_47162	consensus_47180	consensus_47181	consensus_47182	consensus_47183	consensus_47193	consensus_47198	consensus_47201	consensus_47209	consensus_47215	consensus_47218	consensus_47227	consensus_47229	consensus_47233	consensus_47242	consensus_47247	consensus_47254	consensus_47260	consensus_47262	consensus_47267	consensus_47271	consensus_47276	consensus_47286	consensus_47288	consensus_47290	consensus_47292	consensus_47300	consensus_47304	consensus_47310	consensus_47330	consensus_47331	consensus_47333	consensus_47341	consensus_47344	consensus_47350	consensus_47370	consensus_47378	consensus_47383	consensus_47384	consensus_47390	consensus_47399	consensus_47400	consensus_47401	consensus_47432	consensus_47441	consensus_47449	consensus_47450	consensus_47457	consensus_47460	consensus_47470	consensus_47471	consensus_47472	consensus_47476	consensus_47506	consensus_47507	consensus_47508	consensus_47514	consensus_47517	consensus_47520	consensus_47523	consensus_47525	consensus_47530	consensus_47534	consensus_47545	consensus_47571	consensus_47578	consensus_47580	consensus_47585	consensus_47590	consensus_47599	consensus_47610	consensus_47617	consensus_47621	consensus_47632	consensus_47636	consensus_47637	consensus_47649	consensus_47662	consensus_47668	consensus_47670	consensus_47671	consensus_47673	consensus_47676	consensus_47684	consensus_47698	consensus_47701	consensus_47702	consensus_47708	consensus_47717	consensus_47719	consensus_47720	consensus_47721	consensus_47727	consensus_47747	consensus_47753	consensus_47756	consensus_47769	consensus_47774	consensus_47779	consensus_47780	consensus_47786	consensus_47791	consensus_47800	consensus_47807	consensus_47808	consensus_47809	consensus_47811	consensus_47820	consensus_47823	consensus_47827	consensus_47829	consensus_47831	consensus_47838	consensus_47839	consensus_47840	consensus_47842	consensus_47846	consensus_47847	consensus_47850	consensus_47852	consensus_47855	consensus_47872	consensus_47890	consensus_47894	consensus_47923	consensus_47925	consensus_47929	consensus_47933	consensus_47938	consensus_47951	consensus_47953	consensus_47967	consensus_47977	consensus_47981	consensus_47983	consensus_47989	consensus_47991	consensus_47995	consensus_48003	consensus_48004	consensus_48031	consensus_48032	consensus_48035	consensus_48042	consensus_48055	consensus_48057	consensus_48060	consensus_48061	consensus_48068	consensus_48069	consensus_48074	consensus_48077	consensus_48081	consensus_48082	consensus_48083	consensus_48088	consensus_48100	consensus_48107	consensus_48112	consensus_48119	consensus_48127	consensus_48131	consensus_48140	consensus_48152	consensus_48156	consensus_48163	consensus_48181	consensus_48183	consensus_48187	consensus_48190	consensus_48191	consensus_48193	consensus_48194	consensus_48196	consensus_48201	consensus_48214	consensus_48221	consensus_48223	consensus_48229	consensus_48230	consensus_48239	consensus_48242	consensus_48243	consensus_48245	consensus_48246	consensus_48250	consensus_48257	consensus_48259	consensus_48265	consensus_48266	consensus_48268	consensus_48270	consensus_48273	consensus_48275	consensus_48276	consensus_48277	consensus_48278	consensus_48279	consensus_48283	consensus_48287	consensus_48293	consensus_48296	consensus_48298	consensus_48302	consensus_48318	consensus_48326	consensus_48328	consensus_48333	consensus_48336	consensus_48337	consensus_48338	consensus_48344	consensus_48349	consensus_48352	consensus_48353	consensus_48377	consensus_48383	consensus_48387	consensus_48408	consensus_48414	consensus_48416	consensus_48417	consensus_48430	consensus_48433	consensus_48436	consensus_48445	consensus_48447	consensus_48448	consensus_48464	consensus_48470	consensus_48476	consensus_48480	consensus_48492	consensus_48493	consensus_48495	consensus_48503	consensus_48504	consensus_48510	consensus_48512	consensus_48514	consensus_48516	consensus_48519	consensus_48522	consensus_48531	consensus_48539	consensus_48552	consensus_48554	consensus_48570	consensus_48572	consensus_48579	consensus_48583	consensus_48584	consensus_48587	consensus_48597	consensus_48600	consensus_48601	consensus_48603	consensus_48605	consensus_48611	consensus_48612	consensus_48616	consensus_48618	consensus_48624	consensus_48626	consensus_48630	consensus_48632	consensus_48640	consensus_48647	consensus_48649	consensus_48651	consensus_48664	consensus_48667	consensus_48682	consensus_48688	consensus_48707	consensus_48708	consensus_48712	consensus_48722	consensus_48735	consensus_48738	consensus_48741	consensus_48752	consensus_48755	consensus_48757	consensus_48763	consensus_48768	consensus_48769	consensus_48772	consensus_48774	consensus_48776	consensus_48777	consensus_48779	consensus_48784	consensus_48785	consensus_48791	consensus_48796	consensus_48801	consensus_48802	consensus_48820	consensus_48824	consensus_48835	consensus_48855	consensus_48869	consensus_48877	consensus_48880	consensus_48883	consensus_48886	consensus_48891	consensus_48900	consensus_48901	consensus_48902	consensus_48907	consensus_48944	consensus_48945	consensus_48949	consensus_48952	consensus_48956	consensus_48959	consensus_48962	consensus_48975	consensus_48976	consensus_48979	consensus_48980	consensus_48991	consensus_49005	consensus_49006	consensus_49010	consensus_49013	consensus_49016	consensus_49029	consensus_49030	consensus_49041	consensus_49048	consensus_49050	consensus_49068	consensus_49073	consensus_49075	consensus_49076	consensus_49078	consensus_49082	consensus_49098	consensus_49102	consensus_49123	consensus_49127	consensus_49131	consensus_49142	consensus_49144	consensus_49148	consensus_49154	consensus_49156	consensus_49157	consensus_49164	consensus_49167	consensus_49172	consensus_49189	consensus_49196	consensus_49208	consensus_49214	consensus_49219	consensus_49225	consensus_49230	consensus_49231	consensus_49252	consensus_49255	consensus_49270	consensus_49272	consensus_49281	consensus_49284	consensus_49288	consensus_49302	consensus_49304	consensus_49308	consensus_49312	consensus_49316	consensus_49319	consensus_49338	consensus_49339	consensus_49356	consensus_49359	consensus_49374	consensus_49375	consensus_49383	consensus_49384	consensus_49394	consensus_49395	consensus_49401	consensus_49412	consensus_49419	consensus_49423	consensus_49424	consensus_49434	consensus_49437	consensus_49448	consensus_49450	consensus_49460	consensus_49468	consensus_49470	consensus_49472	consensus_49481	consensus_49488	consensus_49493	consensus_49505	consensus_49511	consensus_49512	consensus_49518	consensus_49526	consensus_49527	consensus_49541	consensus_49566	consensus_49571	consensus_49574	consensus_49600	consensus_49603	consensus_49607	consensus_49609	consensus_49613	consensus_49618	consensus_49627	consensus_49628	consensus_49632	consensus_49637	consensus_49646	consensus_49657	consensus_49660	consensus_49664	consensus_49668	consensus_49670	consensus_49675	consensus_49679	consensus_49684	consensus_49688	consensus_49690	consensus_49691	consensus_49692	consensus_49699	consensus_49708	consensus_49714	consensus_49717	consensus_49727	consensus_49733	consensus_49738	consensus_49743	consensus_49746	consensus_49753	consensus_49759	consensus_49762	consensus_49778	consensus_49783	consensus_49786	consensus_49787	consensus_49797	consensus_49798	consensus_49812	consensus_49813	consensus_49814	consensus_49818	consensus_49825	consensus_49838	consensus_49842	consensus_49846	consensus_49855	consensus_49858	consensus_49862	consensus_49863	consensus_49870	consensus_49874	consensus_49880	consensus_49882	consensus_49887	consensus_49897	consensus_49902	consensus_49903	consensus_49915	consensus_49930	consensus_49932	consensus_49934	consensus_49935	consensus_49942	consensus_49945	consensus_49947	consensus_49950	consensus_49956	consensus_49970	consensus_49971	consensus_49972	consensus_49979	consensus_49989	consensus_50006	consensus_50007	consensus_50015	consensus_50018	consensus_50020	consensus_50027	consensus_50028	consensus_50033	consensus_50037	consensus_50038	consensus_50040	consensus_50043	consensus_50064	consensus_50069	consensus_50079	consensus_50083	consensus_50095	consensus_50096	consensus_50105	consensus_50106	consensus_50117	consensus_50120	consensus_50121	consensus_50128	consensus_50131	consensus_50136	consensus_50148	consensus_50150	consensus_50164	consensus_50167	consensus_50184	consensus_50190	consensus_50198	consensus_50202	consensus_50217	consensus_50228	consensus_50230	consensus_50238	consensus_50243	consensus_50244	consensus_50245	consensus_50255	consensus_50276	consensus_50278	consensus_50286	consensus_50291	consensus_50297	consensus_50302	consensus_50316	consensus_50325	consensus_50329	consensus_50334	consensus_50339	consensus_50345	consensus_50356	consensus_50357	consensus_50358	consensus_50373	consensus_50377	consensus_50399	consensus_50403	consensus_50413	consensus_50415	consensus_50437	consensus_50446	consensus_50458	consensus_50459	consensus_50470	consensus_50471	consensus_50472	consensus_50473	consensus_50482	consensus_50483	consensus_50489	consensus_50492	consensus_50497	consensus_50507	consensus_50511	consensus_50513	consensus_50529	consensus_50534	consensus_50540	consensus_50541	consensus_50552	consensus_50553	consensus_50585	consensus_50586	consensus_50591	consensus_50600	consensus_50601	consensus_50604	consensus_50608	consensus_50610	consensus_50614	consensus_50617	consensus_50618	consensus_50621	consensus_50622	consensus_50625	consensus_50628	consensus_50648	consensus_50656	consensus_50678	consensus_50682	consensus_50693	consensus_50709	consensus_50716	consensus_50724	consensus_50730	consensus_50739	consensus_50740	consensus_50746	consensus_50748	consensus_50757	consensus_50766	consensus_50770	consensus_50774	consensus_50788	consensus_50792	consensus_50795	consensus_50796	consensus_50810	consensus_50811	consensus_50815	consensus_50828	consensus_50830	consensus_50832	consensus_50837	consensus_50845	consensus_50847	consensus_50848	consensus_50854	consensus_50878	consensus_50879	consensus_50889	consensus_50907	consensus_50915	consensus_50917	consensus_50924	consensus_50938	consensus_50939	consensus_50945	consensus_50963	consensus_50965	consensus_50973	consensus_50979	consensus_50981	consensus_50982	consensus_50987	consensus_50993	consensus_50994	consensus_51000	consensus_51005	consensus_51010	consensus_51017	consensus_51035	consensus_51059	consensus_51060	consensus_51062	consensus_51063	consensus_51068	consensus_51072	consensus_51076	consensus_51080	consensus_51094	consensus_51097	consensus_51101	consensus_51105	consensus_51110	consensus_51114	consensus_51118	consensus_51126	consensus_51128	consensus_51138	consensus_51148	consensus_51154	consensus_51157	consensus_51158	consensus_51166	consensus_51185	consensus_51196	consensus_51197	consensus_51215	consensus_51219	consensus_51221	consensus_51223	consensus_51249	consensus_51256	consensus_51260	consensus_51274	consensus_51279	consensus_51280	consensus_51295	consensus_51297	consensus_51301	consensus_51302	consensus_51325	consensus_51326	consensus_51336	consensus_51350	consensus_51363	consensus_51377	consensus_51425	consensus_51438	consensus_51445	consensus_51457	consensus_51458	consensus_51460	consensus_51470	consensus_51480	consensus_51500	consensus_51502	consensus_51514	consensus_51520	consensus_51527	consensus_51529	consensus_51533	consensus_51538	consensus_51577	consensus_51584	consensus_51586	consensus_51602	consensus_51604	consensus_51605	consensus_51627	consensus_51644	consensus_51645	consensus_51655	consensus_51658	consensus_51662	consensus_51666	consensus_51668	consensus_51670	consensus_51677	consensus_51682	consensus_51732	consensus_51735	consensus_51747	consensus_51752	consensus_51763	consensus_51778	consensus_51779	consensus_51785	consensus_51787	consensus_51806	consensus_51809	consensus_51852	consensus_51853	consensus_51885	consensus_51915	consensus_51918	consensus_51921	consensus_51929	consensus_51935	consensus_51948	consensus_51995	consensus_52003	consensus_52015	consensus_52027	consensus_52030	consensus_52031	consensus_52033	consensus_52045	consensus_52064	consensus_52073	consensus_52084	consensus_52087	consensus_52114	consensus_52115	consensus_52117	consensus_52121	consensus_52127	consensus_52134	consensus_52148	consensus_52155	consensus_52163	consensus_52166	consensus_52170	consensus_52174	consensus_52189	consensus_52209	consensus_52225	consensus_52230	consensus_52259	consensus_52266	consensus_52293	consensus_52297	consensus_52300	consensus_52303	consensus_52307	consensus_52319	consensus_52320	consensus_52342	consensus_52348	consensus_52351	consensus_52353	consensus_52397	consensus_52399	consensus_52414	consensus_52417	consensus_52425	consensus_52434	consensus_52437	consensus_52448	consensus_52456	consensus_52470	consensus_52479	consensus_52568	consensus_52570	consensus_52576	consensus_52584	consensus_52589	consensus_52609	consensus_52657	consensus_52658	consensus_52665	consensus_52669	consensus_52679	consensus_52695	consensus_52717	consensus_52742	consensus_52744	consensus_52748	consensus_52758	consensus_52759	consensus_52765	consensus_52771	consensus_52774	consensus_52786	consensus_52798	consensus_52817	consensus_52828	consensus_52833	consensus_52845	consensus_52846	consensus_52853	consensus_52883	consensus_52885	consensus_52896	consensus_52909	consensus_52914	consensus_52932	consensus_52939	consensus_52955	consensus_52999	consensus_53025	consensus_53052	consensus_53053	consensus_53059	consensus_53064	consensus_53066	consensus_53068	consensus_53093	consensus_53102	consensus_53105	consensus_53135	consensus_53145	consensus_53153	consensus_53160	consensus_53204	consensus_53206	consensus_53210	consensus_53211	consensus_53212	consensus_53216	consensus_53221	consensus_53234	consensus_53241	consensus_53260	consensus_53276	consensus_53295	consensus_53296	consensus_53315	consensus_53326	consensus_53345	consensus_53351	consensus_53374	consensus_53377	consensus_53379	consensus_53393	consensus_53420	consensus_53430	consensus_53432	consensus_53451	consensus_53468	consensus_53472	consensus_53474	consensus_53484	consensus_53500	consensus_53503	consensus_53507	consensus_53522	consensus_53528	consensus_53530	consensus_53537	consensus_53553	consensus_53565	consensus_53579	consensus_53601	consensus_53604	consensus_53610	consensus_53624	consensus_53634	consensus_53663	consensus_53668	consensus_53677	consensus_53688	consensus_53703	consensus_53713	consensus_53722	consensus_53740	consensus_53753	consensus_53769	consensus_53770	consensus_53773	consensus_53780	consensus_53793	consensus_53797	consensus_53802	consensus_53803	consensus_53825	consensus_53842	consensus_53862	consensus_53880	consensus_53882	consensus_53893	consensus_53904	consensus_53907	consensus_53909	consensus_53913	consensus_53928	consensus_53929	consensus_53936	consensus_53948	consensus_53976	consensus_53984	consensus_53986	consensus_54021	consensus_54026	consensus_54029	consensus_54036	consensus_54038	consensus_54056	consensus_54066	consensus_54079	consensus_54083	consensus_54102	consensus_54106	consensus_54115	consensus_54156	consensus_54180	consensus_54183	consensus_54186	consensus_54189	consensus_54190	consensus_54193	consensus_54231	consensus_54253	consensus_54270	consensus_54272	consensus_54299	consensus_54328	consensus_54331	consensus_54348	consensus_54352	consensus_54366	consensus_54395	consensus_54399	consensus_54406	consensus_54430	consensus_54441	consensus_54443	consensus_54450	consensus_54458	consensus_54461	consensus_54468	consensus_54481	consensus_54500	consensus_54529	consensus_54532	consensus_54535	consensus_54538	consensus_54544	consensus_54546	consensus_54547	consensus_54570	consensus_54582	consensus_54590	consensus_54597	consensus_54600	consensus_54612	consensus_54638	consensus_54662	consensus_54680	consensus_54698	consensus_54723	consensus_54724	consensus_54730	consensus_54731	consensus_54737	consensus_54743	consensus_54754	consensus_54764	consensus_54771	consensus_54776	consensus_54793	consensus_54795	consensus_54806	consensus_54808	consensus_54827	consensus_54848	consensus_54860	consensus_54872	consensus_54896	consensus_54900	consensus_54904	consensus_54919	consensus_54927	consensus_54929	consensus_54951	consensus_54952	consensus_54955	consensus_55021	consensus_55024	consensus_55025	consensus_55049	consensus_55057	consensus_55075	consensus_55077	consensus_55083	consensus_55090	consensus_55091	consensus_55093	consensus_55099	consensus_55118	consensus_55119	consensus_55126	consensus_55166	consensus_55167	consensus_55176	consensus_55186	consensus_55198	consensus_55201	consensus_55244	consensus_55258	consensus_55315	consensus_55360	consensus_55361	consensus_55388	consensus_55392	consensus_55393	consensus_55395	consensus_55402	consensus_55416	consensus_55417	consensus_55430	consensus_55450	consensus_55456	consensus_55458	consensus_55473	consensus_55496	consensus_55515	consensus_55533	consensus_55535	consensus_55545	consensus_55562	consensus_55624	consensus_55628	consensus_55653	consensus_55681	consensus_55686	consensus_55721	consensus_55736	consensus_55739	consensus_55751	consensus_55762	consensus_55783	consensus_55810	consensus_55840	consensus_55842	consensus_55857	consensus_55881	consensus_55890	consensus_55907	consensus_55911	consensus_55917	consensus_55925	consensus_55936	consensus_55942	consensus_55948	consensus_55956	consensus_55961	consensus_55966	consensus_56001	consensus_56010	consensus_56021	consensus_56034	consensus_56044	consensus_56054	consensus_56057	consensus_56061	consensus_56094	consensus_56114	consensus_56129	consensus_56154	consensus_56160	consensus_56184	consensus_56199	consensus_56218	consensus_56235	consensus_56243	consensus_56255	consensus_56266	consensus_56268	consensus_56278	consensus_56307	consensus_56309	consensus_56316	consensus_56340	consensus_56350	consensus_56370	consensus_56397	consensus_56407	consensus_56410	consensus_56425	consensus_56441	consensus_56459	consensus_56467	consensus_56473	consensus_56518	consensus_56529	consensus_56533	consensus_56534	consensus_56540	consensus_56557	consensus_56561	consensus_56565	consensus_56576	consensus_56577	consensus_56585	consensus_56589	consensus_56610	consensus_56621	consensus_56622	consensus_56625	consensus_56633	consensus_56645	consensus_56652	consensus_56657	consensus_56668	consensus_56671	consensus_56672	consensus_56677	consensus_56693	consensus_56702	consensus_56715	consensus_56719	consensus_56730	consensus_56739	consensus_56746	consensus_56755	consensus_56768	consensus_56771	consensus_56779	consensus_56791	consensus_56815	consensus_56830	consensus_56835	consensus_56850	consensus_56858	consensus_56864	consensus_56881	consensus_56896	consensus_56905	consensus_56955	consensus_56973	consensus_57005	consensus_57017	consensus_57020	consensus_57031	consensus_57039	consensus_57052	consensus_57067	consensus_57071	consensus_57092	consensus_57121	consensus_57129	consensus_57149	consensus_57151	consensus_57155	consensus_57160	consensus_57162	consensus_57164	consensus_57181	consensus_57188	consensus_57192	consensus_57196	consensus_57200	consensus_57205	consensus_57210	consensus_57215	consensus_57229	consensus_57260	consensus_57282	consensus_57297	consensus_57341	consensus_57360	consensus_57361	consensus_57369	consensus_57371	consensus_57398	consensus_57423	consensus_57433	consensus_57439	consensus_57446	consensus_57451	consensus_57467	consensus_57500	consensus_57506	consensus_57514	consensus_57523	consensus_57531	consensus_57545	consensus_57552	consensus_57561	consensus_57564	consensus_57570	consensus_57600	consensus_57615	consensus_57635	consensus_57670	consensus_57676	consensus_57682	consensus_57693	consensus_57694	consensus_57697	consensus_57714	consensus_57720	consensus_57745	consensus_57757	consensus_57758	consensus_57784	consensus_57793	consensus_57794	consensus_57837	consensus_57855	consensus_57873	consensus_57879	consensus_57883	consensus_57885	consensus_57892	consensus_57903	consensus_57924	consensus_57948	consensus_57949	consensus_57953	consensus_57959	consensus_57976	consensus_57984	consensus_57991	consensus_58012	consensus_58021	consensus_58038	consensus_58065	consensus_58092	consensus_58095	consensus_58106	consensus_58118	consensus_58125	consensus_58129	consensus_58130	consensus_58131	consensus_58136	consensus_58149	consensus_58156	consensus_58184	consensus_58188	consensus_58196	consensus_58203	consensus_58213	consensus_58243	consensus_58247	consensus_58251	consensus_58255	consensus_58256	consensus_58297	consensus_58306	consensus_58310	consensus_58313	consensus_58318	consensus_58325	consensus_58353	consensus_58381	consensus_58383	consensus_58396	consensus_58398	consensus_58400	consensus_58402	consensus_58404	consensus_58409	consensus_58443	consensus_58447	consensus_58464	consensus_58469	consensus_58491	consensus_58514	consensus_58516	consensus_58521	consensus_58554	consensus_58559	consensus_58566	consensus_58570	consensus_58580	consensus_58596	consensus_58608	consensus_58615	consensus_58618	consensus_58620	consensus_58627	consensus_58630	consensus_58637	consensus_58655	consensus_58662	consensus_58675	consensus_58688	consensus_58691	consensus_58699	consensus_58708	consensus_58742	consensus_58752	consensus_58754	consensus_58774	consensus_58781	consensus_58783	consensus_58792	consensus_58808	consensus_58825	consensus_58829	consensus_58843	consensus_58857	consensus_58862	consensus_58882	consensus_58893	consensus_58908	consensus_58929	consensus_58934	consensus_58986	consensus_58994	consensus_59032	consensus_59035	consensus_59045	consensus_59059	consensus_59069	consensus_59074	consensus_59075	consensus_59081	consensus_59082	consensus_59084	consensus_59085	consensus_59108	consensus_59132	consensus_59149	consensus_59166	consensus_59188	consensus_59195	consensus_59218	consensus_59230	consensus_59259	consensus_59264	consensus_59270	consensus_59288	consensus_59297	consensus_59301	consensus_59305	consensus_59331	consensus_59336	consensus_59337	consensus_59356	consensus_59386	consensus_59389	consensus_59410	consensus_59414	consensus_59443	consensus_59459	consensus_59470	consensus_59483	consensus_59486	consensus_59491	consensus_59498	consensus_59501	consensus_59508	consensus_59514	consensus_59535	consensus_59539	consensus_59541	consensus_59559	consensus_59571	consensus_59584	consensus_59597	consensus_59606	consensus_59631	consensus_59633	consensus_59654	consensus_59660	consensus_59672	consensus_59684	consensus_59685	consensus_59693	consensus_59761	consensus_59765	consensus_59792	consensus_59800	consensus_59812	consensus_59824	consensus_59835	consensus_59876	consensus_59889	consensus_59924	consensus_59932	consensus_59937	consensus_59948	consensus_59979	consensus_59984	consensus_59991	consensus_60007	consensus_60022	consensus_60074	consensus_60079	consensus_60094	consensus_60099	consensus_60102	consensus_60106	consensus_60110	consensus_60114	consensus_60135	consensus_60152	consensus_60166	consensus_60170	consensus_60173	consensus_60175	consensus_60210	consensus_60230	consensus_60241	consensus_60242	consensus_60252	consensus_60310	consensus_60338	consensus_60389	consensus_60409	consensus_60440	consensus_60452	consensus_60454	consensus_60470	consensus_60480	consensus_60506	consensus_60538	consensus_60549	consensus_60550	consensus_60555	consensus_60585	consensus_60595	consensus_60603	consensus_60624	consensus_60626	consensus_60672	consensus_60688	consensus_60695	consensus_60700	consensus_60712	consensus_60722	consensus_60773	consensus_60778	consensus_60794	consensus_60810	consensus_60821	consensus_60823	consensus_60847	consensus_60859	consensus_60876	consensus_60885	consensus_60902	consensus_60915	consensus_60917	consensus_60919	consensus_60939	consensus_60940	consensus_60971	consensus_60972	consensus_60978	consensus_60995	consensus_61002	consensus_61012	consensus_61016	consensus_61039	consensus_61050	consensus_61054	consensus_61063	consensus_61119	consensus_61200	consensus_61257	consensus_61264	consensus_61280	consensus_61286	consensus_61292	consensus_61314	consensus_61324	consensus_61333	consensus_61335	consensus_61345	consensus_61409	consensus_61414	consensus_61416	consensus_61418	consensus_61423	consensus_61444	consensus_61453	consensus_61459	consensus_61461	consensus_61466	consensus_61469	consensus_61479	consensus_61481	consensus_61515	consensus_61556	consensus_61558	consensus_61569	consensus_61627	consensus_61645	consensus_61649	consensus_61669	consensus_61678	consensus_61701	consensus_61724	consensus_61738	consensus_61745	consensus_61816	consensus_61827	consensus_61861	consensus_61871	consensus_61872	consensus_61879	consensus_61890	consensus_61901	consensus_61902	consensus_61913	consensus_61918	consensus_61991	consensus_61997	consensus_62001	consensus_62008	consensus_62048	consensus_62062	consensus_62083	consensus_62144	consensus_62145	consensus_62155	consensus_62164	consensus_62186	consensus_62192	consensus_62194	consensus_62221	consensus_62237	consensus_62238	consensus_62242	consensus_62255	consensus_62256	consensus_62275	consensus_62323	consensus_62338	consensus_62350	consensus_62393	consensus_62440	consensus_62442	consensus_62471	consensus_62499	consensus_62501	consensus_62511	consensus_62517	consensus_62521	consensus_62523	consensus_62534	consensus_62559	consensus_62569	consensus_62592	consensus_62652	consensus_62658	consensus_62660	consensus_62691	consensus_62714	consensus_62732	consensus_62736	consensus_62755	consensus_62759	consensus_62786	consensus_62798	consensus_62799	consensus_62816	consensus_62849	consensus_62862	consensus_62880	consensus_62887	consensus_62894	consensus_62896	consensus_62916	consensus_62923	consensus_62931	consensus_62941	consensus_62946	consensus_62994	consensus_63026	consensus_63034	consensus_63039	consensus_63084	consensus_63092	consensus_63093	consensus_63094	consensus_63160	consensus_63161	consensus_63167	consensus_63169	consensus_63186	consensus_63223	consensus_63243	consensus_63262	consensus_63264	consensus_63266	consensus_63286	consensus_63290	consensus_63297	consensus_63298	consensus_63312	consensus_63314	consensus_63359	consensus_63372	consensus_63390	consensus_63421	consensus_63445	consensus_63463	consensus_63483	consensus_63485	consensus_63489	consensus_63525	consensus_63533	consensus_63546	consensus_63583	consensus_63600	consensus_63640	consensus_63679	consensus_63696	consensus_63701	consensus_63714	consensus_63730	consensus_63737	consensus_63757	consensus_63771	consensus_63807	consensus_63823	consensus_63894	consensus_63902	consensus_63912	consensus_63928	consensus_63933	consensus_64004	consensus_64053	consensus_64055	consensus_64057	consensus_64090	consensus_64123	consensus_64125	consensus_64180	consensus_64195	consensus_64198	consensus_64201	consensus_64202	consensus_64239	consensus_64247	consensus_64267	consensus_64273	consensus_64277	consensus_64284	consensus_64303	consensus_64381	consensus_64491	consensus_64492	consensus_64495	consensus_64532	consensus_64554	consensus_64624	consensus_64628	consensus_64633	consensus_64680	consensus_64688	consensus_64700	consensus_64741	consensus_64773	consensus_64780	consensus_64785	consensus_64812	consensus_64826	consensus_64827	consensus_64829	consensus_64863	consensus_64912	consensus_64918	consensus_64934	consensus_64986	consensus_64996	consensus_65004	consensus_65017	consensus_65039	consensus_65055	consensus_65078	consensus_65105	consensus_65115	consensus_65177	consensus_65188	consensus_65198	consensus_65220	consensus_65310	consensus_65315	consensus_65322	consensus_65364	consensus_65400	consensus_65405	consensus_65424	consensus_65471	consensus_65521	consensus_65544	consensus_65552	consensus_65574	consensus_65589	consensus_65597	consensus_65609	consensus_65635	consensus_65647	consensus_65649	consensus_65661	consensus_65667	consensus_65672	consensus_65688	consensus_65731	consensus_65780	consensus_65792	consensus_65815	consensus_65896	consensus_65910	consensus_65932	consensus_65968	consensus_65969	consensus_65971	consensus_65998	consensus_66064	consensus_66068	consensus_66071	consensus_66128	consensus_66144	consensus_66159	consensus_66179	consensus_66196	consensus_66197	consensus_66216	consensus_66263	consensus_66291	consensus_66315	consensus_66322	consensus_66334	consensus_66382	consensus_66438	consensus_66451	consensus_66455	consensus_66456	consensus_66571	consensus_66611	consensus_66613	consensus_66634	consensus_66676	consensus_66710	consensus_66724	consensus_66732	consensus_66738	consensus_66750	consensus_66762	consensus_66766	consensus_66778	consensus_66794	consensus_66797	consensus_66812	consensus_66813	consensus_66815	consensus_66854	consensus_66869	consensus_66893	consensus_66899	consensus_66916	consensus_66917	consensus_66922	consensus_66961	consensus_66989	consensus_66995	consensus_67022	consensus_67027	consensus_67035	consensus_67089	consensus_67126	consensus_67145	consensus_67174	consensus_67177	consensus_67199	consensus_67217	consensus_67230	consensus_67263	consensus_67270	consensus_67280	consensus_67284	consensus_67299	consensus_67303	consensus_67309	consensus_67320	consensus_67334	consensus_67406	consensus_67408	consensus_67423	consensus_67431	consensus_67433	consensus_67441	consensus_67477	consensus_67478	consensus_67521	consensus_67564	consensus_67590	consensus_67609	consensus_67613	consensus_67621	consensus_67622	consensus_67647	consensus_67677	consensus_67697	consensus_67699	consensus_67709	consensus_67714	consensus_67765	consensus_67780	consensus_67807	consensus_67813	consensus_67883	consensus_67885	consensus_67913	consensus_67977	consensus_68029	consensus_68086	consensus_68096	consensus_68103	consensus_68107	consensus_68150	consensus_68201	consensus_68214	consensus_68278	consensus_68280	consensus_68283	consensus_68293	consensus_68319	consensus_68321	consensus_68323	consensus_68327	consensus_68347	consensus_68351	consensus_68360	consensus_68366	consensus_68397	consensus_68399	consensus_68417	consensus_68418	consensus_68451	consensus_68452	consensus_68480	consensus_68498	consensus_68505	consensus_68596	consensus_68659	consensus_68673	consensus_68679	consensus_68693	consensus_68696	consensus_68708	consensus_68736	consensus_68751	consensus_68754	consensus_68763	consensus_68843	consensus_68844	consensus_68871	consensus_68891	consensus_68910	consensus_68939	consensus_68943	consensus_68964	consensus_68975	consensus_69005	consensus_69016	consensus_69017	consensus_69022	consensus_69059	consensus_69105	consensus_69118	consensus_69178	consensus_69185	consensus_69189	consensus_69241	consensus_69278	consensus_69290	consensus_69334	consensus_69382	consensus_69386	consensus_69401	consensus_69408	consensus_69419	consensus_69456	consensus_69538	consensus_69547	consensus_69592	consensus_69605	consensus_69618	consensus_69688	consensus_69697	consensus_69710	consensus_69762	consensus_69784	consensus_69795	consensus_69806	consensus_69833	consensus_69860	consensus_69890	consensus_69906	consensus_69950	consensus_69982	consensus_69986	consensus_70012	consensus_70023	consensus_70030	consensus_70033	consensus_70034	consensus_70058	consensus_70110	consensus_70137	consensus_70185	consensus_70227	consensus_70234	consensus_70269	consensus_70310	consensus_70350	consensus_70388	consensus_70424	consensus_70445	consensus_70448	consensus_70548	consensus_70556	consensus_70563	consensus_70565	consensus_70605	consensus_70607	consensus_70610	consensus_70611	consensus_70690	consensus_70713	consensus_70720	consensus_70765	consensus_70771	consensus_70841	consensus_70895	consensus_70941	consensus_70960	consensus_70968	consensus_71019	consensus_71032	consensus_71039	consensus_71066	consensus_71111	consensus_71148	consensus_71170	consensus_71185	consensus_71258	consensus_71303	consensus_71306	consensus_71314	consensus_71321	consensus_71326	consensus_71336	consensus_71390	consensus_71401	consensus_71463	consensus_71491	consensus_71501	consensus_71510	consensus_71521	consensus_71523	consensus_71550	consensus_71582	consensus_71639	consensus_71681	consensus_71777	consensus_71813	consensus_71839	consensus_71972	consensus_72062	consensus_72093	consensus_72101	consensus_72112	consensus_72124	consensus_72165	consensus_72172	consensus_72192	consensus_72224	consensus_72261	consensus_72264	consensus_72278	consensus_72316	consensus_72333	consensus_72348	consensus_72371	consensus_72376	consensus_72400	consensus_72431	consensus_72503	consensus_72603	consensus_72631	consensus_72652	consensus_72665	consensus_72666	consensus_72682	consensus_72863	consensus_72913	consensus_72926	consensus_72945	consensus_72955	consensus_72972	consensus_72996	consensus_73007	consensus_73066	consensus_73288	consensus_73324	consensus_73357	consensus_73409	consensus_73432	consensus_73507	consensus_73615	consensus_73704	consensus_73705	consensus_73852	consensus_73884	consensus_73950	consensus_73958	consensus_74038	consensus_74039	consensus_74040	consensus_74062	consensus_74090	consensus_74168	consensus_74218	consensus_74228	consensus_74350	consensus_74527	consensus_74582	consensus_74613	consensus_74896	consensus_74906	consensus_75193	consensus_75425	consensus_75487	consensus_75643	consensus_75669	consensus_75752	consensus_75796	consensus_75868	consensus_75972	consensus_76114	consensus_76138	consensus_76190	consensus_76291	consensus_76310	consensus_76316	consensus_76336	consensus_76498	consensus_76682
1	004.x1.GQI121	800.x1.GQI122	400.x1.GQI122	0	0	1 1	1 1	2 2	1 1	1 2	1 1	1 1	1 2	2 2	2 2	1 1	1 2	2 2	1 1	0 0	1 1	1 2	1 1	1 2	2 2	1 2	1 2	0 0	1 1	2 2	1 1	1 1	2 2	1 2	1 2	1 1	1 1	1 1	1 2	1 1	2 2	2 2	1 2	1 1	1 1	1 1	1 1	1 2	1 1	1 1	1 1	1 1	1 1	2 2	1 2	1 1	1 1	1 1	1 2	1 2	1 2	1 2	1 1	1 2	1 1	1 1	1 2	1 1	2 2	1 2	1 2	1 2	1 1	1 2	1 1	1 1	1 1	1 1	1 1	1 2	1 2	0 0	1 2	1 1	1 2	1 1	0 0	1 1	2 2	1 2	1 2	2 2	1 2	1 2	1 1	1 2	1 2	1 1	1 2	1 1	1 1	2 2	1 1	1 1	1 1	1 2	1 2	0 0	2 2	1 1	1 1	1 2	0 0	1 2	1 1	1 2	1 1	2 2	1 2	2 2	1 1	1 1	1 2	1 1	0 0	1 2	1 2	1 2	1 1	0 0	1 1	1 1	1 2	1 2	1 2	1 2	1 2	1 1	2 2	1 1	1 2	1 1	1 1	1 1	1 2	1 1	2 2	1 1	1 2	1 2	1 2	1 1	1 2	1 1	1 1	1 1	1 1	1 2	1 2	1 1	1 2	1 2	2 2	1 2	1 1	1 2	1 2	1 1	2 2	1 2	1 2	2 2	1 1	1 1	1 2	1 2	1 1	1 1	1 2	1 1	2 2	1 2	1 2	1 1	1 2	1 2	1 2	1 1	0 0	1 2	1 1	1 1	1 1	2 2	1 2	1 1	1 1	1 2	1 2	1 1	2 2	2 2	1 2	1 1	2 2	1 2	1 1	2 2	2 2	1 2	1 2	1 2	1 1	1 1	1 1	1 1	1 1	1 2	1 2	1 1	1 2	2 2	1 1	1 2	1 1	1 1	0 0	1 1	1 1	1 2	1 1	1 2	1 2	1 2	1 1	1 2	1 1	1 1	1 2	1 1	1 1	1 1	1 2	1 2	2 2	1 2	1 2	0 0	1 2	1 2	2 2	1 1	1 1	1 1	1 2	2 2	2 2	1 1	1 1	1 1	1 2	1 2	2 2	1 1	1 2	1 2	1 1	1 2	0 0	2 2	1 1	2 2	1 1	1 1	2 2	2 2	1 1	1 1	0 0	1 2	1 2	1 2	1 2	1 1	1 1	1 2	1 2	1 2	1 1	1 1	1 1	2 2	1 1	1 2	1 2	1 1	1 1	1 1	1 1	1 1	1 1	1 2	1 1	1 2	1 2	1 2	1 2	1 2	1 1	1 2	1 1	1 2	2 2	1 2	1 1	1 1	1 2	1 2	1 1	1 2	1 1	1 2	1 2	2 2	1 1	2 2	1 2	1 2	1 1	1 2	1 2	1 2	1 1	1 2	1 2	1 1	1 2	1 1	1 1	1 2	1 2	1 1	1 2	1 2	1 2	1 2	1 1	1 2	2 2	1 1	1 2	1 1	1 2	1 1	1 1	1 1	1 2	1 1	2 2	1 1	0 0	1 2	1 2	1 1	1 2	1 2	1 1	1 2	1 2	1 1	1 2	1 1	1 2	1 1	1 2	0 0	1 2	1 2	1 1	1 1	2 2	1 1	1 1	1 1	1 2	1 2	2 2	1 2	1 2	1 1	1 1	2 2	1 2	2 2	1 1	1 2	1 2	1 1	1 1	1 1	1 2	1 1	1 2	1 2	1 1	2 2	1 1	1 2	1 2	1 1	1 2	1 2	1 2	1 1	1 1	1 2	1 2	1 1	1 2	1 1	1 2	1 1	1 1	1 2	1 1	1 1	2 2	1 1	1 1	1 2	1 2	1 1	1 1	1 1	1 2	1 1	2 2	0 0	1 2	1 2	1 1	1 1	1 2	1 2	2 2	1 2	1 2	1 2	1 1	1 1	1 1	1 2	1 2	1 1	1 2	1 1	1 1	1 1	2 2	1 1	1 1	2 2	1 1	1 1	1 1	1 2	1 1	1 2	1 2	1 1	1 2	1 1	1 1	1 2	1 1	1 2	1 1	1 2	1 1	1 2	1 1	1 2	2 2	1 1	1 1	1 1	1 2	1 2	2 2	2 2	1 1	1 1	1 2	1 2	1 1	1 1	1 1	2 2	1 1	1 1	1 1	1 1	1 1	1 2	1 1	2 2	1 2	1 2	1 2	1 2	2 2	1 2	2 2	2 2	1 2	1 2	2 2	1 1	1 2	2 2	2 2	1 2	1 2	1 1	1 1	1 1	1 2	1 2	1 1	1 1	2 2	1 1	1 1	1 1	1 2	1 1	1 1	2 2	1 1	1 2	1 1	1 1	1 1	1 1	1 2	2 2	2 2	1 1	1 2	1 2	1 2	0 0	1 1	1 2	1 2	1 1	1 1	1 2	2 2	1 2	1 1	1 1	1 2	2 2	1 1	1 1	1 1	1 2	1 1	1 1	2 2	1 2	1 2	1 1	1 2	1 2	1 1	1 2	0 0	0 0	1 1	1 1	2 2	1 1	1 1	1 1	1 2	1 1	1 1	2 2	2 2	1 1	1 2	1 2	1 2	1 2	1 2	2 2	1 1	1 1	0 0	1 2	1 2	1 2	1 2	1 1	2 2	1 2	2 2	1 2	1 1	1 2	1 2	0 0	1 2	1 1	1 1	1 1	1 2	1 2	1 1	0 0	1 1	1 2	1 2	1 2	1 1	1 1	1 2	1 2	1 1	1 1	1 1	1 2	1 1	1 1	0 0	1 1	1 1	1 1	1 2	1 2	1 1	1 1	1 1	2 2	1 2	1 1	1 2	1 2	0 0	1 1	2 2	1 1	1 1	1 2	2 2	1 1	1 2	1 1	1 1	1 2	1 1	1 2	2 2	1 1	1 1	1 1	1 2	1 1	1 2	1 1	1 1	1 1	1 1	2 2	1 2	1 1	1 1	1 1	1 1	1 1	1 2	1 2	1 2	1 1	1 1	1 2	1 2	2 2	1 2	1 1	2 2	1 1	0 0	1 2	0 0	1 1	2 2	1 1	1 2	1 1	1 2	1 1	2 2	1 1	1 2	1 1	1 2	1 2	1 1	1 1	1 2	1 1	1 2	1 2	1 2	1 1	1 2	1 2	2 2	1 1	1 2	1 1	1 1	2 2	1 2	1 1	0 0	1 1	1 1	1 1	1 2	2 2	1 2	0 0	1 1	1 1	2 2	2 2	2 2	1 2	1 2	1 1	1 2	1 2	0 0	1 1	1 1	1 1	1 1	1 1	1 2	1 2	1 1	1 1	1 1	1 1	1 2	2 2	1 2	1 1	2 2	1 1	1 2	1 1	1 2	1 1	1 2	1 2	1 1	1 2	1 1	1 1	1 1	1 1	2 2	1 2	1 1	1 2	1 1	1 2	1 2	1 2	1 1	1 1	1 1	1 2	1 1	1 2	1 2	1 1	1 2	1 2	1 1	1 1	1 2	1 1	1 1	1 2	1 2	1 1	1 1	1 2	1 2	1 2	2 2	1 2	1 1	1 2	1 2	1 2	1 2	1 1	0 0	1 1	1 2	1 2	1 2	1 2	1 2	1 1	1 1	1 1	1 1	1 1	1 2	1 2	1 1	1 2	1 2	1 1	1 1	2 2	1 2	1 2	1 2	1 1	1 2	1 1	1 2	1 1	1 1	1 2	2 2	2 2	1 2	1 1	1 2	0 0	1 2	2 2	1 2	1 2	2 2	1 2	1 1	1 1	1 1	1 2	1 2	2 2	1 2	2 2	1 1	1 1	1 1	1 1	1 1	1 1	1 2	1 1	1 1	1 2	1 1	1 1	0 0	1 2	2 2	2 2	1 2	1 1	2 2	1 1	2 2	1 2	1 2	1 1	1 2	1 2	1 1	1 2	1 1	1 1	1 2	1 2	1 2	1 1	1 2	2 2	0 0	1 2	1 2	1 1	1 1	0 0	2 2	1 1	1 2	1 2	1 2	1 2	1 2	1 2	1 1	1 2	1 1	1 1	1 2	1 2	1 1	2 2	1 1	1 1	1 2	0 0	1 1	1 2	1 2	1 2	1 2	1 1	1 2	1 1	1 2	1 2	1 1	1 1	1 1	2 2	1 1	1 1	1 2	2 2	1 2	1 1	1 2	1 1	1 2	1 1	1 1	1 2	1 1	1 2	1 2	1 1	1 1	1 1	1 1	0 0	0 0	1 1	1 2	1 2	1 1	1 1	2 2	1 2	1 1	2 2	1 2	1 1	1 1	1 2	1 2	1 1	1 1	1 1	2 2	1 2	1 2	2 2	1 1	0 0	1 1	1 2	1 1	2 2	2 2	1 2	1 1	1 2	1 1	1 2	2 2	1 1	1 1	1 2	1 1	1 1	1 2	1 2	1 2	1 2	1 2	1 2	1 2	0 0	1 1	2 2	1 2	1 2	1 2	2 2	1 2	1 1	1 2	1 2	1 2	1 1	1 2	1 2	1 1	1 1	1 1	1 2	1 1	1 1	0 0	1 1	1 2	1 1	1 2	1 2	1 1	0 0	1 1	1 2	2 2	2 2	1 1	1 2	1 2	1 2	1 2	2 2	1 1	1 1	1 2	1 1	1 1	1 2	1 2	0 0	1 2	1 2	1 1	1 2	1 1	1 1	1 2	1 1	1 1	0 0	1 1	1 1	1 2	1 1	1 2	1 2	1 1	1 2	1 1	1 1	1 1	1 1	1 1	1 1	1 1	1 1	1 2	2 2	1 1	1 2	1 2	1 2	1 1	1 1	1 2	1 2	1 1	1 1	2 2	2 2	1 1	1 1	1 1	0 0	1 1	1 2	1 2	1 1	2 2	1 2	2 2	1 2	1 2	1 1	1 2	1 1	1 2	1 2	2 2	1 1	1 1	1 2	2 2	1 2	1 2	1 2	1 1	1 1	1 1	1 2	1 1	1 1	2 2	1 2	1 1	1 2	1 1	0 0	1 2	1 2	1 2	2 2	1 1	0 0	1 1	1 1	1 1	1 2	1 2	1 2	2 2	1 1	1 1	1 2	1 2	1 2	1 1	1 1	1 1	1 2	2 2	1 2	2 2	0 0	1 1	0 0	1 2	1 2	1 2	1 2	1 1	1 1	1 2	1 2	1 1	1 2	1 1	1 2	1 1	1 1	1 1	1 1	1 1	1 1	1 1	1 2	1 2	1 1	1 1	1 1	1 2	1 1	1 2	1 2	1 1	1 1	1 1	1 2	1 2	1 2	1 1	1 1	1 2	2 2	2 2	1 1	1 2	1 1	1 1	2 2	2 2	1 1	1 1	1 2	1 1	1 1	2 2	1 2	1 2	1 1	1 2	2 2	0 0	1 1	2 2	2 2	1 2	1 2	1 2	1 1	1 1	1 1	1 2	1 1	1 1	1 1	1 2	1 1	2 2	1 2	2 2	1 1	1 2	1 2	1 1	1 2	1 2	1 2	1 2	1 1	1 2	1 1	1 1	1 2	1 1	1 1	1 1	1 1	1 1	1 2	1 1	2 2	1 1	1 2	1 2	1 2	1 1	1 1	2 2	1 1	1 1	1 1	1 1	1 2	1 1	2 2	1 1	1 1	1 2	1 2	1 2	1 1	2 2	1 2	1 1	2 2	1 1	1 1	1 1	1 1	1 1	1 1	1 1	1 2	1 1	1 2	2 2	1 1	1 1	1 2	1 1	1 2	1 2	1 2	2 2	2 2	1 1	1 2	1 1	2 2	1 1	1 2	1 1	1 2	1 1	1 1	1 2	1 1	1 1	1 1	1 1	1 1	1 2	1 2	2 2	1 2	1 1	1 1	1 1	1 1	1 1	1 2	1 2	1 2	1 2	1 1	1 1	1 1	1 2	2 2	1 2	1 1	1 1	1 2	1 2	1 2	1 1	1 1	2 2	0 0	1 1	1 1	1 2	1 1	1 2	1 2	1 1	1 1	1 2	1 2	1 2	1 1	1 1	1 2	1 2	2 2	1 2	1 1	2 2	0 0	1 1	1 2	1 2	1 2	1 1	1 1	1 2	1 2	1 2	1 1	1 2	0 0	2 2	0 0	1 2	1 1	1 2	1 1	1 2	1 2	1 1	2 2	1 1	2 2	1 1	1 1	1 1	0 0	1 1	1 1	1 2	1 2	1 1	2 2	1 1	1 2	2 2	1 2	1 1	2 2	1 1	1 2	1 1	1 1	1 1	1 2	1 2	1 1	1 2	1 2	1 2	1 1	1 1	1 2	1 2	1 1	1 2	1 1	1 2	1 1	1 2	2 2	1 1	1 1	1 2	1 2	1 1	1 2	1 1	1 2	1 2	2 2	1 1	2 2	1 2	1 2	1 2	1 1	1 1	1 2	1 2	1 2	1 1	1 1	1 2	1 2	1 2	1 1	1 1	1 1	1 2	1 1	1 2	0 0	1 1	2 2	1 2	2 2	1 1	1 1	1 1	1 1	1 1	2 2	2 2	1 2	2 2	1 2	2 2	1 2	1 1	1 1	1 1	1 2	1 1	1 2	1 1	1 1	1 1	1 1	1 1	1 2	1 2	2 2	1 2	1 1	1 1	1 1	1 2	1 1	1 2	1 1	1 2	1 1	1 2	1 1	1 2	1 2	1 1	1 1	1 1	1 2	1 2	1 2	1 2	1 1	1 2	1 2	1 2	1 2	1 2	1 2	1 2	1 2	1 1	1 2	1 2	0 0	2 2	2 2	1 2	1 1	2 2	1 2	1 1	1 1	1 2	1 2	1 1	1 1	1 2	1 1	1 1	1 1	1 1	1 1	1 2	1 1	1 2	1 1	1 2	1 1	1 2	1 2	1 2	1 2	2 2	1 2	1 1	1 1	1 2	2 2	1 2	1 2	2 2	1 2	1 1	1 2	1 2	1 1	1 2	1 1	1 1	1 1	1 2	1 1	1 2	1 1	1 1	1 2	1 2	1 2	1 1	1 2	1 2	2 2	1 1	1 1	1 1	0 0	1 2	1 2	1 1	1 2	1 1	1 1	1 1	1 1	1 1	1 2	1 2	1 2	1 1	1 1	1 2	1 1	1 2	1 1	2 2	0 0	1 1	1 2	1 2	1 2	1 1	1 1	1 2	2 2	1 1	1 1	2 2	1 1	2 2	1 1	1 2	2 2	1 2	1 2	1 1	1 2	1 2	1 1	2 2	1 1	1 2	1 1	1 1	1 2	1 1	1 1	1 2	1 2	1 1	1 2	1 2	2 2	0 0	1 1	1 2	1 2	2 2	1 1	1 1	1 2	2 2	1 1	0 0	1 2	1 1	2 2	1 1	1 1	1 1	1 1	1 2	0 0	1 2	1 1	1 2	2 2	1 2	0 0	0 0	1 2	1 1	1 2	2 2	1 1	1 2	1 1	1 2	1 1	1 2	2 2	1 1	1 1	1 2	1 2	1 2	1 2	1 2	1 1	1 2	1 2	1 2	1 1	2 2	1 2	1 2	1 1	1 1	1 1	1 1	0 0	1 1	1 2	2 2	1 2	2 2	1 2	1 2	1 2	1 2	1 2	1 1	1 1	1 2	1 1	1 1	1 2	1 1	1 2	1 2	1 1	1 1	1 1	1 2	1 1	1 1	1 1	1 2	1 1	1 1	1 1	1 1	1 2	1 2	1 2	2 2	1 2	1 1	1 1	1 1	1 2	1 1	1 2	1 1	1 2	1 1	1 2	1 1	1 2	1 1	2 2	1 1	2 2	1 1	1 2	1 1	2 2	1 1	1 1	1 1	1 1	1 2	1 2	1 2	1 1	2 2	1 2	2 2	1 1	1 2	1 1	2 2	2 2	1 1	1 2	2 2	1 1	1 2	1 2	1 2	1 2	1 2	1 2	2 2	1 2	1 1	1 1	1 1	2 2	1 1	1 1	1 1	1 1	1 1	1 2	1 1	1 1	1 1	2 2	1 1	1 2	1 1	2 2	2 2	1 2	1 1	1 2	1 2	1 1	1 1	1 2	1 2	1 1	1 1	1 1	1 1	1 1	1 1	1 1	1 2	1 2	1 1	1 1	1 1	1 2	1 2	1 1	2 2	1 1	1 1	1 2	1 1	1 1	1 2	1 2	1 1	1 1	2 2	2 2	1 2	1 1	1 2	0 0	1 1	1 2	1 2	1 2	1 1	1 1	1 2	1 2	1 1	1 1	1 2	2 2	1 1	1 2	1 2	1 1	1 1	2 2	1 1	1 1	1 2	1 1	1 1	1 1	1 2	1 1	1 2	1 1	0 0	2 2	1 2	1 2	1 1	1 1	1 2	1 2	1 2	1 2	1 1	1 1	2 2	1 1	1 2	1 1	1 2	1 2	1 2	0 0	1 1	1 1	0 0	1 2	1 2	1 1	1 2	2 2	2 2	2 2	1 1	1 1	1 2	2 2	0 0	1 2	2 2	1 2	1 2	1 1	1 1	1 1	1 1	1 1	1 1	1 1	1 1	1 2	1 2	1 2	1 2	1 2	1 2	0 0	1 1	1 2	1 1	1 2	1 2	1 2	1 1	1 1	1 1	1 2	1 1	1 2	1 1	1 2	1 1	1 1	1 1	1 1	1 1	1 1	1 1	0 0	1 1	2 2	1 2	2 2	1 1	1 1	1 2	0 0	1 1	1 2	1 2	1 2	1 2	1 1	1 2	1 1	1 2	1 2	1 1	1 1	1 1	1 2	0 0	1 2	1 2	1 1	1 2	1 2	1 2	1 1	1 1	1 1	1 2	1 1	1 2	1 1	1 2	1 2	1 1	1 2	1 1	1 1	2 2	1 2	0 0	1 2	0 0	1 2	1 1	1 2	2 2	2 2	1 1	1 2	1 1	1 2	1 2	1 2	1 1	0 0	1 1	1 1	1 2	2 2	1 1	2 2	1 1	1 2	1 2	1 1	1 1	1 1	1 2	0 0	1 2	2 2	1 1	1 2	1 1	1 2	1 1	2 2	1 1	1 2	1 1	1 1	1 1	1 2	1 1	1 2	1 2	1 2	1 1	1 2	1 1	1 1	0 0	2 2	1 1	1 1	1 1	1 2	2 2	1 1	1 1	1 2	1 1	1 2	2 2	1 2	1 2	1 1	1 1	1 1	1 1	1 1	1 2	1 2	1 1	1 1	1 2	1 2	2 2	1 1	1 1	1 1	1 1	1 1	1 1	1 1	1 2	1 2	0 0	1 1	1 1	0 0	1 1	1 2	1 1	1 1	1 2	1 2	1 2	2 2	1 2	1 1	1 2	1 2	1 1	1 2	1 1	1 1	1 2	1 2	1 1	1 1	1 2	1 2	1 1	1 1	1 1	1 2	1 2	1 2	1 2	2 2	1 1	2 2	2 2	1 2	1 2	1 1	1 1	1 2	1 2	1 2	1 2	1 2	1 1	1 2	2 2	2 2	2 2	1 2	2 2	1 1	1 1	1 2	1 2	1 1	1 1	1 1	1 2	1 2	1 1	1 1	1 2	2 2	1 2	1 2	1 2	1 1	1 2	1 1	1 1	1 2	1 1	0 0	2 2	1 1	2 2	0 0	1 1	1 2	1 2	1 2	0 0	1 1	1 1	1 1	1 2	1 1	1 1	1 2	1 2	1 2	1 2	1 2	1 2	1 2	2 2	1 2	1 1	1 1	1 2	1 2	1 1	1 2	1 1	2 2	1 1	1 2	2 2	2 2	1 2	2 2	1 1	1 1	1 2	1 2	1 2	1 1	1 1	2 2	2 2	1 2	0 0	1 1	1 1	0 0	1 1	1 1	1 1	1 2	1 1	2 2	1 2	1 2	1 1	1 2	1 1	1 2	1 2	1 2	1 1	1 2	1 1	1 2	1 1	1 2	1 1	1 2	1 1	1 1	1 2	1 2	1 1	1 2	1 1	1 2	2 2	1 1	1 2	1 1	1 1	1 1	1 1	2 2	1 1	1 1	1 2	1 2	1 1	1 2	1 2	1 2	1 1	1 1	2 2	1 2	1 1	1 2	1 1	1 1	2 2	2 2	1 2	1 2	1 2	1 2	1 2	1 2	2 2	1 2	1 2	2 2	1 2	1 2	2 2	1 1	1 1	2 2	1 2	1 1	1 2	1 2	1 2	1 1	1 2	1 1	2 2	1 1	1 1	1 1	1 2	1 1	0 0	1 1	1 1	1 1	1 1	1 2	0 0	1 1	1 1	1 1	1 2	0 0	1 2	1 1	1 1	1 2	1 1	1 2	2 2	1 2	1 2	1 2	1 1	2 2	1 1	1 2	1 1	1 2	1 1	1 1	2 2	1 2	1 2	1 1	1 2	1 1	1 2	1 1	1 1	1 1	1 2	1 2	1 1	1 2	1 2	1 2	1 2	1 1	1 2	1 2	1 1	1 2	1 1	1 1	2 2	1 1	1 1	2 2	0 0	1 2	1 2	1 1	1 1	1 2	0 0	1 2	1 1	1 1	1 2	0 0	1 2	1 2	1 1	1 2	1 1	1 1	1 2	1 2	1 1	1 2	1 1	1 1	1 1	1 1	1 1	2 2	1 2	1 1	2 2	1 2	1 1	1 1	1 2	1 1	1 1	1 2	1 1	1 2	2 2	1 2	1 1	1 1	1 1	1 2	2 2	1 1	1 2	1 2	1 2	1 2	1 2	1 2	1 1	1 1	1 2	1 1	1 1	1 2	1 1	0 0	1 1	1 1	1 2	1 2	2 2	1 1	1 1	2 2	2 2	2 2	1 1	1 1	1 2	1 2	1 1	1 1	1 2	1 1	1 2	1 2	1 2	1 2	1 1	1 2	1 2	1 2	2 2	1 1	1 1	1 1	1 2	1 2	1 2	2 2	1 2	1 1	1 2	1 2	1 1	1 1	1 1	1 1	1 2	1 1	1 2	1 2	1 1	1 2	1 2	1 2	1 1	1 1	1 2	2 2	1 2	1 1	1 2	1 1	1 2	2 2	1 2	0 0	1 2	1 2	1 1	1 2	0 0	1 2	1 2	1 2	1 1	1 2	1 1	1 1	1 1	1 1	1 1	1 2	1 2	1 1	1 1	1 1	1 1	2 2	2 2	1 2	1 1	1 2	1 2	1 2	1 2	1 1	0 0	1 2	1 2	1 1	1 1	2 2	1 2	1 2	1 2	1 1	1 1	1 1	1 1	1 1	1 1	1 2	1 1	1 1	1 1	1 2	1 1	1 2	1 2	1 2	1 2	1 1	2 2	1 2	1 1	1 1	1 1	2 2	1 1	1 1	1 2	1 2	1 1	1 1	1 2	2 2	1 2	1 2	1 2	1 2	1 2	1 2	2 2	1 2	1 2	1 1	1 2	1 1	1 1	1 1	2 2	1 1	1 1	1 1	1 2	1 2	1 1	1 2	1 1	1 2	1 1	1 1	2 2	1 1	1 2	0 0	2 2	1 2	1 1	1 1	2 2	0 0	1 1	1 1	1 2	1 1	1 1	2 2	1 2	1 2	1 2	2 2	1 2	1 1	2 2	1 2	2 2	1 1	1 1	1 2	1 2	1 2	1 1	1 1	1 1	1 2	1 1	0 0	1 1	1 1	1 1	1 2	1 2	1 1	1 1	1 2	1 2	1 1	1 1	1 1	1 2	1 1	2 2	1 2	1 1	1 1	1 1	1 1	1 2	1 2	1 2	1 1	1 1	1 1	1 1	1 1	1 2	1 2	1 1	1 1	1 1	1 1	1 2	1 1	1 2	1 2	1 1	1 2	0 0	1 1	1 1	1 2	1 2	1 1	1 1	1 2	1 1	1 2	0 0	1 1	1 1	1 2	2 2	1 2	1 1	1 1	1 2	1 2	1 2	1 1	2 2	2 2	1 2	0 0	1 2	1 2	1 1	1 1	1 2	1 2	2 2	1 1	1 2	1 1	1 1	1 1	1 1	1 2	1 2	1 2	0 0	1 1	1 2	0 0	1 1	0 0	1 1	1 2	1 1	1 1	1 1	1 2	1 1	1 1	1 2	1 2	1 2	1 2	1 1	1 1	1 2	1 2	1 1	1 1	1 1	1 2	1 2	2 2	1 1	1 2	1 1	0 0	1 2	1 1	1 2	1 1	1 2	1 1	1 2	1 2	1 2	2 2	1 1	1 1	1 2	1 2	1 2	1 2	1 1	1 2	2 2	1 1	1 1	1 1	1 1	1 2	0 0	1 2	1 2	1 1	1 2	1 2	1 1	2 2	1 2	0 0	1 2	1 2	1 1	1 2	1 1	2 2	1 2	1 1	2 2	1 2	1 1	1 1	1 1	1 2	1 2	1 2	2 2	1 2	1 2	1 2	1 1	1 2	1 1	0 0	1 1	1 1	1 2	1 2	1 1	1 1	1 1	2 2	1 1	1 1	1 2	1 2	1 2	1 2	1 2	1 2	1 1	1 2	1 1	1 1	1 2	1 1	1 1	2 2	1 2	2 2	2 2	1 2	2 2	1 2	1 1	1 1	1 2	1 2	1 1	1 2	1 1	1 1	1 2	1 1	1 2	1 1	2 2	1 2	1 1	2 2	0 0	1 1	1 1	1 1	1 2	1 1	0 0	1 2	1 1	1 1	1 2	1 2	1 2	1 2	1 1	1 1	1 1	1 2	1 1	1 1	1 2	1 2	1 2	1 1	1 1	1 2	1 1	1 1	2 2	1 2	2 2	1 1	1 1	1 2	1 2	1 1	1 2	1 1	1 2	1 1	1 1	1 1	1 2	1 2	1 2	2 2	1 1	1 1	1 1	1 2	2 2	2 2	1 1	1 1	2 2	1 2	1 2	1 1	1 2	1 2	1 2	1 1	1 2	1 2	1 2	1 2	2 2	1 1	1 2	1 2	1 2	1 1	2 2	1 1	1 2	1 2	1 2	1 2	1 1	1 1	1 2	1 2	2 2	1 2	1 2	1 2	1 1	1 2	2 2	1 1	0 0	1 2	1 1	1 2	1 1	1 1	1 1	1 2	1 1	1 1	1 2	1 1	1 1	0 0	1 2	1 1	1 2	1 2	1 1	1 2	1 2	1 2	1 1	1 1	1 1	0 0	1 2	1 1	2 2	1 2	1 1	1 1	1 2	1 1	2 2	1 1	1 2	1 2	1 1	1 2	1 2	1 1	1 1	1 2	1 2	2 2	1 2	2 2	1 1	1 2	1 1	1 1	2 2	1 2	1 1	2 2	1 2	1 1	1 1	1 2	1 2	1 2	0 0	1 1	2 2	1 1	1 2	1 2	1 1	1 1	1 2	0 0	1 1	2 2	1 1	1 1	1 2	1 2	1 1	1 2	1 2	1 2	1 1	1 2	1 1	1 1	1 1	1 2	1 2	1 1	1 1	1 2	1 1	2 2	1 1	1 2	1 2	2 2	1 1	1 1	1 1	1 1	1 2	1 2	1 1	1 1	1 1	1 2	1 1	1 2	2 2	1 1	1 1	1 1	1 2	1 2	1 1	1 2	1 2	1 2	0 0	1 1	0 0	1 1	1 1	1 1	1 1	1 1	1 1	1 2	1 1	1 2	1 2	1 1	1 1	1 1	1 2	1 2	1 1	1 2	1 1	1 2	1 2	2 2	1 1	1 1	1 1	1 1	1 1	1 1	1 1	0 0	1 2	1 2	2 2	1 1	1 2	1 2	1 2	1 1	1 2	2 2	1 1	2 2	2 2	2 2	1 2	1 2	1 1	1 2	1 1	1 2	1 2	1 2	1 1	1 2	1 1	0 0	0 0	1 1	1 1	1 1	1 1	2 2	1 2	1 1	1 2	1 1	1 1	1 2	1 1	1 2	1 2	1 1	1 1	1 1	1 2	2 2	1 2	1 2	2 2	1 2	1 2	1 1	1 1	1 2	1 1	1 2	1 2	1 2	1 2	2 2	1 2	1 2	1 2	1 1	1 2	1 2	1 1	1 1	1 1	1 1	1 2	1 1	2 2	1 1	1 2	1 2	0 0	2 2	1 2	1 2	1 1	1 2	1 2	1 1	1 1	1 2	1 2	1 1	0 0	1 1	1 1	0 0	0 0	1 2	1 2	1 2	1 1	2 2	1 2	1 2	1 1	1 2	1 2	2 2	1 2	1 2	1 2	1 1	1 2	1 1	1 2	1 1	1 2	1 2	1 1	1 2	1 1	1 1	1 2	1 1	1 1	1 1	2 2	1 2	1 1	2 2	2 2	1 1	1 2	1 1	2 2	1 2	0 0	1 2	1 1	1 2	2 2	1 1	1 2	2 2	1 1	1 1	1 2	1 2	1 2	1 2	1 1	1 1	1 1	1 1	1 1	1 2	0 0	2 2	1 1	1 2	1 2	2 2	1 1	1 1	1 1	1 1	2 2	1 1	1 1	2 2	1 1	1 1	1 1	1 2	1 1	1 1	1 1	1 2	1 2	1 1	1 1	1 1	1 2	1 2	1 1	1 1	1 1	1 2	1 2	1 1	1 1	1 1	1 1	1 2	1 2	1 2	2 2	2 2	1 2	1 1	1 2	1 1	1 2	1 2	1 2	2 2	1 2	1 2	1 1	1 2	1 1	1 2	1 1	1 1	1 2	1 1	1 1	1 1	1 1	1 1	1 1	2 2	1 2	1 2	1 2	1 2	1 1	1 1	1 1	1 1	1 1	1 2	1 1	1 2	1 1	1 1	1 1	1 1	2 2	1 1	1 1	2 2	2 2	1 1	1 1	1 1	1 1	1 2	1 2	1 1	1 1	1 2	1 1	1 2	1 1	1 1	1 2	1 2	1 1	1 2	1 2	1 1	1 2	1 2	1 1	1 2	1 1	1 2	1 2	1 1	1 1	2 2	1 2	1 2	1 2	1 2	1 2	1 2	0 0	1 2	1 1	1 1	2 2	1 1	1 2	2 2	1 1	1 1	1 2	1 2	1 1	1 1	1 2	1 2	1 2	1 1	1 1	1 1	1 2	1 1	1 2	1 1	1 2	1 1	1 1	1 2	1 2	1 1	1 1	1 1	1 1	1 2	1 2	0 0	1 2	1 2	1 1	1 1	1 1	2 2	1 1	1 1	1 1	1 2	1 1	1 2	1 1	1 2	2 2	1 2	1 2	1 1	1 2	1 1	1 2	1 1	1 2	1 2	2 2	1 1	1 1	1 1	1 2	1 1	0 0	1 1	1 2	1 2	1 2	2 2	1 1	1 2	1 1	1 2	1 1	1 1	1 2	1 1	1 1	1 1	1 2	1 2	1 2	1 2	1 2	1 1	1 1	1 2	1 1	1 2	1 2	1 2	1 2	1 2	1 2	1 2	1 2	1 2	2 2	1 1	1 1	1 2	2 2	1 2	1 1	1 2	1 1	1 2	1 1	1 2	1 1	1 1	1 2	1 2	1 1	1 1	1 2	1 2	1 1	1 1	1 2	1 2	2 2	1 2	1 2	2 2	2 2	1 2	1 1	1 2	1 1	1 1	1 2	0 0	1 2	1 1	1 1	1 2	1 1	1 2	2 2	1 1	1 2	1 2	1 1	1 2	1 2	1 1	2 2	1 2	1 1	1 2	1 2	1 2	1 1	1 1	1 2	1 2	1 2	2 2	1 2	2 2	1 1	1 2	1 1	1 2	1 1	1 2	1 2	1 1	1 2	1 2	1 1	2 2	1 1	1 2	1 1	1 1	1 2	1 1	1 2	1 2	2 2	1 2	1 2	1 2	1 2	1 2	1 2	1 1	1 2	1 2	1 1	2 2	1 1	1 2	1 2	0 0	1 2	1 2	1 2	2 2	1 1	1 1	1 2	1 1	1 1	1 1	1 1	1 2	2 2	1 2	1 1	1 1	1 1	1 1	1 1	1 2	1 1	1 2	1 1	1 2	1 1	1 2	1 1	2 2	1 2	1 2	1 1	1 1	1 1	1 1	2 2	1 1	1 2	1 2	1 2	1 2	1 1	1 1	1 1	2 2	1 1	0 0	1 1	1 2	1 2	1 2	1 2	2 2	1 2	1 2	1 2	1 1	1 2	1 2	1 2	1 1	2 2	1 2	1 2	1 1	0 0	1 2	1 2	1 2	1 1	1 1	1 2	1 2	1 2	1 1	1 1	1 2	1 1	1 2	1 2	1 2	1 2	1 1	1 1	1 2	1 1	1 2	2 2	2 2	1 1	1 2	1 1	1 2	1 2	1 2	1 1	1 2	1 2	1 1	1 1	1 2	1 2	1 1	2 2	2 2	1 1	1 1	1 1	1 1	1 2	1 1	1 2	1 2	1 2	1 1	1 1	1 1	1 1	1 1	1 1	1 2	1 1	1 2	1 2	1 1	1 1	1 1	1 1	1 1	1 2	1 2	1 1	1 2	1 2	1 1	1 2	1 1	1 1	1 1	1 2	1 2	1 2	1 2	1 2	1 1	1 2	1 1	1 1	1 1	1 2	1 1	1 2	1 1	1 2	1 2	1 1	1 2	1 2	1 2	1 2	1 1	1 2	1 1	1 1	1 2	2 2	1 2	1 1	1 2	1 1	1 1	1 1	1 2	1 2	2 2	1 1	1 2	1 2	1 1	1 1	1 2	1 1	2 2	1 1	1 1	1 1	0 0	1 2	1 1	2 2	1 1	1 2	1 1	1 1	1 1	1 1	1 2	1 1	1 1	1 1	1 1	1 1	1 2	1 2	1 1	1 2	1 2	1 1	1 1	1 1	1 2	1 1	1 1	1 2	1 2	1 1	1 1	1 1	1 1	1 1	1 2	1 2	1 2	1 1	1 1	1 1	1 1	1 1	1 1	1 1	1 1	1 1	1 1	0 0	1 1	1 2	1 1	0 0	1 2	1 1	1 2	1 2	1 1	1 1	1 2	1 1	1 1	1 1	1 1	1 2	1 1	1 2	1 2	2 2	1 1	1 1	1 1	1 1	1 1	1 1	1 2	1 1	1 2	0 0	1 2	1 2	1 1	1 1	1 2	1 1	2 2	1 1	1 1	1 1	1 2	1 1	1 2	1 2	1 1	1 1	2 2	1 1	2 2	1 1	1 2	1 2	2 2	1 2	1 2	0 0	1 2	2 2	1 2	1 2	1 1	1 1	1 1	1 2	1 1	1 1	1 1	1 1	1 2	0 0	1 1	1 2	1 2	1 2	1 2	1 2	1 1	1 1	1 2	1 2	2 2	1 2	1 2	1 1	0 0	1 1	1 2	1 1	1 1	1 2	1 2	1 1	1 2	1 1	1 1	1 2	1 2	1 2	1 1	1 2	1 2	1 1	1 1	1 1	1 2	1 1	2 2	1 2	1 1	1 1	1 1	1 1	2 2	2 2	1 1	2 2	1 1	1 2	1 2	1 2	1 2	1 2	1 1	1 2	1 2	1 1	1 2	1 2	1 2	1 2	1 1	1 2	1 1	1 1	1 2	1 2	1 2	1 2	1 1	1 2	2 2	1 2	1 1	1 2	1 2	2 2	1 1	1 2	1 2	1 2	1 1	1 1	2 2	1 1	1 2	1 2	0 0	1 1	1 1	1 2	1 2	1 2	1 1	1 1	1 1	1 1	1 1	1 2	1 2	1 2	1 1	2 2	1 1	1 2	1 1	0 0	1 2	1 2	1 1	1 1	1 2	1 2	1 2	1 2	1 2	1 1	0 0	1 1	1 2	1 1	1 1	1 2	1 2	1 2	1 2	1 2	1 2	1 2	2 2	1 1	1 2	1 1	1 2	1 2	1 1	1 2	1 2	1 1	1 1	1 2	1 1	1 1	1 2	1 1	1 1	1 2	1 1	1 1	2 2	1 2	1 1	1 2	2 2	1 2	0 0	1 1	2 2	2 2	1 1	1 1	1 2	1 1	2 2	1 1	1 1	1 1	1 1	1 1	1 2	1 1	2 2	1 1	1 1	1 1	1 2	1 2	2 2	1 2	1 2	2 2	1 2	1 2	1 1	1 1	2 2	1 1	1 1	1 2	1 2	1 1	2 2	1 1	1 1	0 0	1 1	1 2	1 1	1 2	1 1	1 1	1 2	1 1	2 2	1 1	1 1	1 2	1 2	1 1	1 1	1 1	0 0	1 1	1 2	1 1	2 2	1 2	2 2	1 1	1 2	1 1	1 1	1 2	1 1	1 2	1 2	1 1	2 2	1 2	1 2	1 2	2 2	1 1	2 2	1 2	1 2	1 1	1 2	1 1	1 1	2 2	1 1	1 2	1 2	1 2	1 1	1 1	1 1	1 2	2 2	2 2	1 2	1 2	1 2	1 1	1 1	1 1	1 2	1 1	1 2	1 1	1 1	1 2	1 1	1 1	1 1	1 1	1 1	1 1	1 1	1 2	1 1	1 2	1 2	1 1	1 2	1 2	1 1	1 1	2 2	0 0	1 2	1 2	1 2	0 0	1 2	1 1	1 1	1 2	1 1	2 2	1 1	1 2	1 1	1 2	1 1	1 1	0 0	1 1	2 2	1 1	1 2	1 1	1 1	1 1	1 1	1 1	1 2	1 2	1 2	1 2	1 1	1 2	1 1	1 2	1 2	1 2	2 2	1 2	1 2	1 2	2 2	1 1	1 2	1 2	1 2	2 2	1 2	1 1	1 2	1 1	1 2	1 2	1 1	1 2	1 1	2 2	1 2	1 1	1 2	1 2	1 2	1 2	1 1	1 1	2 2	1 1	1 2	1 1	1 2	1 1	2 2	2 2	1 2	1 2	2 2	1 1	1 2	1 1	1 2	1 1	1 2	0 0	1 2	1 1	1 1	1 1	1 1	1 1	1 2	1 1	1 2	1 1	2 2	1 2	1 2	1 1	1 2	1 2	1 1	1 1	1 2	1 2	1 2	1 2	2 2	1 2	1 1	1 1	1 2	1 2	1 1	2 2	1 1	1 2	1 1	1 2	1 2	1 1	1 1	2 2	1 1	1 2	1 2	1 2	1 2	1 2	1 1	1 1	1 2	1 2	2 2	1 2	1 2	1 1	2 2	1 1	2 2	1 1	1 1	1 1	1 2	1 1	1 2	1 1	1 1	1 2	1 2	0 0	1 2	1 2	2 2	1 1	1 1	1 1	1 1	1 1	1 1	1 1	1 2	1 1	1 1	1 2	1 2	1 1	1 1	1 1	1 1	1 1	1 1	2 2	1 2	1 1	1 1	1 2	1 1	1 2	1 1	1 1	1 1	1 2	1 2	1 1	2 2	2 2	1 1	1 1	1 2	2 2	1 1	1 2	1 2	1 2	2 2	1 2	2 2	1 2	1 2	1 1	1 1	1 2	1 1	2 2	1 1	1 2	1 2	1 2	1 2	2 2	1 1	1 2	1 2	1 1	2 2	1 2	1 1	2 2	1 2	1 2	1 2	0 0	2 2	1 2	2 2	1 2	1 1	1 1	1 1	1 2	1 1	1 2	1 2	1 2	1 1	1 1	1 1	1 2	1 1	1 1	1 1	1 1	1 1	1 1	1 1	1 1	1 2	1 2	2 2	1 1	1 1	1 2	1 1	1 2	1 2	1 2	1 2	1 2	1 2	1 1	1 2	1 1	2 2	1 1	1 2	2 2	1 1	1 2	1 2	1 1	1 1	1 2	2 2	1 1	2 2	1 2	1 1	1 2	1 1	1 2	1 1	1 1	1 1	2 2	1 2	1 2	1 1	1 1	1 2	1 1	1 1	1 2	1 1	1 2	1 2	1 2	1 2	1 2	1 1	1 2	1 2	1 2	1 1	1 2	1 1	1 2	1 1	1 2	1 1	2 2	1 2	1 1	2 2	1 2	1 1	1 1	1 1	1 2	1 1	1 2	1 1	1 2	1 1	1 1	1 1	1 1	1 1	1 2	1 1	1 2	1 2	1 2	1 2	1 1	2 2	1 2	1 1	1 2	1 2	1 1	0 0	1 1	1 1	1 2	2 2	1 2	1 1	1 2	1 1	1 2	1 1	1 1	1 2	1 2	1 1	0 0	1 2	1 2	1 2	1 1	1 2	1 2	1 1	1 1	1 1	1 2	1 2	2 2	1 2	1 1	1 1	2 2	2 2	2 2	1 2	1 1	2 2	1 1	2 2	1 1	1 1	1 1	2 2	1 2	1 1	1 2	1 1	1 2	1 2	1 2	1 1	1 1	1 2	1 2	1 1	1 1	1 2	2 2	1 2	1 1	1 1	1 2	2 2	1 1	0 0	1 2	1 2	1 2	1 2	1 1	1 1	1 2	1 1	1 2	1 2	1 1	1 1	1 2	1 1	1 1	2 2	1 1	1 1	1 1	1 1	1 1	1 2	1 2	1 1	1 1	1 2	1 2	1 2	1 1	2 2	2 2	1 2	1 1	1 1	1 2	1 2	1 1	1 2	1 2	1 2	1 2	1 1	1 1	1 2	1 2	1 1	1 2	1 2	1 2	1 2	0 0	1 2	1 1	2 2	1 2	1 2	1 2	1 1	1 1	1 2	1 1	1 1	0 0	1 2	1 2	1 2	1 2	0 0	1 1	1 1	1 1	2 2	0 0	1 1	1 1	1 2	1 2	1 1	2 2	2 2	1 2	1 2	1 1	1 2	1 2	1 1	1 2	2 2	1 2	1 1	2 2	1 1	1 2	0 0	1 2	1 1	1 2	1 1	1 1	1 2	1 2	1 1	1 1	1 1	1 1	1 1	1 1	1 1	1 2	2 2	1 2	1 2	1 2	2 2	1 2	1 2	1 2	1 1	1 2	1 1	1 2	1 1	1 2	1 1	2 2	1 2	1 1	1 1	1 1	1 2	1 1	1 1	1 1	1 1	1 2	1 1	0 0	1 1	1 2	1 1	1 1	1 1	1 2	1 2	1 2	1 2	1 1	1 1	1 2	1 2	1 2	1 2	1 2	1 2	1 1	1 2	1 1	1 2	1 1	1 1	1 2	1 2	0 0	1 1	1 2	1 2	1 2	1 2	1 2	1 1	1 1	1 1	2 2	1 2	1 2	1 1	1 2	1 2	2 2	1 2	1 1	1 1	1 2	1 1	1 1	1 2	1 2	1 2	1 1	1 1	2 2	1 1	1 2	0 0	1 1	1 1	1 1	1 1	1 2	1 1	1 2	1 2	1 2	1 1	0 0	1 2	1 2	1 2	2 2	1 2	1 2	1 1	1 2	2 2	1 2	0 0	2 2	1 2	1 2	0 0	1 2	2 2	2 2	1 1	1 1	1 2	2 2	2 2	1 2	1 1	1 1	1 2	1 1	1 1	1 2	2 2	1 2	1 1	1 1	1 2	1 1	1 1	1 1	0 0	1 1	1 1	1 2	2 2	1 1	1 2	2 2	1 1	1 1	1 2	1 2	1 1	1 2	1 1	1 1	1 1	1 1	1 1	1 2	1 1	2 2	1 1	1 1	1 1	1 1	1 1	1 1	1 1	1 2	1 1	2 2	2 2	1 2	1 1	1 2	1 1	2 2	1 2	1 1	1 1	1 1	1 2	1 2	1 1	1 2	1 1	1 1	1 1	1 2	1 1	1 1	1 2	1 2	1 1	1 1	0 0	1 2	1 2	1 2	1 1	1 2	2 2	1 1	2 2	1 1	1 2	1 1	1 1	1 2	1 2	1 2	1 1	1 2	1 2	1 1	1 1	1 1	2 2	1 2	1 1	1 1	1 1	1 2	1 1	1 1	1 2	1 2	1 2	1 2	1 1	1 1	1 1	1 1	1 2	1 1	2 2	1 1	1 2	1 2	2 2	1 1	1 2	1 1	1 1	1 2	2 2	1 2	1 2	1 1	1 1	1 1	1 1	1 2	1 1	1 1	1 2	2 2	1 2	1 2	1 2	1 1	1 1	1 1	1 2	1 2	1 1	1 2	1 1	1 2	1 1	1 2	2 2	1 1	1 2	1 1	1 1	1 2	1 2	1 2	1 1	1 1	1 1	1 1	2 2	2 2	1 1	1 2	1 1	1 2	2 2	1 2	1 1	1 2	1 1	1 1	1 1	1 1	1 2	2 2	2 2	1 1	2 2	1 1	2 2	1 1	1 1	1 2	1 2	1 1	1 2	1 2	1 2	1 1	1 2	1 2	1 1	1 2	2 2	1 1	1 1	1 2	1 1	1 2	1 2	1 1	2 2	1 1	1 2	1 1	1 2	1 1	1 1	1 2	1 2	1 1	1 2	2 2	1 2	2 2	1 2	1 1	1 2	1 1	0 0	1 2	1 1	1 1	1 1	1 1	1 2	1 2	1 2	1 2	1 2	1 2	2 2	1 1	1 1	1 2	1 1	1 2	1 2	1 1	2 2	2 2	1 1	1 2	1 1	1 1	2 2	1 2	1 2	1 1	1 1	1 2	1 2	1 2	1 2	1 1	1 2	1 1	1 2	1 2	1 1	1 1	1 1	0 0	1 2	1 2	1 2	1 1	1 2	1 2	2 2	1 2	1 1	1 2	1 2	1 1	1 2	1 1	1 1	2 2	0 0	1 2	1 2	1 2	1 2	2 2	0 0	1 1	1 1	1 2	1 1	1 2	2 2	1 1	1 2	2 2	2 2	1 2	1 1	1 2	1 2	1 2	1 1	1 1	1 2	1 1	1 1	1 1	1 1	1 2	1 2	2 2	1 2	1 2	1 2	1 2	1 1	1 1	1 2	1 2	1 2	1 1	1 2	1 2	0 0	1 1	1 1	1 2	1 1	2 2	1 1	1 2	2 2	1 2	1 1	1 2	1 1	1 1	1 1	1 2	2 2	1 2	1 1	1 2	1 2	1 1	1 1	1 2	1 1	1 2	1 1	1 1	1 2	1 1	2 2	1 2	1 1	1 2	1 2	1 1	1 1	1 1	1 1	1 1	1 1	1 2	1 2	1 2	2 2	1 2	1 1	1 1	1 1	1 2	1 2	1 1	1 1	1 2	1 2	1 1	2 2	1 1	1 1	2 2	1 1	1 2	1 1	2 2	1 2	1 1	2 2	1 1	1 2	1 2	1 1	1 1	2 2	1 2	0 0	1 2	1 1	0 0	1 1	1 2	2 2	1 1	1 2	2 2	1 2	1 1	1 2	0 0	1 1	1 2	1 1	1 2	2 2	1 1	1 1	1 1	1 1	1 2	1 1	1 1	1 2	1 1	2 2	1 1	1 1	1 1	1 2	1 2	1 2	1 2	1 2	1 1	1 2	1 1	1 2	1 2	1 1	1 1	1 2	1 1	1 1	1 2	1 2	1 2	1 1	2 2	1 2	1 1	1 1	1 1	1 1	1 1	1 2	1 1	1 1	1 2	2 2	1 1	1 1	1 2	1 1	1 1	1 1	1 2	1 2	2 2	1 2	1 2	1 1	1 2	1 1	1 2	1 1	1 1	1 1	1 1	1 1	1 2	1 1	1 1	1 1	1 1	1 2	1 2	1 1	1 2	1 2	1 2	1 1	1 1	1 2	1 2	2 2	1 1	1 2	1 1	1 1	1 1	1 1	1 2	1 2	1 2	1 1	1 1	1 1	1 2	1 2	1 2	1 1	2 2	1 1	1 2	1 1	1 1	1 2	1 1	2 2	1 1	2 2	1 1	1 2	1 1	1 2	2 2	1 2	1 2	1 1	1 2	1 1	2 2	1 2	2 2	1 1	1 2	1 1	1 1	1 2	2 2	1 1	2 2	1 2	1 1	1 1	1 1	1 2	1 2	2 2	1 1	1 1	1 2	1 2	1 2	2 2	1 1	1 2	1 2	1 1	1 1	1 1	1 2	1 1	1 1	1 1	1 1	1 2	1 2	1 1	1 2	0 0	2 2	1 1	1 1	1 1	1 2	1 1	1 1	1 2	2 2	1 1	1 2	1 2	1 1	1 2	2 2	1 2	1 2	1 1	1 2	1 1	2 2	1 2	1 1	2 2	1 1	1 2	2 2	1 2	1 2	1 2	1 1	1 1	1 2	1 1	1 1	1 1	1 2	1 1	1 1	1 2	1 1	2 2	1 1	1 2	1 1	1 1	1 1	1 2	1 1	1 1	1 2	1 1	1 2	1 1	1 1	1 2	0 0	1 2	1 1	2 2	1 2	1 1	1 1	1 2	1 2	1 1	1 1	1 2	1 1	1 1	1 1	2 2	1 1	1 2	1 1	1 1	1 2	1 1	1 2	1 1	1 1	1 2	1 1	1 1	1 2	1 2	1 1	1 1	2 2	2 2	1 1	0 0	1 1	1 2	1 2	1 1	1 2	2 2	1 1	1 1	1 2	1 1	1 2	1 2	1 1	1 2	2 2	1 2	1 1	0 0	2 2	1 1	1 2	1 1	1 2	0 0	2 2	1 2	1 2	1 1	2 2	1 1	1 1	1 2	1 2	1 2	1 1	1 2	1 1	1 2	1 2	1 1	1 2	1 2	1 1	2 2	1 2	1 1	1 2	1 1	1 1	1 1	1 2	1 1	1 1	0 0	0 0	1 2	1 1	1 2	1 2	1 2	1 1	1 1	1 2	1 2	1 1	1 1	1 1	1 2	1 1	1 2	1 2	1 1	1 2	2 2	1 2	1 1	1 1	1 2	1 2	1 1	1 1	1 1	1 2	1 2	1 2	1 2	1 2	1 1	1 1	1 2	1 1	1 1	1 2	1 1	2 2	1 1	1 1	1 2	1 1	1 2	1 1	2 2	2 2	1 2	1 2	1 1	2 2	2 2	1 2	1 1	1 1	1 1	1 2	1 2	1 2	1 1	1 2	1 2	1 1	1 1	1 1	1 2	1 1	1 1	1 2	1 2	2 2	2 2	1 2	1 1	1 2	1 2	2 2	1 1	1 1	1 2	2 2	1 2	2 2	1 1	1 2	1 2	1 1	1 1	1 1	1 2	1 2	1 1	1 1	1 1	1 2	1 1	1 1	1 2	1 2	1 2	1 1	1 2	0 0	1 1	2 2	1 2	1 2	1 2	2 2	1 2	1 2	1 2	2 2	1 1	1 1	1 1	1 1	2 2	1 2	1 1	1 1	1 2	1 1	1 2	1 1	2 2	1 2	1 2	1 2	1 2	1 2	1 1	1 1	1 2	1 2	1 2	1 2	1 2	1 1	1 1	2 2	1 1	1 2	1 1	1 1	1 1	2 2	1 1	1 2	2 2	1 2	1 2	1 2	1 2	1 2	1 1	1 2	1 1	1 1	1 2	1 1	1 2	1 2	1 1	1 1	1 1	1 2	1 2	1 1	1 1	1 2	1 1	1 1	1 1	1 2	1 2	2 2	1 1	1 1	1 2	1 2	1 2	0 0	1 2	1 1	1 1	1 1	2 2	0 0	1 1	1 1	1 1	1 2	1 2	1 1	1 2	1 2	1 2	2 2	2 2	1 1	1 2	1 2	1 2	1 1	1 1	1 1	1 2	1 2	2 2	1 1	1 1	2 2	1 2	2 2	1 2	1 2	1 1	1 1	1 1	1 2	1 1	2 2	1 2	1 1	1 1	1 2	1 1	1 2	1 2	1 2	1 1	1 2	1 2	1 1	1 1	1 2	1 2	1 2	1 2	0 0	1 2	1 1	1 2	1 2	1 1	1 2	1 2	1 1	2 2	2 2	0 0	2 2	2 2	1 2	1 2	1 1	1 1	0 0	1 1	2 2	1 1	2 2	1 2	2 2	1 1	1 2	1 1	1 1	1 2	1 1	1 2	1 1	1 1	1 2	1 1	1 2	1 1	2 2	1 1	1 2	1 1	1 1	1 1	1 1	1 2	1 2	1 2	1 1	1 1	1 1	1 2	1 1	1 2	1 2	2 2	1 1	1 2	1 1	1 1	1 2	0 0	1 1	1 2	1 1	1 1	0 0	1 1	1 2	1 1	1 2	1 1	1 1	2 2	1 2	1 1	1 2	1 1	1 2	2 2	0 0	0 0	1 2	1 1	1 1	1 1	1 1	1 2	1 2	1 1	1 1	1 2	1 1	1 1	1 1	1 1	1 2	1 2	1 1	1 2	1 2	1 1	1 1	1 2	1 2	1 2	1 2	1 1	1 1	1 2	1 2	1 1	1 2	1 2	1 2	1 2	1 1	1 1	1 2	1 1	1 1	1 1	1 2	1 1	1 1	1 2	1 1	1 2	1 1	1 1	1 2	1 1	1 2	1 1	1 1	2 2	1 1	1 2	1 1	1 2	1 1	1 1	1 1	1 2	2 2	1 1	1 2	1 1	1 2	0 0	1 1	1 1	1 1	1 1	1 2	0 0	1 2	1 2	1 1	1 2	1 1	1 1	1 1	1 2	1 1	1 2	2 2	1 2	1 2	2 2	2 2	1 2	0 0	1 1	1 2	2 2	1 1	1 1	1 1	1 1	1 1	1 1	1 1	2 2	1 2	1 2	1 1	1 2	1 1	1 2	1 2	2 2	1 2	1 1	0 0	1 1	1 1	2 2	1 2	1 1	1 1	1 2	2 2	1 1	1 2	1 1	1 2	2 2	1 2	1 1	2 2	1 2	1 1	2 2	1 2	1 1	1 1	1 2	1 1	1 1	1 2	1 1	1 2	1 2	1 2	1 1	0 0	0 0	1 2	1 1	1 2	1 2	1 1	1 2	1 2	1 1	1 2	1 1	1 2	1 2	1 2	1 2	1 2	2 2	1 2	1 2	1 1	1 2	1 2	1 2	1 2	1 2	1 2	1 2	2 2	1 2	1 2	1 1	2 2	1 1	1 1	1 1	2 2	1 2	1 1	1 1	2 2	1 2	2 2	1 1	1 1	1 1	1 1	2 2	1 2	1 1	1 1	1 2	1 1	1 1	2 2	1 1	1 1	1 2	2 2	1 1	1 2	2 2	1 2	1 2	1 1	1 2	1 1	1 1	1 1	1 1	1 1	1 1	1 1	1 1	1 1	1 1	1 1	1 1	1 1	1 1	1 1	1 1	1 1	2 2	1 2	2 2	2 2	1 2	1 2	1 1	1 2	1 1	1 1	1 1	1 2	1 1	1 1	1 1	2 2	1 2	1 2	2 2	1 2	1 1	1 2	1 2	1 1	1 1	2 2	1 1	1 2	1 2	1 2	1 2	1 1	1 2	1 1	1 1	1 2	1 1	1 1	1 1	2 2	1 1	1 1	0 0	1 2	1 1	1 1	1 2	1 1	1 1	1 2	1 1	2 2	1 1	1 2	0 0	1 1	1 1	1 2	2 2	2 2	1 2	1 1	1 1	1 1	1 1	1 2	1 2	2 2	1 1	2 2	1 1	1 2	2 2	2 2	1 2	1 1	0 0	1 1	1 2	1 2	2 2	1 1	1 2	1 2	1 1	1 1	1 2	1 2	2 2	1 1	1 2	1 1	1 1	1 2	1 1	1 1	1 2	1 1	1 2	1 1	1 2	2 2	1 1	1 1	1 1	1 1	1 2	1 2	1 1	1 1	1 1	1 1	1 2	1 1	1 1	1 2	1 2	1 2	1 1	1 1	1 1	1 2	1 1	1 2	1 1	1 2	1 2	1 1	1 1	1 1	1 2	1 1	1 2	1 2	1 1	1 1	1 1	1 1	0 0	1 1	1 2	1 2	1 1	1 1	1 1	1 2	0 0	0 0	1 2	1 1	1 1	1 1	1 1	1 1	1 1	1 2	1 1	1 1	1 2	1 2	1 1	2 2	0 0	1 2	1 1	1 1	1 2	1 1	1 2	2 2	1 1	1 2	1 1	1 2	2 2	1 1	1 2	1 1	1 2	1 1	1 1	1 2	1 1	1 2	1 1	1 2	2 2	1 1	1 2	0 0	1 2	1 1	1 2	1 2	1 1	1 1	1 1	1 2	1 1	0 0	1 2	1 2	1 1	1 1	1 2	1 1	1 2	1 2	1 1	1 1	1 2	1 2	2 2	1 1	1 1	1 2	2 2	2 2	1 2	1 1	1 2	1 1	1 2	1 2	1 1	1 1	1 1	1 2	1 2	1 2	1 1	1 1	1 1	1 2	2 2	1 1	1 1	1 2	2 2	1 2	1 1	1 2	2 2	1 1	1 2	1 2	1 1	1 1	1 1	1 1	1 1	1 1	1 1	1 2	1 2	1 2	1 2	1 2	1 1	1 2	1 1	1 2	1 1	1 2	1 1	1 2	1 1	1 1	1 1	1 1	1 1	1 2	1 2	1 1	1 1	1 1	1 1	0 0	1 1	1 1	1 1	1 2	1 1	1 2	1 2	1 1	1 2	1 2	1 1	1 1	1 1	1 2	1 1	1 2	2 2	1 1	1 1	1 2	1 1	1 2	1 1	1 1	2 2	1 1	1 1	1 1	1 2	1 2	1 1	1 2	1 1	1 1	2 2	1 2	1 2	2 2	1 1	1 2	1 1	1 2	1 2	1 2	1 1	1 2	1 2	1 2	1 2	1 2	1 1	1 2	2 2	1 1	1 2	1 1	1 1	1 1	1 1	1 2	1 1	1 1	1 2	2 2	1 1	1 2	2 2	1 2	1 1	1 1	1 1	1 1	1 1	2 2	1 2	1 1	1 1	1 2	1 1	1 1	1 2	1 2	1 2	1 2	1 2	1 1	1 2	1 1	1 2	2 2	2 2	1 1	1 2	1 2	2 2	1 1	1 1	1 2	1 1	1 2	1 1	1 1	1 1	1 2	1 2	1 2	0 0	1 1	1 2	1 1	1 1	1 2	1 2	2 2	1 1	1 2	1 1	1 1	1 1	2 2	1 1	1 2	1 2	1 2	1 2	1 2	1 2	0 0	1 2	1 2	1 1	1 1	1 1	1 2	1 2	1 2	1 2	1 2	1 2	1 1	1 1	2 2	2 2	1 2	1 1	1 2	1 2	1 1	1 2	1 1	1 1	1 1	1 1	1 1	2 2	1 1	1 1	1 2	1 2	1 2	1 2	1 1	1 2	0 0	2 2	1 1	1 1	1 1	1 2	2 2	1 2	1 2	2 2	1 1	1 1	1 2	1 2	1 2	1 2	1 2	1 2	1 1	1 2	1 1	1 1	1 2	1 2	1 1	1 1	1 1	1 1	1 2	2 2	2 2	1 2	1 2	1 1	1 2	1 1	1 1	1 1	1 2	1 1	1 2	1 2	1 1	1 1	1 1	1 2	1 2	1 1	1 2	1 2	1 2	1 2	1 2	1 1	1 2	1 1	1 1	2 2	1 1	1 1	1 1	1 1	1 1	1 2	1 2	1 1	1 1	1 1	1 1	1 2	1 1	1 2	1 1	1 1	1 2	1 1	1 2	0 0	1 2	1 2	1 1	1 1	1 1	1 2	1 1	1 1	1 1	1 2	1 2	2 2	1 1	1 2	1 1	1 1	1 2	1 2	1 1	1 2	1 2	1 1	1 2	1 1	1 2	1 1	1 2	2 2	0 0	1 2	0 0	1 1	1 2	1 2	1 1	1 2	1 1	1 2	1 2	2 2	1 2	1 1	1 1	1 1	1 2	2 2	1 2	1 1	2 2	0 0	1 1	1 2	1 1	1 2	1 1	1 1	1 1	1 2	1 2	1 1	1 2	2 2	1 2	1 1	1 1	1 2	1 1	1 2	1 2	1 1	1 2	1 2	1 1	1 1	1 1	1 2	1 1	1 2	1 2	1 1	1 1	1 1	1 1	1 2	2 2	1 1	1 1	1 1	1 2	1 2	1 1	1 2	1 2	0 0	2 2	1 2	1 2	1 2	1 2	1 2	1 1	2 2	1 2	1 2	1 2	1 2	1 2	2 2	1 2	1 1	1 2	1 1	1 1	1 1	1 2	0 0	1 2	1 2	1 1	1 1	1 2	1 2	1 2	1 1	1 1	1 1	1 1	1 1	1 1	1 2	1 1	1 1	2 2	1 2	1 2	1 1	1 2	1 2	2 2	1 1	1 2	2 2	1 2	1 2	1 2	1 2	1 2	1 2	1 2	1 2	1 1	1 2	1 1	1 2	1 2	1 2	1 2	0 0	2 2	1 2	1 2	1 1	1 1	1 2	1 2	2 2	1 2	2 2	1 2	2 2	1 2	1 1	1 1	1 2	1 2	2 2	1 2	0 0	1 2	1 2	1 1	1 2	1 2	1 2	1 1	1 1	1 1	1 1	1 1	1 1	1 1	1 1	1 2	1 1	1 2	1 2	2 2	2 2	2 2	1 1	1 1	1 2	1 2	1 1	1 2	1 1	1 2	1 1	1 1	1 2	1 1	1 2	1 2	1 2	2 2	1 1	1 1	1 1	1 2	0 0	1 2	1 1	1 1	0 0	1 1	1 2	1 1	2 2	1 2	1 2	1 2	1 2	2 2	1 2	1 1	1 2	0 0	1 1	1 2	1 1	1 2	1 1	1 1	1 1	1 1	1 2	0 0	2 2	1 1	2 2	1 1	1 1	1 1	1 1	1 2	1 1	1 2	1 2	1 1	1 1	1 1	1 1	1 2	1 1	1 2	1 1	1 2	1 1	1 2	1 1	1 1	1 1	1 2	1 1	1 1	1 1	1 1	1 1	1 1	1 1	1 1	1 1	2 2	1 1	1 1	2 2	0 0	1 1	1 1	1 1	1 2	2 2	1 2	1 1	1 1	1 2	1 1	1 1	1 1	1 1	0 0	1 1	1 2	1 1	1 2	1 2	1 1	1 1	1 2	2 2	1 2	1 2	1 2	1 2	1 1	1 1	2 2	1 1	1 1	1 2	1 2	1 2	1 2	1 1	1 2	1 1	1 1	1 2	1 1	1 2	1 1	1 1	1 1	1 2	1 1	1 2	1 2	1 2	1 1	1 1	1 1	1 2	1 1	1 2	1 2	1 2	1 1	1 2	0 0	2 2	1 2	1 1	1 2	1 1	1 2	1 1	1 1	1 2	1 2	1 2	1 2	1 1	1 2	1 1	1 1	1 2	1 1	1 2	2 2	1 1	1 1	1 2	1 2	1 1	1 2	1 2	1 2	2 2	1 2	1 1	1 2	1 2	1 1	1 2	1 2	1 1	1 2	2 2	1 2	1 2	0 0	1 2	1 2	1 1	2 2	1 1	1 2	2 2	1 2	1 2	1 2	1 1	1 2	1 2	1 1	2 2	1 2	1 2	1 2	1 1	1 2	2 2	1 2	1 1	1 2	1 2	2 2	1 1	1 1	1 2	2 2	1 2	1 2	1 1	1 1	1 1	1 1	1 1	1 1	1 1	1 2	1 2	1 2	1 1	1 2	1 1	2 2	1 2	1 1	1 1	1 1	1 2	1 1	1 1	1 1	1 2	1 2	1 1	1 2	2 2	1 1	1 2	1 2	1 1	1 1	1 2	2 2	1 1	2 2	1 1	1 1	1 1	1 2	1 2	1 2	1 2	1 1	2 2	1 2	1 2	1 2	1 1	1 1	1 1	1 2	1 2	1 2	1 1	1 2	1 2	1 2	1 2	1 2	1 1	1 1	2 2	1 2	1 1	1 2	1 1	1 1	2 2	1 1	1 2	1 1	1 1	1 2	1 2	1 1	1 1	1 2	1 1	1 1	1 2	1 1	1 2	1 1	1 1	1 2	1 1	1 2	1 2	0 0	1 2	1 2	1 1	1 2	0 0	1 1	1 1	1 1	1 2	1 2	1 1	1 1	0 0	1 2	1 2	1 2	0 0	1 1	1 2	2 2	1 2	2 2	1 1	2 2	2 2	1 1	1 2	1 2	1 1	1 1	1 1	1 2	1 2	2 2	1 2	1 2	1 2	1 1	0 0	1 2	1 1	2 2	1 2	1 1	1 1	1 2	1 1	1 1	1 1	1 2	1 2	1 1	1 2	1 2	1 2	1 2	1 2	1 1	2 2	1 2	1 1	1 2	1 1	1 2	1 1	1 1	1 2	1 1	1 1	1 1	1 2	1 1	1 1	2 2	0 0	1 2	2 2	1 1	1 1	1 2	1 1	1 1	1 1	1 1	1 1	2 2	1 2	1 1	2 2	1 2	1 2	1 2	1 2	1 2	1 1	1 2	1 1	1 2	1 2	1 2	0 0	1 2	1 2	1 2	1 1	2 2	1 1	1 2	1 1	1 2	1 2	1 2	1 1	1 1	1 2	1 1	2 2	0 0	1 1	1 2	1 2	1 1	1 1	0 0	1 2	1 1	1 1	1 2	1 1	2 2	1 1	1 1	1 1	1 2	1 1	1 2	0 0	1 2	1 2	1 2	1 1	1 2	1 2	0 0	2 2	1 2	1 1	1 1	1 2	1 1	1 2	2 2	1 1	1 1	2 2	1 2	1 2	1 2	1 1	1 1	2 2	1 2	1 1	1 2	1 1	1 2	1 2	1 1	1 2	1 1	1 2	1 2	1 1	1 1	1 1	1 2	1 2	1 1	1 2	1 1	1 2	0 0	1 1	1 2	1 1	1 1	1 2	1 1	1 1	1 1	1 1	1 2	1 1	1 1	1 1	1 2	1 1	1 2	1 2	1 2	1 2	1 2	2 2	1 2	1 1	1 1	2 2	2 2	1 1	1 1	1 2	1 2	1 2	1 1	1 2	1 2	1 1	1 2	1 1	1 1	1 2	1 1	1 2	1 1	1 1	0 0	1 2	1 1	1 1	1 1	1 2	1 2	1 1	1 2	1 1	0 0	2 2	1 1	1 1	1 1	1 1	1 1	1 2	1 1	1 2	1 1	1 2	2 2	1 1	1 1	2 2	1 2	1 1	1 2	2 2	2 2	1 2	1 1	1 1	1 1	1 1	1 1	1 1	1 1	0 0	1 2	1 1	1 2	1 2	1 1	1 2	1 2	1 2	1 1	1 2	2 2	1 2	1 2	1 1	2 2	1 1	1 2	1 1	1 2	1 2	1 2	1 2	1 1	1 2	1 2	1 2	2 2	2 2	1 1	1 1	1 2	1 1	1 2	1 1	1 2	1 1	2 2	1 1	1 1	1 1	1 1	1 2	2 2	1 2	1 2	0 0	1 1	1 2	1 1	1 2	0 0	0 0	1 2	1 2	1 1	1 2	2 2	1 2	1 1	2 2	1 2	1 2	2 2	1 2	1 1	1 2	0 0	1 1	1 1	1 1	1 2	1 1	1 2	1 1	1 2	1 2	1 2	1 2	1 1	1 2	1 1	1 2	1 1	1 1	1 2	0 0	1 1	1 2	1 2	1 2	1 2	1 1	1 1	1 1	1 1	1 2	1 1	1 2	1 1	1 1	1 1	1 1	1 1	1 2	2 2	1 1	1 1	1 2	2 2	1 1	1 2	1 1	1 1	0 0	1 2	1 1	1 1	2 2	2 2	1 1	1 1	1 1	1 2	1 1	0 0	1 2	1 1	0 0	1 2	1 1	1 1	1 2	0 0	1 1	1 2	1 2	1 1	1 2	1 1	1 2	1 2	1 1	1 2	1 1	2 2	1 1	0 0	1 2	1 1	1 2	1 2	1 2	1 1	1 1	1 1	1 1	1 2	1 1	1 1	1 2	1 2	1 1	1 1	1 1	1 2	1 1	2 2	2 2	1 2	2 2	2 2	1 2	1 2	1 2	1 1	2 2	1 1	1 1	1 1	1 1	1 1	1 1	1 2	1 1	2 2	1 1	1 1	1 2	1 1	1 2	1 1	1 2	1 2	1 2	2 2	1 1	1 1	1 1	1 1	1 2	1 1	1 1	1 1	1 2	1 2	1 1	2 2	1 1	1 2	1 1	1 1	1 2	1 2	1 1	1 1	1 2	1 2	1 1	1 1	1 1	1 2	1 1	2 2	1 1	1 1	1 2	1 1	0 0	1 2	2 2	1 1	1 2	1 1	1 1	1 1	1 1	1 1	1 2	1 1	1 2	1 1	1 1	1 1	1 2	1 1	1 2	0 0	1 1	1 1	0 0	1 2	1 2	1 1	1 1	1 2	2 2	1 1	1 1	1 2	2 2	1 2	1 2	1 2	1 2	1 1	1 2	2 2	1 1	1 1	1 1	1 2	2 2	2 2	0 0	1 1	1 2	1 1	1 2	1 1	1 2	1 1	1 1	1 1	2 2	1 2	1 2	1 1	1 2	2 2	0 0	1 1	1 2	2 2	1 1	1 2	1 2	1 2	1 1	1 2	1 2	1 1	1 2	1 2	1 2	1 1	1 2	1 1	1 1	1 2	1 1	1 2	1 1	1 2	2 2	1 1	1 1	1 1	2 2	1 2	1 2	0 0	1 2	1 1	1 1	1 1	1 2	1 1	2 2	1 1	1 2	1 2	1 2	1 2	1 1	1 1	1 1	1 2	1 2	0 0	1 1	1 2	1 1	1 2	2 2	2 2	1 2	1 2	1 1	1 2	2 2	1 2	1 1	1 2	1 2	0 0	1 1	1 2	1 2	1 1	1 1	2 2	1 1	1 2	1 1	1 1	1 1	1 1	2 2	1 1	1 1	1 1	1 1	2 2	1 2	1 1	1 1	1 2	1 2	1 2	1 2	1 2	1 2	1 2	0 0	1 1	1 1	1 1	1 1	1 2	1 1	0 0	1 2	1 1	1 2	1 1	1 2	1 2	1 1	1 1	2 2	1 2	2 2	1 2	1 2	1 2	1 2	1 1	1 1	1 1	2 2	1 1	1 2	1 1	1 2	1 1	1 2	1 1	1 1	1 1	1 1	1 2	2 2	1 2	2 2	1 2	2 2	1 1	1 1	1 1	1 1	2 2	1 1	2 2	1 2	2 2	1 1	2 2	1 1	1 2	1 2	1 2	1 2	1 1	1 1	0 0	1 2	1 2	2 2	1 1	1 1	1 1	1 1	1 2	1 2	1 1	1 1	1 1	1 1	1 2	1 2	1 1	2 2	1 2	1 1	1 2	1 2	1 2	1 1	2 2	1 1	1 1	1 2	0 0	1 2	1 1	1 1	1 2	1 1	1 2	2 2	1 2	1 2	1 1	1 1	1 1	1 2	1 1	1 2	1 1	1 2	1 2	1 1	1 2	1 1	1 1	1 2	1 1	1 1	1 1	1 2	1 1	1 1	1 1	1 2	1 1	1 2	0 0	1 1	1 2	1 1	2 2	1 1	1 2	1 2	1 1	1 1	1 2	1 1	1 2	1 2	1 2	0 0	2 2	1 1	2 2	1 1	1 2	1 1	1 2	1 1	1 1	1 1	1 1	1 1	1 2	2 2	1 1	1 2	1 2	1 1	1 2	1 2	1 1	1 2	1 2	2 2	1 1	1 2	1 1	1 1	1 2	1 1	1 1	1 1	2 2	1 1	1 2	1 2	1 2	2 2	1 1	1 2	1 2	2 2	1 2	1 1	1 1	1 2	1 2	1 1	1 2	1 2	1 2	1 1	1 1	1 2	2 2	0 0	1 1	2 2	1 2	1 2	1 2	1 2	1 2	1 1	1 2	1 1	1 1	1 1	1 1	2 2	1 1	1 2	1 1	1 2	1 1	1 1	1 1	1 2	1 1	1 1	1 2	1 2	1 2	2 2	1 1	1 2	1 2	1 1	2 2	1 2	1 2	1 1	1 2	1 1	2 2	1 1	1 2	1 1	1 1	2 2	1 1	1 1	2 2	1 1	0 0	1 1	1 1	1 1	2 2	1 1	2 2	1 2	1 1	1 1	1 1	1 2	1 2	1 2	1 2	1 1	2 2	1 2	1 1	1 2	1 1	1 1	1 2	1 1	0 0	1 1	1 1	1 1	1 1	1 1	1 1	1 2	1 1	1 1	1 2	1 2	1 2	1 2	1 1	1 1	1 1	1 1	1 2	1 2	1 2	1 2	2 2	1 2	1 2	1 1	0 0	1 1	1 2	2 2	1 1	1 2	1 1	1 2	1 2	1 1	1 1	2 2	1 1	2 2	1 2	1 1	1 2	1 1	1 2	1 1	1 2	1 1	1 2	1 2	1 2	2 2	2 2	1 2	2 2	1 2	1 2	1 2	1 2	1 1	1 2	1 1	1 2	1 1	1 2	1 1	1 1	1 2	1 2	1 2	1 1	1 2	1 2	1 2	2 2	1 1	1 2	1 2	1 2	0 0	1 2	1 1	1 2	2 2	1 2	1 2	1 2	1 1	1 2	1 1	1 2	1 2	1 2	1 2	1 2	0 0	1 1	1 2	1 2	1 2	1 2	1 2	2 2	1 2	1 1	1 2	2 2	1 2	1 1	1 2	1 1	1 1	1 1	1 2	2 2	1 1	1 1	1 1	1 2	1 2	1 1	1 2	1 2	1 2	1 2	1 1	1 1	1 2	2 2	1 2	1 2	1 2	1 2	1 2	1 2	1 2	1 2	1 1	2 2	1 1	0 0	1 2	1 1	2 2	1 2	1 2	1 1	1 2	1 1	1 2	1 1	1 2	1 1	1 1	1 2	1 1	1 1	1 1	1 1	1 1	1 1	2 2	1 1	1 1	1 1	1 1	1 2	1 2	1 2	1 2	1 1	1 1	1 2	1 1	1 2	1 1	1 2	1 1	2 2	0 0	1 1	1 2	1 1	1 1	1 2	1 2	1 2	1 2	1 2	1 1	1 2	1 2	1 1	1 1	1 1	1 2	1 1	1 2	1 2	1 2	1 2	1 1	1 1	1 2	1 2	2 2	1 2	1 1	1 1	1 2	2 2	1 1	1 1	1 1	1 1	1 2	1 1	1 1	1 2	1 1	1 1	2 2	1 1	1 2	2 2	2 2	1 1	1 1	1 2	1 2	1 1	2 2	1 1	1 1	0 0	1 1	1 1	1 1	1 2	2 2	1 1	1 1	1 1	0 0	1 2	1 2	1 2	1 2	1 1	1 1	1 2	1 1	1 2	1 1	1 1	0 0	1 2	1 2	1 1	1 2	1 2	1 1	1 1	1 1	1 1	1 1	0 0	2 2	1 1	1 1	1 2	1 1	1 2	1 2	1 2	1 1	2 2	1 1	1 1	1 1	1 2	0 0	1 2	1 1	1 2	0 0	1 1	1 2	1 2	1 2	1 1	1 2	1 1	1 2	0 0	1 2	1 1	1 2	1 2	1 2	1 1	1 1	1 2	1 1	0 0	1 1	1 1	1 2	1 1	1 1	2 2	1 1	1 2	1 2	1 1	1 2	1 2	1 2	1 2	1 2	1 2	1 1	1 1	1 1	0 0	2 2	1 1	1 1	1 2	1 1	1 1	1 1	1 2	1 2	1 2	1 2	1 2	1 2	1 2	2 2	2 2	1 2	1 2	0 0	1 1	1 1	1 2	1 1	1 2	1 1	1 2	1 2	1 2	1 2	0 0	1 1	1 1	1 1	1 1	1 2	1 2	1 2	1 1	1 2	1 1	1 2	0 0	1 2	1 1	1 2	1 1	1 1	1 2	1 1	1 1	2 2	1 2	1 2	1 2	1 1	1 1	1 2	0 0	1 2	1 1	1 1	1 2	1 1	1 1	1 1	2 2	1 2	1 1	1 2	1 2	1 2	1 1	1 2	1 1	1 2	1 1	1 1	1 2	1 1	1 2	1 1	1 2	1 1	1 2	1 1	1 1	1 1	1 2	2 2	1 2	1 2	2 2	1 2	1 2	1 1	1 2	2 2	1 2	1 2	1 2	1 2	1 1	1 1	1 1	0 0	1 2	1 2	1 2	1 1	1 1	1 2	1 1	1 1	1 1	1 2	1 2	1 2	1 2	2 2	1 2	1 1	1 1	1 1	1 1	1 2	1 1	1 2	1 1	1 2	2 2	1 1	1 1	2 2	1 1	2 2	1 1	1 1	1 2	1 2	2 2	1 1	0 0	1 1	2 2	1 2	1 2	1 2	1 2	1 1	1 1	2 2	1 2	1 2	1 1	1 2	1 2	1 2	1 1	1 1	1 2	1 1	1 2	1 1	1 2	1 2	1 2	1 1	1 1	1 1	1 2	1 2	1 1	1 2	1 1	1 2	1 2	1 1	1 2	1 1	1 2	1 2	2 2	1 1	1 1	1 1	1 1	1 2	1 1	1 2	1 2	2 2	1 1	1 2	1 1	1 1	1 1	1 1	1 1	1 1	1 1	1 2	1 1	1 2	1 1	1 1	1 2	1 2	1 1	2 2	1 2	1 2	1 1	2 2	1 1	0 0	1 2	1 2	1 1	1 1	1 1	1 2	1 1	1 2	1 1	1 1	1 1	1 2	1 2	1 2	1 2	1 2	1 2	1 1	1 2	1 1	1 2	1 1	1 1	1 1	1 2	1 1	1 2	2 2	1 1	1 1	1 2	1 2	1 1	1 1	1 2	1 2	1 1	1 1	1 2	1 2	1 1	1 2	1 2	1 1	1 1	1 1	1 1	2 2	1 1	1 2	1 2	1 1	1 2	1 1	2 2	1 1	2 2	1 1	1 1	1 1	1 1	1 2	1 2	1 2	2 2	1 2	1 1	1 2	0 0	1 1	1 1	1 1	1 1	2 2	1 1	2 2	1 1	1 1	2 2	1 2	1 1	1 1	1 1	1 1	1 2	1 2	1 2	1 1	1 2	1 1	1 1	1 1	1 2	1 1	1 1	1 1	2 2	1 2	1 2	2 2	1 2	1 2	1 1	1 1	1 1	1 2	1 2	1 2	1 2	1 2	1 1	2 2	1 2	1 2	1 1	1 1	2 2	1 1	1 1	1 1	1 2	1 1	1 2	1 1	2 2	1 1	1 1	1 2	1 1	1 1	1 1	2 2	1 2	2 2	1 2	2 2	1 1	1 1	1 1	1 2	1 2	1 1	1 2	1 2	1 2	1 2	1 2	1 1	1 2	1 1	1 1	1 1	1 2	1 1	2 2	1 1	1 2	1 1	1 1	1 2	1 2	1 2	1 2	1 1	1 1	1 1	1 1	1 2	1 2	1 2	1 2	1 1	1 1	1 2	1 1	1 2	1 2	1 2	1 1	1 2	1 1	1 2	1 1	1 1	0 0	1 1	1 1	1 1	1 1	1 1	2 2	1 1	1 2	1 2	1 1	1 1	2 2	1 1	1 2	1 1	1 2	1 2	1 1	1 1	1 1	1 1	1 2	1 1	1 2	1 1	1 1	1 1	1 1	1 2	1 1	1 1	1 2	1 1	1 1	1 2	1 2	1 1	2 2	1 2	1 2	1 1	1 1	1 1	1 1	1 2	1 2	1 2	1 1	1 1	1 2	1 2	1 2	1 1	1 1	1 2	1 1	1 2	1 1	0 0	1 1	2 2	1 2	1 2	1 2	1 1	1 1	1 2	1 2	1 2	1 2	1 2	1 1	2 2	1 2	0 0	1 1	1 2	1 2	1 2	1 2	1 2	1 2	1 2	1 1	1 2	1 1	2 2	1 2	1 1	2 2	1 2	1 1	1 1	1 1	1 2	1 2	1 2	1 1	1 1	1 1	0 0	1 1	1 2	1 1	1 1	1 2	1 1	1 1	1 1	1 1	1 2	1 1	1 1	1 1	0 0	1 2	1 2	1 1	2 2	1 1	1 2	1 1	1 1	1 2	1 2	1 2	2 2	2 2	2 2	1 1	2 2	1 1	1 2	1 2	1 1	1 2	1 1	1 1	1 2	0 0	1 2	1 2	2 2	1 1	1 2	1 2	2 2	1 1	1 1	1 2	1 1	2 2	1 1	1 1	1 1	1 1	1 2	1 1	1 1	1 1	1 2	1 2	1 1	2 2	1 2	2 2	1 1	1 2	0 0	1 1	0 0	1 2	1 2	1 2	1 2	1 2	1 1	1 1	1 1	1 2	1 1	1 2	1 1	1 1	1 1	1 2	1 1	1 2	1 2	1 2	1 2	1 2	1 1	1 1	1 1	1 2	1 1	1 1	1 2	1 2	1 2	1 2	1 2	1 1	1 1	1 2	1 1	1 1	1 1	1 2	1 1	1 1	1 2	1 2	1 2	1 2	2 2	1 1	1 2	0 0	1 2	1 1	1 1	1 1	1 1	1 2	0 0	1 1	1 2	1 1	1 2	1 1	0 0	1 2	1 1	0 0	1 1	1 2	1 2	1 2	1 2	1 1	1 2	1 2	1 2	1 1	1 1	1 1	1 2	1 1	0 0	1 1	2 2	1 1	1 1	1 1	1 1	2 2	1 2	1 1	1 2	1 1	1 2	1 2	1 2	1 1	1 2	1 1	1 1	2 2	1 2	2 2	1 1	1 2	1 2	2 2	0 0	1 1	1 1	1 1	1 2	1 2	1 2	1 2	1 1	1 2	1 2	1 2	1 1	1 2	1 2	1 1	1 1	0 0	1 1	1 2	1 1	1 1	1 2	2 2	1 1	1 1	1 2	1 1	1 1	1 1	1 2	0 0	1 1	1 2	1 1	2 2	1 1	1 2	1 2	1 1	0 0	1 1	2 2	1 2	2 2	1 2	1 1	1 1	2 2	1 1	1 1	1 1	1 2	1 2	1 1	1 2	1 1	1 1	2 2	1 1	1 2	1 2	1 1	1 1	1 1	1 2	1 1	2 2	1 1	2 2	1 1	1 1	1 2	1 2	1 2	1 1	1 1	1 1	1 1	1 2	1 1	1 1	1 1	1 2	2 2	1 1	1 1	1 1	1 2	1 2	1 1	2 2	1 2	1 2	2 2	2 2	1 1	1 1	1 1	1 2	1 2	1 2	1 2	1 1	2 2	1 2	2 2	1 1	1 2	1 1	1 1	1 2	1 2	1 1	1 2	1 1	1 1	1 2	1 1	1 2	1 2	1 2	1 1	1 2	1 1	1 1	1 2	2 2	1 2	1 1	1 1	1 1	0 0	1 1	2 2	1 1	1 2	1 1	1 2	1 2	1 1	1 1	1 2	1 1	1 2	1 2	1 1	1 2	1 1	1 2	1 1	1 1	1 1	1 1	1 2	1 2	1 2	1 1	1 1	1 2	1 2	1 1	1 1	1 1	1 2	1 1	1 1	1 2	2 2	1 2	1 1	1 1	2 2	1 2	2 2	1 1	1 1	1 1	1 2	1 2	1 1	1 1	1 2	1 1	1 1	1 1	1 2	1 1	1 1	1 2	1 2	0 0	1 1	1 2	1 2	1 1	1 1	1 1	1 1	1 2	1 2	1 1	0 0	1 1	1 1	2 2	1 2	1 1	1 2	1 1	2 2	1 2	1 2	1 1	1 2	1 2	1 1	2 2	1 1	0 0	1 1	1 2	1 2	1 1	2 2	2 2	1 2	1 1	1 2	0 0	1 1	1 2	1 1	1 2	1 2	1 1	1 1	2 2	2 2	1 1	1 1	2 2	2 2	1 2	2 2	1 1	0 0	1 1	1 1	1 2	1 1	1 2	2 2	1 1	1 2	2 2	1 1	1 2	1 2	1 2	1 1	1 1	1 2	2 2	1 1	0 0	1 1	1 1	1 1	1 2	1 2	1 1	1 1	1 1	1 1	1 2	1 1	1 2	1 2	1 2	2 2	2 2	1 1	1 2	1 2	1 1	1 2	2 2	1 1	1 2	1 2	1 2	1 2	1 2	1 1	1 1	1 2	1 2	1 2	1 1	1 2	2 2	1 1	2 2	1 1	1 2	1 2	1 1	1 1	1 2	1 2	1 1	1 1	1 2	1 2	1 2	1 1	1 2	1 2	1 2	1 1	1 2	1 1	1 2	1 1	1 2	2 2	0 0	1 2	1 2	0 0	1 1	2 2	1 1	1 1	1 1	1 1	1 2	1 2	1 1	2 2	1 1	1 1	1 1	1 2	1 1	1 1	1 1	1 1	1 2	1 1	2 2	2 2	1 2	1 2	1 2	1 1	1 1	1 2	0 0	1 2	1 1	1 2	1 2	1 1	1 2	1 2	2 2	2 2	1 2	1 2	1 2	1 2	2 2	2 2	1 1	1 2	1 1	1 2	1 1	1 1	1 1	1 2	1 2	2 2	1 1	1 2	1 1	1 1	1 2	1 2	2 2	1 2	1 1	1 2	1 2	2 2	1 2	1 1	1 1	1 2	1 1	1 1	1 2	1 2	1 1	1 2	1 1	1 2	1 2	1 1	1 2	2 2	1 1	1 1	1 1	0 0	1 2	1 1	1 2	1 1	0 0	1 2	0 0	1 2	1 2	1 1	1 2	1 2	1 1	1 1	1 2	1 2	1 1	1 1	1 2	2 2	1 2	1 2	1 2	1 1	0 0	1 2	1 1	1 1	2 2	1 1	2 2	1 1	1 1	2 2	1 1	1 2	1 2	1 1	1 1	2 2	1 1	1 1	2 2	1 1	1 2	1 1	1 2	1 1	0 0	1 2	1 1	1 2	1 2	1 2	1 2	1 2	1 1	1 1	1 2	1 1	0 0	1 1	0 0	1 2	1 2	1 2	1 1	1 2	2 2	2 2	2 2	1 2	1 1	1 2	1 2	1 2	1 1	1 2	1 1	1 1	1 2	1 1	1 1	1 2	1 2	1 1	1 1	1 2	1 2	1 1	1 2	1 2	1 1	1 2	1 2	1 1	1 1	1 2	1 1	1 1	1 1	1 1	1 1	1 2	1 1	1 1	2 2	1 2	1 2	2 2	2 2	1 1	1 2	1 1	1 2	1 1	1 2	1 2	1 2	1 1	1 1	1 1	1 1	1 1	1 1	2 2	1 2	1 1	1 2	1 2	1 2	1 2	1 2	1 2	1 1	1 2	1 1	1 1	1 1	1 1	1 2	2 2	1 1	1 1	1 2	1 2	1 1	2 2	1 2	1 2	1 2	1 1	1 1	2 2	1 2	1 1	1 1	2 2	1 1	1 1	1 2	1 1	1 2	1 1	2 2	2 2	1 1	1 2	1 1	1 1	0 0	1 2	1 1	0 0	1 1	1 2	2 2	1 1	2 2	1 2	1 2	1 2	1 2	1 1	1 2	0 0	2 2	1 2	1 2	1 1	1 1	1 2	1 2	1 1	1 1	1 1	1 2	1 2	1 2	1 1	1 1	1 2	1 2	1 1	1 1	1 1	2 2	1 1	2 2	1 2	1 1	1 1	1 2	1 1	1 1	1 1	1 1	1 1	1 2	1 1	1 2	1 2	2 2	1 1	1 2	1 2	1 2	1 1	0 0	1 1	1 2	1 1	1 1	1 1	1 1	1 1	1 1	1 2	1 1	1 2	1 2	1 2	1 2	1 1	1 1	1 2	1 2	1 1	1 1	1 2	1 2	1 2	1 1	1 2	1 1	0 0	1 1	1 1	1 1	1 2	1 1	2 2	1 2	2 2	1 1	1 1	1 1	1 1	1 2	1 2	1 2	2 2	1 2	1 2	1 1	1 1	1 1	2 2	1 2	1 2	2 2	1 1	1 2	1 2	1 1	2 2	1 1	2 2	1 2	1 2	1 1	1 2	1 2	1 2	1 2	1 2	1 2	2 2	1 2	1 2	1 1	1 1	1 2	1 1	1 1	1 1	2 2	1 2	1 1	1 1	1 1	1 1	1 2	1 2	2 2	1 1	1 2	1 1	1 2	1 2	1 1	1 2	1 1	1 2	1 2	1 1	1 1	1 1	2 2	1 1	1 1	1 2	1 1	1 2	1 1	1 1	1 2	1 1	1 1	2 2	1 2	1 1	1 2	2 2	1 1	1 1	1 2	2 2	1 1	1 2	1 2	1 1	1 2	0 0	1 2	1 1	0 0	1 1	2 2	1 1	1 2	0 0	1 2	1 2	1 1	1 2	1 1	1 1	0 0	1 1	2 2	1 1	1 1	1 1	1 1	1 1
1	007.x1.GQI119	800.x1.GQI122	400.x1.GQI122	0	0	1 1	2 2	1 2	2 2	1 2	1 1	1 1	1 2	1 2	1 2	1 2	1 2	1 2	1 2	1 1	1 2	1 2	1 1	1 2	1 2	1 1	1 1	1 1	2 2	1 1	1 1	1 2	2 2	1 2	1 1	1 2	1 2	2 2	2 2	1 1	1 1	1 1	1 2	1 1	1 1	1 1	2 2	0 0	1 1	2 2	1 1	2 2	1 1	1 1	1 1	1 2	1 1	1 1	1 2	1 2	1 1	1 2	1 2	1 2	0 0	2 2	2 2	1 1	1 1	1 1	1 2	2 2	1 2	1 1	1 2	0 0	1 1	1 1	0 0	1 2	1 2	2 2	1 2	2 2	1 1	1 2	1 1	1 1	1 1	1 2	1 1	1 2	1 2	1 2	1 1	1 1	2 2	1 1	2 2	1 1	1 2	1 2	1 1	1 2	1 1	1 1	1 1	1 2	1 1	1 2	2 2	1 1	1 2	1 2	1 2	1 2	2 2	1 2	1 2	1 1	1 1	1 2	2 2	1 1	1 1	1 1	1 2	1 1	1 2	1 2	1 2	1 1	1 2	1 2	1 2	1 2	1 2	1 2	1 2	1 2	2 2	1 1	1 1	1 1	1 2	1 2	1 2	1 1	1 2	1 2	1 2	1 2	1 2	1 2	1 2	0 0	1 1	1 2	1 2	1 2	1 1	2 2	1 2	2 2	1 2	1 2	1 1	1 2	2 2	1 2	1 2	1 1	1 1	1 1	1 1	1 2	1 1	1 1	2 2	2 2	2 2	1 1	1 2	1 2	1 1	1 2	1 2	1 2	1 1	2 2	1 2	1 1	1 2	2 2	1 1	1 2	1 1	1 1	1 2	1 1	2 2	0 0	1 2	1 1	1 1	1 2	1 1	1 2	1 2	1 1	1 2	1 2	2 2	1 2	1 2	1 1	1 1	1 1	1 2	1 1	1 2	1 2	1 1	1 2	1 1	1 1	1 1	2 2	1 2	2 2	1 1	1 1	1 1	1 2	1 1	1 1	1 1	1 2	1 2	1 2	1 2	1 1	1 2	1 2	1 1	1 2	1 2	1 1	1 2	1 1	2 2	1 1	1 1	1 2	1 2	1 1	1 1	1 1	1 2	1 1	1 1	1 2	2 2	0 0	1 2	1 2	1 2	1 2	1 1	1 1	0 0	1 2	1 1	1 2	1 1	1 2	1 1	1 2	1 1	2 2	1 2	1 2	1 1	1 1	1 2	1 2	1 2	1 2	1 2	1 1	1 1	1 1	1 2	1 1	1 2	1 2	1 1	1 1	1 1	1 1	1 2	1 2	1 1	2 2	1 2	1 1	2 2	1 2	1 1	1 2	1 2	2 2	1 2	1 2	1 2	1 1	1 1	1 1	1 1	1 2	1 1	1 1	1 2	1 1	1 2	1 2	1 1	1 1	1 1	1 2	1 2	1 2	1 1	1 2	1 1	1 1	1 2	1 2	1 2	1 2	1 2	1 2	1 2	1 2	1 2	1 1	1 2	1 2	1 2	1 1	1 1	1 2	1 2	1 1	2 2	1 1	1 2	1 1	1 2	1 2	2 2	1 2	1 2	1 2	2 2	1 2	1 2	1 2	1 2	1 2	1 2	1 1	1 2	1 1	1 1	1 2	2 2	1 2	1 1	1 1	1 2	1 1	1 2	1 2	0 0	1 1	2 2	1 2	1 2	1 1	1 1	1 2	1 1	1 1	1 1	1 1	1 1	1 1	1 2	1 2	1 2	0 0	2 2	1 2	1 1	1 2	1 1	2 2	1 2	1 2	1 2	1 2	1 2	1 2	1 1	2 2	1 1	1 1	1 2	1 1	1 1	1 1	1 2	1 2	1 1	1 2	1 2	1 1	1 1	1 1	1 2	1 1	1 2	1 2	1 2	1 2	1 2	1 1	1 2	1 1	1 1	1 2	1 2	1 2	1 1	1 2	2 2	1 2	1 2	1 2	1 1	1 2	1 2	1 1	1 2	1 1	1 1	1 1	0 0	0 0	1 2	1 2	1 1	1 1	1 1	1 2	1 1	0 0	1 2	2 2	1 1	0 0	1 2	1 2	1 2	1 2	1 1	1 1	1 1	1 2	1 1	1 2	0 0	1 1	1 1	1 1	2 2	1 1	1 1	2 2	1 2	1 2	1 1	1 1	0 0	1 1	1 1	1 2	1 1	1 1	1 1	1 1	1 1	1 1	1 2	1 1	1 2	2 2	1 1	2 2	0 0	2 2	1 1	1 1	2 2	1 2	1 1	1 2	1 2	1 1	1 2	1 1	1 1	2 2	1 1	1 1	1 1	1 2	1 1	1 2	1 1	1 1	1 2	1 1	1 2	1 1	1 1	1 1	1 2	1 2	1 1	1 1	1 1	1 2	1 2	1 1	1 1	1 2	1 1	1 2	1 1	1 2	2 2	2 2	1 2	1 2	1 2	1 1	1 1	1 2	1 2	1 2	1 2	1 1	1 1	1 1	1 2	2 2	1 1	1 2	1 1	1 2	1 1	1 1	1 2	1 1	1 2	1 2	1 2	1 1	1 1	1 1	1 2	1 2	1 1	1 1	1 2	1 2	1 1	1 2	1 2	2 2	1 2	1 1	0 0	1 1	1 2	1 2	1 2	1 1	1 2	1 2	1 2	1 1	2 2	1 1	1 2	1 1	1 2	1 2	2 2	1 1	1 1	0 0	1 2	1 2	1 2	1 1	1 2	2 2	1 1	2 2	1 1	1 2	1 2	1 2	2 2	1 1	1 2	1 1	1 1	1 2	1 1	1 2	1 1	1 1	1 1	1 1	1 1	1 1	2 2	1 2	1 2	1 1	1 1	0 0	1 1	1 2	1 2	1 2	1 1	1 1	1 1	1 2	1 1	1 1	1 1	1 1	1 2	1 2	1 1	1 1	1 1	2 2	2 2	2 2	1 2	1 2	0 0	1 2	1 2	1 2	1 1	1 1	1 1	1 1	1 2	1 2	1 2	1 1	1 2	1 1	1 1	1 2	1 2	1 2	1 1	1 1	1 2	1 2	1 2	1 1	1 1	1 1	1 1	1 1	2 2	1 1	1 2	1 2	2 2	1 2	1 2	1 1	2 2	1 1	1 2	1 1	1 2	1 2	1 2	1 2	1 2	1 2	1 1	0 0	1 1	1 1	1 2	1 2	1 1	1 1	1 2	1 1	1 1	1 2	1 2	1 1	1 2	1 1	1 1	1 2	1 2	1 2	0 0	1 2	1 1	1 2	1 1	2 2	1 2	2 2	1 2	2 2	1 2	1 1	2 2	1 1	1 1	1 1	1 2	1 1	1 2	1 2	1 1	1 2	1 2	1 1	1 2	1 2	1 1	1 2	1 1	2 2	1 1	1 1	2 2	1 2	1 2	1 1	1 1	1 2	1 2	1 1	1 2	1 2	1 1	1 2	1 1	1 2	1 2	1 2	1 1	1 2	1 2	1 2	1 2	1 2	1 1	1 2	1 1	1 2	1 2	1 2	1 2	1 2	1 2	1 2	1 1	1 1	1 1	1 1	1 1	1 1	1 1	1 1	1 1	1 2	1 1	1 2	1 2	1 2	1 2	1 1	1 1	1 2	0 0	1 2	1 2	1 2	1 2	1 1	1 1	1 1	1 1	1 2	1 2	1 2	1 1	1 1	1 1	2 2	2 2	1 2	1 2	1 2	1 2	1 2	1 2	1 1	1 1	1 2	1 2	1 2	1 1	2 2	1 2	1 2	1 2	1 1	1 2	1 1	1 1	1 1	1 1	1 2	1 2	1 1	1 1	1 2	1 2	1 2	1 1	1 2	1 1	1 2	2 2	1 2	1 1	1 2	1 1	1 1	1 1	1 1	1 1	2 2	1 1	1 1	1 2	1 2	2 2	1 2	1 1	1 1	1 2	1 1	1 1	1 1	1 2	1 2	1 2	1 1	1 2	1 2	1 1	2 2	1 2	1 1	1 2	1 1	1 1	1 1	1 1	1 1	1 1	1 1	1 2	1 1	1 1	2 2	1 1	1 1	1 2	1 2	1 1	1 1	1 2	1 1	1 2	1 2	1 1	1 2	1 1	1 1	1 2	1 1	1 1	1 2	1 1	1 1	1 2	0 0	1 2	1 2	1 2	1 1	1 1	1 2	1 1	1 2	1 1	1 1	1 1	1 2	1 1	1 1	1 2	1 1	1 2	1 2	2 2	1 2	1 1	1 1	1 1	1 1	1 1	1 1	1 1	1 1	1 2	1 1	1 2	1 2	1 2	1 1	1 1	1 1	0 0	1 2	1 2	1 2	1 1	1 2	1 2	1 1	2 2	1 2	1 1	1 2	2 2	1 1	1 1	1 1	1 1	1 2	2 2	1 2	2 2	2 2	1 2	1 2	1 2	1 2	2 2	1 1	1 2	1 1	1 1	2 2	1 1	1 1	1 2	1 2	1 2	1 1	1 1	1 2	1 1	1 2	1 2	1 1	1 2	2 2	1 2	1 2	1 2	1 2	1 2	1 1	1 1	1 2	1 2	1 2	1 2	2 2	1 1	1 1	2 2	1 1	1 1	1 2	1 2	1 1	1 1	1 2	1 1	1 1	1 1	1 2	1 1	1 2	1 2	1 1	1 1	1 2	1 2	1 2	1 1	1 2	1 1	1 2	1 1	1 2	1 1	1 1	1 1	1 2	1 1	1 2	1 1	1 2	1 2	1 1	1 2	1 1	1 2	1 1	1 1	1 2	1 1	1 1	1 2	1 2	1 1	1 1	1 2	1 1	1 2	1 2	1 1	2 2	1 2	1 2	1 1	1 1	1 2	1 1	2 2	1 1	1 1	1 2	2 2	1 2	1 1	1 2	1 2	1 2	1 1	1 2	1 2	1 1	1 1	1 1	1 2	0 0	1 2	1 1	1 2	1 1	1 2	1 1	1 1	1 2	1 1	1 1	1 1	1 2	1 1	1 2	1 2	1 2	1 1	2 2	1 2	1 1	2 2	1 2	1 2	1 2	1 2	1 1	1 2	1 2	2 2	1 1	1 1	1 1	1 2	1 2	0 0	1 1	1 2	1 2	1 2	2 2	1 1	1 2	1 2	1 1	1 2	1 1	1 1	1 1	1 2	1 2	2 2	1 2	1 1	1 1	1 2	1 2	1 2	1 2	1 1	1 1	1 2	1 1	1 1	1 2	1 2	1 2	2 2	1 2	2 2	1 2	1 1	1 1	1 1	1 2	1 1	2 2	1 2	1 1	1 1	1 2	1 1	1 2	1 1	1 1	1 1	1 2	1 2	1 2	1 2	1 1	1 1	0 0	1 2	1 2	1 2	1 1	1 2	1 1	2 2	1 2	1 1	1 2	1 2	1 1	1 2	1 2	1 1	1 1	1 2	1 2	1 2	1 2	1 2	1 1	1 1	2 2	1 1	1 2	1 2	1 1	1 1	1 1	1 1	1 2	1 2	1 2	1 1	1 1	1 2	1 1	1 2	1 2	1 2	1 1	1 2	1 2	1 1	1 2	1 2	1 2	1 1	1 1	1 1	1 2	1 1	1 2	1 1	1 1	2 2	2 2	1 2	1 2	1 1	1 2	1 1	2 2	1 2	1 1	1 2	1 1	1 1	1 1	1 1	1 2	1 2	1 1	1 1	1 2	1 1	1 2	1 2	1 1	1 1	1 1	2 2	1 2	1 2	1 2	1 2	0 0	1 1	1 2	1 1	1 2	2 2	1 1	1 1	1 2	1 2	1 2	1 2	1 2	1 1	1 1	1 1	1 1	1 1	1 1	1 1	1 2	1 1	1 2	1 2	1 1	1 2	1 1	1 2	1 1	1 1	1 2	1 1	1 2	1 1	1 1	1 2	1 1	1 2	1 1	1 2	1 2	2 2	1 2	1 1	1 1	1 2	1 1	1 2	1 1	1 2	1 1	1 1	1 2	1 2	1 2	1 1	1 1	1 2	1 2	2 2	1 1	1 2	1 1	2 2	1 2	2 2	1 2	1 2	1 1	1 2	1 1	1 1	1 2	1 2	1 2	1 1	0 0	1 2	2 2	1 1	1 1	1 2	1 1	1 1	1 1	1 1	1 2	1 1	1 2	2 2	1 1	1 2	0 0	1 1	0 0	1 2	1 1	1 1	1 1	1 1	1 2	1 1	1 2	1 1	1 1	1 1	1 1	1 2	1 2	1 1	1 2	1 1	1 1	1 2	1 2	1 2	1 2	1 1	1 1	1 1	1 2	1 1	2 2	1 1	2 2	1 2	1 1	1 1	1 2	1 1	2 2	1 2	1 2	1 1	1 1	1 1	1 1	1 2	1 1	1 2	1 2	2 2	1 1	1 2	1 2	1 1	1 2	1 1	1 1	1 1	1 2	1 2	1 2	1 2	1 1	1 1	1 1	1 2	1 2	1 2	1 1	1 1	1 2	1 1	1 1	1 2	1 1	1 1	1 2	1 2	2 2	1 1	1 1	1 2	1 2	1 2	1 1	1 1	1 1	1 2	1 2	1 2	2 2	1 2	2 2	1 1	1 1	2 2	0 0	1 1	1 2	1 1	1 1	1 1	1 2	2 2	1 2	1 1	1 2	0 0	1 2	1 2	1 2	1 1	1 1	1 1	1 2	1 1	1 1	2 2	1 1	1 2	1 1	1 2	1 2	1 1	1 2	1 2	1 1	1 1	1 2	1 2	1 2	1 2	1 2	2 2	1 1	1 1	1 2	1 2	1 2	1 2	1 2	1 1	1 2	1 1	1 1	2 2	1 2	1 2	2 2	1 1	1 1	1 2	1 2	1 1	1 1	2 2	2 2	1 2	1 1	1 2	0 0	1 1	1 1	1 2	1 1	1 2	1 1	1 1	1 2	1 1	2 2	1 2	1 1	1 1	2 2	1 1	1 2	1 2	2 2	1 2	1 1	1 1	1 2	1 2	2 2	1 1	1 1	1 1	1 2	1 2	1 1	1 2	1 2	1 2	1 1	1 1	1 2	1 2	1 1	1 1	1 2	1 2	1 1	1 1	2 2	2 2	1 2	1 2	1 2	1 2	1 2	1 2	2 2	1 1	1 1	1 1	1 2	1 1	1 2	1 2	1 1	1 2	1 1	1 2	2 2	2 2	1 1	1 1	1 2	1 2	1 2	1 2	1 1	1 2	1 2	1 2	1 1	1 2	1 2	2 2	1 1	1 1	1 1	1 1	1 2	0 0	2 2	1 2	1 2	1 1	2 2	1 1	1 1	1 2	1 1	1 2	1 1	1 2	1 2	1 2	1 2	1 2	2 2	1 2	1 2	1 2	1 2	1 2	1 1	1 1	1 1	1 2	2 2	1 2	1 2	2 2	1 2	1 2	1 2	1 2	1 2	1 2	1 1	1 1	1 2	1 2	1 1	1 1	1 2	1 1	1 1	1 1	2 2	1 1	1 2	1 2	0 0	1 1	1 1	1 1	1 2	1 2	1 1	1 1	1 1	1 2	1 2	1 2	1 1	1 1	1 2	1 2	1 2	1 1	2 2	1 2	1 1	1 2	0 0	1 1	0 0	1 1	1 1	2 2	1 1	1 2	1 2	1 2	1 1	1 2	1 2	1 2	1 1	1 2	1 2	1 2	1 1	1 2	1 2	1 2	1 1	1 2	1 2	1 1	1 2	2 2	1 1	1 2	1 2	1 2	2 2	1 2	1 2	1 2	2 2	2 2	1 1	1 1	1 2	1 1	1 1	0 0	1 2	1 1	1 2	1 2	1 2	2 2	1 1	1 1	2 2	1 2	1 2	1 1	1 2	1 2	1 2	1 1	1 1	1 2	1 2	1 2	1 2	1 1	1 2	1 1	1 1	1 2	1 2	1 2	1 2	2 2	1 1	1 1	1 2	2 2	1 1	1 2	1 2	1 2	1 2	1 2	1 2	2 2	1 2	1 1	1 2	1 1	1 2	1 1	1 1	1 1	1 1	1 2	1 2	1 2	0 0	1 2	1 1	1 2	1 1	1 1	1 1	1 1	1 2	1 1	1 1	1 1	1 1	1 2	1 2	1 1	1 2	1 2	0 0	1 1	1 1	1 1	1 2	1 2	1 2	1 1	1 1	1 1	1 1	1 1	1 1	2 2	0 0	1 2	2 2	1 1	1 1	1 1	1 1	1 2	1 2	2 2	1 1	1 2	1 1	1 1	1 1	1 1	1 2	1 1	1 2	1 1	1 1	1 2	1 2	1 2	1 1	1 2	1 1	1 2	1 2	1 2	1 1	2 2	1 2	1 1	1 1	1 1	1 2	1 2	1 1	1 1	2 2	1 2	1 2	0 0	2 2	1 1	1 1	1 1	1 2	1 2	2 2	2 2	1 2	0 0	1 2	1 2	1 1	1 2	2 2	1 2	1 2	1 2	2 2	0 0	1 1	1 2	1 2	2 2	1 2	1 2	1 2	2 2	1 2	1 1	1 1	1 2	1 2	1 1	1 2	1 2	1 2	1 1	1 2	1 1	1 1	1 1	1 1	1 2	1 2	1 1	1 1	1 1	1 1	1 2	1 2	1 2	1 1	1 1	1 1	1 1	1 2	1 2	1 2	1 1	1 1	1 1	1 1	1 2	1 2	1 2	1 1	1 2	1 2	1 2	1 2	1 1	1 2	1 2	2 2	2 2	2 2	1 1	1 1	1 1	1 2	1 2	1 1	1 1	1 2	1 1	1 2	1 2	1 1	1 2	1 2	1 2	1 1	1 2	2 2	1 2	1 2	1 1	1 1	1 2	1 1	1 2	1 1	1 2	1 1	1 1	2 2	1 2	2 2	1 2	1 2	1 1	1 1	2 2	1 2	1 1	1 1	0 0	1 2	1 1	1 2	1 1	1 2	1 2	1 1	1 2	1 1	1 1	1 1	1 2	1 1	1 1	2 2	1 2	1 2	1 1	1 1	1 2	2 2	1 2	1 1	0 0	1 1	1 1	1 1	2 2	1 2	1 2	1 1	1 2	1 2	1 1	2 2	1 1	1 2	1 1	2 2	1 1	1 1	1 2	1 2	1 1	2 2	1 1	1 2	1 2	1 1	1 1	1 2	1 1	1 1	0 0	1 1	1 2	1 1	2 2	1 2	1 2	2 2	1 2	1 2	1 2	1 2	1 1	1 1	1 2	1 2	0 0	1 1	1 2	1 2	1 2	1 1	1 2	1 1	1 2	1 1	1 1	1 2	1 1	1 1	1 1	1 2	1 2	1 2	1 2	1 2	1 1	1 2	1 1	1 1	0 0	1 2	1 2	1 1	1 1	1 2	1 1	2 2	1 2	1 1	2 2	1 2	1 1	1 2	1 1	1 2	1 2	1 2	1 2	1 1	1 2	1 2	2 2	1 2	1 2	1 2	1 1	1 2	1 1	1 2	1 2	1 2	2 2	1 2	2 2	1 1	2 2	1 2	1 2	1 1	1 2	1 1	1 2	1 1	1 2	1 1	2 2	1 1	2 2	1 1	1 1	1 1	1 2	1 1	2 2	1 2	1 2	1 2	1 1	1 2	1 1	2 2	1 2	1 2	1 2	1 1	1 1	1 2	2 2	1 2	1 2	1 1	1 1	0 0	1 1	0 0	1 1	1 1	1 2	1 2	1 2	2 2	1 1	1 1	1 2	1 2	1 1	1 2	1 2	1 2	1 2	1 1	1 1	1 1	1 2	1 2	1 2	1 2	1 2	1 1	1 1	1 1	1 1	1 2	1 2	2 2	1 2	1 1	1 1	1 1	1 1	1 1	1 2	1 2	1 2	1 2	1 1	1 1	1 1	1 1	1 2	1 1	1 1	2 2	1 1	1 1	2 2	1 2	1 1	1 2	1 2	1 2	1 1	1 2	1 1	1 1	1 2	1 2	2 2	1 1	1 1	1 2	1 2	1 2	1 2	1 2	1 1	1 1	1 1	1 2	1 1	1 1	1 1	1 2	1 2	1 2	1 2	1 2	1 2	1 2	1 2	1 1	1 2	1 2	1 1	2 2	1 1	1 1	1 1	1 1	1 1	1 1	1 1	1 2	1 1	1 1	1 1	1 1	1 2	2 2	1 2	1 2	1 1	1 2	1 1	1 1	2 2	1 1	1 2	1 1	1 2	1 1	1 1	1 2	1 1	1 2	1 1	1 1	1 2	1 1	1 1	1 1	1 1	1 1	1 2	1 2	1 2	1 2	2 2	1 1	1 1	1 2	1 1	2 2	1 2	1 1	0 0	1 1	1 1	1 2	1 2	1 1	1 2	1 2	1 2	1 1	1 2	1 2	1 2	1 1	1 2	1 1	1 1	1 2	1 2	1 1	1 2	1 2	2 2	1 2	1 1	1 1	1 2	1 2	1 2	1 2	1 2	1 2	1 1	1 2	1 1	1 1	1 1	1 1	1 2	1 2	1 2	1 2	2 2	1 1	1 1	1 2	1 1	1 2	1 2	1 2	2 2	1 2	1 1	1 2	1 2	1 1	1 2	1 2	1 2	1 2	1 2	1 1	1 2	2 2	1 1	0 0	1 2	1 1	1 2	1 2	1 1	1 1	1 1	1 2	1 2	1 1	1 1	1 1	1 1	2 2	1 1	1 1	1 1	1 2	1 1	1 1	1 1	1 1	1 2	1 1	1 1	1 1	1 2	1 1	1 2	2 2	1 2	1 2	0 0	1 1	1 1	1 2	1 1	1 1	1 1	1 2	1 2	1 2	1 1	1 2	1 2	1 2	1 2	1 1	1 2	1 2	1 2	1 1	1 2	1 2	1 1	2 2	1 2	2 2	1 1	1 2	2 2	1 2	2 2	1 1	1 2	1 2	1 2	2 2	1 2	1 2	1 1	1 1	1 2	1 1	1 2	1 2	1 2	1 1	1 2	1 1	1 2	1 1	1 2	1 2	1 2	2 2	1 1	1 1	1 2	1 1	1 2	1 2	1 1	1 2	1 1	1 1	1 2	1 1	1 1	1 1	2 2	1 1	0 0	1 2	2 2	2 2	1 2	1 1	1 2	2 2	1 2	1 2	1 1	1 2	2 2	1 2	1 2	1 2	1 1	1 1	1 2	2 2	1 2	1 2	1 2	1 2	1 2	1 1	1 2	1 1	1 2	0 0	2 2	1 2	2 2	1 2	1 1	1 2	1 2	1 1	2 2	1 2	2 2	1 1	1 1	1 2	2 2	1 2	1 2	1 1	2 2	1 1	1 1	1 2	1 2	1 2	1 2	1 1	1 2	1 2	1 2	1 1	1 2	1 2	1 1	1 2	1 1	1 2	1 1	1 2	2 2	1 2	1 1	1 1	1 2	1 1	1 1	1 2	1 2	1 1	1 1	1 2	1 2	1 2	1 2	2 2	1 1	1 2	1 2	1 1	1 1	1 2	1 2	1 1	1 2	1 2	1 2	1 2	1 1	1 1	1 2	1 2	1 1	1 2	1 2	2 2	1 2	1 2	1 2	1 1	1 1	1 2	2 2	1 2	2 2	1 2	1 1	1 2	1 2	2 2	1 1	1 1	1 1	1 1	1 1	1 2	1 2	1 1	1 1	1 1	1 2	1 2	1 1	0 0	1 1	1 1	2 2	1 1	1 2	1 1	1 1	1 1	1 2	1 2	1 1	1 1	1 2	1 1	1 2	1 1	1 2	1 2	2 2	1 1	1 2	1 2	1 2	1 2	1 2	1 1	1 2	1 1	1 2	1 1	1 2	1 2	1 1	1 1	1 2	1 1	1 2	1 1	1 1	1 1	1 2	1 2	2 2	1 1	1 1	1 2	1 2	1 2	1 2	1 2	1 2	1 2	1 2	1 2	0 0	1 2	0 0	1 2	1 2	1 1	1 1	1 2	1 1	1 1	1 1	1 2	2 2	1 2	1 2	1 2	1 2	1 2	1 1	2 2	1 2	1 1	1 1	1 1	1 1	1 2	1 1	1 2	1 2	1 2	1 2	1 1	0 0	1 1	1 1	1 1	1 2	1 1	1 2	1 2	1 2	1 1	1 1	1 1	1 1	1 1	2 2	1 2	1 1	1 2	1 1	1 2	1 2	2 2	1 2	1 2	1 1	1 2	1 2	1 1	1 2	1 2	1 2	1 2	1 2	1 2	1 2	1 1	1 2	1 2	1 2	1 1	1 1	1 2	1 2	1 2	1 1	1 1	1 1	1 2	0 0	1 2	1 1	1 2	1 1	1 1	1 2	1 2	1 1	1 2	1 1	1 2	1 1	1 2	1 2	1 1	1 1	1 2	1 2	1 1	1 1	1 1	1 2	1 2	1 2	2 2	2 2	1 1	1 1	0 0	1 2	1 2	1 1	1 1	1 1	1 2	1 1	1 2	1 2	1 1	1 1	2 2	1 2	1 1	1 1	1 2	1 1	1 1	1 2	1 2	1 2	2 2	1 2	2 2	2 2	1 1	1 1	1 1	1 2	1 2	1 1	1 1	1 1	1 1	1 1	1 1	1 2	1 2	1 1	2 2	1 1	2 2	1 2	1 2	1 1	1 2	2 2	1 1	1 1	1 1	1 1	1 1	1 1	2 2	1 1	1 1	1 2	1 1	1 2	1 2	1 2	1 1	1 1	2 2	1 2	1 1	1 1	1 1	1 1	1 2	1 1	1 2	1 1	1 1	1 2	1 1	1 2	2 2	2 2	1 1	1 1	1 1	1 1	1 2	1 2	1 1	1 2	1 2	1 2	1 1	1 1	1 2	1 1	1 1	1 1	1 2	1 1	1 1	1 2	2 2	2 2	1 2	1 2	1 2	1 2	1 1	1 1	1 2	1 2	1 1	1 2	0 0	1 1	1 2	2 2	2 2	1 2	1 2	1 1	1 2	1 2	2 2	1 2	1 1	1 1	1 2	1 1	2 2	1 1	1 1	1 2	1 2	1 2	1 1	2 2	1 1	1 2	1 1	1 1	0 0	1 1	1 1	1 2	1 1	1 2	1 2	0 0	1 2	1 1	1 1	1 2	1 1	1 1	1 1	1 1	1 2	1 2	1 2	1 2	1 2	1 2	1 2	1 1	1 1	1 2	1 1	1 2	1 1	1 2	1 2	1 1	1 1	1 1	1 2	1 1	1 1	1 2	1 2	1 1	1 2	1 2	1 1	1 1	0 0	1 2	1 2	1 2	1 1	1 2	2 2	1 2	1 2	1 2	1 2	2 2	1 2	1 2	1 2	1 2	1 1	1 2	1 2	1 2	1 2	1 1	1 1	1 1	1 2	1 2	1 2	1 2	2 2	1 1	1 1	1 1	1 2	1 2	1 1	1 2	1 1	1 1	1 1	1 1	1 1	1 1	1 2	1 1	1 2	1 2	1 2	1 1	1 2	1 1	1 1	1 2	1 2	1 1	1 1	1 1	1 2	1 2	1 1	1 2	1 2	1 1	2 2	1 1	1 2	2 2	1 2	2 2	1 2	1 2	1 1	1 2	1 2	1 2	1 1	1 2	1 2	2 2	1 1	1 2	1 1	1 1	1 1	1 2	1 2	1 1	1 2	1 1	1 2	1 1	0 0	1 2	1 2	1 1	1 2	2 2	1 1	1 1	1 2	1 2	1 2	1 2	1 1	1 2	1 1	1 2	1 1	1 1	1 2	1 1	1 2	2 2	1 1	1 2	1 1	2 2	1 2	1 2	2 2	1 2	1 2	1 1	2 2	1 2	1 1	1 2	1 2	1 2	1 1	1 2	2 2	1 1	1 1	1 1	2 2	1 2	1 2	1 2	2 2	1 1	1 2	1 2	1 1	1 1	1 1	1 2	1 1	1 2	1 1	1 2	1 2	1 1	1 1	1 2	1 1	2 2	1 1	1 1	1 2	1 2	1 2	1 1	1 1	1 1	1 2	1 2	1 1	1 1	1 2	2 2	1 1	2 2	1 1	2 2	1 1	1 2	1 2	2 2	2 2	1 1	1 2	1 1	1 2	1 2	1 1	0 0	1 2	1 1	1 1	1 1	1 2	1 1	1 1	1 1	1 2	1 2	1 1	1 1	2 2	1 2	1 2	1 1	1 2	1 1	1 2	1 1	1 2	1 2	1 2	1 1	1 1	1 1	1 2	1 1	1 2	1 2	1 1	1 1	2 2	1 1	1 2	1 1	1 2	1 2	1 1	1 1	1 2	1 2	1 2	1 1	1 2	2 2	1 1	1 2	1 2	1 1	1 1	1 1	1 2	1 1	1 1	1 1	1 1	2 2	2 2	1 1	2 2	1 1	1 1	1 2	1 1	1 1	1 1	1 1	1 1	1 1	1 2	1 1	1 1	1 1	1 1	1 2	1 1	2 2	1 2	1 2	1 2	1 2	1 2	1 2	1 2	1 2	1 2	1 1	1 2	1 1	1 1	1 1	1 2	1 1	2 2	2 2	1 1	1 1	1 1	1 2	1 2	1 2	1 1	1 1	0 0	1 1	1 1	1 2	1 1	2 2	1 2	1 2	1 2	1 2	1 2	2 2	2 2	1 1	1 2	2 2	1 1	1 1	1 2	1 1	1 1	1 1	1 1	1 1	1 1	1 2	1 2	1 1	1 2	1 2	1 1	1 1	1 1	1 1	1 2	1 1	1 2	1 2	1 2	1 1	1 2	1 1	1 2	1 1	1 2	1 2	1 1	1 1	1 2	1 2	1 2	1 2	1 1	1 2	1 2	1 2	1 2	1 2	1 2	1 2	2 2	1 1	1 1	1 1	1 1	1 2	1 1	1 1	1 1	1 1	1 1	1 1	2 2	1 1	1 2	1 1	1 2	1 1	1 2	1 1	1 1	1 1	1 2	1 2	1 2	2 2	1 1	1 2	1 1	2 2	1 1	1 1	1 1	1 2	1 1	1 2	1 2	1 2	1 1	1 2	1 1	1 1	1 2	1 2	1 2	1 1	1 2	1 1	1 1	1 1	1 1	1 2	1 1	0 0	2 2	1 2	1 1	1 1	0 0	1 1	1 2	1 2	1 2	1 2	1 2	1 1	1 1	1 2	1 1	1 2	1 2	0 0	1 1	1 1	1 2	1 2	1 2	1 1	1 1	1 1	1 2	1 1	1 2	1 1	1 1	1 2	1 2	1 2	1 1	1 1	1 2	1 2	1 2	1 2	1 1	1 2	1 2	2 2	1 1	1 2	1 1	1 1	1 2	1 2	2 2	1 2	1 1	1 1	1 2	1 2	1 2	1 1	1 1	1 1	1 2	1 2	1 2	1 1	1 2	1 1	1 1	1 2	1 2	1 1	1 1	1 1	1 2	1 2	2 2	1 2	1 2	1 1	1 2	1 2	1 1	1 1	1 2	1 2	1 2	2 2	1 2	1 1	1 2	1 1	1 1	1 2	1 2	2 2	1 1	1 1	1 2	2 2	1 2	1 2	1 1	1 1	1 2	1 1	2 2	1 1	1 2	2 2	1 1	1 1	2 2	2 2	1 2	2 2	1 1	1 1	1 1	1 1	1 1	1 2	1 2	1 1	1 1	1 2	1 1	2 2	1 2	1 2	0 0	1 1	1 1	1 2	1 2	1 2	2 2	1 2	1 1	2 2	1 1	2 2	1 2	2 2	1 1	1 2	1 1	1 2	1 2	1 1	1 2	1 1	1 2	1 1	2 2	1 2	1 2	1 2	1 2	1 2	1 1	1 2	1 1	1 1	1 1	1 2	1 1	1 1	1 2	2 2	1 2	1 1	0 0	1 2	1 2	1 1	1 1	1 2	1 2	1 2	1 2	1 2	2 2	2 2	1 2	1 2	1 1	1 1	1 1	1 2	1 2	1 2	1 2	2 2	1 2	1 1	1 1	1 2	1 2	1 2	1 2	1 1	1 2	1 2	1 1	1 1	2 2	1 2	1 1	1 2	1 1	1 1	1 2	1 1	1 1	1 1	1 2	1 1	1 2	1 1	0 0	1 1	1 1	1 1	1 2	1 1	1 1	1 2	1 2	1 2	1 1	1 2	1 2	1 1	1 1	1 2	1 2	1 2	1 1	2 2	1 2	1 2	1 2	1 2	2 2	1 1	2 2	1 2	2 2	1 1	1 2	1 1	1 1	1 2	1 1	1 2	2 2	1 2	1 1	1 1	1 2	1 2	1 1	1 1	1 2	1 2	1 1	1 1	1 2	1 1	1 2	1 1	1 1	1 1	2 2	1 2	2 2	1 1	1 1	1 2	1 1	1 1	1 1	1 2	1 1	1 2	1 2	1 1	1 1	1 1	1 1	1 1	1 2	1 2	1 2	2 2	1 2	1 1	1 1	1 2	1 2	1 2	1 2	1 2	1 2	1 2	1 2	1 2	1 2	1 1	0 0	1 1	1 1	1 2	1 2	1 2	1 1	1 1	1 2	1 2	1 1	1 2	1 1	1 1	1 1	1 2	1 1	1 1	1 1	1 2	1 1	1 1	1 2	1 2	1 1	1 1	1 2	2 2	1 2	1 1	1 1	1 1	1 1	1 2	1 2	1 1	1 2	1 1	1 2	2 2	1 1	1 1	1 1	1 2	2 2	1 2	1 2	2 2	1 2	1 2	1 2	1 2	1 2	1 2	1 2	1 2	1 1	2 2	1 1	1 1	1 1	1 1	1 2	1 1	1 1	1 1	1 1	1 2	2 2	1 2	1 2	2 2	1 1	1 2	1 2	1 2	1 2	1 1	1 2	2 2	2 2	1 2	1 2	1 2	1 2	1 2	1 1	1 1	1 1	1 1	1 1	1 1	1 2	1 1	2 2	1 2	1 2	1 1	2 2	1 2	1 2	1 1	2 2	1 2	1 1	1 2	1 2	1 2	1 1	1 1	1 1	1 2	1 1	2 2	1 1	1 1	2 2	1 1	1 2	1 1	1 2	1 2	1 2	1 2	1 1	1 2	1 2	1 2	1 2	1 1	1 2	1 2	1 2	1 2	1 2	1 2	0 0	1 1	1 2	1 2	0 0	1 1	1 1	1 1	1 1	1 1	1 2	1 1	1 1	1 2	1 1	1 2	1 1	1 1	1 2	1 1	1 2	2 2	2 2	2 2	1 1	1 1	0 0	1 1	1 2	1 1	1 2	1 2	1 2	1 2	1 2	1 1	2 2	1 2	1 1	1 2	2 2	1 2	1 1	1 2	1 2	0 0	1 1	1 1	1 1	1 1	1 1	1 1	1 2	1 1	1 2	1 2	1 1	1 1	1 2	1 2	0 0	1 2	1 2	1 1	1 1	1 1	1 1	2 2	1 1	1 1	1 2	1 2	1 2	1 1	1 1	1 2	1 1	1 2	1 2	1 2	1 2	1 1	0 0	1 2	2 2	2 2	2 2	1 2	1 2	1 2	2 2	1 2	1 1	1 2	1 2	1 1	1 2	1 2	1 2	1 1	1 2	1 1	1 1	1 2	1 2	2 2	1 2	1 1	1 2	1 2	1 2	1 2	1 2	1 2	1 1	1 2	1 2	1 1	1 2	1 2	2 2	1 2	1 2	1 2	1 1	2 2	1 1	1 1	1 1	1 2	1 1	1 2	1 2	1 1	1 1	1 2	2 2	1 1	1 1	1 2	1 1	1 2	1 1	1 1	1 1	1 2	1 1	1 1	1 2	1 1	1 2	2 2	1 1	1 2	1 2	1 1	1 2	1 1	1 2	1 2	1 1	1 2	0 0	1 2	1 2	1 1	2 2	1 1	1 2	1 2	1 2	1 1	1 2	1 2	1 1	1 1	1 2	1 2	2 2	0 0	1 1	2 2	1 2	1 1	1 2	1 1	1 1	1 2	1 2	1 2	1 1	1 1	1 2	1 1	2 2	1 1	1 1	1 1	1 2	1 2	1 1	1 1	1 2	1 2	1 1	1 1	1 1	1 1	1 2	1 2	1 2	1 1	1 2	1 1	1 1	1 2	1 2	1 1	1 2	1 2	2 2	1 1	1 2	1 2	1 1	1 1	1 1	1 1	1 2	2 2	1 2	1 2	1 2	1 1	1 1	2 2	1 2	1 2	1 2	1 2	0 0	1 1	1 2	0 0	1 1	1 2	1 2	2 2	1 2	1 2	1 1	1 2	2 2	1 2	1 1	1 1	1 2	1 1	0 0	1 2	1 1	1 2	1 1	1 1	1 2	0 0	1 1	1 1	1 2	2 2	2 2	1 1	1 1	1 2	1 2	1 1	1 1	1 2	1 2	1 2	1 1	2 2	1 2	1 1	1 2	1 1	2 2	1 1	1 2	2 2	1 2	1 2	1 1	1 2	2 2	1 1	0 0	1 2	1 1	1 2	1 1	1 2	0 0	1 1	1 1	1 2	1 1	1 1	1 2	1 2	1 2	1 1	2 2	1 2	1 1	1 2	1 1	1 1	1 1	1 2	1 1	0 0	1 2	1 2	1 1	1 2	1 2	1 1	1 1	1 2	1 1	1 2	1 1	1 1	1 2	2 2	1 1	1 2	2 2	1 1	1 2	1 2	1 1	1 2	2 2	2 2	1 2	1 2	1 2	1 1	1 2	1 2	1 1	1 1	1 1	1 2	1 2	1 1	1 1	1 2	1 2	1 1	1 2	1 2	2 2	1 2	1 2	1 2	1 1	1 2	1 1	1 1	1 2	1 2	1 1	1 1	1 1	1 1	1 1	1 2	1 1	1 2	1 1	1 2	2 2	1 1	1 1	1 1	2 2	2 2	0 0	1 1	2 2	1 1	1 1	1 1	1 2	1 2	1 1	1 1	1 1	1 1	1 2	1 2	1 1	1 1	1 2	1 2	1 2	1 1	2 2	0 0	1 1	1 1	1 1	1 1	1 1	1 1	2 2	1 1	1 2	1 1	1 2	2 2	1 2	1 1	1 2	1 2	1 1	1 1	1 2	1 1	1 2	1 2	1 1	1 2	1 1	2 2	1 2	1 2	1 2	1 1	1 1	1 2	1 2	1 2	1 1	1 1	1 1	1 1	0 0	1 1	1 1	1 2	1 1	1 1	1 2	1 1	1 2	1 1	1 2	1 1	1 1	1 1	1 2	0 0	2 2	1 2	1 2	2 2	1 1	1 1	1 2	1 1	1 2	1 1	1 2	1 1	1 1	1 1	0 0	1 2	2 2	1 1	1 2	1 1	1 1	1 1	1 1	1 2	2 2	1 1	1 2	1 1	1 1	1 2	1 2	1 2	1 1	1 2	1 1	1 2	2 2	1 2	1 2	1 2	1 2	1 1	1 1	1 2	1 2	1 2	1 1	1 1	2 2	1 2	1 2	1 1	1 2	1 2	1 1	1 1	1 2	1 2	1 1	1 2	1 1	1 2	2 2	1 2	1 1	1 1	0 0	1 2	1 1	1 2	1 1	1 1	0 0	1 1	1 1	1 2	1 2	1 1	1 2	1 1	1 2	1 2	1 1	1 1	2 2	1 2	1 1	1 1	1 1	1 2	1 1	1 2	1 1	1 2	1 1	1 1	1 1	1 2	1 1	1 2	1 2	1 1	1 1	1 1	0 0	1 2	1 1	1 2	1 1	1 2	1 1	1 1	1 1	1 2	1 1	1 2	2 2	1 2	1 1	1 1	1 2	1 2	1 1	1 2	1 1	0 0	1 1	1 2	1 2	1 1	1 1	1 2	1 1	1 2	1 1	1 2	2 2	1 2	2 2	1 2	1 2	1 2	1 2	1 1	1 2	1 1	1 1	1 2	0 0	1 2	1 2	1 1	2 2	0 0	1 1	2 2	1 2	1 2	1 1	1 1	1 1	1 1	1 1	1 2	1 1	1 2	1 1	1 1	2 2	1 2	1 1	1 1	1 1	1 2	1 2	1 1	1 2	1 1	1 1	1 1	1 1	1 1	1 2	1 1	1 1	1 1	1 1	1 2	1 1	1 1	1 2	1 2	1 2	1 1	1 1	1 1	2 2	1 2	1 1	1 1	1 2	1 1	1 1	1 1	0 0	1 2	1 1	1 1	1 1	1 1	1 1	1 2	1 1	1 2	1 2	1 2	1 2	1 1	1 2	1 2	2 2	1 1	1 2	1 2	1 1	0 0	1 1	1 2	2 2	2 2	1 2	1 1	1 1	1 1	1 1	1 1	1 2	1 2	1 1	1 2	1 1	1 1	1 1	1 1	1 2	1 2	1 2	1 2	1 2	1 2	1 2	1 1	1 2	2 2	1 1	1 2	1 2	1 1	1 1	1 2	1 2	1 1	1 1	1 2	1 1	1 2	1 1	1 2	1 1	1 2	1 2	1 1	1 2	1 2	1 2	1 2	1 1	1 2	2 2	1 2	2 2	1 2	1 1	1 1	1 2	1 1	1 1	1 2	1 1	1 1	1 2	1 1	1 2	1 2	1 1	1 1	1 2	1 2	1 2	1 1	1 1	1 2	1 2	1 2	0 0	1 1	1 2	1 1	1 2	2 2	1 2	1 2	1 1	1 2	2 2	1 1	1 1	1 1	1 2	2 2	1 1	1 2	1 1	1 1	1 1	1 2	1 1	1 2	1 2	1 1	1 2	1 2	1 1	1 2	1 2	1 2	1 1	1 1	1 2	1 1	1 1	1 1	1 1	1 2	1 2	1 1	1 2	1 2	1 2	1 1	1 1	1 1	1 1	1 1	2 2	1 1	1 1	1 1	1 1	1 1	1 2	1 1	0 0	1 1	1 1	1 2	1 1	1 1	0 0	1 1	1 2	1 2	1 1	1 1	1 1	1 2	1 2	1 2	1 1	1 2	1 2	1 2	1 2	1 1	1 2	1 2	1 1	1 1	1 2	1 1	1 1	1 2	1 2	1 2	1 2	1 2	1 1	1 2	2 2	1 2	1 1	2 2	1 1	1 1	1 1	1 2	1 1	1 2	1 2	1 2	1 2	1 2	1 1	1 1	1 1	1 2	1 1	1 2	1 1	1 1	1 1	1 1	1 1	1 1	0 0	1 1	1 1	1 1	1 2	1 2	1 2	1 2	1 2	1 2	1 1	1 2	1 2	1 1	0 0	2 2	1 2	1 2	1 2	1 1	1 1	1 1	1 1	1 2	2 2	1 2	1 1	0 0	1 1	1 2	1 2	1 1	1 1	1 2	1 2	1 2	1 2	2 2	2 2	1 1	1 2	1 2	1 2	1 1	1 2	1 2	1 1	1 1	1 2	1 1	1 2	2 2	1 1	1 2	1 1	1 2	1 2	1 2	1 2	2 2	1 2	1 2	0 0	1 1	2 2	2 2	1 2	1 1	1 1	1 2	1 2	1 1	1 1	2 2	1 2	1 1	1 2	1 2	1 1	1 1	1 2	1 1	1 2	1 1	1 1	1 2	1 1	1 1	1 2	1 1	1 1	1 1	1 2	1 1	1 1	1 2	1 2	1 2	1 2	1 2	1 1	1 2	1 2	1 1	1 2	1 2	1 1	2 2	1 2	1 1	1 2	2 2	1 1	1 2	2 2	1 1	1 1	1 2	1 1	1 1	1 1	1 1	1 2	1 1	1 2	1 1	1 2	1 1	1 1	1 1	1 1	1 2	1 1	1 2	1 2	1 2	1 1	1 2	1 2	1 1	1 2	1 1	1 1	1 2	1 2	1 1	1 2	1 1	1 1	1 1	1 2	1 2	1 2	1 2	0 0	1 2	1 2	1 2	1 1	1 2	1 1	1 2	1 1	1 2	1 2	1 2	2 2	1 2	1 1	2 2	1 1	1 1	1 1	1 2	1 2	1 1	1 2	2 2	1 1	1 1	1 2	1 2	1 1	1 1	1 2	0 0	1 1	1 1	1 2	1 1	1 2	1 2	1 1	1 2	1 1	1 1	2 2	1 1	1 1	1 1	1 1	1 2	1 2	1 2	1 2	1 1	1 1	1 1	1 1	1 2	1 2	1 2	1 2	2 2	1 2	2 2	1 2	2 2	1 2	1 1	1 2	1 2	1 2	1 2	1 2	1 2	1 1	1 2	1 1	1 2	1 2	1 1	1 1	1 2	1 2	1 2	2 2	0 0	1 1	1 1	1 2	2 2	1 1	1 2	1 2	2 2	1 2	2 2	0 0	1 1	1 2	1 1	1 1	1 1	1 2	1 2	1 1	1 2	0 0	1 2	1 2	1 2	1 2	1 1	1 2	1 1	1 2	1 1	1 1	1 2	1 2	1 1	1 2	1 1	1 2	1 1	1 1	1 1	2 2	1 2	1 1	1 1	1 2	2 2	1 1	2 2	1 1	1 2	1 1	1 1	1 2	1 2	1 1	1 1	1 2	1 1	2 2	1 2	2 2	1 1	1 1	1 1	1 1	1 1	1 1	1 2	1 1	1 2	1 2	1 1	1 1	1 1	1 2	1 1	1 1	1 1	1 1	2 2	1 2	1 1	1 1	1 1	1 2	1 2	1 2	1 2	1 2	1 2	1 1	2 2	1 1	1 1	1 1	1 1	1 2	1 1	1 1	1 1	1 2	1 2	1 1	1 1	1 1	1 2	1 1	1 1	1 2	1 1	1 1	1 1	1 1	1 2	2 2	1 2	1 1	1 1	1 1	1 1	1 1	1 1	1 2	1 2	2 2	1 2	1 2	1 1	2 2	1 2	1 1	1 2	1 2	1 2	0 0	1 1	1 2	1 1	1 2	1 1	2 2	1 1	1 2	1 2	1 2	1 2	1 1	1 2	2 2	1 1	1 2	2 2	1 1	1 1	1 2	1 2	1 2	1 1	1 1	1 2	1 1	1 2	1 2	1 2	1 1	1 1	1 1	1 1	1 2	1 2	1 1	1 2	2 2	1 1	1 1	1 2	1 1	1 1	1 2	1 2	1 1	1 2	1 1	1 1	1 2	1 2	1 1	1 1	1 1	2 2	1 2	1 1	1 1	1 2	1 2	1 1	1 2	1 2	1 2	1 2	1 2	1 2	1 1	1 2	1 1	1 2	1 2	1 1	1 1	1 2	1 2	1 1	1 2	1 2	1 2	1 2	1 2	1 2	1 2	1 2	1 1	1 2	1 1	1 2	1 1	1 2	2 2	1 1	1 1	1 2	0 0	1 2	1 2	1 1	1 1	2 2	1 2	1 1	1 2	2 2	1 2	1 1	1 2	0 0	1 1	1 2	1 1	1 2	1 2	1 1	1 1	1 2	0 0	1 1	1 1	1 1	1 2	1 1	1 1	1 1	1 2	1 2	1 2	1 2	1 1	1 2	1 2	1 1	1 2	1 1	1 2	1 2	1 1	1 2	1 1	1 2	1 1	1 2	1 2	1 2	1 2	1 2	1 2	1 2	1 1	1 2	1 2	1 1	1 2	1 1	1 1	1 1	1 1	1 1	1 1	1 2	1 1	1 2	1 1	1 1	1 1	1 2	1 1	1 1	1 2	1 2	1 1	1 1	1 1	1 1	1 1	1 1	1 1	1 2	1 1	1 2	1 1	1 2	0 0	1 1	1 2	1 2	1 1	1 1	1 2	1 2	2 2	1 2	1 2	1 1	1 2	1 1	1 2	1 1	1 1	1 1	1 1	1 2	1 2	1 1	1 1	1 2	1 2	1 2	1 1	1 1	1 1	2 2	1 1	1 2	1 2	1 1	1 2	2 2	2 2	1 2	1 2	1 1	1 2	1 2	1 2	1 2	1 2	1 2	1 2	1 1	1 2	1 2	1 2	1 2	1 2	1 1	1 2	2 2	1 1	1 2	1 1	1 1	1 2	1 2	1 2	1 1	1 2	1 2	1 2	1 2	1 2	1 1	1 2	1 2	2 2	1 1	1 2	1 1	1 2	1 1	1 1	0 0	1 1	1 1	1 2	1 2	0 0	1 2	1 1	1 2	1 2	1 1	1 1	1 2	2 2	2 2	1 2	2 2	1 1	1 2	1 2	1 2	1 2	1 1	1 2	1 1	1 2	2 2	1 1	1 1	1 2	1 2	1 2	1 2	1 2	2 2	1 2	1 2	1 2	1 2	1 1	1 1	1 2	1 2	1 2	1 2	1 2	1 1	1 2	1 1	1 2	1 1	1 2	1 2	1 2	1 1	1 2	1 2	1 1	1 1	1 1	1 2	1 2	2 2	1 2	0 0	1 2	1 2	1 2	1 2	1 1	1 2	1 2	1 2	1 1	1 1	2 2	1 1	1 2	2 2	1 1	1 1	1 2	1 1	1 2	1 1	1 1	1 1	1 1	1 1	1 2	1 2	2 2	1 1	1 2	2 2	1 1	1 2	1 1	0 0	1 2	2 2	1 2	1 2	1 1	2 2	2 2	1 2	1 2	1 2	1 1	1 2	1 2	1 2	1 1	1 1	1 2	1 1	1 2	2 2	1 1	1 2	1 2	1 1	1 1	1 1	2 2	1 1	1 1	2 2	1 1	1 1	1 1	1 2	1 2	1 1	0 0	1 1	1 2	2 2	1 1	1 1	1 1	1 1	1 2	0 0	1 1	1 2	1 2	1 1	1 2	1 2	1 1	1 1	1 2	1 1	1 2	1 2	1 2	1 1	1 1	0 0	1 2	1 1	1 1	1 1	1 2	1 1	1 1	1 2	1 2	1 2	1 1	1 2	1 2	1 2	2 2	1 2	1 2	1 2	1 2	1 1	1 1	1 2	1 1	1 1	0 0	1 2	1 1	1 2	1 2	1 1	2 2	1 2	1 2	0 0	0 0	1 1	1 1	1 1	1 1	1 2	1 1	1 1	1 1	1 2	1 1	1 2	0 0	1 2	1 1	1 2	1 1	2 2	1 1	1 1	1 2	1 1	1 2	1 2	1 2	1 1	1 2	1 1	0 0	1 2	1 2	1 1	1 2	1 2	1 2	1 1	1 2	1 2	2 2	1 1	1 1	1 1	1 1	1 2	1 1	1 1	1 1	1 1	1 1	1 2	1 2	1 2	1 1	1 1	1 2	1 1	0 0	2 2	1 1	1 2	1 2	2 2	1 2	1 1	1 2	0 0	1 2	1 2	1 2	1 1	1 1	1 2	1 1	1 2	1 2	1 2	1 1	1 1	2 2	1 2	1 1	1 1	1 1	2 2	1 1	1 1	0 0	1 1	1 2	0 0	2 2	1 2	1 2	2 2	1 1	1 2	1 1	1 1	1 2	0 0	1 1	0 0	1 1	1 2	1 1	1 2	1 2	1 1	1 1	1 1	0 0	1 2	1 1	1 2	1 2	1 1	1 1	1 2	1 2	1 1	1 2	1 2	1 1	1 1	1 2	1 2	1 1	1 1	1 2	1 2	1 1	1 1	1 1	1 1	1 1	1 2	1 2	1 2	1 2	1 2	1 1	1 2	1 2	1 2	1 2	1 1	1 1	0 0	1 2	1 1	1 1	2 2	1 2	1 1	1 1	1 1	0 0	1 2	1 1	2 2	1 1	1 1	1 2	1 2	1 2	1 1	1 1	1 1	1 2	1 2	1 2	1 2	1 1	1 2	1 2	1 1	1 2	1 2	1 1	1 1	1 1	1 1	1 2	1 2	1 2	0 0	1 2	1 1	1 2	1 1	1 2	1 1	1 2	1 1	1 2	1 2	1 2	1 2	1 1	1 2	1 1	2 2	1 1	2 2	1 2	1 1	1 1	1 1	1 2	1 2	2 2	1 2	1 1	1 1	1 1	1 2	1 2	1 1	2 2	2 2	2 2	1 2	1 2	1 2	1 1	2 2	1 1	1 2	1 1	1 2	2 2	1 2	1 2	1 1	1 1	1 1	1 1	1 1	1 1	1 2	1 2	1 2	1 1	1 1	1 2	1 1	1 2	1 2	1 2	1 1	1 1	1 1	1 1	1 1	1 2	1 2	2 2	1 1	1 2	1 1	1 1	1 2	1 1	1 1	1 1	1 2	1 1	1 1	1 2	1 1	1 2	1 2	1 1	1 1	1 2	1 2	1 1	1 2	2 2	1 2	1 1	0 0	1 2	1 2	1 1	1 2	1 2	1 1	1 2	1 2	1 2	2 2	1 2	1 1	1 2	1 1	2 2	1 1	1 1	1 1	1 2	1 2	1 1	1 1	1 1	1 2	1 2	1 2	1 2	1 2	1 1	1 2	1 1	1 2	1 2	1 2	1 2	1 1	1 1	1 1	1 1	1 1	1 2	1 2	2 2	2 2	1 1	1 2	1 2	1 1	1 2	1 2	1 2	1 2	1 2	1 2	2 2	0 0	1 1	0 0	1 1	2 2	1 1	1 1	1 2	1 1	1 1	1 1	1 1	1 2	2 2	1 2	1 2	1 2	2 2	0 0	1 1	1 2	1 2	1 1	1 1	1 2	1 1	1 1	1 2	1 1	1 1	1 2	1 1	1 2	1 2	0 0	1 2	1 1	0 0	1 1	1 2	1 1	1 2	1 1	1 2	1 2	1 1	1 1	1 1	1 2	1 2	2 2	1 1	1 1	1 1	1 1	1 2	1 2	1 1	1 1	1 1	1 1	1 1	1 2	2 2	1 1	1 1	1 1	1 1	2 2	0 0	1 2	1 1	1 2	1 1	1 1	1 1	1 1	1 2	1 2	1 1	1 1	1 1	1 1	1 1	1 2	1 1	1 2	2 2	1 2	1 1	1 2	1 1	1 2	1 1	1 2	1 2	1 1	1 2	1 2	1 1	1 2	1 2	1 2	1 1	1 1	1 2	1 2	1 2	1 1	1 1	2 2	2 2	1 1	1 2	1 2	2 2	1 2	1 1	1 1	1 1	1 2	1 1	1 1	1 2	1 1	1 2	1 1	1 1	1 1	1 2	1 1	1 2	1 2	1 1	1 1	1 1	1 2	1 2	1 1	1 1	1 1	1 1	1 2	1 1	1 2	1 1	1 2	1 2	2 2	1 1	1 1	1 1	1 2	1 1	1 2	1 1	2 2	1 2	1 1	1 2	1 2	1 1	1 1	1 1	1 2	1 1	1 2	1 1	1 1	1 1	1 2	1 1	1 2	1 2	1 1	1 1	2 2	1 1	1 2	1 1	1 2	1 1	1 1	0 0	1 1	1 1	1 2	2 2	2 2	1 2	1 2	1 1	1 2	1 1	1 1	1 2	1 2	1 1	0 0	1 1	1 2	1 2	1 2	2 2	1 2	1 2	1 1	1 1	1 1	1 1	1 2	1 1	1 2	1 1	0 0	1 1	2 2	2 2	1 1	1 2	1 2	1 1	1 2	1 1	1 1	1 2	1 2	0 0	1 1	1 2	1 2	0 0	1 2	1 2	1 2	1 2	1 2	1 2	1 2	1 1	1 2	1 1	1 2	1 2	2 2	1 1	1 2	1 2	1 2	1 1	1 1	1 1	1 2	2 2	1 2	1 2	1 1	2 2	1 1	1 2	1 2	1 2	1 2	1 2	1 2	1 1	1 2	2 2	1 1	2 2	1 2	1 2	1 2	1 1	2 2	1 1	1 2	1 1	1 2	1 2	1 2	1 1	1 1	1 1	1 1	1 2	1 2	1 2	1 2	1 2	1 1	1 1	1 2	1 1	1 2	1 2	1 2	1 2	1 1	1 2	1 1	1 1	1 2	1 1	1 1	1 2	1 1	1 1	1 2	1 2	1 1	1 2	1 2	1 2	2 2	0 0	1 2	1 1	1 1	1 2	1 1	1 1	0 0	1 1	1 1	1 1	1 2	1 1	1 2	1 1	1 1	1 1	1 2	1 2	1 2	1 1	1 1	2 2	1 2	1 2	1 2	1 2	1 2	1 2	1 2	1 1	1 2	1 2	1 1	1 1	1 2	2 2	1 2	1 1	1 2	1 1	1 2	1 2	1 1	1 2	1 2	2 2	1 1	1 2	1 2	1 2	1 2	1 2	1 2	1 1	1 2	1 2	1 2	2 2	1 1	1 1	1 2	1 2	1 1	1 2	1 2	1 2	1 2	1 1	1 2	1 2	1 2	1 1	1 1	1 1	0 0	1 2	2 2	1 2	1 2	1 1	1 1	1 2	1 2	1 2	1 1	2 2	1 2	1 2	2 2	2 2	1 2	1 1	1 1	1 1	1 2	1 2	1 2	1 2	1 2	1 1	2 2	1 1	0 0	1 2	2 2	1 2	1 1	1 2	1 2	1 1	1 1	1 2	1 2	1 2	1 2	1 2	1 1	1 1	1 1	1 1	1 2	1 1	1 1	1 1	1 2	2 2	1 1	1 2	1 1	1 2	1 1	1 1	1 2	1 2	1 1	1 1	1 1	1 2	1 2	1 1	1 1	1 2	1 2	2 2	1 1	1 1	1 2	1 2	2 2	1 1	1 1	2 2	1 1	1 2	1 2	1 1	1 2	1 2	1 2	2 2	0 0	1 1	1 2	1 2	1 1	1 1	1 2	1 1	1 1	1 2	1 2	1 2	1 2	1 1	1 1	1 1	1 2	1 2	1 2	1 1	1 2	1 1	1 1	1 1	1 2	1 1	1 2	1 1	1 2	1 1	1 1	1 2	1 2	1 1	1 2	1 1	2 2	1 2	1 1	1 2	1 2	0 0	1 2	2 2	1 1	2 2	1 2	1 2	1 2	1 2	1 2	1 2	1 2	2 2	1 2	1 2	1 1	1 1	1 1	1 2	1 2	1 1	1 2	1 2	1 2	1 2	1 1	1 2	1 1	1 2	1 1	1 2	1 1	1 2	1 1	1 2	1 2	1 1	1 2	1 2	1 1	1 1	1 2	1 1	1 1	1 2	1 2	1 2	1 1	1 1	1 2	1 2	0 0	1 1	1 1	1 1	1 1	1 1	1 1	1 1	1 1	1 1	2 2	1 1	1 1	1 2	1 1	1 1	1 1	1 1	1 2	1 2	1 1	1 2	1 1	1 1	1 2	1 1	0 0	1 1	1 2	2 2	1 1	1 1	1 1	0 0	1 2	1 1	1 2	1 2	2 2	1 2	1 1	1 2	1 1	1 2	1 2	1 1	1 1	1 1	1 2	1 1	1 2	1 2	1 1	1 2	2 2	1 1	2 2	1 1	1 2	1 1	1 2	1 2	1 2	1 1	1 1	1 2	1 2	1 2	1 2	1 2	1 1	1 2	1 1	1 1	1 2	1 2	1 1	1 1	1 2	1 1	1 2	1 1	1 1	1 1	1 2	1 1	1 1	1 2	1 2	1 1	1 1	1 2	1 2	1 2	1 1	1 1	2 2	1 1	1 1	1 2	1 1	1 1	1 2	1 1	1 2	1 1	1 2	1 1	1 2	1 2	1 1	1 1	1 2	1 2	1 2	1 2	2 2	1 1	1 1	0 0	2 2	1 1	1 2	1 1	1 1	1 2	1 1	1 2	1 2	1 2	0 0	1 2	1 2	1 1	2 2	1 2	1 1	1 2	1 2	1 2	1 1	2 2	2 2	1 1	1 2	1 2	2 2	1 1	1 2	1 2	1 1	2 2	1 2	1 2	2 2	1 2	1 2	1 2	1 2	1 2	1 1	1 1	1 1	1 1	1 2	2 2	2 2	2 2	1 1	1 1	2 2	1 1	1 1	1 1	1 1	1 1	1 2	1 1	1 1	1 1	1 2	1 1	1 2	1 1	1 2	1 2	1 1	1 1	1 1	1 1	1 2	1 1	1 1	2 2	1 2	1 2	1 2	1 1	2 2	1 2	1 2	1 2	1 1	1 2	1 2	1 1	1 2	1 1	1 2	1 2	2 2	1 1	1 2	1 2	2 2	1 2	1 2	1 1	1 2	1 1	1 1	1 2	1 1	1 1	2 2	1 2	1 2	1 1	1 1	1 2	1 1	1 1	1 2	2 2	2 2	1 1	1 2	1 1	1 1	1 2	1 2	1 2	1 1	1 2	1 1	1 1	1 2	1 2	1 2	1 1	1 2	1 1	1 2	1 2	1 2	2 2	1 2	1 1	1 2	1 1	1 1	1 1	1 1	1 2	1 1	1 1	2 2	1 1	1 2	1 2	1 1	2 2	1 1	1 2	1 1	1 2	1 1	1 2	1 2	1 2	1 2	2 2	1 1	1 2	2 2	1 1	1 1	1 2	1 1	1 1	1 1	1 2	1 2	1 2	1 1	2 2	1 2	1 2	1 2	2 2	1 2	1 1	1 1	1 1	1 1	1 1	1 2	1 1	1 1	1 1	1 2	1 2	1 2	1 2	1 1	1 1	1 1	1 1	1 1	1 2	1 1	1 2	1 2	1 2	1 2	1 2	2 2	2 2	1 1	2 2	1 1	1 1	1 2	1 2	1 2	1 2	1 2	1 2	1 2	1 2	1 1	1 2	1 2	1 1	1 2	1 1	1 1	1 1	1 1	1 2	1 2	2 2	1 1	1 1	1 1	1 1	1 2	1 2	0 0	1 1	2 2	1 2	1 1	1 1	0 0	1 2	1 2	2 2	1 1	1 1	2 2	1 1	1 1	1 1	1 2	1 1	1 1	1 2	1 1	2 2	2 2	1 2	1 1	1 2	1 1	1 2	1 2	1 1	1 2	1 1	1 2	1 1	1 2	0 0	1 1	1 1	1 1	1 1	1 2	1 2	1 2	2 2	1 1	1 2	1 2	1 2	1 1	1 2	1 2	1 1	1 1	1 1	1 2	1 1	1 2	1 2	1 1	1 2	1 2	1 2	1 2	1 1	1 1	1 1	1 1	1 2	1 1	1 2	1 1	1 2	1 2	1 1	1 2	1 2	1 2	1 2	1 2	1 2	1 2	1 1	1 1	2 2	1 1	1 1	1 2	1 1	1 1	1 1	1 1	2 2	0 0	1 1	1 2	1 2	1 2	1 1	1 2	1 1	1 1	1 2	1 2	1 2	1 2	1 1	1 1	1 2	1 1	1 2	1 1	1 2	1 2	2 2	1 1	2 2	1 2	1 2	1 2	1 1	1 1	1 1	1 2	1 1	1 2	1 2	1 2	1 1	1 1	1 1	1 2	1 2	1 1	1 1	1 1	1 1	1 2	1 2	1 2	1 2	1 1	1 2	1 2	1 1	1 1	1 2	1 1	1 2	1 2	1 2	1 1	1 1	1 1	1 1	1 2	1 2	2 2	1 2	1 2	1 2	1 2	1 1	2 2	1 1	1 2	1 2	1 1	1 1	1 2	1 2	1 1	2 2	1 1	1 2	1 2	1 1	2 2	1 2	1 2	1 1	1 1	1 2	1 2	1 1	1 2	1 2	2 2	1 1	1 2	1 1	1 1	1 2	1 2	1 1	1 1	1 1	1 1	1 2	1 1	1 2	1 1	1 2	1 2	1 1	1 1	1 1	1 2	1 2	1 2	2 2	1 1	1 2	1 1	1 1	1 2	1 1	1 2	1 1	1 2	1 2	1 1	1 1	1 2	2 2	1 1	1 2	1 1	1 1	1 2	1 2	1 2	2 2	2 2	1 1	1 2	1 1	1 2	1 1	1 1	2 2	1 2	1 1	1 2	2 2	1 1	1 1	1 2	1 2	1 2	1 1	1 2	1 1	1 2	1 1	1 1	1 1	1 2	1 1	1 1	1 2	1 2	1 1	1 2	1 2	2 2	1 1	2 2	2 2	1 1	1 1	1 1	1 2	1 1	1 2	1 2	1 1	2 2	1 1	0 0	1 1	1 2	1 1	1 1	2 2	1 1	1 2	1 2	1 2	1 2	1 1	1 2	1 2	1 2	1 2	1 2	1 1	1 1	1 2	1 2	1 2	2 2	1 2	2 2	1 2	1 1	1 2	1 1	1 2	1 1	1 1	1 1	1 1	1 1	1 1	1 1	1 1	1 1	1 1	1 2	0 0	1 1	1 1	1 1	1 1	1 1	1 1	1 1	1 2	1 2	1 2	1 2	1 2	1 2	1 1	1 1	1 2	1 1	1 1	1 2	1 1	1 2	1 1	2 2	1 1	1 1	1 1	1 1	1 2	1 2	1 2	1 2	1 1	2 2	1 1	1 2	1 2	1 2	1 2	1 1	1 2	1 1	0 0	1 1	1 1	2 2	1 2	1 1	1 1	1 1	1 2	1 1	1 2	1 2	1 1	1 2	1 2	2 2	2 2	1 2	1 2	1 1	1 1	1 1	1 2	2 2	1 2	1 2	1 2	1 2	1 1	1 2	1 2	1 1	1 2	1 1	1 2	1 1	1 2	1 2	1 2	1 1	1 2	1 1	1 2	1 1	2 2	1 1	1 1	1 2	1 1	1 2	1 1	1 2	1 2	1 2	1 1	1 1	1 2	1 2	1 2	2 2	1 1	1 2	1 2	1 1	1 2	1 2	1 2	1 2	1 1	1 2	1 1	1 2	1 2	1 1	1 1	1 1	1 1	1 1	1 2	1 1	1 2	1 2	1 1	1 1	1 2	1 1	1 2	1 1	1 1	2 2	1 1	1 1	1 1	1 2	1 1	1 1	2 2	1 1	1 2	1 1	1 1	2 2	1 2	1 2	1 2	1 2	1 1	1 1	1 2	1 2	1 2	1 1	1 2	1 2	1 1	1 2	1 2	1 2	2 2	1 2	1 2	1 1	1 1	1 2	2 2	1 1	2 2	1 2	1 1	1 2	2 2	2 2	1 2	1 2	1 1	1 1	1 1	1 1	1 2	1 1	1 1	1 2	1 2	1 2	1 1	1 2	1 1	1 1	1 2	1 2	1 2	1 1	1 2	1 2	1 2	1 1	1 2	1 2	1 2	1 2	1 2	1 1	1 2	1 1	1 2	1 1	1 2	1 1	1 2	1 2	2 2	1 2	1 2	1 2	1 2	1 2	2 2	1 1	1 1	1 2	1 1	0 0	1 1	1 2	1 2	1 1	1 2	1 2	2 2	1 2	2 2	1 2	1 2	1 2	1 2	1 1	1 1	1 1	1 2	1 1	1 1	1 1	1 2	1 1	1 2	0 0	1 2	1 1	1 1	1 2	2 2	1 2	1 1	1 1	1 2	1 2	1 1	1 2	1 1	1 1	1 2	1 1	2 2	1 1	1 2	1 1	1 2	1 2	1 2	1 1	1 1	1 1	1 2	1 1	1 2	1 2	1 2	1 1	1 2	1 2	1 2	1 1	1 2	1 2	1 2	0 0	2 2	1 1	1 2	1 1	1 2	1 2	1 2	1 2	1 2	1 2	2 2	1 2	1 2	1 1	1 2	1 2	1 2	1 1	1 2	1 2	1 2	1 1	1 1	1 1	1 2	1 2	1 1	1 2	1 2	1 2	1 1	1 1	1 1	1 1	1 2	1 2	1 2	1 1	0 0	1 2	1 1	1 2	1 2	1 1	1 2	1 2	1 2	1 2	1 1	1 2	1 2	1 2	1 2	2 2	1 1	1 2	1 2	1 2	2 2	1 2	1 1	1 2	1 1	1 1	1 1	1 2	2 2	1 2	1 1	1 1	1 1	1 1	1 2	1 2	1 1	1 1	1 2	1 2	1 2	1 1	1 1	1 1	1 2	1 1	1 1	1 1	1 1	1 2	1 2	1 2	1 2	1 1	1 1	1 2	1 1	1 2	1 2	1 2	1 1	1 2	2 2	1 2	0 0	1 1	1 1	1 1	2 2	2 2	1 2	1 2	1 2	1 1	1 2	1 1	1 2	1 1	1 1	1 2	1 1	2 2	1 2	1 2	1 2	1 1	1 2	1 2	1 2	1 1	1 2	1 2	2 2	1 2	1 1	1 2	1 2	1 1	1 2	1 1	2 2	1 1	1 1	1 2	1 2	0 0	1 2	1 2	1 2	1 1	1 2	1 2	1 1	1 2	1 2	1 2	1 1	1 1	1 2	1 2	1 1	1 1	1 1	1 1	1 2	1 1	1 1	1 1	1 2	1 1	1 2	1 2	0 0	1 1	1 1	1 1	1 2	1 1	1 1	1 1	1 1	2 2	1 1	1 2	1 2	0 0	1 2	1 1	1 1	1 1	1 1	1 2	2 2	1 1	1 1	1 1	1 1	1 1	1 2	1 2	1 2	1 1	1 2	1 2	1 1	1 2	1 2	1 1	1 2	1 2	1 1	1 2	1 1	1 2	1 2	1 2	2 2	1 1	1 2	1 2	1 2	1 1	0 0	1 2	1 2	1 2	1 1	1 2	1 2	1 2	1 2	1 1	1 2	1 2	1 1	1 1	1 2	1 2	1 2	2 2	1 2	1 2	1 1	1 2	1 2	1 2	1 1	1 2	1 2	1 2	1 2	0 0	1 2	1 1	2 2	1 1	2 2	1 2	1 2	1 2	1 1	2 2	1 1	1 1	1 1	1 2	1 1	1 2	1 2	1 2	1 2	2 2	1 1	1 1	1 2	1 2	1 2	1 1	2 2	1 1	2 2	2 2	2 2	1 2	1 1	1 2	1 2	1 1	0 0	1 1	1 2	1 2	1 2	1 1	0 0	1 1	1 1	1 2	0 0	1 1	1 2	1 2	1 2	1 1	1 1	1 2	1 1	1 2	1 2	1 1	1 1	1 1	1 1	1 2	1 2	1 2	1 2	1 1	1 2	1 1	1 1	1 1	1 1	1 1	1 1	1 1	1 1	1 2	1 2	1 2	1 2	1 1	1 1	1 1	1 1	1 2	1 1	1 2	1 1	1 2	2 2	1 2	1 2	1 2	1 2	1 1	1 1	1 2	2 2	1 1	1 1	1 2	1 1	1 1	1 2	1 1	1 2	1 2	1 2	1 2	2 2	1 2	1 2	1 2	1 2	1 1	1 1	2 2	1 1	1 1	1 2	1 1	1 1	1 1	1 2	1 1	2 2	1 2	1 2	1 2	1 2	1 1	1 2	1 1	1 1	1 1	1 1	1 1	1 1	1 1	1 1	1 2	1 2	1 1	1 2	1 2	1 2	1 2	1 1	1 1	1 1	1 2	1 1	1 1	1 1	1 1	1 1	2 2	1 2	1 1	1 1	1 1	1 2	1 2	1 1	1 1	1 1	1 2	1 1	1 2	1 2	1 2	1 1	1 2	1 2	1 1	1 2	1 2	1 1	1 2	1 1	1 2	1 1	1 1	1 1	1 1	1 2	1 1	1 2	1 1	1 1	1 1	1 2	1 1	1 2	1 1	1 2	1 1	1 2	2 2	2 2	1 2	1 2	0 0	2 2	2 2	1 1	1 2	1 1	1 2	1 2	1 1	1 2	1 2	1 2	1 2	1 1	1 2	1 1	1 1	2 2	1 1	1 1	1 1	1 2	1 1	1 2	1 1	1 1	2 2	1 1	1 2	1 2	1 1	1 1	2 2	1 2	1 2	1 2	1 2	1 2	1 1	1 1	1 2	1 1	1 2	1 2	1 2	1 2	1 2	1 2	1 1	1 2	2 2	2 2	1 1	1 2	1 2	1 1	1 2	1 1	1 1	1 1	1 1	1 1	1 1	2 2	1 2	2 2	1 1	1 2	1 1	1 2	1 2	2 2	2 2	1 1	2 2	1 1	1 2	1 2	2 2	1 2	1 2	1 2	1 1	1 2	1 2	1 1	1 2	1 2	2 2	1 2	1 1	1 2	2 2	1 1	1 2	1 1	1 1	1 2	1 1	1 1	1 1	1 2	1 2	1 1	1 2	1 1	1 2	1 1	1 2	1 1	1 2	1 1	2 2	1 1	1 1	2 2	1 1	1 1	1 2	1 2	1 1	1 1	1 1	1 2	1 1	1 2	1 1	1 1	1 1	1 2	1 1	1 2	1 2	1 1	1 2	1 2	1 2	1 2	1 1	1 1	1 1	1 2	1 1	1 2	1 1	1 1	1 2	1 1	2 2	1 1	1 2	1 1	1 2	1 1	2 2	1 2	1 1	1 1	1 2	1 1	1 2	1 2	1 1	2 2	1 2	1 2	2 2	1 2	1 1	1 1	1 2	1 1	1 2	2 2	1 2	2 2	1 2	1 2	2 2	2 2	1 2	1 1	1 1	1 2	1 1	1 2	1 1	1 1	1 1	1 1	2 2	1 1	1 2	1 2	1 2	1 2	1 1	1 1	1 2	1 2	1 1	1 1	1 2	1 1	1 2	1 2	1 2	1 1	1 2	1 2	1 2	1 2	1 1	1 2	1 2	1 1	1 2	1 1	1 2	1 1	1 2	1 2	1 2	1 1	1 1	1 2	1 2	1 2	1 2	1 1	1 1	1 1	1 1	1 2	1 2	1 2	1 1	1 2	1 1	1 2	1 2	1 2	1 1	1 2	1 2	1 2	1 2	1 1	1 1	1 2	1 1	1 1	1 2	1 2	1 2	1 1	1 2	1 1	1 2	1 2	1 1	2 2	1 1	1 2	1 2	1 2	1 1	1 1	1 2	1 1	2 2	1 2	1 2	1 1	1 1	1 2	2 2	1 2	1 1	1 1	1 2	1 1	1 2	1 2	1 1	1 1	1 2	1 2	2 2	2 2	1 1	1 2	1 1	1 2	1 1	1 1	1 2	1 1	1 1	1 1	1 1	1 1	1 2	1 1	1 1	1 2	1 2	1 1	1 1	1 2	1 2	1 1	1 2	1 1	1 2	2 2	2 2	1 1	1 1	1 1	1 1	1 2	0 0	1 2	1 2	1 1	1 2	1 1	1 2	1 2	1 1	2 2	0 0	1 2	1 1	1 1	1 2	0 0	0 0	1 1	1 1	1 2	1 1	1 2	1 1	1 2	1 1	1 2	2 2	1 1	1 1	1 1	2 2	1 2	2 2	1 2	1 2	1 1	1 1	1 2	2 2	2 2	1 1	1 2	1 2	1 2	1 1	1 1	2 2	1 1	1 1	1 1	1 1	1 1	1 1	2 2	1 2	1 2	1 1	1 1	1 2	1 2	1 2	1 2	1 1	1 1	1 2	1 1	1 2	1 2	1 1	1 2	1 2	1 2	2 2	1 1	1 2	1 1	1 2	1 2	1 1	1 1	2 2	1 2	1 1	1 1	1 1	1 2	1 1	1 1	1 2	1 1	1 1	1 1	1 2	1 2	1 2	1 1	1 2	1 2	1 2	1 1	1 1	1 2	1 2	1 2	2 2	1 2	1 1	1 2	1 1	2 2	1 2	1 1	1 1	1 2	1 2	1 2	1 2	1 2	1 2	1 1	2 2	1 2	1 1	1 1	1 2	1 1	1 2	1 2	1 1	2 2	1 2	1 1	1 1	1 2	1 2	1 1	1 2	1 2	1 2	1 1	1 1	1 2	1 2	1 2	2 2	1 1	1 2	1 2	1 2	1 1	1 2	1 2	1 2	1 1	1 1	1 1	1 2	2 2	1 1	1 1	1 1	1 2	1 2	2 2	0 0	1 2	1 2	1 2	1 2	1 2	1 1	1 1	1 2	2 2	1 1	2 2	1 1	1 2	2 2	1 1	0 0	1 1	1 2	1 1	1 2	1 1	1 1	1 2	2 2	1 1	1 1	1 2	1 1	1 1	1 1	2 2	1 2	1 2	1 1	1 1	1 2	2 2	1 2	2 2	1 1	1 2	1 2	1 2	1 2	1 2	1 2	1 1	1 2	1 1	1 1	1 2	2 2	2 2	1 1	1 2	1 2	1 1	1 2	1 2	1 2	2 2	1 2	1 1	1 2	0 0	1 2	1 1	2 2	1 1	1 2	1 1	1 2	2 2	1 2	1 2	1 2	1 2	1 2	1 1	1 1	1 1	1 1	1 1	1 1	1 2	1 1	1 2	1 1	1 2	1 2	1 2	1 1	1 2	1 2	2 2	2 2	1 2	1 2	1 1	1 1	1 2	1 1	1 1	1 2	1 2	1 2	2 2	1 2	1 2	1 1	1 1	1 2	1 2	1 2	1 2	1 1	1 1	1 2	1 2	1 1	1 1	1 2	1 1	1 1	1 1	1 1	0 0	2 2	1 2	1 1	1 2	1 1	1 2	1 2	1 1	1 1	1 1	1 2	1 1	1 2	1 1	1 2	1 1	1 2	1 1	1 2	0 0	1 1	1 1	1 2	1 1	1 2	1 1	1 2	1 1	1 1	1 2	1 2	1 2	1 2	2 2	1 1	1 2	1 2	1 1	1 1	1 2	1 1	2 2	2 2	1 1	1 2	1 1	1 2	1 2	1 2	1 1	1 1	1 1	1 2	1 1	1 1	1 1	1 2	1 1	1 2	1 2	1 2	2 2	1 2	1 2	2 2	1 2	1 1	1 2	1 2	1 2	1 1	1 2	1 2	1 2	1 2	1 2	1 1	1 2	1 2	1 2	1 2	1 1	1 1	0 0	2 2	0 0	1 1	1 1	1 2	1 2	1 1	1 2	1 2	1 2	1 1	2 2	1 1	1 2	1 1	1 1	1 1	1 1	1 2	1 2	1 2	1 2	1 2	1 1	1 1	1 2	1 2	1 1	1 2	1 1	1 2	1 1	1 2	1 1	1 1	1 2	1 1	1 2	1 2	1 1	1 1	1 2	1 1	1 1	1 1	1 2	1 2	1 1	1 2	1 1	1 2	2 2	1 1	1 2	1 2	1 2	1 2	1 2	1 1	1 2	1 1	1 2	1 2	1 1	1 1	1 1	1 1	1 2	1 2	1 1	1 2	0 0	1 2	1 1	1 2	1 1	1 2	1 2	1 2	1 1	1 1	1 2	1 2	1 2	1 1	1 2	2 2	1 2	1 2	1 2	1 2	1 1	1 1	1 1	2 2	1 1	1 1	1 2	1 1	1 1	1 1	1 1	0 0	1 2	1 2	1 1	1 1	1 2	1 1	1 1	1 1	1 1	1 1	1 2	1 1	1 1	1 2	1 2	1 2	1 1	1 1	1 1	1 2	1 2	1 1	1 1	1 2	2 2	1 1	1 2	1 1	1 1	1 2	1 2	2 2	1 1	1 2	0 0	1 1	1 1	1 1	1 1	1 1	1 2	2 2	1 2	1 2	1 1	1 2	1 1	1 2	1 2	1 1	1 1	1 2	1 2	1 1	1 2	1 1	1 2	0 0	1 2	1 1	1 1	1 2	1 1	1 1	1 2	2 2	1 1	2 2	1 1	1 2	1 2	2 2	1 2	2 2	1 2	2 2	1 2	1 2	1 1	1 2	1 1	1 1	1 2	1 1	1 2	1 1	1 2	1 1	1 2	0 0	1 1	1 1	1 1	1 2	1 2	1 2	0 0	1 2	1 2	1 2	1 1	1 1	1 1	1 2	1 2	1 2	0 0	1 2	1 1	1 2	1 1	1 1	1 2	1 1	1 2	1 2	1 2	1 1	0 0	1 2	1 1	2 2	1 2	1 2	2 2	1 2	1 2	1 2	1 1	2 2	1 2	1 2	1 1	1 1	1 1	0 0	1 2	1 1	1 2	1 1	1 1	1 1	1 2	1 1	1 2	1 1	1 1	1 2	1 2	1 1	1 2	1 2	1 1	1 1	1 2	1 1	1 1	1 1	2 2	2 2	1 1	1 1	1 2	1 2	1 1	1 2	1 1	1 2	1 1	1 2	1 1	1 1	0 0	2 2	1 1	1 2	1 1	1 2	1 1	1 1	1 2	2 2	1 1	0 0	1 2	1 1	1 1	1 1	2 2	1 1	1 1	1 2	1 2	1 1	1 2	1 1	1 1	1 1	1 2	1 1	2 2	1 2	1 1	1 2	1 2	1 2	1 2	1 2	1 2	1 2	1 2	1 2	1 2	1 2	0 0	1 1	1 2	1 2	1 2	1 2	1 1	1 2	1 1	1 1	1 1	2 2	1 1	1 1	1 2	1 1	1 1	1 1	1 1	1 2	1 2	1 1	1 2	1 1	2 2	1 1	1 1	1 1	1 2	1 1	1 1	1 2	1 2	1 1	1 1	1 1	1 1	1 1	1 1	1 1	1 2	1 1	2 2	1 2	1 2	1 1	1 2	1 2	1 2	1 1	1 1	2 2	1 1	1 2	1 1	1 1	1 1	1 1	1 2	1 1	1 1	1 1	2 2	1 1	1 2	1 1	2 2	1 1	1 2	2 2	1 2	1 2	1 1	1 2	1 2	1 2	1 2	1 2	1 2	1 2	1 2	1 1	2 2	1 1	1 1	1 2	1 2	1 1	1 1	1 2	2 2	2 2	1 2	1 1	1 1	1 1	1 2	1 2	1 1	1 2	1 2	1 2	1 2	1 1	1 1	1 1	1 1	1 1	1 2	1 2	1 2	1 2	1 2	1 1	1 2	1 2	1 2	1 2	1 2	1 1	1 2	0 0	1 1	1 2	1 2	1 1	1 2	1 2	1 2	1 2	2 2	1 2	1 1	1 1	1 2	1 2	1 1	1 2	1 1	1 1	1 2	1 1	1 2	2 2	1 2	1 1	1 2	1 2	1 2	1 1	1 2	1 1	1 2	1 1	1 1	1 1	1 1	1 2	1 1	1 2	1 1	1 2	1 2	1 1	1 1	1 1	1 1	1 2	1 2	1 1	1 1	1 2	1 2	1 2	1 2	1 1	1 2	1 1	1 1	1 2	1 1	1 1	1 2	1 1	1 2	1 2	1 2	1 2	1 1	1 1	1 2	2 2	1 1	1 2	1 1	1 2	1 2	1 1	1 2	2 2	0 0	1 1	2 2	1 2	1 2	1 2	1 1	2 2	0 0	1 2	1 2	1 2	1 2	1 2	1 2	1 2	2 2	2 2	1 2	1 1	1 1	1 1	1 2	1 2	1 2	1 2	2 2	1 2	1 2	1 2	1 2	1 2	1 1	2 2	2 2	1 1	1 2	1 2	1 1	1 1	1 1	1 2	1 1	1 2	1 1	1 1	1 1	1 1	1 2	1 2	1 2	2 2	1 2	1 1	1 1	1 2	2 2	2 2	1 1	0 0	1 2	0 0	1 2	1 1	1 1	1 1	1 2	1 2	1 2	1 2	1 2	1 2	1 2	1 2	1 1	1 1	2 2	1 2	1 2	1 1	1 1	1 2	1 1	1 2	1 1	1 1	2 2	1 1	1 2	1 1	2 2	1 1	1 1	1 2	1 2	1 1	0 0	1 2	1 1	1 2	2 2	1 2	1 2	1 1	1 1	1 1	1 2	1 1	1 1	1 2	0 0	1 2	1 2	1 2	1 1	1 2	1 2	1 2	1 2	1 1	1 1	1 2	1 2	1 1	1 1	1 2	1 2	2 2	2 2	1 2	1 2	1 2	1 2	1 1	1 2	1 1	1 1	1 2	1 2	1 1	1 1	1 2	1 1	1 2	1 2	1 2	1 1	1 1	1 1	1 1	1 2	1 1	1 2	1 1	1 1	1 1	1 1	1 2	1 2	1 1	1 2	1 1	1 1	1 2	1 1	1 1	1 1	1 1	1 2	1 1	1 1	1 1	1 1	1 1	1 2	1 2	1 2	1 1	1 2	2 2	1 2	1 1	1 1	1 1	1 1	1 2	1 1	1 2	1 1	1 2	1 1	1 2	1 2	1 1	1 2	1 1	1 1	1 2	2 2	1 1	1 1	1 2	1 1	1 2	1 2	1 1	1 2	1 1	1 1	2 2	1 2	1 2	1 1	1 1	1 1	1 2	2 2	1 1	1 2	1 1	1 2	1 1	1 2	1 1	1 2	1 1	1 2	1 2	1 1	1 1	1 1	1 1	1 1	1 1	1 1	1 2	1 1	2 2	1 1	1 1	1 2	1 1	1 1	1 2	1 1	1 2	1 1	1 1	1 1	1 1	1 2	1 1	1 1	1 2	1 1	1 2	1 2	1 2	1 2	1 1	1 1	1 1	1 2	1 1	1 1	1 1	1 2	2 2	1 1	1 1	1 1	1 2	1 1	1 2	2 2	1 1	1 2	1 2	1 2	2 2	0 0	1 1	1 1	1 1	1 2	1 1	1 2	1 2	1 2	0 0	1 1	1 2	1 2	1 2	1 2	1 1	1 1	1 2	1 1	1 1	1 2	1 2	1 1	1 1	1 1	1 1	1 2	1 1	1 1	1 1	1 1	2 2	1 2	1 2	1 2	1 2	1 1	2 2	1 1	1 1	1 1	2 2	1 2	1 1	1 2	1 2	1 2	1 2	1 2	1 1	1 1	1 2	1 2	2 2	1 1	1 2	1 2	1 1	1 1	1 2	1 1	1 2	1 2	1 1	1 1	2 2	1 1	1 2	1 2	1 2	1 1	1 2	1 1	1 1	1 1	1 1	1 2	1 2	1 1	1 2	1 1	1 2	1 1	1 2	1 2	1 2	1 1	2 2	1 1	1 2	1 1	2 2	1 1	1 1	1 1	1 2	1 1	1 1	1 1	1 1	1 1	1 1	1 1	1 1	1 1	1 1	1 1	1 1	1 2	1 1	1 2	1 1	1 2	1 2	1 2	1 1	1 2	1 2	1 1	1 1	1 2	1 1	1 2	1 2	1 2	1 1	1 1	1 1	1 1	1 1	1 2	1 1	1 2	1 2	1 2	1 1	1 1	1 2	1 1	1 2	1 1	1 1	1 1	1 2	1 2	1 1	1 2	1 2	1 1	1 1	1 2	1 1	1 2	2 2	1 1	1 1	1 1	1 2	1 1	1 1	2 2	2 2	1 1	1 2	1 1	1 2	1 2	1 2	1 1	1 2	1 1	1 2	1 1	1 1	1 1	2 2	1 2	1 1	2 2	1 1	1 2	0 0	2 2	1 1	1 1	1 2	1 2	2 2	1 2	2 2	1 2	1 2	0 0	1 1	1 2	1 2	0 0	1 1	2 2	1 2	1 2	1 2	1 1	1 2	1 1	1 1	1 2	1 1	1 1	1 2	1 1	1 2	1 1	1 2	1 2	1 1	1 2	1 2	1 1	1 1	1 2	1 2	2 2	2 2	2 2	1 1	2 2	1 1	1 1	1 2	1 1	1 1	1 1	1 1	1 1	1 1	1 1	2 2	1 1	1 2	1 1	1 2	1 1	1 1	1 1	1 2	1 2	2 2	2 2	1 2	1 1	1 1	1 1	1 1	1 1	1 1	1 2	1 1	2 2	1 1	1 1	1 1	2 2	0 0	1 1	2 2	1 1	1 2	1 2	1 1	1 2	1 2	1 2	1 2	1 2	1 2	1 1	1 1	1 1	1 1	1 1	1 1	1 2	1 1	1 2	1 2	2 2	1 1	1 2	1 2	1 1	1 2	2 2	1 1	1 1	1 1	1 2	1 2	1 1	2 2	1 1	2 2	1 1	1 1	1 2	1 1	1 1	1 1	1 2	1 2	1 2	1 2	1 2	1 1	2 2	1 2	1 1	1 1	1 2	1 1	2 2	1 2	1 1	1 1	0 0	1 2	0 0	1 1	1 1	1 1	1 2	1 1	1 1	1 2	1 2	1 2	1 1	1 2	1 2	2 2	1 1	1 2	1 1	1 1	1 1	1 1	2 2	2 2	1 2	1 1	1 1	1 2	1 2	2 2	1 1	1 2	1 2	1 1	1 1	1 2	1 2	1 1	1 1	1 1	1 2	2 2	1 2	1 2	1 2	1 1	2 2	1 1	1 2	0 0	1 1	1 2	1 1	1 2	1 1	1 1	1 2	1 1	1 1	1 2	1 2	1 2	1 1	1 1	1 2	1 1	2 2	1 1	1 1	2 2	1 1	1 1	1 2	1 1	1 1	1 1	1 1	1 2	1 1	1 1	1 1	1 1	2 2	1 1	1 1	1 2	1 2	1 2	1 2	1 2	1 2	1 1	1 1	1 2	1 1	1 2	1 2	0 0	0 0	1 1	1 1	1 2	1 2	1 2	1 2	2 2	1 1	1 1	1 2	1 1	1 1
1	008.x1.GQI120	800.x1.GQI122	400.x1.GQI122	0	0	1 1	1 1	1 2	1 2	1 2	1 2	1 2	1 1	1 2	2 2	1 2	1 2	1 1	1 2	1 2	1 2	1 2	1 2	1 2	1 2	1 1	1 2	1 2	1 1	1 2	1 1	1 2	1 2	1 2	1 1	1 1	1 2	1 2	1 2	1 1	2 2	1 1	1 1	1 1	1 1	1 1	2 2	1 1	1 1	1 1	1 2	1 1	1 2	1 2	1 2	1 2	1 1	1 2	1 1	1 2	1 1	1 2	2 2	1 2	1 2	1 1	1 1	1 2	1 1	2 2	1 2	1 2	1 1	1 1	1 2	1 1	1 2	2 2	1 1	1 2	1 2	1 1	1 2	1 1	1 1	1 1	1 1	1 1	1 2	1 2	1 1	0 0	1 2	1 2	1 2	1 1	1 2	1 1	2 2	1 1	1 2	2 2	1 1	1 1	1 2	1 1	1 1	1 2	1 2	1 1	1 1	1 2	1 2	1 2	1 1	1 2	1 2	1 1	1 1	1 1	1 2	1 1	1 2	1 1	0 0	1 2	1 2	1 2	1 2	1 2	1 2	1 2	1 1	1 2	1 2	1 2	1 2	1 1	1 2	1 1	2 2	1 2	1 1	2 2	1 2	1 1	1 1	1 2	1 2	1 2	1 1	1 2	1 2	1 1	1 1	1 2	1 1	1 2	1 2	1 2	1 2	1 2	1 1	1 1	1 1	1 2	1 2	1 1	2 2	1 1	1 2	1 1	1 2	1 2	1 1	1 1	1 1	1 1	2 2	1 2	2 2	1 2	1 2	1 1	1 2	1 2	1 2	1 1	2 2	1 2	1 2	1 2	1 1	2 2	1 2	1 2	1 1	1 2	1 1	1 1	2 2	1 1	1 1	1 2	1 1	1 2	1 1	1 1	2 2	1 2	1 2	1 2	1 2	1 1	1 1	1 1	1 1	1 1	1 1	1 1	1 2	1 2	1 1	1 2	1 2	1 1	1 2	1 1	1 2	1 1	1 2	1 2	1 2	1 2	2 2	1 2	1 1	1 1	1 2	1 1	1 1	1 2	1 2	1 2	1 2	1 2	1 2	1 1	1 2	1 2	2 2	1 2	1 1	1 2	1 1	1 2	1 1	2 2	1 2	1 1	1 2	1 2	2 2	2 2	1 2	1 1	1 2	1 2	2 2	1 2	1 1	1 2	1 1	1 1	1 2	2 2	1 1	1 1	1 1	2 2	1 2	1 2	1 2	1 2	1 2	1 2	1 1	1 2	1 1	1 1	1 2	1 1	1 2	1 2	1 2	1 1	1 1	1 1	1 2	1 1	1 2	1 2	1 1	1 2	2 2	1 1	1 1	1 2	1 1	1 2	1 1	1 2	1 1	1 2	1 1	1 1	1 1	1 2	1 2	1 1	1 1	1 2	1 2	1 2	1 1	2 2	1 1	1 2	1 1	1 2	1 2	1 2	1 1	1 2	1 2	2 2	1 1	1 2	1 2	1 2	1 2	1 2	1 2	1 2	1 1	1 2	1 2	1 2	2 2	1 1	1 1	1 2	1 2	1 2	1 1	1 2	1 2	2 2	2 2	1 1	1 1	1 2	2 2	1 1	1 2	1 2	1 2	1 1	1 1	1 2	1 2	1 2	1 2	1 1	1 2	1 2	2 2	1 2	1 1	1 1	1 2	1 1	1 1	1 1	1 2	1 1	1 1	1 1	1 2	1 1	1 1	2 2	1 2	1 1	1 1	1 2	1 1	1 2	1 2	1 1	1 2	1 2	2 2	1 2	1 2	1 1	1 1	1 1	1 2	1 1	1 2	1 2	1 1	1 2	1 2	1 2	1 2	1 2	1 1	1 2	1 1	1 2	1 2	1 2	1 2	1 1	1 2	1 2	1 1	1 1	1 2	1 1	1 1	1 2	1 2	1 1	1 2	1 2	1 2	1 1	1 1	1 1	1 2	1 1	1 1	1 2	1 1	1 2	1 1	2 2	1 2	1 2	1 2	1 1	1 2	1 2	1 1	1 1	2 2	1 1	1 1	1 1	1 2	1 2	1 1	1 2	1 1	1 1	1 1	1 2	1 2	2 2	2 2	1 2	1 1	1 2	1 2	1 1	1 2	1 2	1 1	1 2	2 2	1 1	1 1	1 2	1 2	1 2	2 2	1 2	1 1	1 2	1 1	1 1	1 1	1 2	1 1	1 1	1 1	1 1	1 2	1 2	1 2	1 1	1 2	1 2	1 2	1 1	1 2	1 2	1 2	2 2	1 1	1 2	2 2	1 2	1 2	1 2	1 1	1 2	1 1	1 2	1 2	1 1	1 1	1 2	1 2	1 2	1 1	1 1	1 2	1 2	1 2	1 1	1 2	1 1	1 2	1 2	1 2	1 2	1 1	1 2	1 2	1 1	1 2	1 2	1 2	1 1	1 2	1 1	1 2	1 1	1 2	1 2	1 2	1 1	1 2	1 1	1 2	1 2	1 1	1 1	1 2	1 1	1 1	1 1	1 2	0 0	1 1	1 1	1 1	1 2	1 2	1 2	1 1	1 2	1 2	1 2	1 1	1 2	1 1	1 2	2 2	1 2	1 2	1 1	1 2	1 1	1 1	1 1	1 1	1 1	1 1	1 2	1 1	1 1	1 1	1 2	1 2	1 1	1 2	1 2	1 2	1 1	1 2	1 1	1 2	1 2	1 2	1 2	1 2	1 2	1 1	2 2	1 2	1 1	1 2	1 2	1 1	1 2	1 2	2 2	1 2	1 2	1 1	1 2	1 2	1 1	1 2	1 2	1 2	1 1	1 2	1 1	1 1	1 1	2 2	1 2	1 1	1 2	1 2	1 2	1 2	2 2	1 1	1 1	1 2	1 2	2 2	1 2	1 1	1 2	1 2	2 2	1 1	1 1	1 2	1 1	1 1	1 1	1 2	1 1	1 1	1 2	1 2	1 1	1 2	1 2	1 1	1 1	1 2	1 2	1 1	1 1	1 2	2 2	1 2	1 1	1 1	1 1	1 1	1 2	1 2	1 1	1 2	1 2	1 2	1 1	1 2	2 2	1 1	1 1	1 1	1 2	1 2	1 2	1 1	1 1	1 2	1 2	1 2	1 2	1 2	1 2	1 2	1 2	1 1	1 2	1 2	1 2	1 2	1 2	1 2	1 2	1 1	1 2	1 1	1 1	1 2	1 2	1 1	1 1	1 2	1 2	1 2	2 2	1 2	1 2	1 2	1 1	1 1	1 1	1 2	1 2	1 2	1 1	1 1	1 2	1 2	1 2	1 1	1 2	1 2	1 1	1 1	1 1	1 2	1 2	1 2	1 1	1 1	1 1	1 1	1 2	1 1	1 2	1 2	1 1	1 2	1 2	1 2	1 1	2 2	2 2	1 2	1 1	1 2	1 1	1 1	1 1	1 2	1 2	1 1	1 1	1 2	1 2	1 1	1 2	1 1	1 2	1 2	1 2	1 1	1 2	1 2	1 2	1 2	1 2	1 2	1 2	1 2	1 1	1 1	1 1	1 1	1 1	1 2	1 1	1 2	1 2	1 1	1 2	1 2	2 2	1 1	1 2	1 1	1 2	1 1	1 2	1 2	1 2	1 1	1 1	1 1	1 2	1 2	1 2	1 2	1 1	1 2	1 1	1 2	1 1	1 2	1 2	1 2	1 2	1 2	1 2	1 2	1 1	1 1	1 1	1 2	1 2	1 2	1 2	1 2	1 1	1 2	2 2	1 1	1 2	1 2	1 1	1 2	1 1	1 2	1 1	1 2	2 2	1 2	1 1	1 2	2 2	1 2	1 2	1 1	1 1	1 2	1 2	1 1	2 2	1 2	1 1	1 2	1 2	1 1	1 2	1 1	1 2	1 2	1 1	1 1	1 2	1 1	1 2	1 2	1 1	1 2	1 1	1 2	1 1	1 1	1 1	1 2	1 1	1 2	1 2	1 1	1 1	1 2	1 1	1 1	1 2	1 1	1 1	1 2	2 2	1 2	1 1	1 1	1 2	1 1	1 2	1 2	1 2	1 1	1 2	1 2	1 1	1 2	1 2	1 2	1 1	1 1	1 1	1 2	1 2	1 1	1 1	1 2	1 1	1 2	1 1	1 1	1 2	1 2	1 1	2 2	1 2	1 2	1 1	1 2	1 1	1 1	1 1	1 1	1 2	1 2	1 1	1 1	1 2	2 2	1 1	1 2	1 2	1 2	1 1	0 0	1 2	1 1	1 2	1 1	1 2	1 2	1 1	0 0	1 2	1 2	1 1	1 2	1 2	1 1	1 2	1 2	1 2	1 1	1 2	1 1	1 2	1 2	1 2	1 2	1 2	1 1	1 2	1 2	1 1	1 2	1 1	1 2	1 1	1 2	1 2	1 2	1 2	1 2	1 2	1 1	0 0	1 2	1 2	1 2	1 1	1 1	1 2	1 2	1 1	1 1	1 2	1 1	1 2	1 2	2 2	1 1	1 1	1 1	1 2	1 2	2 2	1 2	1 2	1 2	2 2	1 1	1 2	1 2	1 1	1 2	1 2	1 2	1 1	1 2	1 1	1 1	1 2	2 2	1 1	1 2	1 2	1 2	2 2	1 1	1 1	1 1	1 1	2 2	1 1	1 1	1 2	1 2	1 2	2 2	1 1	1 2	1 2	1 1	1 2	1 1	1 2	1 2	1 2	1 2	1 1	1 2	1 1	1 2	1 1	1 2	1 2	1 1	1 1	1 2	1 2	1 1	1 1	1 2	1 2	1 1	1 1	1 1	1 1	1 1	1 1	1 2	1 2	1 2	1 1	1 2	1 1	2 2	1 2	1 2	1 1	1 1	1 1	1 1	1 1	1 1	1 2	1 2	2 2	1 1	1 1	1 2	1 2	1 1	1 2	1 2	1 1	1 2	1 1	1 1	1 2	1 1	1 2	1 2	1 1	1 2	1 2	1 2	1 2	1 2	1 2	1 2	1 2	1 2	1 2	1 1	1 2	1 2	1 2	1 1	2 2	1 1	1 2	1 1	1 2	1 2	1 2	1 2	1 2	1 1	1 2	1 2	1 2	1 2	1 2	0 0	1 2	1 2	2 2	1 2	1 2	1 2	1 2	1 2	1 1	1 2	1 1	1 2	1 2	1 2	1 2	1 1	1 1	1 2	1 1	1 2	1 2	1 1	1 2	1 1	1 2	1 2	1 2	1 2	2 2	1 1	1 2	1 1	1 1	1 2	1 2	1 1	1 1	1 2	1 2	1 1	2 2	1 2	1 2	1 2	1 2	1 1	1 2	1 2	1 2	1 1	1 2	1 2	1 2	1 2	1 1	1 2	0 0	1 1	1 2	1 2	1 1	1 2	1 2	1 2	1 2	1 2	1 2	1 1	1 2	1 2	1 2	1 1	1 2	1 2	2 2	1 2	1 2	1 2	1 2	1 1	1 2	1 1	1 1	1 2	1 1	1 1	1 1	1 1	1 1	1 2	1 1	1 2	2 2	1 2	1 1	1 1	1 2	1 1	1 2	1 2	1 1	1 1	2 2	1 2	1 2	1 1	1 2	1 1	1 1	1 2	1 1	1 1	1 1	1 1	1 2	1 1	1 2	1 1	1 2	1 1	1 2	1 2	1 2	1 1	1 2	1 2	0 0	1 2	1 1	1 1	1 1	1 1	1 2	1 2	1 2	1 1	1 2	1 2	1 2	1 2	1 1	1 2	1 2	1 1	1 1	1 2	1 2	1 1	1 2	1 1	1 2	1 1	1 1	1 2	1 2	1 2	1 2	1 1	1 2	1 1	2 2	1 2	1 2	1 2	1 2	1 1	1 2	1 2	1 1	1 2	1 2	1 2	1 1	1 2	1 2	1 1	1 2	1 1	1 2	1 2	1 1	1 2	1 1	1 1	1 2	1 1	1 1	2 2	1 1	1 1	1 2	1 2	1 2	1 2	1 1	1 1	1 2	1 2	1 2	1 1	1 1	1 1	1 2	1 2	1 2	1 2	1 2	2 2	1 2	2 2	1 2	1 2	1 2	1 2	1 1	1 1	1 2	1 2	1 1	1 2	1 1	2 2	1 2	2 2	1 2	1 2	1 1	1 2	1 2	1 1	1 2	1 1	1 2	1 1	1 1	2 2	0 0	1 2	1 1	1 2	1 2	1 2	2 2	1 2	1 1	1 1	1 1	1 1	1 1	1 1	2 2	1 1	1 1	1 1	1 2	1 2	1 1	1 1	1 2	1 2	1 2	1 1	1 2	1 1	1 2	1 2	1 2	1 1	1 2	1 2	1 1	1 2	1 2	1 2	1 2	1 2	1 2	1 2	1 2	1 1	1 2	1 2	1 2	1 2	1 1	2 2	1 2	2 2	1 2	1 1	1 2	1 1	1 1	1 2	2 2	1 1	1 2	1 2	1 1	1 1	1 1	1 2	1 2	1 2	1 1	1 2	1 1	1 1	1 2	1 2	1 2	0 0	1 1	1 2	1 2	1 2	1 1	1 1	1 1	1 2	1 2	1 2	1 1	1 2	1 2	1 2	1 2	1 1	1 1	1 1	1 1	1 2	1 1	1 1	1 1	2 2	1 2	1 1	1 2	1 1	1 2	1 2	1 1	1 2	1 1	1 2	2 2	1 2	1 2	1 2	1 1	1 2	1 2	1 2	1 1	1 2	1 1	1 2	0 0	1 1	1 1	1 1	1 1	1 1	1 2	1 1	1 2	1 2	1 1	1 1	1 2	1 2	1 2	1 1	1 2	1 2	1 2	1 1	1 2	1 2	1 2	1 2	1 2	1 2	1 2	1 1	1 2	1 2	1 2	1 2	1 1	1 1	1 2	1 2	1 2	1 1	1 2	1 2	1 2	1 2	1 2	1 2	1 1	1 1	1 1	1 2	1 2	1 1	1 2	1 1	2 2	1 1	1 1	1 2	1 2	1 2	1 1	1 2	1 2	1 1	1 2	1 1	1 2	1 1	1 2	1 1	1 2	1 1	1 1	1 2	1 2	1 1	1 2	1 2	1 2	1 1	1 1	1 2	1 1	1 2	1 2	1 2	1 2	1 1	1 2	1 1	1 2	1 1	1 2	1 2	1 2	1 1	1 2	1 2	2 2	2 2	1 2	1 2	1 1	1 2	1 2	2 2	1 2	1 1	1 2	1 2	1 2	1 2	1 2	1 2	1 1	1 1	2 2	1 2	1 1	1 1	1 1	1 1	1 1	1 1	1 2	1 1	1 1	1 2	1 1	1 2	1 1	1 1	1 2	1 1	1 2	1 1	1 2	1 2	1 1	1 2	1 2	1 2	2 2	1 1	1 2	1 2	1 2	1 1	1 1	1 2	1 2	1 2	1 1	1 2	1 2	1 2	1 2	1 1	1 2	1 1	1 1	1 2	1 2	1 2	1 2	1 2	1 2	1 2	1 1	1 1	1 1	1 1	1 1	1 1	1 2	1 1	1 1	1 1	1 1	1 1	1 2	1 2	1 1	1 1	1 2	1 2	1 1	1 2	1 1	1 1	1 2	2 2	1 2	1 2	0 0	1 1	1 2	1 1	1 1	1 1	2 2	1 1	1 1	1 2	1 2	2 2	1 2	1 2	1 2	1 2	1 2	1 1	1 1	1 2	1 2	1 1	1 1	2 2	1 2	1 2	1 2	1 1	1 2	1 2	1 1	1 1	1 1	1 1	1 1	1 2	1 1	1 2	1 2	1 2	1 2	1 1	1 1	1 2	1 1	1 2	1 2	1 1	1 2	1 1	1 2	1 1	1 2	1 2	1 2	1 1	1 1	1 2	1 2	1 1	1 2	1 1	1 2	1 1	1 1	1 2	1 1	1 2	1 2	1 1	1 1	1 2	1 2	2 2	1 1	1 2	1 2	1 1	1 1	1 1	1 2	1 2	1 2	1 2	1 2	1 1	1 2	1 2	1 1	1 2	1 2	1 2	1 1	1 1	1 1	1 2	1 1	1 1	1 2	1 2	1 2	1 1	2 2	1 2	1 2	1 1	1 2	1 1	2 2	1 2	1 2	1 2	1 1	1 1	1 1	1 1	1 1	1 2	2 2	1 2	1 1	1 2	1 1	1 1	1 2	1 2	1 2	1 2	1 2	1 2	1 1	1 1	1 1	2 2	1 2	1 2	1 1	1 1	1 2	1 1	1 1	1 1	1 1	1 2	1 2	1 2	1 2	1 1	1 1	1 1	1 2	1 2	1 2	1 1	1 1	0 0	1 2	1 1	1 2	1 2	1 2	1 1	1 2	1 2	1 2	1 2	1 2	1 2	1 2	1 1	1 1	1 2	1 1	1 2	1 1	1 2	1 1	1 1	1 1	1 2	1 2	1 1	1 1	1 2	1 2	1 1	1 2	0 0	1 1	2 2	1 1	1 1	1 1	1 2	1 2	1 2	2 2	1 1	1 1	1 2	1 2	1 2	2 2	1 2	2 2	1 2	2 2	1 1	1 2	1 1	1 2	1 2	1 2	1 2	1 1	1 2	1 1	1 1	1 2	1 2	1 1	1 1	1 2	1 2	1 2	1 2	1 2	1 1	1 2	1 2	1 1	2 2	1 1	1 1	1 2	1 2	1 2	1 2	1 1	1 2	1 2	1 1	1 2	1 2	1 2	1 2	1 1	1 1	1 1	1 1	1 1	2 2	1 2	1 1	1 2	1 2	1 1	1 2	1 2	1 2	1 2	1 2	1 2	1 2	1 2	1 2	1 1	1 2	1 1	1 2	1 2	1 2	1 2	1 1	1 2	1 2	1 2	1 2	1 1	1 2	1 2	1 2	1 1	1 2	1 1	1 1	1 2	1 2	1 2	1 2	1 2	1 2	1 2	1 1	1 1	1 1	1 1	1 1	1 1	1 2	1 2	1 2	1 2	1 2	1 2	1 2	1 2	1 2	1 2	1 1	1 2	1 2	1 2	1 2	1 1	1 1	1 2	1 2	1 2	1 1	1 2	1 2	1 2	1 2	1 2	1 2	1 1	1 1	2 2	1 2	1 1	1 1	1 2	1 1	2 2	1 1	1 1	1 1	1 1	1 2	2 2	1 2	1 2	1 1	1 1	1 1	1 1	1 2	1 1	1 1	1 2	1 2	1 2	1 1	1 2	1 1	1 2	1 2	1 2	1 2	1 2	2 2	1 2	1 2	1 2	1 2	1 1	1 1	1 1	1 1	1 1	1 1	1 2	1 2	1 1	1 2	1 2	1 1	1 1	1 2	1 1	1 1	1 2	1 1	1 2	1 2	1 1	1 1	1 1	1 2	1 2	0 0	1 2	1 2	1 2	1 1	1 2	1 2	1 2	1 1	1 2	1 2	1 2	1 1	1 1	1 1	1 2	1 2	1 1	1 2	1 1	1 2	1 2	1 1	1 2	1 2	1 2	1 2	1 2	1 1	2 2	1 1	1 1	1 2	1 2	1 1	1 2	1 2	1 1	1 2	2 2	1 1	1 2	1 1	1 1	1 1	1 1	1 2	1 2	1 1	1 2	1 1	1 2	2 2	1 1	1 1	1 2	1 1	1 1	1 2	1 2	1 2	1 2	1 2	1 2	1 2	1 2	1 2	1 2	1 1	1 2	1 1	1 2	1 2	2 2	1 2	1 2	1 2	1 2	1 1	1 1	1 1	1 2	1 2	1 2	1 1	1 2	1 2	1 2	1 2	1 1	1 1	1 1	1 2	1 2	1 1	1 2	1 1	1 2	1 1	1 2	1 2	2 2	1 2	1 2	2 2	2 2	1 1	1 2	1 1	1 2	1 1	1 1	1 1	1 2	1 2	1 1	2 2	1 1	1 2	1 1	1 1	1 2	1 2	1 2	1 2	1 2	1 1	1 2	1 2	1 2	1 2	1 2	2 2	1 2	1 2	1 2	1 1	1 2	1 1	1 1	1 1	1 2	1 1	1 2	1 2	1 2	1 2	1 2	1 2	1 2	1 1	1 2	2 2	1 2	1 2	1 2	1 1	1 1	1 1	1 1	1 1	1 1	1 2	2 2	1 1	1 1	1 1	1 1	1 2	1 1	1 2	1 2	1 1	1 2	1 1	1 1	2 2	1 1	1 2	1 2	1 2	1 2	1 2	1 1	1 2	1 2	1 2	1 2	1 2	1 2	1 2	1 2	1 2	1 2	1 2	2 2	1 2	1 1	2 2	1 2	1 2	1 1	1 2	1 1	1 1	1 2	1 1	1 2	2 2	1 2	1 1	1 2	1 2	1 1	1 1	1 2	1 1	1 1	1 1	1 2	1 1	1 2	1 1	1 2	1 1	1 2	1 2	1 2	1 2	1 2	1 2	1 2	1 2	1 1	1 1	1 2	2 2	2 2	1 2	1 1	1 1	1 2	1 2	1 2	1 2	1 1	1 2	1 2	1 2	1 1	1 1	1 2	1 2	1 2	1 2	1 1	2 2	1 2	1 1	1 2	1 1	1 2	2 2	1 2	1 1	1 1	1 1	1 2	1 2	1 2	1 2	1 2	1 2	1 2	1 2	1 1	1 1	1 1	2 2	1 1	1 1	1 2	1 1	1 2	1 1	1 1	1 2	1 2	1 2	1 1	1 2	1 1	1 1	1 1	1 2	1 1	1 1	1 2	1 1	1 2	1 1	1 2	1 1	1 1	1 1	1 2	1 1	1 2	1 1	1 1	1 2	1 2	1 2	1 1	1 1	1 2	1 1	1 2	1 1	1 2	1 2	1 2	1 1	1 1	1 1	2 2	1 2	1 1	1 1	1 2	1 2	1 1	1 2	1 1	1 2	1 2	2 2	2 2	1 1	1 1	1 2	1 2	1 2	1 1	1 2	1 2	1 2	1 1	1 2	1 2	1 2	1 2	1 2	1 1	1 2	1 2	1 2	1 1	1 2	1 1	1 2	2 2	1 2	1 1	1 2	1 2	1 2	1 1	1 1	1 1	1 2	1 1	1 2	1 1	1 2	1 1	1 1	2 2	1 2	1 1	1 2	1 1	2 2	1 2	1 2	1 1	1 2	2 2	1 2	1 2	1 2	1 2	1 2	1 2	1 1	1 1	1 2	1 2	1 1	1 1	1 2	1 2	1 2	1 1	1 1	1 1	1 2	1 1	1 2	1 1	1 2	2 2	1 2	1 2	1 2	1 2	1 1	1 2	1 2	1 2	1 1	1 2	1 1	2 2	1 2	2 2	1 2	1 1	1 2	1 2	1 1	1 1	1 1	1 1	1 2	1 2	1 2	1 2	1 2	1 1	1 1	1 1	1 1	1 2	1 2	1 1	2 2	1 2	1 1	1 2	1 2	1 2	1 2	1 2	1 1	1 1	1 1	1 2	1 2	1 1	1 1	1 1	1 2	1 2	1 2	2 2	1 2	1 2	1 2	1 2	1 1	1 2	1 1	1 2	1 1	1 2	1 1	1 2	1 1	1 2	1 2	1 2	1 1	1 2	1 2	0 0	1 2	1 1	2 2	1 2	1 2	1 2	1 2	1 2	1 2	1 2	1 2	1 1	1 2	1 2	1 2	1 1	1 1	1 1	1 2	1 1	1 2	1 1	1 2	1 2	1 2	1 1	1 1	1 2	1 1	2 2	1 1	1 2	2 2	1 1	1 2	0 0	1 1	1 1	1 1	1 2	1 2	1 1	1 2	2 2	1 1	1 2	1 1	1 2	1 1	1 2	1 1	1 2	1 1	1 1	1 2	1 2	2 2	2 2	1 2	1 2	1 1	1 1	1 1	1 1	1 2	1 1	1 1	1 1	1 1	1 1	1 1	1 1	1 1	0 0	1 2	1 2	2 2	1 1	1 2	1 2	1 2	1 1	1 2	1 2	1 2	1 1	1 2	1 1	1 1	1 2	1 1	1 1	1 1	1 2	2 2	1 2	1 2	2 2	1 2	1 2	1 1	1 2	1 1	1 1	1 2	1 1	2 2	1 2	1 1	1 1	1 2	1 2	2 2	1 1	1 1	1 2	1 1	1 2	2 2	1 2	1 2	1 1	1 1	1 1	1 1	2 2	1 2	1 1	1 2	1 2	1 1	1 2	1 1	1 2	1 2	1 2	1 2	1 1	1 1	1 1	1 1	1 2	1 1	1 1	1 2	1 1	1 2	1 2	1 2	1 1	1 2	1 1	1 2	1 1	2 2	1 2	1 2	1 2	1 1	1 2	1 2	1 2	2 2	1 2	1 2	1 2	1 2	1 2	1 2	1 2	1 1	1 2	1 1	1 2	1 1	1 1	1 2	1 2	1 2	1 2	1 1	1 2	1 1	1 2	1 2	1 1	1 1	1 2	2 2	1 1	1 2	1 2	1 2	1 1	1 1	1 2	1 1	1 2	1 1	1 1	1 2	0 0	1 2	1 2	1 1	2 2	1 1	1 1	1 1	1 2	1 2	1 2	1 2	1 2	1 2	1 2	1 1	1 2	1 1	1 2	1 2	1 2	2 2	1 1	2 2	1 1	1 2	1 1	1 2	1 2	1 1	1 2	1 2	1 1	1 2	1 2	2 2	1 1	1 1	1 1	1 1	1 2	1 1	1 2	1 2	1 1	1 2	1 1	1 2	1 1	1 2	1 2	1 1	1 1	2 2	1 1	1 1	2 2	1 2	1 1	1 2	1 2	1 2	1 2	1 1	1 2	1 2	1 1	1 2	1 2	2 2	1 2	1 1	1 1	1 1	1 2	1 2	1 1	1 1	1 2	1 2	1 2	1 2	1 2	1 1	1 1	1 1	1 1	1 2	1 2	1 2	1 1	2 2	1 2	1 1	1 2	1 2	0 0	1 1	2 2	1 1	1 2	1 1	1 2	1 1	1 2	1 2	1 1	1 1	1 2	1 2	1 2	1 2	1 2	1 2	1 2	2 2	1 1	1 2	1 2	1 2	1 1	1 2	1 1	1 2	1 1	1 1	1 1	1 2	1 1	1 2	1 2	1 2	1 1	1 2	0 0	1 2	1 2	1 1	1 1	1 1	1 1	2 2	1 2	1 2	1 1	1 1	1 2	1 2	1 1	1 1	1 2	1 1	1 2	1 2	1 2	1 2	0 0	1 2	1 1	1 2	1 2	1 2	1 1	1 2	1 2	1 1	1 2	1 1	1 2	1 2	1 1	1 2	1 1	1 1	1 1	1 1	1 1	1 2	1 1	1 2	1 2	1 2	1 2	1 2	1 1	2 2	1 2	1 2	1 2	1 1	1 1	1 1	1 1	2 2	1 2	1 2	1 1	1 2	2 2	1 2	0 0	1 2	1 1	1 2	1 2	1 2	1 2	1 2	1 1	1 2	1 2	1 1	1 2	1 2	1 1	1 2	1 2	1 2	1 1	1 1	1 2	1 1	2 2	1 2	1 2	1 1	1 2	1 1	1 1	2 2	2 2	1 1	1 1	1 1	1 1	1 2	1 1	1 2	2 2	1 2	1 2	1 2	1 2	1 1	1 2	1 2	1 2	1 1	1 1	1 1	1 2	1 2	1 1	2 2	1 1	1 2	1 1	2 2	1 2	2 2	1 2	1 2	1 2	1 2	1 1	1 2	1 2	1 1	1 2	1 2	1 1	1 1	1 2	1 2	1 2	1 1	1 1	1 1	1 1	2 2	1 2	1 1	1 2	1 1	1 2	2 2	1 1	1 2	1 2	1 2	1 1	1 1	1 2	1 2	1 2	1 1	1 2	1 2	1 1	1 1	1 2	1 2	1 1	1 1	1 2	1 1	2 2	1 2	2 2	1 2	1 2	1 1	2 2	1 1	1 2	1 2	1 2	1 1	1 1	1 1	1 1	1 1	1 2	1 1	1 1	1 1	1 2	1 1	1 1	1 1	1 2	1 2	1 2	1 1	1 2	1 2	1 1	1 2	1 2	1 2	1 1	1 2	1 2	1 1	1 1	1 2	1 2	1 2	1 1	1 2	1 2	1 2	1 2	1 1	1 2	1 1	1 2	1 2	1 2	1 2	1 2	1 1	1 1	1 1	1 1	1 1	1 2	1 2	1 2	1 2	1 2	1 2	1 2	1 2	1 2	1 1	1 1	1 2	1 2	1 2	1 1	1 1	1 1	1 1	1 2	1 2	1 1	1 1	1 2	1 2	1 1	1 2	0 0	1 1	1 2	2 2	1 2	1 2	1 2	1 1	1 2	1 2	1 1	1 2	1 2	1 1	1 1	1 2	1 2	1 2	1 2	1 2	1 2	1 2	1 1	1 1	1 2	1 1	1 1	1 2	1 2	1 1	1 1	1 2	1 1	1 2	1 2	1 1	1 1	1 2	1 2	1 2	2 2	1 1	1 2	1 1	1 1	2 2	1 2	1 2	1 2	1 1	1 2	2 2	1 1	1 2	1 1	1 2	1 2	1 2	1 1	1 2	1 1	1 1	1 2	1 2	1 1	1 1	1 2	1 2	1 2	1 2	1 2	1 2	1 1	2 2	1 2	1 1	1 1	1 1	1 1	1 2	1 2	1 2	1 1	1 1	1 2	1 1	1 2	1 2	1 2	0 0	1 1	1 1	1 2	1 1	1 1	1 2	1 2	1 2	1 1	1 1	1 1	1 2	1 2	1 1	1 1	1 1	1 2	1 2	1 2	1 1	1 2	1 2	1 2	0 0	1 2	1 2	1 1	1 1	1 2	1 1	1 2	1 1	1 2	2 2	1 1	1 1	1 1	1 1	1 1	1 2	1 2	1 1	2 2	1 2	1 1	1 1	1 1	1 2	1 1	1 1	1 2	2 2	1 2	1 1	1 1	1 1	1 2	1 2	1 1	1 2	1 2	1 1	1 1	1 1	1 2	1 2	2 2	1 1	1 1	1 2	0 0	1 1	1 2	1 1	1 2	1 1	2 2	1 2	1 1	1 1	1 2	1 2	1 1	1 2	1 2	1 2	1 2	0 0	2 2	1 2	1 1	1 1	1 2	1 2	1 2	1 1	1 2	1 2	1 2	1 1	1 1	1 1	1 2	1 2	1 2	1 1	1 1	1 1	1 1	1 2	1 1	1 1	1 1	1 1	1 1	1 2	1 2	1 1	1 1	1 2	1 2	1 2	1 1	1 2	1 2	1 2	1 2	2 2	1 2	1 1	1 1	1 2	1 2	1 2	1 2	1 1	1 1	1 2	1 2	2 2	1 1	1 2	1 2	1 1	1 1	1 2	1 1	2 2	1 1	1 2	1 2	1 2	1 1	1 2	1 1	1 2	1 2	1 2	1 2	1 1	1 2	1 1	1 2	1 2	1 1	1 2	1 1	1 2	1 2	1 2	1 2	1 2	1 2	1 1	1 2	1 2	1 2	1 2	1 2	1 2	1 2	2 2	1 2	1 2	1 2	1 2	1 1	1 1	1 2	1 2	1 2	1 1	1 2	0 0	1 2	1 1	1 2	1 2	1 1	1 1	1 2	1 2	1 2	1 1	1 1	1 1	1 1	1 2	1 1	1 2	1 2	1 2	1 1	1 1	1 1	1 2	1 1	1 1	1 2	1 2	1 2	1 2	1 2	1 2	1 2	1 2	1 2	1 2	1 2	1 2	1 2	1 2	1 2	1 1	1 1	1 2	1 1	1 2	1 1	1 2	0 0	1 1	1 1	1 2	1 2	1 1	1 1	1 2	1 1	1 2	1 2	1 2	1 2	1 2	1 1	1 1	1 1	1 2	1 2	1 2	1 2	1 1	1 2	1 2	2 2	1 2	1 1	1 2	1 1	1 1	1 2	1 1	1 2	1 1	1 2	1 2	1 1	1 1	1 2	1 2	1 1	1 1	2 2	1 2	1 2	1 2	1 2	1 2	1 2	1 2	1 1	1 2	1 1	1 1	1 2	1 2	1 1	1 1	1 1	1 2	1 2	1 2	1 2	1 2	1 1	1 1	1 2	1 2	1 1	1 2	1 2	1 2	1 2	1 1	1 2	0 0	1 1	1 1	1 2	1 1	1 2	1 2	1 1	1 2	1 1	1 2	1 2	1 2	1 2	1 2	2 2	2 2	1 1	1 2	1 2	1 2	1 2	1 2	1 1	1 2	1 2	1 2	1 2	1 2	1 2	1 1	1 2	1 1	1 2	1 2	1 1	1 1	1 1	1 2	1 2	1 1	1 1	1 1	1 2	1 2	1 2	1 2	1 2	1 1	1 2	1 2	1 1	1 1	1 1	1 1	1 1	1 1	2 2	2 2	1 1	1 1	1 1	1 2	1 2	1 2	1 1	1 1	2 2	1 2	1 2	1 2	1 2	1 1	1 1	1 2	1 2	1 1	1 2	1 2	1 2	1 2	1 1	1 2	1 2	1 1	1 1	1 1	1 1	1 2	1 1	1 2	1 2	1 2	1 2	1 2	1 1	1 2	1 2	1 2	1 2	1 2	1 2	1 2	2 2	1 2	1 1	1 1	1 2	1 1	1 2	2 2	1 2	1 2	1 1	1 1	1 2	1 2	1 2	1 1	1 2	1 1	1 1	1 2	1 1	1 1	1 2	1 1	1 1	1 2	1 1	1 2	1 1	1 2	1 1	1 1	1 1	2 2	1 2	1 2	1 2	1 1	1 2	1 1	1 2	1 2	1 1	2 2	1 1	1 1	1 1	1 2	1 2	1 2	1 2	1 1	1 2	1 2	2 2	1 1	1 1	1 2	1 1	1 2	1 1	1 2	1 1	0 0	1 1	1 2	1 2	1 2	1 1	1 2	1 1	1 2	1 1	1 2	1 1	1 1	1 1	1 2	1 2	1 1	1 1	1 2	1 2	1 1	1 1	1 1	1 2	1 2	1 2	1 2	1 2	1 2	1 1	1 2	1 2	1 1	1 2	1 2	1 1	1 2	1 2	2 2	1 2	1 1	1 2	1 1	1 2	1 2	1 2	1 2	1 2	1 2	1 2	1 1	1 2	1 1	1 1	1 2	1 1	1 2	1 2	2 2	1 2	2 2	1 1	1 2	2 2	1 1	2 2	1 1	1 2	1 1	1 2	1 1	1 2	1 1	1 2	1 2	2 2	1 1	1 2	1 2	1 2	1 1	1 2	1 1	1 2	2 2	2 2	1 1	1 2	1 2	1 2	1 1	1 1	1 1	1 2	1 1	2 2	1 2	1 1	1 2	2 2	1 1	1 2	1 2	1 2	1 1	1 2	1 1	1 2	1 2	1 2	1 1	1 1	1 2	1 2	1 2	1 2	1 2	1 2	1 2	1 1	1 2	1 2	1 2	1 1	1 1	1 1	1 1	1 2	1 1	1 2	1 2	1 1	1 1	1 2	1 2	1 2	1 2	1 1	1 2	1 2	1 1	1 1	1 2	1 1	1 2	2 2	1 2	1 1	1 1	1 1	1 2	1 2	1 2	1 2	1 1	1 1	1 2	1 1	1 1	1 2	1 2	1 1	1 2	1 2	2 2	1 2	1 2	1 2	1 2	1 2	1 2	1 2	1 1	1 2	1 2	1 2	1 2	1 2	1 2	0 0	1 2	1 2	1 2	1 1	1 1	1 1	1 2	1 2	1 2	1 1	1 2	1 1	1 2	1 2	1 2	1 2	1 2	1 2	1 2	1 1	1 2	1 2	1 2	1 2	1 2	1 1	1 2	1 2	1 2	1 2	1 1	1 1	1 2	1 2	1 1	1 2	1 1	1 1	1 2	1 2	1 2	1 2	1 2	1 2	1 2	1 2	0 0	1 1	1 2	1 1	1 2	1 2	1 2	1 2	1 1	1 2	1 2	2 2	1 1	1 1	2 2	1 2	1 2	1 2	1 1	1 2	1 1	1 2	1 2	1 1	1 2	1 2	1 1	1 2	1 2	1 1	1 1	1 2	1 1	1 2	1 2	1 1	1 2	1 2	1 2	1 2	2 2	1 2	1 2	1 2	1 1	1 2	1 2	1 1	1 1	0 0	1 1	1 2	1 2	2 2	1 2	1 2	1 2	1 1	1 1	1 1	1 1	1 2	1 1	1 2	1 2	1 1	1 2	1 1	1 1	1 2	1 2	1 2	1 1	1 1	1 2	1 1	1 1	1 1	1 2	1 2	1 2	1 2	1 2	1 2	1 2	2 2	1 2	1 2	1 1	1 2	1 2	1 1	2 2	2 2	1 2	1 2	1 1	1 1	1 2	2 2	1 1	1 2	1 2	2 2	2 2	1 2	1 2	1 2	1 1	1 2	1 2	1 2	1 1	1 2	1 1	1 2	1 1	1 1	1 1	1 2	1 1	1 1	1 2	1 2	1 1	1 2	1 2	2 2	1 1	1 2	1 2	1 1	1 1	1 1	1 2	1 2	1 2	1 1	1 1	1 2	1 2	1 2	1 2	1 1	1 1	1 1	1 1	1 1	1 2	1 1	1 1	1 2	1 2	1 2	2 2	1 2	1 1	1 2	1 2	1 1	1 1	1 2	1 1	1 1	1 2	1 2	1 2	1 2	1 1	1 1	1 2	1 2	1 2	1 2	1 2	1 2	1 2	1 1	2 2	1 1	1 1	1 1	1 1	1 1	1 1	1 2	2 2	1 2	1 2	1 2	1 2	1 2	1 1	1 2	1 2	1 1	1 2	1 2	1 2	2 2	1 1	1 2	1 2	1 1	1 1	1 2	1 2	1 1	2 2	1 1	1 2	1 2	1 1	1 2	1 2	1 2	1 2	1 2	1 2	1 2	1 2	1 1	1 1	1 1	1 2	1 1	1 2	1 2	1 2	1 2	1 2	1 1	1 1	2 2	1 2	1 2	1 1	1 2	1 2	1 2	1 1	1 2	1 1	1 1	1 1	1 1	1 1	1 1	1 1	1 1	1 1	1 2	1 2	1 2	1 2	1 1	1 1	1 2	1 1	1 2	1 2	1 2	1 1	1 2	1 2	1 2	1 2	1 2	1 2	1 1	1 2	1 2	1 1	1 2	2 2	1 2	1 2	1 2	1 2	1 1	1 1	2 2	1 1	1 1	1 2	1 2	1 2	1 1	1 1	1 2	1 1	1 2	1 2	1 2	1 2	1 1	2 2	1 2	1 1	2 2	1 2	1 2	1 2	1 2	1 1	1 2	1 1	1 2	1 1	1 2	1 2	1 2	1 1	1 2	1 2	1 2	1 2	1 1	1 2	1 1	1 1	1 2	1 2	1 2	1 1	1 2	1 2	1 1	1 2	1 1	1 2	1 2	1 2	1 2	1 2	0 0	1 2	1 1	1 2	1 1	2 2	1 1	1 2	1 2	1 1	1 2	1 2	2 2	1 2	1 2	1 2	1 1	1 2	1 2	1 1	1 1	1 2	2 2	1 2	1 2	1 1	1 1	1 2	1 1	1 1	1 1	2 2	1 2	1 2	1 2	1 2	2 2	1 2	1 2	1 2	1 2	1 2	1 2	1 2	1 1	1 2	1 2	1 2	1 2	1 2	2 2	1 1	1 1	1 1	1 1	1 2	1 1	1 2	1 2	1 1	1 2	1 2	1 2	1 2	1 2	1 1	1 1	1 2	1 1	1 2	1 2	1 1	1 1	1 2	2 2	1 2	1 1	1 2	1 2	1 2	1 2	1 2	1 2	1 2	1 2	1 2	1 2	1 2	1 2	1 1	1 2	1 2	1 2	1 1	1 2	1 1	1 1	1 1	2 2	1 1	1 1	1 2	1 2	1 2	1 1	1 2	1 2	1 2	1 2	1 2	1 2	1 2	2 2	1 2	1 2	1 1	1 2	1 2	1 2	1 2	1 1	1 2	1 1	1 2	1 2	2 2	1 2	1 2	1 1	1 2	1 1	1 1	1 2	1 1	2 2	1 1	1 1	1 1	1 2	1 1	1 1	1 2	1 2	1 2	1 2	1 2	1 1	1 2	1 1	1 1	1 1	1 1	1 1	1 2	1 1	1 1	2 2	1 1	1 1	2 2	1 1	1 2	1 1	1 2	1 2	1 1	1 1	1 2	1 2	1 2	1 2	1 2	1 1	1 2	1 1	1 2	1 1	1 2	1 2	1 2	1 2	1 1	1 2	1 2	1 2	2 2	1 2	1 2	1 2	1 2	1 1	1 2	1 2	1 2	1 2	1 1	1 1	1 1	1 2	1 2	1 2	1 2	1 2	1 2	2 2	2 2	1 1	1 1	1 2	1 2	1 1	1 2	1 1	1 2	2 2	1 2	1 1	1 1	1 2	1 2	1 2	1 2	1 2	1 2	1 2	1 2	1 2	1 1	1 1	1 2	1 2	1 1	1 2	1 2	1 2	1 2	1 1	1 2	1 1	1 2	1 1	1 1	1 1	1 2	2 2	1 2	1 1	1 2	1 1	1 1	1 1	1 1	1 2	1 2	1 2	1 1	1 2	1 1	1 1	1 2	1 1	1 1	1 2	1 1	1 2	1 2	1 1	1 2	1 2	1 1	1 1	1 2	1 1	1 1	1 2	1 1	1 2	2 2	1 1	1 1	1 2	1 2	1 2	1 2	2 2	1 2	1 2	1 1	1 1	1 1	1 2	1 1	1 1	2 2	1 2	1 2	1 2	1 1	1 1	1 2	1 1	1 1	1 1	2 2	1 2	1 1	1 2	1 2	1 2	1 2	1 1	1 2	1 1	1 2	1 2	1 1	1 1	1 2	1 2	1 2	1 2	2 2	1 2	1 1	1 1	1 2	1 1	1 2	1 1	1 2	1 1	1 2	1 2	2 2	1 1	1 2	1 2	1 1	1 2	1 1	1 2	1 2	1 1	1 2	1 1	1 2	1 2	1 2	1 2	1 2	1 1	2 2	1 1	1 2	1 1	1 2	1 2	1 2	1 1	2 2	1 1	1 2	1 1	0 0	1 1	1 2	1 2	1 2	1 2	1 2	1 1	1 1	1 2	1 2	1 2	1 2	1 2	1 1	1 1	1 2	1 1	1 2	1 1	1 1	1 2	1 1	1 2	1 2	1 1	1 2	1 1	1 2	1 2	1 1	1 2	1 2	1 2	1 2	1 1	1 1	1 1	1 1	1 1	1 1	1 1	1 1	1 2	1 2	1 2	1 1	1 2	1 2	1 2	1 2	1 1	1 2	1 1	1 1	1 2	1 1	1 1	1 1	1 2	1 1	2 2	1 1	1 1	1 2	1 2	1 2	1 2	1 2	1 2	1 2	1 2	1 2	1 1	1 1	1 2	1 1	1 1	1 2	1 2	1 2	1 2	1 2	1 2	1 2	1 2	1 2	1 2	1 1	1 2	1 1	1 2	1 1	1 2	1 2	2 2	1 2	1 1	1 2	1 2	1 1	1 1	1 1	1 1	1 2	1 1	1 1	1 2	1 2	1 2	1 2	1 1	1 1	2 2	1 2	1 2	1 1	1 2	1 2	1 1	1 2	1 2	1 1	2 2	1 2	1 2	1 2	1 1	1 2	1 1	1 2	1 1	1 2	1 1	1 2	2 2	1 2	1 1	1 2	1 1	1 1	1 2	1 2	1 2	1 2	1 2	1 2	2 2	1 1	1 2	1 2	1 2	1 1	1 2	1 2	1 2	1 2	1 2	1 1	1 2	1 1	1 2	1 1	1 2	1 2	1 1	1 1	1 2	1 2	1 2	1 1	1 1	1 1	1 2	1 1	1 1	1 2	1 2	1 2	1 1	1 2	1 2	1 2	1 1	1 2	1 1	1 2	1 1	1 2	1 1	1 1	1 2	1 2	1 2	1 2	1 2	1 1	1 2	1 2	1 1	1 2	1 2	1 2	1 1	1 1	1 2	1 1	1 2	1 1	1 2	1 2	1 2	1 2	1 1	1 1	1 2	1 2	1 2	1 2	1 2	1 2	1 1	1 1	1 2	1 1	1 2	1 1	1 2	2 2	1 2	1 2	1 2	1 1	1 1	1 2	1 2	1 2	1 1	1 1	1 1	2 2	1 2	0 0	1 1	1 2	1 2	1 1	1 1	1 2	1 2	1 2	1 2	1 2	1 2	1 2	2 2	1 2	1 2	1 1	1 2	1 2	1 2	1 1	1 2	2 2	1 2	1 1	1 1	1 1	1 2	1 1	1 1	1 1	1 1	1 2	1 1	1 2	1 2	1 1	1 2	1 1	1 2	1 2	0 0	2 2	1 2	1 2	1 1	2 2	1 1	1 1	1 2	1 1	1 2	1 2	1 1	1 1	1 2	1 2	1 2	1 2	1 2	1 1	2 2	1 2	1 1	1 1	1 2	1 1	1 2	1 2	1 1	1 1	1 2	1 1	1 1	1 2	1 1	1 2	1 1	1 2	1 2	2 2	1 1	1 1	1 1	1 2	1 1	1 1	1 1	1 2	1 1	1 1	1 2	1 1	1 1	1 1	1 2	1 1	1 2	1 2	1 1	1 2	1 2	1 1	1 2	1 2	1 2	1 2	1 2	1 1	1 2	2 2	1 2	2 2	1 1	1 1	1 1	1 2	1 1	0 0	1 1	1 2	1 2	1 1	1 2	1 2	1 1	1 1	1 2	2 2	1 2	1 1	1 2	1 2	1 1	1 2	1 2	1 1	1 2	1 2	1 2	1 1	1 1	1 2	1 1	1 2	1 2	1 1	1 2	1 1	1 2	1 1	1 1	1 1	1 2	1 2	1 2	1 1	1 2	1 1	1 2	1 1	1 1	1 2	1 2	1 1	1 2	1 2	1 2	1 2	1 2	1 2	1 2	1 2	1 1	1 1	1 2	1 1	2 2	1 1	1 1	1 2	1 1	2 2	1 1	1 2	1 2	1 1	1 1	1 1	1 2	1 2	1 1	1 1	1 1	2 2	1 1	1 2	1 2	1 2	1 1	1 2	1 1	1 2	1 2	1 1	1 2	2 2	1 1	1 2	1 1	1 1	1 2	2 2	1 1	1 2	1 2	1 2	1 2	1 2	1 2	1 2	1 2	1 2	1 2	1 2	1 2	1 2	1 2	1 2	1 2	1 2	1 2	1 2	1 2	1 1	1 1	1 1	1 2	1 2	1 1	1 1	1 2	2 2	1 1	2 2	1 2	1 2	1 2	1 1	1 1	1 2	1 1	1 2	1 1	1 1	1 2	1 1	1 2	1 2	1 2	1 1	1 1	1 1	1 2	1 1	1 2	1 1	1 1	1 2	1 2	1 1	1 2	1 1	1 2	1 1	1 1	1 1	1 2	1 2	2 2	1 2	1 1	1 2	1 2	1 2	1 1	1 2	1 1	1 1	1 1	1 2	1 1	1 2	1 1	1 2	1 2	1 2	1 2	2 2	1 2	1 2	1 2	2 2	1 2	1 1	1 2	1 2	1 1	1 2	1 2	1 1	1 1	1 1	1 2	1 1	1 1	1 2	1 1	1 1	1 1	1 2	1 2	1 2	1 1	1 2	1 1	1 2	1 2	1 1	1 1	1 2	1 1	1 1	1 1	1 2	1 2	1 2	1 1	1 1	1 2	1 2	1 2	1 2	1 2	1 1	2 2	1 1	1 1	1 2	1 1	1 2	1 1	1 2	1 1	1 2	1 2	1 1	1 2	1 2	1 2	1 1	1 1	1 1	1 2	1 2	1 1	1 2	1 2	1 2	1 2	1 2	1 1	1 2	1 2	1 2	1 1	1 1	1 2	1 2	1 1	0 0	1 2	1 2	1 1	1 2	1 2	1 2	1 2	1 2	1 1	1 1	1 1	1 1	1 2	2 2	1 2	1 2	1 1	1 2	1 1	1 1	1 2	1 2	1 1	1 1	1 2	1 1	1 2	1 2	1 2	1 1	1 2	1 2	1 2	1 1	1 1	1 2	1 1	1 1	1 2	1 1	1 2	1 2	1 2	1 1	0 0	2 2	1 2	1 1	1 1	1 2	1 2	1 2	1 2	1 2	1 2	1 2	1 2	1 2	1 1	1 2	1 2	1 2	1 1	1 2	0 0	1 2	1 1	1 1	1 2	1 2	1 2	1 2	1 2	1 2	1 2	1 1	1 2	1 1	1 2	1 2	1 2	1 2	1 2	1 1	1 2	1 1	1 1	1 1	1 2	1 1	1 1	1 1	1 2	1 1	1 1	1 2	1 2	1 2	1 1	1 1	1 2	1 2	1 1	1 2	1 1	1 2	1 1	1 2	1 2	1 2	1 2	1 1	1 2	1 1	1 2	1 2	1 2	1 2	1 2	1 2	1 1	1 2	1 1	1 2	1 1	1 2	1 2	1 2	1 2	1 2	1 2	1 1	1 1	1 1	1 1	1 2	2 2	1 1	1 2	1 2	1 2	2 2	1 1	1 2	1 1	1 1	1 1	1 2	1 2	1 2	1 2	1 1	2 2	1 1	1 2	1 1	1 2	1 1	1 2	1 2	1 2	1 2	1 2	1 1	1 1	1 1	1 1	1 2	1 2	1 2	1 2	1 2	1 2	1 1	1 2	1 2	1 2	1 1	1 2	1 2	1 2	1 1	1 1	1 2	2 2	1 1	1 1	1 2	1 2	1 1	2 2	1 1	1 1	1 1	1 1	1 1	1 2	1 1	1 2	1 1	1 2	1 2	1 1	1 1	1 1	1 1	1 2	1 2	1 1	1 1	1 2	1 2	2 2	1 1	1 2	1 2	1 2	1 2	1 2	2 2	1 2	1 2	1 1	1 2	1 1	1 1	1 2	1 1	1 1	1 1	1 1	1 2	1 1	1 2	1 2	1 2	1 2	1 2	1 2	1 1	1 2	1 2	1 1	1 2	1 2	1 2	1 1	1 1	1 1	1 2	1 1	1 1	1 2	1 2	1 2	1 2	1 2	1 1	1 2	1 2	1 1	1 2	1 2	2 2	1 2	1 2	1 2	1 1	1 2	1 2	2 2	1 1	1 2	1 1	1 2	2 2	2 2	1 2	1 2	1 1	1 1	1 2	1 2	1 2	1 1	2 2	1 1	1 2	0 0	1 2	1 2	1 2	1 2	1 2	1 2	1 2	1 2	1 2	1 2	1 2	1 2	1 2	1 2	1 1	1 1	1 1	1 1	1 1	1 2	1 2	1 1	1 2	1 2	1 1	1 1	1 2	1 1	1 1	2 2	1 2	1 2	1 2	1 2	1 2	1 2	1 1	2 2	1 2	1 1	1 2	1 2	2 2	1 1	1 1	1 1	1 2	1 1	1 2	1 2	1 1	1 1	1 1	1 2	1 2	1 1	1 2	1 2	1 1	1 2	1 2	1 1	2 2	1 1	1 1	1 1	1 2	1 2	1 2	1 1	1 2	1 2	1 1	1 2	1 1	1 2	1 1	1 1	1 2	1 2	1 2	1 2	1 1	1 1	1 2	1 2	1 2	1 2	1 2	1 1	1 2	1 1	1 2	1 1	1 2	1 2	1 2	1 1	2 2	1 1	1 1	1 2	1 1	1 2	1 2	1 2	1 2	1 1	1 1	1 1	1 1	1 2	1 2	1 1	1 2	1 2	1 2	1 1	2 2	1 2	1 2	1 2	1 2	1 1	1 2	1 1	1 1	1 2	0 0	1 1	1 2	1 1	1 2	1 2	1 2	1 1	1 2	1 2	1 2	1 2	1 2	1 2	1 2	1 2	0 0	1 2	1 2	1 2	1 2	1 2	1 2	1 2	1 2	1 2	1 2	1 2	1 2	1 1	1 2	1 2	2 2	2 2	1 2	0 0	1 1	1 2	2 2	1 2	1 2	1 1	1 2	1 1	1 2	1 2	1 1	1 2	1 1	1 1	2 2	1 1	1 1	2 2	1 1	1 2	1 2	1 2	1 2	1 1	1 2	1 1	1 2	1 2	1 2	1 1	1 2	1 2	1 2	1 2	1 2	1 1	1 1	1 2	1 1	1 2	1 1	1 1	1 2	1 1	1 2	1 1	1 1	1 1	1 2	1 2	1 2	1 2	1 2	1 2	1 2	1 2	1 2	1 1	1 2	1 1	1 2	1 1	1 2	1 1	2 2	1 1	1 2	1 2	1 2	1 1	1 2	1 2	1 1	1 1	1 1	1 1	1 2	2 2	1 2	1 2	1 2	1 1	1 1	1 1	1 2	1 2	1 2	1 1	1 2	1 2	1 2	1 2	1 2	1 2	1 2	1 2	1 1	1 1	1 2	1 1	1 2	1 2	1 1	1 1	1 2	1 1	1 2	1 2	1 2	1 1	1 2	1 2	1 2	1 2	1 1	1 2	0 0	1 2	1 1	1 2	2 2	1 1	1 1	1 1	1 1	1 2	1 1	1 2	1 2	1 1	1 2	1 1	1 2	2 2	1 1	1 1	1 2	1 2	1 2	1 2	1 1	1 2	1 2	1 2	1 1	1 2	1 2	1 2	1 2	1 2	2 2	1 2	1 1	1 1	1 1	1 1	1 1	1 2	1 2	1 1	1 1	1 2	1 1	1 2	1 2	1 2	1 1	1 2	1 2	1 2	1 2	1 1	1 2	1 1	1 2	1 1	1 2	1 1	1 2	0 0	1 2	1 2	2 2	1 2	1 2	1 1	1 2	1 2	1 2	1 1	2 2	1 1	1 2	1 2	1 1	1 2	1 2	1 2	1 1	1 1	1 2	1 1	1 2	2 2	1 2	1 2	1 1	1 1	1 2	1 2	1 1	1 2	1 1	1 2	1 2	1 1	1 1	1 1	1 2	1 1	1 1	1 2	1 2	1 1	1 2	1 2	0 0	2 2	1 1	1 2	1 2	1 2	1 1	1 1	1 2	1 1	1 1	1 2	1 1	1 2	1 1	1 2	1 2	1 2	2 2	1 2	1 2	1 2	1 1	1 1	1 2	1 1	1 2	1 2	1 1	1 2	1 1	1 2	1 1	1 2	1 2	1 2	1 2	1 1	1 2	1 1	1 1	1 2	1 2	1 1	1 2	1 1	1 1	1 1	1 1	1 1	1 2	1 2	1 1	1 1	1 2	1 1	1 2	1 1	1 2	1 2	1 2	1 1	1 2	1 2	1 1	1 1	1 2	1 1	1 2	1 2	1 1	1 2	1 2	2 2	1 2	1 1	2 2	1 2	1 1	1 2	1 2	1 2	1 1	1 2	1 1	1 1	1 1	1 2	2 2	1 1	1 2	1 1	1 2	1 2	1 2	1 2	1 1	1 1	1 2	1 2	1 2	1 2	1 1	2 2	1 1	1 1	1 1	1 1	1 1	1 2	1 2	1 2	1 1	1 1	1 1	1 2	1 1	0 0	1 1	1 1	1 2	1 1	1 2	1 2	1 1	1 1	1 2	1 2	1 2	1 2	2 2	1 1	1 2	1 2	2 2	1 1	1 1	0 0	1 2	1 1	1 1	1 2	1 1	1 2	1 1	1 1	1 2	1 1	1 1	1 2	1 1	1 1	1 2	1 1	1 2	1 1	1 2	1 1	2 2	1 2	1 2	1 2	1 1	1 2	0 0	1 1	1 2	1 2	1 2	1 2	1 2	1 1	1 1	1 1	1 2	1 2	1 1	1 2	1 1	1 2	2 2	1 2	1 1	1 1	1 2	1 1	1 2	1 1	1 2	1 2	1 2	1 1	1 1	1 1	1 1	2 2	1 2	1 1	1 2	1 1	1 2	1 2	1 1	1 2	1 1	0 0	1 1	1 1	1 1	1 2	1 1	1 1	1 1	1 1	1 1	1 1	1 2	1 1	1 2	1 2	1 1	1 2	1 2	1 2	1 2	1 2	1 2	1 1	1 1	1 2	1 2	1 2	1 2	1 1	1 2	1 1	1 1	2 2	1 1	1 1	1 1	1 2	1 2	1 2	1 2	1 1	1 1	1 1	1 1	1 1	1 2	1 2	1 1	1 2	1 1	1 2	1 2	1 1	1 2	1 1	1 2	1 2	1 1	1 1	1 2	1 2	1 1	1 1	2 2	1 2	1 2	1 1	1 2	1 2	1 2	1 1	1 2	1 2	1 1	1 1	1 2	1 2	1 2	1 1	1 2	1 1	1 2	1 2	2 2	1 2	1 2	1 2	1 2	1 1	1 2	1 1	1 2	1 2	1 1	1 2	0 0	1 2	1 1	1 1	1 1	2 2	1 2	1 2	1 1	1 1	2 2	1 1	1 1	1 2	1 1	1 1	1 2	1 1	1 2	1 2	1 2	1 2	1 1	1 1	1 1	1 2	1 2	1 1	1 2	1 1	1 1	1 1	1 1	1 2	1 2	1 1	1 1	1 1	1 1	1 1	1 2	1 2	1 2	1 2	1 1	1 1	1 1	1 2	1 2	2 2	1 2	2 2	1 1	1 1	1 2	1 1	1 2	2 2	1 2	1 1	1 2	1 1	1 1	1 1	1 2	1 1	0 0	1 1	1 2	1 2	1 2	1 1	1 2	1 2	1 2	1 2	1 1	1 2	2 2	1 2	1 1	1 1	1 2	1 2	1 2	1 1	1 2	1 2	1 2	1 1	1 2	1 1	1 1	1 2	1 2	1 2	1 2	1 2	1 2	1 1	1 2	1 2	1 2	1 2	1 2	1 2	1 2	1 1	1 2	1 2	1 2	1 1	1 1	1 2	1 1	1 2	1 1	1 2	1 2	2 2	1 1	1 2	1 2	1 1	1 2	1 2	1 2	1 1	1 1	1 2	2 2	1 1	1 1	1 2	1 1	1 1	1 2	1 1	1 2	1 2	1 1	1 1	0 0	1 1	1 2	1 2	1 2	1 2	1 1	1 2	1 1	1 2	1 2	1 2	1 2	1 1	1 2	1 1	1 2	1 2	1 2	1 1	1 1	1 1	1 2	1 2	1 2	1 2	1 1	1 1	1 2	1 2	1 2	1 1	1 1	1 2	1 2	1 1	1 2	1 2	1 2	1 2	1 2	1 2	1 2	1 1	1 2	2 2	1 2	1 1	1 2	1 1	1 2	1 1	1 2	1 2	1 2	1 1	1 2	1 2	1 1	1 2	1 1	1 2	1 2	1 1	1 1	1 2	1 2	1 2	1 1	1 2	1 1	1 1	1 2	1 1	1 2	1 2	1 2	1 1	1 1	1 1	1 1	1 2	1 1	1 1	1 2	1 2	1 1	2 2	1 1	1 1	1 2	1 1	1 2	1 2	1 1	1 2	1 2	1 1	2 2	1 1	1 2	1 2	1 2	1 2	1 2	1 2	1 2	1 2	1 1	1 2	1 1	1 1	1 1	1 2	1 1	1 1	1 1	1 1	1 2	1 2	1 2	1 1	1 2	1 2	1 1	1 2	1 2	1 2	1 1	1 2	1 2	1 2	2 2	1 2	1 1	1 1	1 2	1 1	1 2	1 2	1 2	1 2	1 2	1 2	1 2	1 2	1 2	1 1	2 2	1 2	1 1	1 2	1 1	1 2	1 1	1 2	1 1	1 2	1 2	1 1	1 2	1 2	1 1	1 1	1 1	1 2	1 2	2 2	1 2	1 2	1 2	1 2	1 2	1 2	1 1	1 2	1 1	1 2	1 2	1 1	2 2	1 2	1 1	1 1	1 2	1 1	0 0	1 1	1 2	2 2	1 1	1 1	1 1	1 2	1 2	1 1	1 2	1 2	1 2	1 1	1 1	1 1	1 1	1 2	1 1	1 2	1 1	1 1	1 2	1 2	1 2	1 1	1 2	1 1	1 1	2 2	1 1	1 2	1 2	1 1	1 2	1 1	1 2	1 2	1 2	1 1	1 1	1 2	1 2	1 2	1 1	1 2	1 2	1 2	1 2	1 1	1 2	1 2	1 2	1 2	2 2	2 2	1 2	1 2	1 1	1 2	1 2	1 2	1 2	2 2	1 2	1 2	1 1	1 1	1 1	1 2	1 1	1 1	1 2	1 2	1 2	1 2	1 2	1 1	1 2	1 1	1 2	1 1	0 0	1 2	1 1	1 2	1 1	1 2	1 2	1 2	1 2	1 2	1 1	1 1	1 2	1 1	1 2	1 1	1 2	1 2	1 2	1 2	1 2	1 2	1 1	1 2	2 2	1 2	1 2	1 2	1 2	0 0	1 2	1 2	1 2	1 1	1 2	1 2	1 1	1 1	1 1	1 2	1 2	1 1	1 2	1 1	1 2	1 1	1 2	1 2	1 2	1 2	1 1	1 2	1 2	1 2	1 1	1 2	0 0	1 1	1 2	1 1	1 2	1 2	1 1	1 1	1 2	1 1	1 2	2 2	1 1	1 2	1 1	1 2	1 1	1 1	1 2	1 2	1 2	1 1	1 2	1 1	1 2	1 1	1 1	1 1	1 2	2 2	2 2	1 1	1 1	1 1	1 2	2 2	1 1	1 1	1 2	1 1	1 1	1 2	1 2	2 2	1 1	1 2	1 1	1 2	1 2	1 2	1 1	1 1	0 0	1 2	1 2	1 1	1 2	1 2	1 1	1 1	1 1	1 2	1 2	1 2	1 1	1 1	1 1	1 2	1 1	1 1	1 2	1 2	1 2	1 2	1 2	2 2	1 1	1 1	1 2	1 2	1 2	1 1	1 2	1 2	1 2	1 2	1 1	1 1	1 1	1 1	1 1	1 1	1 2	1 2	1 1	1 1	1 1	1 2	1 2	1 2	2 2	2 2	1 1	1 1	1 1	1 1	1 2	1 1	1 2	1 2	1 2	1 2	1 1	1 1	1 1	1 2	1 2	1 2	1 1	1 1	1 1	1 2	1 2	1 1	1 1	1 2	1 2	1 1	1 2	1 1	1 2	1 1	1 2	1 2	1 2	1 2	1 2	1 1	1 1	1 1	1 2	1 2	1 2	1 2	1 1	1 1	1 2	1 1	1 1	1 2	1 2	1 2	1 2	1 2	1 2	1 2	1 1	1 2	1 1	1 2	1 2	1 2	1 2	1 1	0 0	2 2	1 2	1 2	1 1	1 2	1 1	1 1	1 1	1 1	1 2	1 2	1 2	1 2	1 2	1 2	1 2	1 2	2 2	1 2	1 1	1 2	1 1	1 2	1 2	1 2	1 1	1 2	1 1	2 2	1 1	2 2	1 2	1 2	1 1	1 2	1 1	1 2	1 2	1 2	1 2	1 1	1 2	1 2	1 2	1 1	1 2	1 2	1 2	1 1	1 1	1 2	1 1	1 2	1 2	1 2	1 1	1 1	1 2	1 2	1 2	0 0	1 2	1 1	1 2	1 2	1 2	1 2	2 2	1 2	1 1	1 2	2 2	1 2	1 2	1 2	1 2	1 2	1 1	1 2	1 2	1 1	1 2	1 2	1 2	1 1	1 2	1 2	2 2	1 2	1 1	1 1	1 1	1 2	2 2	1 2	1 2	1 2	1 2	1 2	1 2	0 0	1 2	1 2	1 2	1 2	1 1	1 1	1 2	1 2	1 1	1 1	1 1	1 1	1 2	1 2	1 2	1 2	1 1	1 1	2 2	1 2	1 2	1 2	1 1	1 2	1 1	1 1	1 2	1 2	2 2	1 1	1 2	1 2	1 2	1 1	1 1	1 2	2 2	1 1	1 1	1 1	1 1	1 1	1 1	1 2	1 1	1 1	1 1	1 2	2 2	1 2	1 1	1 1	1 1	1 2	1 2	1 2	1 2	1 1	1 2	1 2	1 1	1 2	1 2	1 1	1 2	1 1	1 2	2 2	1 2	1 2	1 1	1 2	1 1	1 2	1 2	0 0	1 2	1 1	1 2	1 1	1 1	1 2	1 2	1 2	1 2	1 2	2 2	1 2	1 1	1 2	1 2	1 2	1 1	1 2	1 2	1 1	2 2	1 1	1 2	2 2	1 1	1 1	1 2	1 2	1 1	1 1	1 2	1 2	1 1	1 1	1 1	1 2	1 2	1 2	1 1	1 2	1 2	1 2	1 2	1 2	1 1	1 1	1 2	1 2	1 2	1 2	1 2	1 2	1 1	1 2	1 2	1 1	1 2	1 2	1 2	1 2	1 2	1 2	1 2	1 2	1 2	1 2	1 2	1 2	1 2	1 1	1 1	1 2	1 1	1 2	1 2	1 1	1 2	1 2	1 1	1 2	1 2	2 2	2 2	1 1	0 0	1 2	1 2	1 1	1 2	1 1	1 2	1 2	1 1	1 2	1 2	1 2	1 2	1 2	1 2	1 1	1 1	1 2	1 2	1 2	1 1	1 1	1 2	1 2	1 1	1 1	1 2	1 2	1 2	1 2	1 2	1 1	1 2	1 1	1 1	1 2	1 1	1 1	1 2	1 1	1 1	1 2	1 1	1 2	1 1	1 2	1 1	1 2	1 1	2 2	1 2	1 1	1 1	1 1	1 2	1 1	1 2	1 1	1 1	1 1	2 2	1 2	1 2	1 2	1 1	1 1	1 2	1 1	1 2	1 2	1 2	1 2	1 2	1 1	2 2	1 1	1 2	1 2	1 1	1 2	1 2	2 2	1 2	1 2	1 1	1 1	1 2	1 1	1 1	1 2	1 2	1 1	2 2	1 2	1 2	1 1	1 2	1 2	1 2	1 1	1 1	1 2	1 2	1 1	1 2	1 2	1 2	2 2	1 2	1 2	1 2	1 2	1 2	1 1	1 2	1 2	2 2	1 2	1 2	1 1	1 2	1 1	1 2	1 2	1 1	1 1	1 1	1 1	1 1	1 1	1 2	0 0	1 1	1 2	1 2	1 2	1 2	1 1	0 0	1 1	1 1	1 2	1 2	1 1	1 1	1 2	2 2	1 1	2 2	1 2	1 1	1 2	1 1	1 1	1 2	1 2	1 2	1 2	1 2	1 1	1 1	1 2	1 1	1 1	1 2	1 2	0 0	1 1	1 1	1 1	1 1	1 2	1 1	1 2	1 2	1 2	1 1	1 2	1 2	1 2	1 1	1 2	1 1	1 1	1 2	1 1	1 2	1 2	1 1	1 2	1 1	1 2	1 1	1 2	1 2	1 2	1 2	1 1	1 1	1 2	1 1	1 2	1 2	1 2	1 1	1 1	1 1	1 2	1 2	1 2	1 1	1 2	1 2	1 1	1 1	1 2	1 1	1 2	1 1	1 2	1 2	1 2	1 1	1 2	1 2	1 1	1 1	1 2	1 2	1 2	1 1	1 2	1 1	1 2	1 1	1 2	1 2	1 2	1 2	1 2	1 2	1 1	1 2	1 1	1 1	1 2	1 1	1 2	1 1	1 2	1 2	1 1	1 2	1 2	1 2	1 2	1 2	1 2	1 2	1 2	1 2	1 1	1 2	1 2	1 2	1 2	1 1	1 1	1 1	1 2	1 2	1 2	1 2	2 2	1 2	1 2	1 1	1 1	1 2	1 2	1 2	1 1	1 2	1 1	1 1	1 2	1 2	1 2	1 2	1 1	1 2	1 1	1 2	2 2	1 1	1 1	1 2	1 2	1 2	1 2	1 1	1 1	1 2	1 1	1 2	1 2	1 1	1 2	1 2	1 2	1 1	1 1	0 0	1 1	1 2	1 1	1 1	1 1	1 1	1 2	1 1	1 1	2 2	1 2	1 2	1 2	1 1	1 1	1 2	1 2	1 1	1 1	1 1	2 2	1 1	1 2	1 1	1 2	2 2	1 2	1 2	1 2	1 1	1 2	2 2	1 2	1 2	1 2	1 1	1 1	2 2	1 2	1 1	1 1	1 2	1 2	1 2	1 2	1 2	1 2	1 2	1 2	1 2	1 2	1 2	1 1	1 1	1 2	1 2	1 2	1 1	1 2	0 0	1 2	2 2	1 1	1 2	1 1	1 2	1 2	1 2	1 1	1 1	1 1	1 2	1 2	1 1	1 2	1 2	1 2	1 2	1 1	1 1	1 2	1 2	1 2	1 2	1 2	1 1	1 1	1 2	1 1	1 1	1 2	2 2	1 1	1 1	1 2	1 1	1 1	1 2	1 2	1 1	1 2	1 2	1 1	1 1	1 1	1 1	1 1	1 2	1 1	1 2	1 1	1 2	1 1	1 2	1 2	1 1	1 2	1 1	1 1	1 1	1 1	1 2	1 2	1 1	1 1	1 1	1 2	2 2	1 2	1 1	1 2	1 2	1 2	1 1	1 2	1 1	1 1	1 2	1 1	1 1	1 2	1 1	1 1	1 1	1 2	1 1	1 2	1 2	1 1	1 1	1 1	1 1	1 2	1 2	1 1	2 2	2 2	1 2	2 2	1 1	1 2	1 1	1 2	1 2	1 1	1 2	1 2	1 1	2 2	1 2	1 1	1 2	2 2	1 2	1 1	1 1	1 1	1 2	1 1	1 1	1 2	1 2	1 2	1 2	1 2	1 2	1 1	1 2	1 1	1 2	1 1	1 2	1 2	1 1	1 1	1 1	1 2	1 1	1 2	2 2	1 1	2 2	2 2	1 1	1 1	1 2	1 1	1 2	1 1	1 2	1 2	1 2	1 1	1 1	1 1	1 1	1 2	1 2	1 2	1 2	1 1	2 2	1 2	1 1	1 2	1 1	1 1	1 1	1 2	1 2	1 2	1 2	1 2	1 1	1 2	1 1	1 1	1 1	1 2	1 1	1 2	1 1	1 1	1 2	1 2	1 2	1 2	1 2	2 2	1 2	1 2	1 2	1 1	1 2	2 2	1 2	1 2	1 1	1 1	1 1	1 1	1 1	1 2	1 2	2 2	1 2	1 2	1 2	1 2	1 2	1 2	2 2	1 2	1 2	1 1	1 2	1 2	1 2	1 2	1 2	1 2	1 2	1 1	1 2	1 1	1 2	1 2	2 2	1 1	1 2	1 1	1 2	1 1	1 2	1 2	1 2	1 2	1 2	1 1	1 2	1 1	1 1	1 2	1 2	1 1	1 2	1 1	1 2	1 2	1 2	1 2	1 2	1 1	1 1	1 1	1 2	1 2	1 2	1 1	1 1	1 1	1 1	1 1	1 1	1 2	1 2	1 1	0 0	1 1	1 2	1 2	1 2	1 1	1 2	1 2	1 2	2 2	0 0	1 2	1 1	1 1	1 2	1 2	1 2	1 1	1 2	1 1	1 2	1 1	1 1	1 1	1 1	1 1	1 2	1 2	1 1	1 1	1 2	1 2	1 1	1 1	1 2	1 1	1 2	1 2	1 2	1 1	1 2	1 2	1 1	1 1	1 2	1 1	1 2	1 2	1 2	1 1	1 1	1 1	1 2	1 1	1 2	1 2	1 2	1 2	1 2	1 1	1 1	1 1	1 1	1 1	1 2	1 2	1 2	1 1	1 2	1 2	1 1	1 2	1 1	1 2	1 2	1 2	1 2	1 1	1 2	1 1	1 2	1 2	1 1	1 2	1 2	1 2	1 2	2 2	1 1	1 2	1 1	2 2	1 2	1 2	1 1	1 2	1 2	2 2	1 2	1 2	1 2	1 2	2 2	1 1	1 2	1 1	1 2	2 2	1 1	1 1	1 1	1 2	1 2	1 1	1 2	1 1	1 2	1 2	1 1	1 1	1 2	1 2	1 1	1 2	1 1	1 2	2 2	1 1	1 2	1 2	1 2	1 2	1 2	1 1	1 2	1 2	2 2	1 1	1 2	1 2	1 2	1 1	1 2	1 1	1 2	1 2	1 2	1 1	1 2	0 0	1 1	1 1	2 2	1 2	1 1	1 1	1 2	1 1	0 0	1 1	2 2	1 2	1 2	1 1	1 2	1 1	1 2	1 2	1 2	2 2	1 1	1 2	1 2	1 2	1 1	1 1	1 2	1 1	1 2	1 2	1 2	1 1	1 2	1 1	1 2	1 2	1 1	1 1	1 2	1 2	1 2	1 1	1 2	1 1	1 1	1 2	1 1	1 1	1 1	1 2	1 2	1 1	1 2	1 2	1 1	1 2	1 2	1 2	1 1	1 2	1 1	1 2	1 2	1 2	1 2	1 1	1 2	2 2	1 2	1 2	2 2	1 1	1 2	1 2	1 2	1 2	1 2	1 2	1 1	1 2	1 2	1 2	1 1	1 1	1 2	1 2	1 2	1 2	1 2	1 1	2 2	1 1	1 2	1 2	1 1	1 2	1 1	1 1	1 1	1 2	1 2	1 1	1 2	2 2	1 2	2 2	1 2	1 2	1 2	1 1	1 1	1 1	1 2	1 2	1 2	1 1	1 1	1 2	1 2	1 2	1 2	1 2	1 1	1 2	1 1	1 2	1 2	1 2	1 2	1 1	1 2	1 2	1 1	1 2	1 1	1 2	1 1	1 2	1 1	1 2	2 2	1 2	2 2	1 1	0 0	1 2	1 2	1 1	1 2	1 1	1 2	1 2	1 1	1 1	1 2	1 1	1 2	1 2	1 1	1 2	1 2	1 1	1 2	1 1	1 2	1 1	1 2	1 1	1 1	1 2	1 2	2 2	1 2	1 1	1 2	1 2	1 1	1 2	1 2	1 2	1 1	1 2	1 1	1 2	1 1	1 1	1 1	1 2	1 1	1 1	1 1	2 2	1 1	1 1	1 2	1 2	1 2	1 2	2 2	1 1	1 2	1 2	1 2	1 1	1 1	1 2	1 2	1 2	1 2	1 1	1 2	2 2	1 1	1 1	1 1	1 2	1 2	1 2	1 2	1 2	1 1	1 1	1 2	1 1	1 2	1 2	1 2	1 2	1 2	1 1	1 2	1 2	2 2	1 2	1 1	1 1	1 1	1 2	1 1	1 1	1 2	1 2	1 2	1 1	1 1	1 1	1 2	1 1	1 1	2 2	1 1	1 2	2 2	1 2	1 1	1 2	1 2	1 2	1 1	1 1	1 2	1 1	0 0	1 2	1 1	1 2	1 2	1 2	1 2	1 2	1 2	1 2	1 2	2 2	1 2	1 1	1 2	1 1	1 1	1 1	1 2	1 2	1 1	1 2	1 2	1 2	2 2	1 1	1 2	1 1	1 1	1 2	1 1	1 2	1 1	1 1	1 2	1 1	1 1	1 2	1 1	1 2	1 2	1 1	1 2	1 1	1 1	1 1	1 1	1 2	1 2	1 1	1 2	1 2	1 1	1 2	1 2	1 1	1 1	1 1	1 1	1 2	1 1	1 2	1 2	1 2	1 1	1 2	1 2	1 2	1 1	1 1	1 2	1 2	1 1	1 2	1 1	2 2	1 2	1 1	1 2	1 2	1 2	1 2	1 2	1 2	1 1	2 2	1 2	1 2	1 1	1 1	1 1	1 1	1 2	1 2	2 2	1 1	1 2	1 1	1 2	1 1	1 2	1 2	2 2	1 2	1 2	1 2	1 2	1 1	1 2	1 2	1 1	1 1	1 1	1 2	1 2	1 1	1 2	1 2	1 2	1 2	1 1	1 1	1 1	1 1	1 1	1 2	1 2	1 2	1 1	1 2	2 2	1 1	2 2	1 2	1 1	1 2	1 1	1 2	1 2	1 1	1 2	1 1	1 2	1 2	1 1	1 1	1 1	1 2	1 2	1 2	1 2	1 1	1 2	1 1	1 2	1 1	1 2	1 2	1 2	1 2	1 2	1 2	1 2	1 1	1 1	1 1	1 2	1 2	1 2	2 2	2 2	1 1	1 2	1 2	1 2	1 1	1 1	1 1	1 2	1 1	1 2	1 2	1 1	1 1	1 2	1 1	1 1	1 2	1 2	2 2	1 2	1 2	1 2	1 1	1 2	1 1	1 2	1 1	1 2	1 2	1 2	1 2	1 2	1 1	1 1	1 2	1 1	1 2	1 2	2 2	1 2	1 1	1 2	1 2	1 1	1 2	1 1	1 1	1 2	1 1	1 1	1 1	1 1	1 1	1 2	1 2	1 2	1 2	1 2	1 2	1 2	1 2	1 2	1 2	1 2	1 2	1 1	1 2	1 2	1 2	1 2	1 1	1 1	1 2	1 1	1 2	1 2	1 2	2 2	1 1	1 2	0 0	1 2	1 1	1 2	1 1	1 2	1 1	1 2	1 2	1 2	1 1	1 2	1 1	1 1	1 2	1 1	1 2	1 2	1 1	1 2	1 1	1 1	1 1	1 2	1 1	1 2	1 1	1 1	2 2	1 2	1 2	2 2	1 2	1 2	1 2	1 2	1 1	2 2	1 2	1 1	1 1	1 2	1 2	1 1	1 1	1 2	1 1	1 1	1 1	1 2	1 1	1 2	1 2	1 1	2 2	1 1	1 2	2 2	1 1	1 1	1 2	2 2	1 1	1 2	1 2	1 1	1 2	1 2	1 2	1 1	1 2	1 1	1 2	1 2	1 2	1 2	1 1	1 1	1 1	1 2	1 2	1 2	2 2	1 1	1 1	1 2	1 2	1 1	1 2	1 2	1 2	1 1	1 1	1 2	1 1	1 1	1 1	1 2	1 2	1 2	1 2	1 1	1 2	1 1	1 1	1 2	1 1	1 2	1 1	1 2	1 1	2 2	1 1	1 1	1 2	1 1	1 1	1 2	1 2	2 2	2 2	1 2	1 2	1 1	1 1	1 2	1 2	1 2	1 1	1 2	1 2	1 1	1 1	1 2	1 2	1 1	1 2	1 1	1 2	1 1	1 2	1 2	1 1	1 1	1 1	1 2	1 2	1 1	1 2	1 2	1 1	1 2	1 1	1 2	2 2	1 2	1 2	1 1	1 2	1 1	1 2	1 2	1 2	1 2	1 2	1 2	1 2	1 2	1 1	1 2	1 1	1 2	1 2	1 2	1 2	1 2	1 2	1 1	1 2	1 1	1 2	1 1	1 1	1 2	1 1	1 2	2 2	1 2	1 1	1 1	1 2	1 1	1 1	1 1	1 2	1 2	1 2	1 2	1 2	1 1	1 2	1 1	1 1	1 2	1 1	1 1	1 1	1 2	1 1	1 2	1 2	1 1	1 2	1 2	1 2	2 2	1 2	1 2	1 1	1 1	1 2	1 1	1 2	1 2	1 1	1 1	1 1	1 1	1 2	1 2	1 1	1 2	1 2	0 0	1 1	2 2	1 2	0 0	1 2	1 2	1 1	1 1	1 1	1 2	1 1	1 2	1 1	1 2	1 2	1 2	1 2	1 1	1 2	1 1	1 2	1 2	1 2	1 2	1 1	1 1	2 2	1 1	1 1	1 1	1 2	1 1	1 1	1 2	1 2	1 1	1 2	1 2	1 2	1 2	1 2	1 2	1 1	2 2	1 2	1 2	1 1	1 2	1 1	1 2	1 2	1 2	1 2	1 2	1 1	1 2	1 2	1 2	1 1	1 1	1 2	1 1	1 2	1 2	1 2	1 1	1 1	1 2	1 2	1 2	1 1	1 2	1 2	1 2	1 2	1 1	1 2	1 1	2 2	1 2	1 1	0 0	1 1	1 1	1 2	1 1	1 2	1 2	1 2	1 1	1 2	1 1	1 2	1 1	1 2	1 1	1 2	1 1	2 2	1 2	1 2	1 2	1 1	1 1	1 1	1 1	1 1	1 1	1 2	1 1	1 1	1 2	1 2	1 1	1 2	1 1	1 2	1 1	1 1	1 1	1 2	1 2	1 2	1 1	1 2	1 2	1 2	1 1	1 2	1 1	1 2	1 2	1 1	2 2	1 2	1 2	1 1	1 1	1 2	1 2	1 2	1 2	1 1	1 1	1 2	1 2	0 0	1 2	1 1	1 2	1 2	1 2	1 2	1 2	1 1	1 1	1 1	1 1	1 2	1 2	1 2	1 2	1 2	1 2	1 2	1 1	1 2	1 2	1 1	1 2	1 2	1 1	1 1	1 2	1 2	1 2	1 1	2 2	1 1	1 2	1 2	1 2	1 1	1 2	1 2	1 2	2 2	1 2	1 1	1 2	1 1	1 2	1 1	1 2	1 2	1 2	1 1	1 2	1 2	1 1	1 2	1 2	1 1	1 2	1 1	1 1	1 1	1 2	1 1	2 2	1 1	1 2	1 2	1 2	1 1	1 2	2 2	1 2	1 1	1 2	1 2	1 1	1 2	1 1	1 2	1 1	1 2	1 1	1 1	2 2	1 1	1 2	1 1	1 1	1 2	1 1	1 2	1 2	1 1	2 2	1 1	1 1	1 2	1 1	1 1	1 2	1 2	1 2	1 1	1 1	1 2	2 2	1 2	1 1	1 1	1 1	2 2	1 2	1 2	1 2	1 2	1 2	1 2	1 2	1 1	1 1	1 1	1 1	1 2	1 1	1 2	1 2	1 2	1 1	1 1	1 2	1 2	1 1	1 1	1 1	1 2	1 1	1 2	2 2	1 2	1 1	1 2	1 2	1 2	1 1	1 1	1 2	1 1	1 2	2 2	1 2	1 1	1 1	1 2	1 1	1 2	1 1	1 2	1 1	1 2	1 2	1 2	1 2	1 2	1 2	1 2	1 1	1 2	1 2	1 1	1 2	0 0	1 2	1 2	1 2	1 2	1 1	1 1	1 1	1 1	1 1	1 1	1 2	1 2	1 1	2 2	1 1	1 1	1 1	2 2	1 1	1 2	1 2	1 2	1 1	2 2	0 0	1 2	1 2	1 1	1 2	1 1	1 2	1 1	1 1	1 2	1 1	1 2	1 2	1 2	1 2	1 1	1 1	1 2	1 1	1 1	1 2	1 1	1 1	1 1	1 2	1 1	1 2	1 1	1 2	1 2	1 1	1 2	2 2	1 2	1 1	1 2	1 2	1 2	1 1	1 1	1 1	1 1	1 2	1 2	1 1	1 2	1 2	1 2	1 1	1 2	1 1	1 2	1 1	1 2	1 1	1 1	1 2	1 2	1 1	1 1	1 2	1 1	1 2	1 1	1 2	1 2	1 2	1 2	2 2	2 2	1 2	1 1	1 2	1 1	1 2	1 2	1 1	1 1	1 1	1 2	1 2	1 1	1 1	1 1	1 2	1 2	1 2	1 1	1 2	1 2	1 2	1 1	1 1	1 2	2 2	1 2	1 2	1 2	1 1	1 1	1 2	1 2	1 2	1 1	1 2	1 2	1 2	1 2	1 2	2 2	1 2	1 1	1 1	1 2	1 2	1 1	1 2	1 1	1 1	1 2	1 1	1 2	1 1	1 1	1 2	1 1	1 1	1 1	1 2	1 1	1 2	1 2	1 2	1 1	1 2	1 2	1 2	1 2	1 1	1 1	1 2	1 2	1 1	1 2	1 1	1 1	1 1	1 1	1 1	1 2	1 2	1 2	0 0	1 2	1 1	1 1	1 2	1 1	2 2	1 1	2 2	1 2	1 2	1 2	1 2	2 2	1 2	1 2	1 1	1 1	1 2	1 1	1 2	1 2	1 1	1 2	1 1	1 1	1 1	1 2	1 2	1 1	1 1	1 2	1 2	1 2	1 2	1 2	2 2	1 2	1 2	1 2	1 2	1 1	1 2	1 2	1 2	1 1	1 2	1 2	1 1	1 2	1 2	1 2	1 2	1 2	1 1	1 1	1 1	1 1	1 2	1 1	1 1	1 2	1 2	1 1	1 2	2 2	1 2	1 1	1 2	1 1	1 2	1 2	1 1	1 2	2 2	1 2	1 2	1 1	1 2	1 2	1 2	1 1	1 2	1 2	1 1	1 2	1 2	1 1	1 1	1 2	2 2	1 2	1 1	1 2	1 2	1 2	1 2	1 2	1 2	2 2	1 1	1 2	1 2	1 1	1 2	1 1	1 1	1 2	1 1	1 2	1 2	1 1	1 2	1 2	1 2	1 1	1 2	1 2	1 2	1 1	1 1	0 0	1 1	1 2	1 2	1 2	1 2	1 2	1 1	1 2	1 1	1 1	1 2	1 2	2 2	1 2	1 1	1 2	1 1	1 1	1 2	1 1	1 2	1 2	2 2	1 2	2 2	1 2	1 2	1 1	1 1	1 2	1 2	1 1	1 2	1 2	1 2	1 1	1 2	1 2	1 2	1 2	0 0	1 1	1 2	1 1	1 2	1 2	1 1	1 1	1 1	1 2	1 1	1 1	1 1	1 1	1 2	1 1	1 1	1 2	1 2	1 2	1 2	1 1	1 2	1 2	1 2	1 2	1 2	1 2	1 2	1 2	1 2	1 2	1 1	1 1	1 2	1 2	1 1	1 1	1 2	1 2	1 1	2 2	1 2	1 1	1 2	1 2	1 2	1 1	1 2	1 2	1 2	1 2	1 2	1 2	1 1	1 2	1 1	1 2	2 2	1 1	1 1	1 1	1 1	1 1	1 2	1 2	1 2	1 1	1 1	1 2	1 2	1 1	1 1	1 2	1 1	1 2	1 2	1 1	1 2	1 2	1 2	1 2	1 1	1 1	1 2	0 0	1 1	1 1	1 1	1 2	1 2	1 1	1 2	1 1	1 1	1 2	1 2	1 2	1 2	1 2	1 1	1 1	1 1	1 1	1 1	1 1	0 0	1 2	1 2	1 2	1 1	1 1	1 2	1 1	1 2	1 2	1 1	1 2	1 2	1 2	1 2	1 2	1 1	1 1	1 2	1 2	1 2	1 2	1 2	1 2	1 1	1 1	1 2	1 1	1 2	1 2	1 1	1 2	2 2	1 2	1 2	1 1	1 1	1 2	1 2	1 2	2 2	1 1	1 1	1 2	2 2	1 2	1 2	1 1	1 2	1 2	1 2	1 1	1 2	1 2	1 2	1 2	1 1	2 2	1 2	1 2	1 1	1 2	1 2	1 1	1 1	1 2	1 2	1 2	1 2	1 2	1 2	1 2	1 2	1 1	1 2	1 1	1 2	1 2	1 2	1 2	1 1	1 1	1 1	1 2	1 2	1 2	1 2	1 2	1 2	1 1	1 1	1 2	1 2	1 1	1 2	2 2	1 1	1 2	1 2	1 1	1 2	1 1	1 1	1 2	1 1	1 2	2 2	1 2	0 0	1 1	1 1	1 2	1 1	1 1	1 2	1 1	1 2	1 2	1 2	1 2	1 2	2 2	1 2	1 1	1 2	1 2	1 2	1 1	1 1	1 2	1 2	1 1	2 2	1 2	1 2	1 2	1 1	2 2	1 1	1 2	1 1	1 2	2 2	1 1	1 1	1 2	1 2	1 2	1 1	1 1	1 1	1 1	1 1	1 2	1 1	1 1	1 1	1 1	1 2	1 1	1 1	1 2	1 2	1 2	1 1	1 2	1 1	1 2	1 2	2 2	1 1	1 2	0 0	1 1	1 1	1 2	1 1	1 2	1 1	1 1	1 1	1 1	1 1	1 2	1 2	1 1	1 1	1 2	1 2	1 2	1 1	1 2	1 1	1 2	1 2	1 1	1 2	1 2	1 1	1 2	1 2	1 1	1 1	1 1	1 1	1 2	1 2	1 2	1 1	1 2	1 2	1 2	1 1	1 1	1 1	1 2	1 2	1 2	1 2	1 1	1 2	1 2	1 2	1 1	1 1	1 1	1 2	2 2	1 2	1 1	1 2	1 2	1 1	1 1	1 2	1 2	1 1	1 2	1 1	1 1	1 1	1 2	1 1	1 2	1 2	1 2	1 1	1 2	1 1	1 1	1 2	1 2	1 1	1 1	1 2	1 1	1 2	1 2	1 2	1 2	1 1	1 1	1 2	1 2	1 1	1 2	1 1	1 2	1 1	1 2	1 2	1 2	2 2	1 1	1 2	1 2	1 1	1 1	1 2	1 2	1 1	1 2	1 1	1 1	1 2	1 1	1 2	1 2	1 2	1 1	1 1	1 1	1 2	1 1	1 2	1 2	1 2	1 1	1 2	1 2	1 2	1 2	1 1	1 2	1 2	1 2	1 2	1 1	1 1	1 1	1 2	1 2	1 2	0 0
1	009.x1.GQI119	800.x1.GQI122	400.x1.GQI122	0	0	1 2	2 2	1 1	1 2	1 2	1 1	1 1	1 2	1 1	2 2	1 2	1 2	1 1	1 2	1 1	1 2	1 2	1 2	1 2	1 2	1 1	1 2	1 2	2 2	1 1	1 1	1 2	1 1	1 2	1 1	1 1	0 0	2 2	1 2	1 1	2 2	1 1	1 2	1 2	1 2	1 2	1 2	2 2	1 1	1 1	1 1	1 1	1 2	1 2	1 2	1 2	1 2	1 2	1 2	1 2	1 1	2 2	1 1	1 1	1 2	1 2	1 2	1 2	1 2	1 1	1 1	1 2	1 1	1 1	1 2	1 2	1 2	1 1	2 2	1 2	1 2	1 2	1 2	1 2	1 2	1 2	2 2	1 1	1 2	1 2	1 2	1 1	2 2	1 2	1 2	1 1	1 2	1 1	1 2	1 1	2 2	1 2	2 2	1 1	2 2	1 2	1 1	1 2	1 1	1 1	1 1	1 2	1 2	1 2	1 2	1 2	1 1	1 1	1 2	1 2	1 1	1 2	1 1	1 2	1 1	1 1	1 2	1 1	1 1	1 1	1 1	1 1	1 2	1 2	1 2	1 2	1 2	1 1	2 2	1 1	2 2	1 1	1 1	1 1	1 1	1 1	1 2	1 2	1 2	1 1	1 1	1 2	1 1	1 1	1 1	1 2	1 2	1 2	1 2	1 1	1 2	1 1	1 1	1 1	1 2	1 1	1 2	1 1	1 1	1 2	1 1	1 1	1 1	1 2	1 1	1 1	0 0	2 2	1 1	2 2	2 2	1 2	1 2	1 2	1 1	1 2	1 2	1 1	1 2	1 2	2 2	2 2	1 2	2 2	1 2	1 1	1 1	1 2	1 1	1 1	0 0	2 2	1 1	1 1	1 1	1 2	1 2	1 1	2 2	1 1	1 2	1 1	1 2	1 2	1 1	1 1	1 2	1 2	1 1	1 1	1 2	1 2	1 2	1 1	1 2	1 1	1 1	1 1	1 2	1 2	1 2	1 1	1 1	1 2	1 2	1 1	1 2	1 1	1 2	1 1	1 1	1 2	1 1	1 2	1 2	1 2	1 1	1 1	1 2	1 1	1 1	1 2	1 1	1 2	1 2	1 1	1 1	1 1	1 2	1 2	1 1	1 2	1 2	1 1	1 1	1 2	1 1	1 2	1 1	1 1	0 0	1 2	0 0	1 2	1 1	1 2	1 1	1 1	1 1	1 2	1 1	1 2	1 1	1 2	1 1	1 2	1 1	1 2	1 2	2 2	1 1	1 1	1 1	1 1	1 2	1 1	1 1	1 1	1 2	1 1	1 1	1 2	1 2	1 2	1 2	1 1	1 1	1 2	1 2	1 1	1 1	1 1	1 1	1 1	1 2	1 2	1 2	1 1	2 2	2 2	1 1	1 1	1 2	1 1	1 1	2 2	1 2	1 2	1 1	1 2	1 2	2 2	1 1	1 2	1 1	1 2	1 2	1 1	1 1	1 2	1 2	1 1	1 2	2 2	1 1	1 2	1 2	1 2	1 1	1 2	1 2	1 2	1 2	1 1	1 2	1 1	1 2	1 1	1 1	0 0	1 1	1 2	1 1	1 1	1 2	1 2	1 1	1 1	1 1	1 1	1 2	1 2	1 2	1 1	1 1	1 1	1 1	1 2	1 2	1 1	1 2	2 2	1 2	1 1	0 0	1 1	1 1	1 2	1 2	2 2	1 1	1 1	1 1	1 1	1 1	1 2	1 1	1 1	1 1	1 2	1 2	1 1	1 2	1 2	1 1	1 1	1 2	1 1	1 2	1 2	1 2	1 1	1 1	1 2	1 2	1 2	1 1	1 2	1 1	1 2	1 1	1 1	1 1	1 2	2 2	1 2	1 1	1 2	1 1	1 1	1 2	1 1	1 2	1 2	1 2	1 1	1 2	1 2	1 2	1 1	1 1	1 2	1 2	1 1	1 1	1 2	2 2	1 1	1 1	1 2	1 2	1 2	1 2	1 1	1 2	1 2	1 2	1 1	0 0	1 1	1 2	1 1	1 2	1 1	1 2	1 2	1 2	1 2	1 2	1 2	1 1	1 1	2 2	1 1	1 2	1 1	1 1	1 2	1 2	1 2	1 1	1 2	2 2	1 1	1 1	1 2	1 2	1 2	2 2	1 2	1 2	1 2	1 1	1 1	1 1	1 2	1 1	1 2	1 2	1 1	1 2	1 1	1 2	1 1	1 2	1 2	1 2	1 1	1 2	1 1	1 1	1 1	1 1	1 1	1 2	1 2	1 1	1 1	2 2	0 0	1 1	1 2	1 2	1 2	1 1	1 1	1 1	1 2	1 1	1 2	1 1	1 1	2 2	1 1	1 2	1 1	1 2	1 2	0 0	1 2	1 2	1 1	1 1	1 2	1 1	1 2	1 1	1 2	1 1	1 2	2 2	1 1	1 1	1 1	1 1	1 2	1 1	1 2	1 1	1 2	1 1	1 1	1 2	1 2	1 1	1 1	1 2	1 2	1 1	1 1	1 1	1 2	1 1	1 2	1 1	2 2	0 0	1 2	2 2	1 1	1 1	2 2	1 2	1 1	1 1	1 1	1 2	1 2	1 1	1 1	1 1	1 1	1 2	1 2	1 2	2 2	1 2	1 1	1 2	1 1	1 2	1 2	1 2	1 1	2 2	1 2	1 2	1 2	1 2	1 2	1 2	1 1	1 1	1 1	1 1	1 2	1 2	1 1	1 1	1 2	0 0	1 2	1 2	1 2	1 1	2 2	1 1	1 1	1 2	1 1	1 1	1 1	1 2	1 1	2 2	1 2	1 1	2 2	1 1	1 1	1 2	1 2	1 1	2 2	1 1	0 0	0 0	1 2	1 2	2 2	1 2	1 1	1 2	0 0	1 2	1 1	1 1	1 1	1 1	1 1	1 1	1 1	1 1	1 2	1 2	1 1	1 2	1 2	1 1	1 2	1 2	1 1	1 1	1 1	1 1	1 1	1 2	1 2	1 2	1 1	1 2	1 2	1 2	1 2	1 1	1 2	1 2	1 2	1 2	1 2	1 2	1 2	2 2	1 1	2 2	1 2	2 2	1 2	1 2	2 2	1 2	1 2	1 2	1 2	1 2	1 2	1 2	1 1	1 2	1 2	1 2	1 1	1 2	1 2	1 1	1 2	1 1	1 2	1 2	1 1	1 2	1 2	1 2	1 1	1 2	1 2	1 2	1 1	1 2	1 1	1 1	1 1	1 2	1 2	1 1	1 2	1 2	1 1	1 1	1 2	1 1	1 2	1 2	1 1	1 1	1 1	1 2	1 1	1 1	1 1	1 2	2 2	1 2	1 2	0 0	1 1	1 2	1 1	1 2	1 2	1 1	1 2	2 2	1 2	1 1	1 2	2 2	1 1	1 2	1 2	1 2	1 2	1 1	1 1	1 1	2 2	1 2	1 2	1 1	2 2	1 1	1 2	2 2	1 2	1 2	1 1	1 1	1 2	1 1	1 2	1 1	1 1	1 2	1 2	1 1	1 2	1 2	1 2	1 2	1 2	1 2	1 1	2 2	2 2	1 1	1 1	1 1	1 1	1 2	1 2	1 2	1 2	1 1	1 2	1 1	1 1	1 2	1 2	1 2	1 2	1 2	1 1	2 2	1 1	2 2	1 1	1 2	1 2	1 1	1 2	1 2	1 1	1 1	0 0	1 2	1 2	1 2	1 2	1 2	1 2	1 1	2 2	1 1	1 2	1 1	1 1	1 2	1 2	0 0	1 2	1 2	1 2	1 2	1 1	1 1	1 1	1 2	1 1	1 1	2 2	1 1	1 2	1 1	1 1	1 2	1 1	1 1	1 2	1 1	1 1	1 2	1 1	1 1	1 1	1 2	2 2	1 1	1 1	1 2	2 2	2 2	1 1	1 2	1 2	2 2	1 2	1 2	2 2	1 2	1 2	1 1	1 2	1 2	1 1	1 1	1 1	1 1	1 1	1 2	1 2	1 2	1 2	1 2	1 1	1 1	1 2	1 2	1 2	1 2	1 2	1 2	1 2	1 2	1 2	1 2	1 2	1 1	1 1	1 2	2 2	1 1	1 1	1 2	1 1	1 2	1 1	1 1	1 2	1 1	1 2	2 2	1 2	1 2	1 2	1 2	1 1	2 2	1 1	1 2	1 1	2 2	1 1	1 1	1 1	1 1	1 2	1 2	1 2	1 2	1 1	0 0	1 2	1 1	1 2	1 1	1 1	1 2	2 2	1 1	1 2	1 1	1 1	1 2	1 2	1 1	1 2	1 1	1 1	1 1	1 1	1 1	1 1	1 2	1 2	1 2	1 1	1 2	1 1	2 2	1 2	1 2	1 2	1 2	1 2	1 2	1 2	1 1	1 2	1 1	1 2	1 1	1 2	1 2	1 2	1 1	1 2	1 1	1 1	2 2	1 1	1 2	1 1	1 2	1 2	1 1	1 2	1 2	1 2	1 2	1 2	1 1	1 2	1 2	1 2	1 2	1 1	1 2	1 2	2 2	2 2	2 2	1 2	1 1	2 2	1 1	2 2	1 1	1 2	1 1	1 2	1 1	1 2	1 2	1 1	1 1	1 1	1 2	1 1	1 1	2 2	1 2	1 2	1 1	1 2	1 2	1 2	1 1	1 1	1 1	1 1	1 1	2 2	1 1	1 2	1 1	1 2	1 1	1 1	1 1	1 2	1 1	1 1	1 1	1 2	1 1	1 1	1 1	1 1	1 1	1 2	1 2	1 1	1 2	1 2	1 1	1 1	1 2	1 1	1 2	1 2	1 1	1 1	1 2	1 2	1 2	1 2	1 2	1 2	2 2	1 1	2 2	1 2	2 2	1 1	1 2	1 2	1 1	1 1	1 1	1 1	1 2	1 2	1 1	1 1	1 1	1 2	1 1	1 1	1 2	1 1	1 2	1 1	1 1	1 2	1 2	1 1	1 2	1 1	1 2	1 2	1 2	1 1	1 1	1 2	1 1	1 1	1 1	1 1	1 1	1 2	1 1	1 2	1 2	1 2	1 2	2 2	1 1	1 2	1 1	1 1	1 1	1 1	1 2	1 1	1 2	1 1	1 1	2 2	1 2	1 1	1 1	1 1	1 1	1 1	1 2	1 2	1 1	2 2	1 2	1 1	1 2	1 1	1 2	1 2	1 2	1 2	1 2	1 1	1 1	1 2	1 1	1 2	1 2	1 2	2 2	1 1	1 2	1 1	1 1	1 1	1 2	2 2	1 2	1 1	1 2	1 2	2 2	0 0	1 1	1 2	1 2	1 2	1 2	2 2	1 1	1 2	1 1	2 2	2 2	1 2	1 2	1 1	2 2	1 1	1 2	1 1	1 2	1 2	1 2	1 1	1 2	1 2	1 1	1 1	1 2	1 2	1 2	1 2	1 2	1 2	1 1	1 1	1 1	1 1	1 1	1 1	1 1	1 1	1 1	1 1	1 2	1 2	1 2	1 2	1 1	1 1	1 1	1 2	1 1	1 1	1 2	0 0	1 1	1 1	1 2	1 2	1 1	1 1	1 2	1 2	1 2	1 1	1 1	1 1	1 2	2 2	1 2	1 2	1 2	1 2	1 1	1 2	1 1	1 2	1 2	2 2	1 2	0 0	1 2	1 1	1 2	1 2	1 2	1 2	0 0	1 2	1 1	2 2	1 2	2 2	1 1	1 2	1 1	1 2	1 2	1 1	1 2	1 2	1 2	1 2	2 2	1 2	1 1	1 2	1 2	1 1	1 2	1 2	1 1	1 1	1 2	1 1	1 2	1 1	1 1	1 2	1 1	1 1	1 2	1 2	1 2	1 2	1 2	1 1	1 1	1 1	1 1	1 2	1 1	1 2	1 1	1 1	1 1	1 2	1 1	1 2	1 1	1 2	1 1	1 2	1 1	1 2	2 2	1 1	1 1	1 2	1 2	1 2	2 2	1 2	1 2	1 2	1 2	1 2	2 2	1 2	1 2	2 2	2 2	1 2	1 2	2 2	1 2	1 2	2 2	1 1	1 1	1 2	2 2	1 1	1 1	2 2	2 2	1 1	1 1	1 1	1 2	1 1	1 1	1 1	1 1	1 2	1 1	1 2	1 1	1 1	1 1	1 2	1 2	1 2	1 2	1 2	1 1	1 2	1 1	2 2	1 1	1 2	1 2	1 2	1 2	1 2	1 2	1 1	1 2	1 2	1 2	2 2	1 2	1 1	2 2	1 2	1 2	2 2	1 2	1 2	1 1	1 1	1 1	1 2	1 2	1 1	1 2	1 1	1 2	1 2	1 1	1 2	1 1	1 1	2 2	1 2	1 1	2 2	1 2	1 1	1 1	1 2	1 2	1 1	1 1	1 2	1 2	1 1	1 2	1 2	1 2	1 1	1 2	0 0	1 1	2 2	1 1	1 2	1 2	1 2	1 2	1 2	1 1	1 2	1 2	1 1	1 1	1 2	1 2	1 1	1 2	1 1	1 1	1 1	1 1	1 1	1 2	1 2	1 2	1 2	1 1	1 2	1 1	1 2	1 1	1 1	1 1	1 2	1 1	1 2	1 2	1 2	1 1	1 2	0 0	1 1	2 2	1 2	1 1	1 1	1 1	0 0	1 1	1 2	1 1	1 1	1 1	2 2	1 1	0 0	1 2	1 1	1 1	2 2	1 1	1 1	1 1	1 2	1 1	1 2	1 2	2 2	1 1	1 1	1 1	1 2	1 1	1 2	1 2	1 2	1 2	1 2	1 1	1 1	1 1	1 1	2 2	1 2	1 2	1 2	1 1	1 2	1 1	1 1	1 2	1 1	1 2	1 2	1 2	1 2	1 2	1 2	1 2	1 1	1 2	1 1	1 1	1 1	1 1	1 1	1 1	2 2	2 2	1 2	1 2	1 2	1 1	1 1	1 2	1 1	1 2	1 1	1 2	2 2	2 2	1 2	1 2	1 2	1 1	1 2	1 2	1 2	1 1	1 2	1 2	1 2	1 2	1 2	1 2	1 2	1 1	1 2	1 1	1 1	1 2	1 1	1 2	1 1	1 2	1 2	1 2	1 2	1 2	1 1	1 2	1 2	1 2	1 2	1 2	1 1	2 2	1 1	1 2	1 2	1 2	2 2	1 1	1 1	1 1	1 2	1 2	1 2	1 1	2 2	1 2	2 2	1 1	1 1	1 1	1 1	2 2	1 1	1 1	0 0	1 1	1 1	1 2	1 2	1 2	1 1	1 2	1 2	1 1	1 2	1 1	1 2	1 2	1 1	1 2	1 2	1 2	1 2	1 2	1 2	1 2	1 2	1 2	1 2	1 1	1 2	1 2	1 1	1 2	1 1	1 2	1 2	1 1	1 2	2 2	1 1	1 2	1 1	1 2	1 1	1 1	1 2	1 2	2 2	1 1	1 1	1 2	1 1	2 2	1 1	1 2	1 1	1 1	2 2	1 1	1 1	1 1	2 2	1 2	1 1	1 2	1 1	1 2	1 1	1 1	1 1	0 0	1 2	1 1	1 1	1 1	1 2	1 2	2 2	1 1	1 1	1 1	1 1	1 1	1 1	1 1	1 1	2 2	1 2	1 2	1 2	1 2	1 2	1 1	1 1	2 2	2 2	1 2	1 2	2 2	1 2	1 2	1 2	1 2	1 1	1 2	1 1	1 1	1 1	1 1	1 1	1 2	1 2	1 1	1 2	1 1	2 2	1 1	1 1	1 1	1 2	1 1	1 2	1 1	1 2	1 1	1 2	1 1	1 2	1 1	1 2	1 1	1 2	1 2	1 2	1 1	1 2	1 2	1 1	1 1	2 2	1 1	1 1	1 1	1 2	1 1	1 2	1 2	1 2	1 2	1 2	1 2	1 1	1 1	1 2	1 1	1 2	2 2	1 2	1 1	1 2	1 2	1 2	2 2	1 2	1 2	1 2	1 1	2 2	1 2	2 2	1 2	1 2	1 1	1 2	1 2	1 2	1 1	2 2	2 2	2 2	1 2	1 2	1 1	1 2	1 1	1 2	1 1	1 2	1 1	1 2	1 2	1 1	1 2	1 2	1 2	1 1	1 1	1 2	1 1	1 1	1 2	1 2	2 2	1 1	1 1	1 2	1 1	1 2	1 2	1 1	1 1	1 1	1 2	1 2	1 2	1 1	1 1	1 2	1 1	2 2	1 2	1 1	1 1	1 1	1 1	1 2	0 0	1 2	2 2	2 2	1 2	1 2	1 2	1 2	1 2	1 2	1 1	1 2	1 2	1 2	2 2	1 1	1 1	1 2	1 1	1 1	1 1	1 2	1 1	1 2	1 2	1 1	1 1	1 2	1 2	1 2	1 1	1 1	1 2	1 2	2 2	1 2	1 1	1 2	1 2	2 2	1 1	1 1	1 2	1 2	1 2	1 1	1 1	1 2	1 1	1 2	2 2	2 2	1 2	2 2	2 2	1 1	1 2	1 2	1 2	1 2	1 2	1 2	2 2	1 1	1 1	1 2	1 1	1 2	1 2	1 2	1 1	1 1	1 2	1 2	1 1	1 2	1 1	1 2	1 1	1 1	1 1	1 1	1 1	1 1	1 1	1 1	1 2	1 1	1 1	1 2	1 1	1 2	1 2	1 2	1 1	1 1	1 2	1 1	1 2	1 1	0 0	1 1	2 2	2 2	1 2	2 2	1 2	1 2	1 2	1 1	1 1	1 1	1 1	1 2	1 2	1 1	1 2	1 1	1 2	1 1	1 2	1 2	1 1	1 2	1 2	0 0	1 2	1 2	1 2	1 2	1 2	1 2	1 2	1 2	1 2	1 2	1 2	1 1	1 1	1 1	1 1	1 1	1 1	1 1	1 2	2 2	1 1	1 1	1 2	1 1	1 1	1 1	1 1	1 2	1 1	1 2	1 1	1 1	1 1	1 2	1 1	1 1	1 1	1 1	1 2	2 2	1 2	2 2	1 1	1 1	1 1	1 1	1 2	1 1	1 2	1 1	1 1	2 2	1 1	1 2	2 2	1 2	1 2	2 2	1 1	1 1	1 2	1 1	1 1	1 2	1 2	1 2	1 2	1 2	1 1	1 2	1 2	1 1	2 2	1 1	1 1	1 1	2 2	1 2	1 2	1 1	1 2	1 2	1 1	1 2	1 1	1 1	1 2	1 2	1 2	1 2	1 1	1 1	1 1	1 2	2 2	1 1	1 2	1 1	1 1	2 2	1 2	1 1	1 1	1 1	1 1	1 1	1 1	1 2	2 2	1 1	1 1	1 1	1 1	1 1	1 2	1 2	1 1	1 2	1 2	1 1	1 2	1 2	1 2	1 2	1 2	1 2	1 1	1 1	1 2	1 1	1 2	1 2	1 2	1 2	1 1	1 2	1 2	1 2	1 1	1 2	1 2	1 1	1 1	1 2	1 1	2 2	1 2	1 2	1 1	1 2	1 2	1 2	1 2	1 2	1 2	1 1	1 1	1 1	1 1	1 2	1 1	1 1	1 1	1 2	1 1	1 1	1 2	1 2	1 2	1 2	1 1	1 1	1 2	2 2	1 2	1 2	1 2	1 2	1 1	1 1	1 1	1 2	1 1	1 1	2 2	1 1	2 2	1 1	1 1	2 2	1 1	1 2	1 1	1 2	1 1	1 1	1 2	1 1	1 1	1 2	1 1	1 2	1 1	1 1	1 1	1 1	1 1	1 2	1 2	1 1	1 1	1 1	1 2	1 2	1 2	2 2	1 1	1 2	1 1	1 2	1 1	1 2	1 1	1 1	1 2	2 2	1 2	1 1	1 1	1 2	1 2	1 2	1 1	1 1	1 2	2 2	1 2	1 2	1 2	1 1	1 2	1 2	1 1	1 1	0 0	1 2	1 1	1 1	1 2	1 2	1 2	1 1	1 2	1 1	1 1	1 2	1 1	1 2	1 1	1 1	1 2	1 2	1 1	1 2	1 1	1 1	2 2	1 1	1 2	1 1	1 1	1 2	1 2	1 2	1 2	1 1	1 2	1 2	1 1	1 1	1 1	1 2	1 2	2 2	1 1	1 2	1 1	1 2	1 2	1 2	1 1	1 1	1 2	1 2	1 2	1 2	1 2	1 1	1 1	1 1	1 2	1 1	1 2	1 2	1 1	1 1	2 2	1 2	1 1	1 2	0 0	1 1	1 1	1 1	1 2	1 1	1 2	2 2	1 1	1 1	1 1	1 2	1 1	1 1	1 1	1 1	1 2	1 1	1 1	1 2	1 2	1 2	1 1	1 1	1 2	1 2	1 2	1 2	1 2	1 2	1 1	1 2	1 2	1 1	1 2	1 2	1 1	1 1	1 1	1 1	1 1	2 2	1 1	1 2	1 2	1 1	1 2	1 2	1 2	1 1	1 1	1 2	1 1	1 2	1 1	1 1	1 1	1 2	1 2	1 2	1 1	1 1	1 1	1 2	1 2	1 2	2 2	1 1	2 2	1 1	1 1	1 1	1 2	1 2	1 2	1 2	1 2	1 2	1 1	1 2	1 2	1 1	1 2	1 1	1 1	1 2	1 2	1 1	1 1	1 1	1 1	2 2	1 2	1 2	1 2	1 1	1 1	1 1	1 1	1 2	1 2	1 2	1 1	1 2	1 1	1 1	1 2	2 2	1 1	2 2	1 2	1 1	1 1	1 1	1 2	1 2	2 2	1 1	1 2	1 2	1 1	1 2	1 1	1 2	1 1	1 2	1 2	1 2	1 2	1 2	1 1	1 1	1 2	1 2	1 2	1 2	1 2	1 2	1 1	1 2	1 1	2 2	1 2	1 1	2 2	1 1	1 2	1 1	1 2	1 2	1 1	1 1	1 2	1 1	1 1	1 1	1 2	2 2	1 2	1 1	1 1	1 2	1 2	1 1	1 2	1 2	1 2	1 2	1 1	1 2	2 2	1 1	1 1	1 1	1 1	1 1	1 2	1 1	2 2	1 2	1 2	1 1	1 2	1 1	1 2	1 2	2 2	1 2	1 1	1 1	1 2	1 1	1 2	2 2	1 2	1 2	1 1	1 2	1 1	1 2	1 2	1 2	1 2	1 1	1 2	1 2	1 2	1 2	1 1	1 1	1 2	0 0	1 1	1 2	1 1	0 0	1 2	1 2	1 1	1 2	1 1	1 2	1 2	2 2	2 2	1 2	1 1	1 2	1 2	1 2	2 2	1 2	1 2	1 2	1 2	1 1	1 2	1 1	1 2	1 2	1 1	0 0	1 1	1 1	1 2	1 1	1 2	1 2	1 1	1 2	1 1	1 2	2 2	1 2	1 1	1 2	1 2	1 1	1 2	0 0	1 2	1 1	2 2	1 1	1 2	1 1	1 1	1 1	1 2	1 1	1 2	1 2	1 1	1 1	1 2	1 1	1 1	1 1	1 1	1 1	2 2	2 2	1 1	1 2	1 1	1 2	1 2	1 1	2 2	1 1	0 0	1 2	1 1	1 1	1 1	1 2	1 2	1 1	1 1	1 2	1 2	1 2	1 1	1 1	1 2	1 2	1 2	1 1	1 1	1 1	1 2	1 1	2 2	1 1	1 2	1 2	1 1	1 1	1 2	1 2	1 2	1 2	1 2	1 2	1 2	1 1	1 1	1 2	1 2	1 2	1 2	0 0	1 2	1 2	1 1	1 2	1 2	1 1	1 1	2 2	1 1	1 2	1 2	2 2	1 2	1 1	1 2	1 2	1 2	1 1	1 2	1 2	1 2	1 1	1 1	1 2	0 0	1 1	1 1	1 2	1 1	2 2	1 1	1 1	1 2	1 2	1 1	1 2	1 1	1 2	1 2	1 1	1 2	1 2	1 2	1 1	1 2	1 2	0 0	1 2	1 1	1 1	1 1	1 1	1 2	1 2	1 2	2 2	1 1	1 2	1 1	1 2	1 2	1 1	1 1	1 2	1 2	1 2	1 2	1 1	1 2	1 1	1 1	1 2	0 0	1 2	1 1	1 2	0 0	2 2	1 2	2 2	1 2	2 2	1 1	1 2	2 2	1 1	2 2	1 2	1 1	1 2	0 0	1 2	1 2	2 2	1 1	1 1	1 2	1 1	1 2	2 2	1 2	1 1	1 2	1 1	1 2	1 2	1 2	1 2	1 2	1 1	1 1	2 2	1 1	1 2	1 2	1 2	1 1	1 2	1 1	1 2	1 2	1 1	1 1	1 1	1 1	1 1	1 1	1 2	1 2	1 2	1 2	1 2	1 1	1 1	1 2	1 2	1 1	1 2	1 1	1 1	1 1	1 1	2 2	1 1	1 1	1 1	1 1	1 1	1 2	1 2	1 2	1 1	1 1	1 1	1 1	1 2	1 2	1 1	1 2	1 2	1 1	1 1	1 1	1 1	1 2	2 2	2 2	1 1	1 2	1 1	1 1	2 2	1 2	1 2	2 2	0 0	1 1	1 1	1 2	1 2	1 2	1 2	1 2	1 2	1 1	2 2	1 2	1 2	1 1	1 1	1 2	1 1	1 2	1 2	1 1	1 2	2 2	1 1	1 1	1 2	1 1	1 1	1 2	1 2	1 2	2 2	1 2	1 1	1 2	1 2	1 1	1 1	1 1	1 1	1 1	2 2	0 0	1 2	1 2	1 2	1 2	1 2	1 2	2 2	1 2	1 1	1 1	2 2	2 2	1 1	1 2	1 1	2 2	1 1	1 2	1 2	1 1	1 2	1 2	1 2	1 1	2 2	1 1	1 1	1 1	2 2	1 1	1 2	1 2	2 2	1 1	1 2	1 1	1 1	1 2	1 2	0 0	2 2	1 1	1 1	1 2	1 1	2 2	1 2	1 2	1 2	1 1	1 2	1 1	1 1	1 2	2 2	1 2	1 1	1 2	1 1	1 1	1 1	1 2	1 1	2 2	1 2	1 2	1 1	0 0	1 1	1 2	1 1	2 2	1 2	1 1	1 1	1 2	1 1	1 1	1 2	1 2	0 0	0 0	1 2	1 2	1 2	1 1	1 1	2 2	1 2	1 1	1 1	1 2	1 2	1 1	2 2	1 1	1 2	2 2	2 2	1 2	1 1	1 2	1 2	1 1	1 2	1 2	1 2	2 2	1 1	1 2	1 1	1 2	2 2	1 2	1 2	1 2	1 1	1 1	1 2	1 2	1 1	1 2	1 1	1 1	1 2	1 2	1 1	1 1	2 2	1 2	1 2	1 1	2 2	1 1	1 1	1 2	1 1	1 1	1 1	0 0	1 2	1 2	1 2	1 1	1 1	1 2	1 1	1 1	0 0	2 2	1 1	1 2	1 2	2 2	1 2	1 1	1 1	1 2	1 1	1 2	1 2	1 1	1 2	1 1	1 2	1 1	2 2	1 1	1 2	1 1	1 1	1 1	1 2	1 2	1 2	1 1	1 2	1 2	0 0	1 1	1 1	1 1	1 1	1 1	1 2	1 2	1 1	1 2	1 2	1 1	1 2	1 1	1 2	2 2	1 1	1 1	1 1	1 2	1 2	1 2	1 2	2 2	1 2	1 2	1 2	1 2	1 2	1 1	1 2	1 1	1 2	2 2	2 2	1 2	1 2	1 1	1 2	1 2	2 2	1 2	1 1	1 2	1 1	1 2	1 2	1 1	1 1	1 2	1 1	1 2	1 2	1 2	1 1	1 2	2 2	1 2	1 2	1 2	2 2	1 1	1 1	1 1	1 2	1 1	1 2	1 2	1 2	1 1	1 2	1 2	2 2	1 2	1 1	1 1	1 2	1 1	1 2	1 1	1 1	1 2	1 2	1 1	1 1	1 1	2 2	1 2	0 0	1 1	1 2	1 2	1 1	1 1	1 1	1 1	2 2	1 1	1 2	1 1	1 1	1 2	1 1	1 2	1 2	1 2	1 2	1 2	1 2	2 2	1 2	2 2	1 2	1 2	1 2	1 1	1 2	1 1	2 2	1 1	1 2	1 2	2 2	1 2	1 2	1 2	1 2	1 1	1 1	1 1	2 2	1 1	1 1	1 2	1 1	1 2	1 2	1 2	1 2	1 1	1 1	1 1	1 1	1 2	1 1	1 2	1 2	2 2	1 1	1 1	1 2	1 2	1 2	1 1	1 2	1 1	1 2	1 1	1 2	1 1	1 2	1 2	1 2	1 2	1 2	2 2	1 1	1 1	1 1	1 1	1 1	1 2	1 2	1 1	1 2	0 0	1 2	1 1	1 2	1 1	1 1	1 2	1 2	1 1	1 2	1 1	2 2	1 2	1 2	1 1	1 2	1 2	0 0	2 2	1 2	1 2	1 1	2 2	1 1	1 1	0 0	1 2	1 2	1 2	1 2	1 1	1 2	2 2	1 2	1 2	1 1	1 1	1 2	1 1	1 2	2 2	1 1	1 1	2 2	2 2	2 2	1 1	1 1	1 2	1 1	1 1	1 1	1 2	1 2	1 2	1 2	1 1	1 1	1 1	1 1	1 2	2 2	1 2	2 2	1 1	1 1	1 2	1 2	1 1	1 2	1 1	1 2	1 2	2 2	1 1	1 1	1 2	1 2	1 2	1 2	1 2	1 2	1 2	1 1	1 1	1 2	1 2	1 2	1 1	1 1	1 2	1 1	1 2	1 1	1 2	1 1	1 1	1 2	1 1	2 2	1 1	1 2	1 1	1 2	1 2	1 1	1 2	1 2	1 2	1 2	1 2	1 2	0 0	1 2	1 1	1 2	1 1	2 2	1 1	2 2	1 1	1 1	0 0	1 1	1 1	1 1	1 1	1 2	1 1	1 2	1 2	1 2	1 1	1 2	1 2	1 1	1 2	1 2	1 2	1 1	1 2	1 1	1 1	1 1	1 1	1 1	2 2	1 2	1 1	0 0	1 1	1 1	1 2	1 2	1 1	1 2	1 2	1 2	1 2	1 2	2 2	1 1	1 2	2 2	1 2	1 2	1 1	0 0	1 2	1 1	1 1	1 1	1 2	1 2	1 1	1 1	1 1	1 2	1 1	1 1	1 2	1 2	2 2	1 1	1 1	1 1	1 2	1 2	1 1	1 2	1 2	1 2	1 1	0 0	0 0	1 2	1 2	1 2	1 1	1 2	1 2	1 2	1 2	1 2	1 2	1 2	1 2	1 1	1 2	1 2	1 2	1 1	1 2	1 1	1 1	1 2	1 2	2 2	1 2	1 2	1 2	1 2	2 2	1 1	1 1	1 1	1 2	1 2	1 1	1 2	1 2	1 2	2 2	1 2	1 1	1 2	1 2	1 1	1 1	1 1	1 2	2 2	1 1	1 2	1 1	1 1	1 1	1 2	1 1	1 2	1 2	1 2	1 1	1 2	1 1	1 2	1 2	1 1	2 2	1 2	1 2	1 2	1 2	2 2	1 2	1 2	1 1	1 1	1 1	2 2	1 1	0 0	1 2	1 2	1 1	2 2	1 1	1 1	1 1	1 2	2 2	1 2	1 1	1 1	1 1	1 2	1 2	1 1	1 2	1 1	1 1	1 2	1 2	1 1	1 2	1 2	1 2	1 1	1 2	1 2	2 2	1 1	1 2	1 2	1 2	1 1	1 2	1 1	2 2	1 1	1 2	1 1	1 2	1 2	2 2	1 1	1 1	2 2	1 2	1 1	1 2	1 2	1 2	1 2	1 2	1 2	1 2	2 2	1 1	1 2	1 2	1 1	1 1	1 1	1 1	1 2	1 2	1 2	1 2	1 2	1 1	1 1	1 2	1 1	1 1	1 1	1 2	2 2	1 1	1 2	1 2	1 1	1 2	1 2	1 2	1 2	1 2	1 1	2 2	1 2	2 2	1 1	1 2	1 1	1 2	1 1	1 1	1 1	1 1	1 2	1 2	1 2	1 2	1 1	1 2	1 1	1 1	2 2	1 1	1 2	2 2	2 2	1 1	1 2	1 2	1 1	1 1	1 2	1 1	1 1	1 1	1 1	1 2	1 1	1 2	1 2	1 1	1 1	2 2	1 1	1 2	1 2	1 1	1 1	2 2	1 1	1 2	1 2	1 1	1 1	1 2	2 2	1 2	1 2	1 1	1 2	1 1	1 2	1 2	1 2	1 1	1 2	1 1	1 1	1 2	1 2	1 2	1 1	1 2	1 2	1 2	1 2	1 1	1 1	1 1	1 2	1 2	1 1	0 0	1 1	1 1	2 2	1 2	1 1	1 2	2 2	1 1	1 1	1 1	1 2	1 1	1 2	1 1	1 1	1 1	1 2	1 2	1 1	1 2	1 1	1 2	1 2	1 2	1 2	1 2	1 2	1 2	2 2	1 2	1 2	1 1	1 2	1 1	1 1	1 1	1 1	1 2	2 2	1 1	1 2	1 2	1 1	1 2	1 2	1 1	1 2	1 2	1 1	2 2	1 1	1 1	1 2	1 2	1 2	2 2	1 1	1 2	1 2	1 2	1 1	1 1	1 1	1 2	1 1	2 2	1 1	1 1	0 0	1 2	1 1	1 1	1 2	1 1	1 1	1 1	1 1	1 1	1 1	1 2	1 1	1 2	2 2	1 2	1 2	1 1	1 2	1 1	1 2	1 1	1 2	1 1	1 2	2 2	1 1	1 1	1 2	1 1	1 2	1 1	1 1	1 1	0 0	1 1	1 2	1 2	1 2	1 1	1 2	1 2	1 1	2 2	1 1	1 1	2 2	1 2	1 1	1 1	1 2	2 2	1 2	1 2	1 1	2 2	0 0	1 1	1 1	1 2	1 2	2 2	1 1	1 2	1 1	2 2	1 1	1 2	1 2	1 1	2 2	1 2	1 2	1 1	1 2	1 2	1 2	1 1	1 2	1 1	1 1	1 2	2 2	2 2	1 1	1 1	1 1	1 1	1 2	1 1	1 2	1 2	1 2	1 2	1 2	1 1	1 2	1 2	1 1	1 2	1 1	2 2	1 2	2 2	1 1	1 1	1 2	1 2	1 1	1 2	1 2	1 1	1 2	1 2	1 2	1 1	1 1	1 1	1 1	1 1	1 2	1 1	1 1	1 2	1 2	1 2	1 2	2 2	1 2	1 2	0 0	1 1	1 1	1 2	1 2	1 1	2 2	1 2	1 2	0 0	1 2	1 2	1 2	1 2	1 2	1 2	1 1	1 1	1 2	1 1	1 2	1 2	1 2	1 1	1 1	1 1	1 1	1 2	1 1	1 2	1 2	1 1	1 2	1 2	1 1	1 2	1 2	1 2	1 2	1 2	1 1	2 2	1 2	1 1	1 1	1 1	1 1	1 1	2 2	1 1	1 2	1 1	1 1	1 2	1 1	1 1	1 1	1 2	1 1	1 1	1 1	1 2	1 1	1 1	1 2	1 1	1 1	1 2	1 2	2 2	1 2	1 2	1 1	1 2	1 2	1 2	1 1	1 2	1 2	2 2	1 2	1 1	1 2	1 2	1 2	1 2	1 2	1 2	1 2	1 2	1 1	0 0	1 2	1 2	0 0	1 1	1 2	0 0	1 1	1 2	1 1	1 1	1 2	1 2	1 2	1 2	1 1	1 1	1 2	1 2	2 2	1 1	1 1	1 2	1 1	1 2	1 2	2 2	1 1	1 2	1 1	1 2	1 2	1 1	1 1	1 1	1 2	0 0	1 2	1 1	1 2	1 2	1 2	1 1	1 2	1 2	1 1	1 2	1 1	1 1	1 1	1 1	1 2	1 1	1 1	1 2	1 2	1 2	1 1	1 2	1 2	1 2	2 2	1 2	1 1	1 2	1 2	1 1	2 2	1 1	1 1	1 1	1 1	1 2	1 2	1 1	2 2	1 2	0 0	1 1	1 2	0 0	1 2	1 2	2 2	0 0	1 2	1 1	1 1	1 1	1 1	1 2	1 2	1 1	1 2	1 2	1 2	1 1	1 1	1 2	0 0	1 1	1 2	1 1	1 2	2 2	1 2	1 2	1 2	1 1	1 1	1 2	1 2	1 1	1 2	1 2	1 1	1 2	0 0	1 1	1 1	1 1	1 2	1 1	1 2	1 2	1 1	1 1	1 2	1 2	1 2	2 2	1 1	1 1	1 1	1 2	1 2	1 2	1 2	1 1	1 2	2 2	2 2	2 2	1 1	1 2	1 1	1 1	1 1	1 2	1 1	1 2	1 2	2 2	1 1	2 2	1 1	1 2	1 2	1 1	1 2	1 2	1 2	1 1	2 2	2 2	2 2	1 2	1 2	1 1	1 2	1 1	0 0	1 1	1 2	2 2	1 2	1 2	1 2	1 1	2 2	1 2	1 1	1 1	1 2	2 2	1 2	1 1	1 1	1 2	1 1	1 2	1 2	1 2	1 1	1 2	1 2	1 2	1 2	1 2	1 2	1 1	1 2	1 2	1 1	1 2	1 2	1 1	1 2	1 2	1 1	1 1	1 1	1 2	1 1	1 2	1 2	1 2	1 1	1 2	1 2	2 2	1 2	1 1	1 1	1 2	1 2	1 1	1 1	2 2	1 1	1 1	1 2	1 1	1 2	1 1	1 2	1 1	1 1	1 2	2 2	1 2	1 2	1 2	1 2	1 1	1 1	1 2	2 2	1 2	1 2	1 2	1 2	2 2	1 2	1 2	1 1	1 2	1 1	1 1	1 1	1 2	1 1	1 2	1 2	1 2	2 2	1 2	1 2	1 1	1 2	1 2	2 2	1 1	1 1	1 2	1 1	1 1	0 0	1 1	1 2	1 2	1 1	1 1	2 2	1 1	1 2	1 2	1 2	1 2	1 2	1 1	1 2	1 2	1 1	1 2	2 2	1 1	1 2	0 0	1 1	1 1	1 1	2 2	1 2	1 1	1 2	1 2	1 2	1 1	1 2	1 2	1 2	1 1	1 2	1 1	1 2	1 2	1 1	1 2	1 2	1 1	1 2	1 1	1 1	1 2	1 2	1 2	1 1	1 2	1 1	1 2	1 2	2 2	1 1	1 2	1 2	1 2	1 1	1 2	1 2	1 1	1 2	2 2	1 1	1 2	1 2	1 2	2 2	2 2	1 1	1 1	1 2	1 2	2 2	1 1	1 2	1 2	1 1	1 2	1 2	1 2	1 2	1 2	1 2	1 1	2 2	1 1	1 2	1 1	1 2	1 1	1 2	1 2	1 2	1 2	1 2	1 2	1 1	1 2	1 1	1 1	1 2	1 1	1 2	1 2	1 1	1 2	1 2	1 2	1 2	2 2	1 2	1 2	1 2	1 2	1 1	1 1	1 2	1 1	1 2	1 1	1 2	1 2	1 2	1 2	1 1	1 2	0 0	1 1	1 1	1 1	1 2	1 2	1 1	2 2	1 1	1 1	1 2	1 2	2 2	1 1	2 2	1 2	2 2	1 1	1 1	1 1	1 2	1 1	1 2	1 2	1 2	1 1	1 1	1 2	1 2	1 1	1 1	1 2	1 2	1 2	1 1	1 2	1 1	1 1	1 2	1 1	1 1	1 2	1 2	1 1	1 2	1 1	1 1	1 2	1 2	1 1	1 1	1 2	1 2	1 1	1 1	1 2	1 1	2 2	1 2	1 2	1 1	1 1	1 1	1 2	2 2	1 2	1 1	1 1	1 1	1 1	1 1	1 1	1 2	1 2	1 1	1 2	1 2	1 2	1 1	1 2	1 2	1 2	1 1	1 2	2 2	1 1	1 1	1 1	1 1	1 1	2 2	1 2	1 2	1 1	2 2	2 2	1 2	1 2	1 2	1 2	1 1	1 2	1 1	1 1	1 2	1 2	1 2	1 2	1 2	1 1	1 1	1 1	1 2	1 1	1 1	2 2	1 2	1 2	1 2	1 1	1 2	1 1	1 2	1 2	1 2	1 1	1 1	1 2	1 1	1 2	1 1	1 1	1 2	1 2	1 1	1 1	1 2	1 1	2 2	1 2	1 2	1 1	1 2	2 2	2 2	1 2	1 2	1 2	1 2	1 1	1 1	1 2	1 1	1 2	1 2	1 1	1 1	1 2	1 1	1 2	1 2	1 2	1 1	2 2	1 1	1 2	1 1	1 2	1 2	1 2	1 1	1 2	1 2	1 2	1 1	1 1	1 1	1 1	1 2	1 1	1 1	1 2	1 1	2 2	1 1	1 1	1 1	1 2	1 2	1 2	1 1	1 1	1 2	1 1	1 2	1 2	1 1	1 2	1 2	1 2	2 2	1 2	1 2	1 2	2 2	1 1	1 1	1 1	1 1	1 1	1 1	1 2	1 2	1 1	1 1	1 2	2 2	1 2	1 1	1 2	1 1	1 2	1 1	1 1	1 1	1 1	1 2	1 1	1 1	1 1	1 1	1 1	1 1	1 2	1 2	1 1	1 1	2 2	1 1	1 1	1 2	1 1	1 1	1 2	1 2	1 1	1 1	1 1	1 1	1 1	1 2	2 2	1 2	1 1	1 2	1 2	1 2	1 2	1 1	1 2	1 2	1 2	2 2	1 2	1 1	1 1	1 1	1 2	1 2	1 1	1 1	1 2	1 2	1 2	1 2	1 2	1 2	1 2	1 2	1 1	1 1	2 2	1 1	1 2	1 2	1 2	1 1	1 1	1 1	1 2	1 2	1 1	1 1	2 2	1 2	1 1	1 2	1 1	1 2	2 2	1 1	1 1	1 1	1 2	1 2	2 2	1 1	1 1	1 1	1 1	1 1	1 1	1 2	1 1	1 1	1 1	1 2	1 1	1 2	1 2	1 1	1 2	1 2	1 2	1 2	1 2	1 1	1 2	1 1	1 1	1 1	1 2	1 1	1 2	1 2	1 2	1 1	2 2	1 1	1 2	1 2	0 0	1 1	1 1	1 2	1 2	2 2	1 2	1 1	1 2	1 1	1 2	1 2	1 2	1 1	1 1	1 1	1 2	1 1	1 2	1 2	1 1	1 1	1 1	1 2	1 1	0 0	1 2	2 2	1 1	1 1	1 1	1 2	1 2	1 2	1 2	1 1	1 2	1 1	1 1	2 2	1 1	1 1	1 2	2 2	1 2	1 1	1 1	1 2	1 1	1 2	1 2	0 0	2 2	1 2	1 1	1 2	1 2	1 2	1 2	1 1	1 2	1 2	1 2	1 1	1 2	0 0	1 1	1 2	2 2	1 2	1 2	1 2	1 2	1 2	1 1	1 2	1 2	1 2	1 2	0 0	1 2	1 2	1 2	1 2	1 1	1 2	1 2	1 1	1 2	2 2	1 1	1 2	1 2	1 2	1 1	1 2	1 2	1 2	1 2	1 2	1 1	1 1	1 1	1 1	1 1	1 2	1 1	1 2	2 2	1 2	1 2	1 1	1 1	1 2	1 1	1 2	0 0	1 1	1 2	1 1	0 0	1 2	1 1	2 2	1 2	1 2	1 1	1 2	1 1	1 1	1 1	1 1	1 1	1 2	1 1	1 2	1 1	1 1	2 2	1 1	1 2	1 2	1 2	1 1	1 1	2 2	1 2	2 2	1 1	1 1	1 2	1 2	1 1	1 1	2 2	1 1	1 2	1 2	1 2	1 1	1 2	1 2	1 1	1 1	1 2	1 2	1 1	2 2	1 2	1 1	1 2	0 0	1 2	1 2	1 1	1 1	1 1	1 2	1 1	2 2	1 2	1 2	1 2	1 1	1 2	1 1	1 1	1 1	1 2	1 2	1 2	2 2	1 1	1 2	2 2	1 1	1 1	1 1	1 2	1 1	1 1	1 2	1 1	1 1	1 1	1 2	1 2	1 2	1 1	1 1	0 0	1 2	1 1	1 2	1 2	1 2	1 2	1 1	1 2	1 1	1 2	1 2	2 2	1 2	1 2	1 1	1 2	1 2	1 2	1 2	2 2	1 2	1 2	1 1	1 1	1 1	1 2	1 1	1 1	1 1	1 2	1 2	1 2	1 1	1 2	1 2	1 1	1 1	1 2	1 2	1 2	1 1	1 2	1 1	1 2	1 2	1 1	1 1	1 1	1 1	1 2	1 1	1 1	1 2	1 2	1 2	2 2	1 1	1 2	1 2	1 2	1 2	1 2	1 1	0 0	1 2	1 1	1 2	1 1	1 2	1 1	1 1	1 2	1 1	1 2	1 2	2 2	1 1	1 2	1 1	1 1	1 1	1 1	1 1	1 2	1 1	1 1	1 1	1 2	1 2	1 1	1 1	1 1	2 2	1 2	1 1	2 2	1 2	1 1	2 2	1 1	1 1	1 2	1 1	1 1	2 2	1 2	1 1	1 2	1 2	1 1	1 1	1 2	1 2	1 1	2 2	1 1	1 2	1 1	1 2	1 2	1 1	1 2	1 2	1 1	2 2	1 2	1 2	1 2	1 1	1 1	1 1	1 1	1 2	1 2	1 1	1 1	1 2	1 2	1 2	1 1	1 1	2 2	1 2	2 2	1 1	0 0	2 2	1 1	1 1	1 1	1 1	1 2	1 2	1 2	0 0	2 2	1 2	1 2	1 2	1 2	1 2	1 1	2 2	1 1	1 1	1 2	1 2	1 1	1 2	1 2	1 2	1 2	2 2	1 1	1 1	1 2	1 1	1 1	1 2	1 1	1 2	1 1	1 1	0 0	1 2	1 2	1 2	1 2	1 2	1 2	1 2	1 2	1 2	1 1	1 2	1 1	1 2	1 2	1 2	1 2	1 2	1 2	1 2	1 1	1 1	1 1	1 2	1 1	1 1	1 2	1 1	1 2	1 1	1 2	1 1	1 1	2 2	1 1	1 2	2 2	1 2	1 2	1 1	1 1	2 2	1 2	1 1	1 2	1 1	1 2	1 1	1 2	1 1	1 2	2 2	1 1	1 2	2 2	2 2	1 1	1 1	2 2	1 2	1 2	1 1	1 1	1 2	1 2	1 2	1 2	1 1	1 2	2 2	1 2	1 1	1 2	1 2	2 2	1 2	1 1	1 1	1 2	1 2	1 1	1 2	1 1	1 2	0 0	1 1	1 2	1 2	1 1	1 1	1 1	1 2	1 1	1 2	1 2	1 1	1 1	1 2	1 2	1 1	1 2	1 1	1 1	2 2	1 2	1 2	1 1	1 2	1 1	1 2	1 1	1 2	2 2	1 1	1 1	1 2	1 2	0 0	1 2	1 1	1 2	1 1	1 2	1 1	1 1	1 2	1 1	2 2	1 1	1 2	1 1	1 1	1 2	1 1	1 2	1 1	1 1	1 1	1 1	1 2	1 2	1 2	1 2	1 2	1 1	1 1	2 2	1 2	1 2	1 2	1 2	1 2	1 1	1 1	1 1	1 1	2 2	1 2	1 1	0 0	1 1	1 1	1 2	1 1	1 2	1 2	0 0	1 1	1 2	1 2	1 1	1 2	1 2	1 2	1 2	1 2	1 2	1 2	1 1	2 2	1 2	1 1	1 1	2 2	2 2	1 2	1 2	1 2	1 2	1 1	1 2	1 2	1 1	1 2	1 2	1 1	1 2	1 1	1 2	1 2	1 1	1 2	1 1	1 1	1 1	1 2	1 2	1 2	1 1	2 2	1 1	1 2	1 2	1 1	2 2	1 2	1 2	1 1	1 2	1 1	1 1	1 2	1 1	1 1	1 1	1 2	1 2	1 1	1 2	1 2	1 2	1 2	1 2	1 1	1 1	1 1	1 1	1 1	1 1	2 2	1 1	1 1	2 2	1 2	1 1	1 1	1 2	1 1	1 1	1 2	1 1	1 2	1 1	1 1	1 2	2 2	1 2	1 2	1 1	1 2	1 1	1 2	1 1	1 2	1 2	1 1	1 1	1 1	1 1	1 2	1 2	1 2	1 1	1 2	1 2	1 2	1 1	1 2	1 2	1 2	1 2	1 2	1 1	1 1	1 2	1 2	2 2	1 1	1 2	1 1	1 2	2 2	1 2	1 1	0 0	1 1	1 1	1 2	1 2	1 2	2 2	1 2	1 2	1 2	1 1	1 2	1 1	1 2	1 1	1 2	1 1	1 1	1 1	1 2	1 1	1 1	1 2	1 1	1 2	1 1	1 1	2 2	1 2	1 1	1 1	1 2	1 2	1 2	0 0	1 2	1 1	1 1	1 2	1 2	1 2	1 1	1 2	1 2	1 2	1 1	1 1	1 1	1 2	1 2	1 1	1 2	1 2	1 2	1 2	1 2	1 1	1 1	1 1	1 1	1 2	1 2	1 1	2 2	1 1	1 2	1 2	0 0	1 1	1 2	1 1	1 2	1 2	1 1	1 1	1 1	2 2	1 1	1 2	1 1	1 1	1 1	1 2	1 2	1 2	1 1	1 2	1 2	1 2	1 2	1 1	1 1	1 1	1 1	1 2	1 2	1 1	1 2	1 2	1 1	0 0	1 1	1 1	1 1	1 1	1 2	1 2	1 1	2 2	1 2	1 1	1 1	1 1	1 1	1 1	1 2	1 1	1 1	1 2	1 2	1 1	1 1	1 2	1 1	1 1	1 2	1 2	1 2	1 2	1 2	1 2	1 2	1 2	1 1	1 1	1 1	1 1	1 2	1 1	1 1	2 2	1 2	1 1	1 1	1 2	0 0	1 1	1 2	1 2	1 2	1 1	1 2	1 2	2 2	1 2	1 2	1 1	1 1	1 2	1 2	1 1	1 2	1 1	1 2	1 2	1 2	1 2	2 2	1 2	1 1	2 2	1 2	1 2	1 2	1 1	1 1	1 2	1 1	1 1	2 2	1 2	1 1	1 1	1 2	1 1	1 1	1 1	1 2	1 2	1 2	2 2	1 2	1 1	1 2	2 2	2 2	1 2	2 2	1 1	1 2	1 2	1 2	1 1	1 2	1 2	2 2	1 1	1 1	1 1	1 1	1 2	1 1	2 2	1 1	1 1	1 2	1 1	1 2	1 2	1 1	2 2	1 1	1 1	1 2	1 1	1 1	1 2	1 2	1 2	1 2	1 2	1 2	1 2	1 2	1 1	1 1	1 1	2 2	1 2	0 0	1 2	1 1	1 1	1 1	1 1	1 2	1 2	1 2	1 2	1 1	1 1	1 1	1 1	1 1	1 1	1 2	2 2	1 2	1 2	1 2	1 1	1 1	1 2	1 1	1 2	1 2	1 1	1 1	1 1	1 1	1 1	1 1	1 1	1 2	2 2	1 1	1 1	1 1	1 2	1 2	1 2	1 2	1 1	1 1	2 2	1 1	1 2	1 1	1 2	1 1	2 2	1 2	1 2	1 1	1 1	1 2	1 1	1 2	1 2	1 1	1 1	1 1	1 2	1 2	1 2	1 2	1 1	1 2	1 2	1 2	2 2	1 2	1 2	1 1	1 2	1 1	1 1	1 1	1 2	1 1	1 2	0 0	1 2	1 1	1 2	1 1	1 1	2 2	1 2	1 2	1 1	1 1	1 1	1 2	1 1	1 2	1 2	1 1	1 1	1 1	1 1	1 1	2 2	1 2	1 2	1 1	1 1	1 2	2 2	1 1	1 2	1 2	2 2	1 2	1 2	1 1	1 2	1 2	1 1	1 2	1 1	1 2	1 1	1 2	1 1	1 2	1 1	0 0	2 2	1 2	1 1	1 2	1 2	1 2	1 2	1 2	1 2	1 1	2 2	1 2	1 1	1 2	1 2	1 2	2 2	1 2	1 1	1 1	1 2	1 1	1 1	1 1	0 0	1 1	1 2	2 2	1 2	1 2	1 1	1 2	1 2	1 1	1 2	1 1	1 1	2 2	1 2	1 2	1 1	1 2	1 2	1 2	1 2	1 1	1 2	1 2	1 1	1 1	1 1	1 1	1 2	1 2	1 2	1 1	1 1	1 2	1 1	1 1	1 2	2 2	1 1	1 2	1 1	1 1	1 2	1 1	1 2	1 2	1 2	1 1	1 2	1 2	1 2	1 1	1 2	1 1	1 2	1 1	2 2	1 2	1 2	1 1	1 2	1 1	1 1	1 2	1 2	1 2	1 1	1 2	1 1	1 1	1 1	1 1	1 2	1 1	1 1	1 1	1 2	1 1	1 1	1 1	1 1	1 1	1 2	2 2	1 2	1 1	1 2	1 2	1 1	1 2	1 1	1 1	1 1	1 1	1 2	1 1	1 1	1 2	1 2	1 1	2 2	1 1	1 2	1 2	1 2	1 2	1 2	1 2	1 1	1 1	1 2	1 2	1 1	1 1	0 0	1 1	1 1	1 2	1 1	1 1	1 2	1 2	1 2	1 2	1 1	1 1	1 2	1 1	1 2	1 2	1 1	1 1	1 2	1 2	2 2	1 2	1 1	1 2	1 2	1 2	1 1	1 1	1 2	1 2	1 2	1 1	1 1	1 2	1 1	1 1	1 2	1 2	1 1	1 2	1 2	1 1	1 2	1 1	1 1	1 1	1 2	1 1	1 1	1 1	1 2	1 1	1 2	2 2	1 2	1 2	1 1	1 1	1 2	1 2	1 2	2 2	1 1	1 1	1 2	2 2	1 1	1 1	1 1	1 1	1 2	1 1	1 2	1 2	1 1	1 2	1 2	1 2	1 2	1 1	1 2	1 1	1 2	1 1	1 2	1 1	1 2	1 1	1 1	2 2	1 2	2 2	1 2	1 2	1 1	1 2	2 2	1 1	1 1	1 2	1 2	1 2	1 2	1 2	1 2	1 2	1 2	1 2	0 0	1 1	1 2	1 2	1 1	1 2	2 2	1 1	1 1	1 1	1 1	1 2	1 2	1 2	1 2	2 2	1 1	1 2	2 2	1 2	1 1	1 1	1 2	1 1	1 1	1 1	1 1	1 2	1 1	1 2	1 2	1 2	1 2	1 1	1 1	1 2	1 2	1 2	1 2	1 1	1 2	1 1	1 2	1 1	1 1	1 1	1 2	2 2	1 1	1 1	1 2	1 1	1 2	1 1	1 1	1 1	1 2	1 1	1 2	2 2	2 2	1 1	1 2	1 2	1 1	1 1	1 1	1 2	1 2	1 2	1 2	2 2	1 2	2 2	2 2	1 2	1 1	1 1	1 1	1 2	1 2	2 2	1 1	1 2	2 2	1 1	1 1	1 1	1 1	1 1	1 2	1 2	1 1	1 2	1 1	2 2	1 1	1 1	2 2	1 1	1 1	1 2	1 1	1 1	1 2	1 2	2 2	1 1	1 1	1 2	1 2	1 1	1 2	1 2	1 2	1 2	1 2	1 1	1 2	1 1	1 2	2 2	1 2	1 2	1 1	1 1	1 1	1 1	1 1	1 1	1 1	1 2	1 2	1 2	1 1	1 2	2 2	1 1	1 2	1 1	1 2	2 2	1 1	1 2	1 2	1 1	1 1	2 2	1 2	1 2	1 2	1 2	1 2	1 2	1 2	1 1	2 2	1 1	2 2	1 1	1 1	1 1	1 1	1 1	2 2	1 1	1 1	1 2	2 2	1 2	2 2	1 1	1 2	0 0	1 2	1 2	1 2	1 2	1 1	1 2	1 1	1 2	1 1	1 2	1 2	1 1	1 1	1 2	2 2	0 0	1 2	1 2	1 1	1 1	1 1	1 1	1 2	1 2	1 1	2 2	1 2	2 2	1 1	2 2	1 1	1 1	1 2	1 2	1 2	1 2	1 2	1 2	1 1	1 2	1 2	1 1	1 1	1 2	2 2	1 1	1 1	1 2	1 2	1 1	2 2	1 1	1 1	1 1	1 1	1 2	1 1	1 2	1 2	1 2	1 2	1 1	1 2	1 2	1 1	1 2	1 1	1 2	1 1	1 2	1 2	1 2	1 1	1 2	2 2	1 2	1 2	2 2	1 2	1 2	1 2	1 2	1 2	1 2	1 2	1 1	1 1	1 2	1 1	1 1	1 1	1 2	1 1	1 1	1 1	1 2	1 2	1 2	1 1	1 1	1 2	1 2	1 2	1 2	1 1	1 1	1 1	1 2	2 2	1 2	0 0	1 1	1 2	1 2	1 2	1 2	1 2	1 2	1 2	1 2	1 1	1 2	1 2	1 1	1 1	1 1	1 1	1 2	2 2	1 2	1 2	1 2	1 2	1 1	1 1	1 1	2 2	1 2	1 1	1 1	1 1	1 1	1 2	1 1	1 2	1 2	1 2	1 2	1 1	1 1	1 1	1 2	1 2	1 1	1 2	1 1	1 2	1 2	1 1	1 1	1 1	1 1	1 1	1 2	1 1	1 1	1 2	1 1	1 2	2 2	1 1	1 1	1 2	1 2	1 2	1 2	1 2	2 2	1 1	1 2	1 1	1 1	1 1	1 1	1 2	1 2	1 2	1 1	1 1	1 1	1 2	2 2	1 1	0 0	2 2	1 2	1 2	1 1	1 2	1 1	1 2	0 0	1 1	1 2	2 2	1 2	1 2	1 2	1 2	1 2	1 2	1 2	1 1	1 2	1 2	1 1	1 2	1 1	1 1	1 1	1 2	2 2	1 1	1 1	1 2	2 2	1 2	1 2	1 2	1 2	1 1	1 2	1 2	0 0	1 1	1 1	1 1	1 1	1 1	1 2	1 1	1 2	1 1	1 2	1 2	1 2	1 1	1 2	1 1	1 2	1 1	1 2	1 2	1 1	1 1	1 1	1 2	1 2	1 1	1 2	1 1	1 2	1 1	1 2	1 1	1 1	1 1	1 1	0 0	1 1	1 2	1 2	1 2	1 1	1 1	1 2	1 1	1 1	1 2	1 2	1 1	1 1	1 2	1 2	1 1	1 1	1 1	1 1	1 2	1 1	1 1	1 2	1 2	1 2	1 2	1 1	1 2	1 2	1 2	1 1	1 1	1 2	1 1	1 2	1 2	1 2	1 2	1 1	1 2	1 1	1 2	1 1	1 2	1 1	1 2	1 1	1 2	1 1	1 2	1 2	1 2	2 2	2 2	1 1	1 1	1 2	1 1	1 2	1 1	1 1	1 2	1 1	1 2	1 1	1 1	1 2	1 2	1 2	1 1	1 2	1 1	1 2	1 2	1 1	1 2	1 2	1 2	1 2	1 1	1 2	1 1	1 2	1 2	1 2	1 2	1 2	1 2	2 2	1 2	1 2	1 2	1 2	1 2	1 1	1 1	1 2	1 1	1 1	1 2	1 2	1 2	1 2	1 2	1 2	1 2	1 2	1 2	1 1	1 2	1 2	2 2	1 2	1 2	2 2	1 1	1 2	1 1	0 0	1 1	1 1	1 2	1 2	1 1	1 2	1 1	1 2	1 1	1 1	2 2	1 1	1 1	1 1	1 1	1 2	1 2	1 1	1 1	2 2	1 2	1 2	2 2	2 2	1 2	1 2	2 2	1 2	2 2	1 1	1 1	1 2	1 2	1 2	2 2	1 1	1 1	1 2	1 1	1 1	1 2	1 1	1 2	1 1	1 1	1 1	1 2	1 2	1 2	1 2	2 2	1 1	1 2	2 2	1 2	1 2	1 1	1 2	1 1	1 1	1 2	1 1	1 2	1 2	1 1	1 2	1 2	1 1	1 1	1 2	1 2	1 2	1 1	2 2	1 1	1 2	1 2	1 1	1 2	1 1	1 1	1 2	1 1	1 2	1 2	1 2	1 1	1 1	1 1	1 1	1 2	1 2	1 2	1 1	1 1	1 2	1 2	2 2	1 2	1 2	1 1	1 1	1 2	1 1	1 2	1 2	1 1	1 1	1 1	2 2	1 1	1 2	1 2	1 1	1 2	1 1	1 1	1 2	1 1	1 1	1 1	1 2	1 1	1 1	1 1	1 2	1 2	1 1	1 2	1 1	1 1	2 2	1 1	1 2	1 1	2 2	1 2	1 2	1 2	1 1	1 1	1 2	1 2	0 0	1 2	1 1	1 2	1 1	1 2	1 2	1 2	1 2	1 1	1 1	1 2	1 2	1 1	1 2	1 1	1 1	1 1	1 2	1 1	1 1	1 1	1 2	1 2	2 2	1 2	1 1	1 2	1 2	1 2	1 1	1 2	2 2	1 2	0 0	1 1	1 2	1 2	1 2	1 1	1 2	1 1	1 1	1 1	1 2	1 2	1 2	1 2	1 1	1 2	1 1	2 2	1 1	1 2	1 2	1 2	1 1	1 1	1 1	2 2	1 2	1 1	1 2	1 2	1 2	1 2	1 1	1 1	2 2	1 1	1 2	1 2	1 2	1 2	1 2	1 1	1 2	1 1	1 1	1 2	1 2	2 2	1 2	1 1	1 1	1 2	1 1	1 2	1 1	1 1	1 2	2 2	1 2	1 1	1 1	2 2	0 0	1 1	1 2	1 1	1 1	1 1	1 2	1 2	1 2	1 2	1 1	1 1	1 1	1 1	1 1	1 1	1 2	2 2	1 2	1 1	1 2	1 2	1 1	1 1	1 2	2 2	1 2	2 2	1 1	1 1	1 2	1 1	1 2	1 1	1 2	1 2	1 2	2 2	1 2	2 2	1 1	1 2	1 2	1 2	1 1	1 2	1 1	1 2	1 2	1 2	1 2	1 1	1 1	1 1	1 1	1 1	1 1	1 1	2 2	1 1	1 1	2 2	1 2	1 1	1 2	1 2	1 2	0 0	1 2	1 1	1 1	1 2	1 1	1 1	1 2	1 2	1 2	1 2	1 1	1 2	2 2	1 2	1 1	1 1	1 1	1 1	1 2	2 2	1 2	1 2	1 2	1 2	1 1	1 2	1 2	2 2	0 0	1 1	1 1	1 2	1 1	1 2	1 2	1 1	0 0	1 2	1 1	1 1	1 2	1 1	1 1	1 2	1 1	1 1	1 2	1 1	1 1	1 2	1 2	2 2	1 2	1 2	1 2	1 1	1 2	1 2	1 2	1 2	1 2	1 1	1 2	1 2	1 1	1 2	0 0	1 1	1 2	1 2	1 1	1 2	1 2	1 1	1 2	1 1	1 1	1 2	1 2	1 2	1 2	1 1	1 1	1 1	1 2	1 2	1 2	1 2	1 1	1 2	1 1	1 1	2 2	1 2	1 2	1 1	1 2	1 1	1 1	1 2	1 2	2 2	1 2	1 1	1 2	1 2	1 2	1 2	1 2	1 1	1 1	1 2	1 2	1 2	1 2	1 2	1 2	2 2	2 2	1 1	1 2	1 2	1 1	1 1	1 2	1 2	1 2	1 2	1 2	2 2	0 0	1 2	2 2	1 1	1 1	1 2	1 2	1 1	1 2	1 1	1 2	1 1	1 2	1 1	1 1	1 1	1 2	1 2	1 2	1 2	1 1	1 1	1 1	1 1	1 2	1 1	1 2	1 2	1 2	1 1	1 2	2 2	1 1	2 2	1 2	1 2	1 2	1 1	1 2	1 1	1 1	1 1	1 1	1 2	1 2	1 2	1 2	1 2	1 2	1 1	1 1	1 1	1 2	1 2	1 2	1 1	1 2	1 2	0 0	1 2	1 2	1 2	1 1	1 2	1 2	1 2	2 2	1 2	1 2	1 2	1 1	1 1	1 2	1 2	1 1	1 1	1 2	2 2	1 2	1 2	1 2	1 2	2 2	2 2	1 2	1 1	1 2	1 2	1 2	1 2	1 1	1 2	1 1	2 2	1 1	1 2	1 2	1 2	1 2	1 1	1 2	2 2	1 1	1 2	1 1	1 2	2 2	1 1	0 0	1 2	1 2	2 2	2 2	1 1	1 2	1 2	1 2	1 1	1 1	1 2	1 1	1 2	1 2	1 2	1 2	1 1	1 2	1 1	1 1	1 1	1 2	1 1	1 2	1 2	1 1	1 2	1 1	1 2	1 1	1 1	1 1	1 2	1 2	1 2	2 2	1 2	1 2	1 1	1 2	1 2	1 2	1 1	1 2	1 1	1 1	1 2	1 2	1 2	1 2	1 2	1 2	1 1	2 2	1 2	1 2	1 2	1 2	1 1	1 1	1 1	1 2	1 2	1 2	1 2	1 2	1 2	1 1	1 2	1 1	1 1	1 2	1 1	1 2	1 1	1 1	1 2	1 1	1 1	1 2	1 2	2 2	1 1	1 1	0 0	1 1	1 2	1 1	1 2	2 2	1 1	1 1	1 1	1 1	1 2	1 2	1 2	1 2	1 2	1 1	1 2	1 2	1 2	1 1	1 2	2 2	1 2	1 2	1 1	1 1	1 2	1 2	1 2	1 1	1 2	1 1	1 2	1 1	1 1	1 2	1 2	1 2	1 2	1 1	1 1	1 2	1 2	1 1	1 2	1 2	1 1	1 2	1 2	2 2	1 2	1 1	1 1	1 1	2 2	1 1	1 1	1 1	1 1	1 2	1 2	1 1	1 1	1 1	1 2	1 1	1 2	1 2	1 2	1 2	1 2	1 1	1 2	1 1	1 2	1 1	1 1	1 2	1 2	1 2	1 1	1 1	1 2	1 2	2 2	1 1	1 1	1 2	1 2	1 2	1 1	1 1	1 1	1 2	1 2	1 1	0 0	1 1	1 2	1 1	1 1	1 2	1 2	1 2	1 2	1 2	1 1	2 2	1 2	1 1	1 1	1 1	1 1	1 2	1 2	1 2	1 2	1 2	1 2	1 1	2 2	1 1	1 1	1 2	1 1	1 2	0 0	1 2	1 1	1 2	1 1	0 0	1 2	1 2	1 2	1 1	1 1	1 2	1 1	1 1	1 1	1 2	1 1	1 1	2 2	1 2	1 2	1 2	1 2	1 2	1 1	1 2	2 2	1 1	1 2	1 1	2 2	1 2	1 1	1 1	1 1	2 2	1 1	1 1	1 1	1 2	1 1	1 1	1 1	1 1	2 2	1 2	1 1	1 2	1 2	1 2	1 1	1 2	1 2	1 2	1 1	1 2	0 0	1 1	1 1	1 2	1 2	1 2	1 1	1 2	1 1	1 2	1 1	1 1	1 1	1 2	1 1	1 1	1 1	1 2	1 1	1 1	1 2	2 2	1 1	1 2	1 2	2 2	1 1	1 2	1 2	1 2	1 2	1 1	1 1	1 2	1 1	1 2	1 1	1 1	1 2	1 2	1 1	1 1	1 2	1 1	1 1	1 2	1 2	1 1	1 2	1 1	1 2	1 2	0 0	1 1	1 1	1 2	1 2	1 2	1 1	1 2	1 2	1 2	1 2	1 2	1 1	1 2	1 1	1 2	1 1	1 1	1 1	1 2	1 2	1 2	1 2	1 1	1 2	1 2	1 1	1 1	1 1	1 2	1 1	1 2	1 2	1 2	1 1	1 1	1 1	1 2	1 2	1 2	1 1	1 2	1 1	1 1	1 2	1 1	1 2	1 1	1 1	1 2	1 2	2 2	1 2	1 1	1 1	1 1	1 2	1 2	1 1	1 1	1 1	1 1	1 2	1 2	1 1	1 1	1 1	1 1	2 2	1 1	1 2	1 2	1 2	1 2	1 2	1 1	1 2	1 1	1 1	1 2	1 2	1 1	1 2	1 2	1 2	1 2	1 1	1 1	1 2	1 2	1 2	1 2	1 1	1 2	1 2	1 1	1 1	1 1	1 1	1 1	1 2	1 2	1 1	1 2	2 2	0 0	1 2	1 2	1 2	2 2	1 2	1 2	1 1	1 2	1 2	1 2	1 1	1 1	1 1	1 2	1 1	1 1	1 2	1 2	1 2	1 2	1 2	1 2	1 1	1 2	1 1	1 2	1 1	1 2	1 1	2 2	1 2	1 2	1 1	2 2	2 2	1 1	1 1	1 2	1 1	1 2	1 2	1 1	1 1	1 1	1 2	1 2	1 2	2 2	1 1	1 2	1 2	1 1	1 2	1 2	2 2	1 1	1 2	1 1	0 0	1 1	2 2	1 1	1 1	1 2	1 1	2 2	1 1	1 1	1 1	1 2	1 2	1 1	1 2	1 2	1 2	1 1	1 2	1 1	1 1	1 1	1 1	1 1	1 1	1 2	1 2	1 1	1 2	1 2	1 1	1 2	2 2	1 1	1 1	1 1	1 1	1 2	1 2	1 1	1 2	1 1	2 2	1 2	1 1	1 2	1 1	1 2	1 1	1 2	1 1	1 2	1 1	1 2	1 2	1 2	2 2	1 1	0 0	1 2	2 2	1 2	1 1	1 1	1 1	1 1	1 2	1 1	1 1	1 2	1 1	2 2	1 2	1 1	1 1	1 2	1 1	1 1	1 2	1 1	1 2	1 2	2 2	1 2	1 2	1 2	1 2	1 1	1 2	1 1	1 2	1 1	1 1	1 2	1 1	1 2	0 0	1 1	1 1	1 2	1 2	1 2	1 2	1 2	1 2	1 1	1 2	1 2	1 2	1 2	1 1	1 2	2 2	1 2	2 2	1 2	1 1	1 1	1 1	1 1	1 1	2 2	1 2	1 1	1 1	1 1	2 2	1 2	1 1	1 2	1 2	1 1	1 2	1 2	2 2	1 1	2 2	1 2	1 1	1 2	2 2	1 1	1 1	1 2	1 1	1 2	1 1	1 2	1 2	1 2	1 1	1 1	1 1	1 2	1 1	1 1	1 1	1 1	1 2	1 1	1 2	1 2	1 2	1 1	1 1	1 2	1 2	1 2	1 1	1 1	1 2	1 1	1 1	1 1	1 1	1 1	1 1	1 1	1 1	1 2	1 1	1 1	1 2	1 2	1 2	1 2	1 1	1 1	1 2	1 1	1 2	1 1	1 2	2 2	1 2	1 1	1 2	1 2	1 1	1 2	1 2	2 2	1 2	1 1	1 1	1 2	1 1	2 2	1 2	1 2	1 2	1 2	1 2	1 1	1 1	1 1	1 1	0 0	1 1	1 1	1 1	1 1	1 2	1 2	1 2	1 2	1 2	1 2	1 2	1 2	1 1	1 1	1 2	1 1	1 2	1 2	1 1	1 2	1 1	1 1	1 2	1 1	1 1	1 1	1 1	1 2	1 1	1 2	1 2	1 2	1 2	1 1	0 0	1 2	1 1	1 2	1 2	1 2	1 1	1 2	1 2	1 1	0 0	1 2	1 1	1 2	1 1	1 1	1 1	1 1	1 2	1 2	1 1	1 2	1 2	1 1	2 2	1 1	1 1	1 1	2 2	0 0	1 2	1 2	2 2	1 2	1 2	1 2	1 2	1 1	1 2	1 1	1 2	1 2	1 1	1 2	1 2	1 2	1 2	2 2	1 2	1 2	1 1	1 1	2 2	1 2	1 1	1 2	1 2	2 2	1 2	1 1	1 1	1 2	1 1	1 1	2 2	1 2	1 1	1 1	1 2	1 2	1 2	1 1	1 2	1 2	1 2	1 2	2 2	1 2	1 2	1 1	1 2	1 2	1 2	1 1	1 2	1 2	1 2	2 2	1 2	1 2	1 1	1 1	1 2	1 1	1 2	1 1	1 1	2 2	1 1	1 2	1 2	1 2	1 2	0 0	1 1	1 1	2 2	1 1	2 2	1 1	2 2	1 2	1 1	1 2	1 2	1 2	1 1	1 2	1 1	1 2	1 2	1 2	1 1	1 2	1 1	1 2	1 1	1 1	1 2	1 1	1 2	1 1	1 1	2 2	1 2	1 2	1 1	1 2	1 1	1 2	2 2	1 2	2 2	1 1	2 2	1 1	1 2	1 2	2 2	1 1	1 2	1 2	1 2	1 1	1 2	1 1	1 2	1 1	1 1	1 1	2 2	1 2	1 2	1 2	1 2	1 1	1 2	1 1	1 1	1 1	1 2	1 1	1 1	1 1	1 1	1 2	1 2	1 1	1 2	2 2	1 2	1 1	1 1	1 2	1 2	1 2	2 2	1 1	1 1	1 1	1 2	1 2	1 2	1 1	1 2	1 1	1 2	1 2	1 1	1 2	1 1	1 1	1 2	1 2	1 2	1 1	1 1	1 2	1 2	2 2	1 2	1 2	1 2	1 2	1 1	1 1	0 0	1 2	1 2	1 1	1 2	1 2	2 2	1 1	1 2	1 2	1 2	1 1	1 1	1 1	2 2	1 1	1 1	1 2	1 1	1 1	1 2	1 1	1 1	1 2	1 2	1 1	1 2	1 1	1 2	1 1	1 1	1 1	1 1	1 1	1 1	1 2	1 2	1 2	1 1	1 1	1 2	1 1	1 2	1 2	1 1	1 1	1 1	1 2	1 2	1 2	1 2	1 2	1 2	1 2	2 2	1 2	1 1	1 2	1 1	1 2	1 1	1 2	1 1	1 1	1 1	1 2	2 2	1 1	1 1	1 2	1 2	1 1	1 1	1 1	1 2	1 2	1 2	1 1	1 2	1 1	1 1	1 2	1 1	1 2	1 2	1 2	1 2	1 1	1 1	1 1	1 2	1 1	2 2	1 2	1 1	1 1	1 2	1 1	1 2	1 1	1 1	1 1	1 1	1 2	1 2	1 1	1 2	0 0	1 1	1 2	1 1	1 2	1 1	1 1	2 2	1 2	1 1	1 1	1 2	1 2	1 2	1 2	1 2	1 1	1 1	1 1	1 2	1 2	1 1	1 2	2 2	1 2	1 2	1 1	1 1	1 1	1 2	1 1	1 2	1 2	1 2	1 2	0 0	1 1	1 1	1 1	1 1	1 2	1 1	1 1	1 2	1 2	1 2	1 1	1 1	1 2	1 1	1 2	1 1	2 2	1 1	1 2	1 1	1 1	1 2	1 1	1 2	1 2	1 1	1 1	2 2	1 2	1 1	0 0	1 1	1 2	2 2	1 1	1 1	1 2	1 2	1 1	1 1	1 1	1 1	1 1	2 2	2 2	1 1	1 1	1 2	2 2	1 2	1 2	1 2	1 2	1 2	1 1	1 2	1 1	1 2	2 2	1 1	1 1	1 2	1 2	1 1	1 1	1 2	1 2	2 2	1 1	1 2	1 1	1 1	1 2	2 2	1 1	1 2	1 1	1 1	1 1	1 2	1 2	1 2	1 2	1 2	1 1	1 2	1 2	1 1	1 1	2 2	1 1	1 2	1 2	1 1	2 2	1 1	1 2	1 2	1 2	1 2	1 2	1 2	1 2	2 2	1 2	1 2	1 2	1 1	1 2	1 1	1 1	1 1	1 1	1 2	1 2	1 2	1 1	1 1	2 2	1 2	1 1	1 2	1 2	1 1	1 2	1 2	1 2	1 1	1 1	1 2	1 2	1 1	2 2	1 1	1 1	1 1	1 1	1 1	1 1	2 2	1 2	1 2	1 2	1 1	1 1	1 2	1 2	1 2	1 1	1 2	1 1	1 2	1 1	2 2	1 1	1 2	1 2	1 2	1 2	1 1	1 2	1 2	1 1	1 2	1 2	1 1	1 2	1 1	1 1	1 2	1 2	1 1	1 2	2 2	1 2	1 1	1 2	1 1	1 1	1 1	1 2	1 2	1 1	1 1	1 2	1 2	1 2	1 1	1 2	1 1	1 1	1 1	1 2	1 1	1 1	1 2	1 1	1 1	1 1	2 2	1 2	1 1	1 2	1 2	1 2	1 1	1 1	1 1	1 2	1 2	1 2	1 2	1 2	1 1	1 2	1 2	1 1	1 2	2 2	1 1	1 1	2 2	1 2	1 2	2 2	1 1	0 0	1 2	1 1	2 2	2 2	1 2	1 1	1 2	1 2	1 1	1 2	1 2	2 2	1 2	1 2	1 1	2 2	1 1	1 2	1 2	1 1	1 1	1 2	1 1	1 2	2 2	1 2	1 2	1 1	1 2	1 2	1 2	1 1	1 1	1 2	1 2	1 1	1 2	1 2	1 1	1 1	1 1	2 2	1 1	1 2	1 2	1 2	1 2	1 1	1 1	1 1	2 2	2 2	1 2	1 2	1 2	1 1	1 1	2 2	1 1	1 2	1 2	1 2	1 1	1 2	1 2	1 1	1 1	1 1	1 1	1 1	1 2	1 2	1 2	1 2	1 2	1 2	1 1	1 2	2 2	2 2	1 1	1 1	1 1	2 2	1 1	1 1	1 2	1 2	1 1	1 1	1 1	1 2	1 2	1 1	1 2	1 1	1 2	1 1	1 2	1 1	2 2	1 1	2 2	1 2	2 2	1 1	1 2	1 2	1 2	1 1	1 2	1 1	1 1	1 1	1 1	1 2	1 2	1 2	1 1	1 2	1 2	1 2	1 2	1 2	2 2	1 1	1 1	1 1	2 2	1 2	1 2	1 1	1 2	1 2	0 0	1 1	1 1	1 2	1 1	1 1	1 2	1 2	2 2	0 0	1 2	1 1	1 1	1 1	1 2	1 2	1 1	1 2	1 2	1 2	1 1	1 1	1 1	1 2	1 2	1 1	1 2	1 2	1 2	1 1	1 1	1 1	1 2	1 1	1 2	1 1	1 2	1 1	1 2	1 1	1 2	1 1	1 2	1 2	1 2	1 2	1 1	1 2	1 1	1 1	1 2	1 2	1 1	2 2	1 2	1 2	1 1	1 1	1 1	1 1	1 2	1 2	1 1	1 2	1 1	1 1	1 2	1 2	1 2	1 2	1 1	1 2	1 2	1 1	0 0	2 2	1 2	1 2	1 1	0 0	1 1	1 2	1 1	1 1	2 2	1 1	1 2	2 2	1 2	1 2	0 0	1 2	1 2	1 2	2 2	1 1	1 2	1 2	1 1	2 2	1 2	1 1	1 2	1 1	1 1	1 2	1 1	1 1	1 2	1 2	2 2	1 2	1 1	1 2	1 1	2 2	1 1	1 1	1 2	1 2	1 1	1 2	1 2	1 1	1 1	1 1	1 1	1 2	1 2	1 2	1 1	1 2	1 2	1 2	1 2	1 1	1 2	1 2	1 1	1 1	1 2	1 1	1 2	1 1	1 1	1 1	1 2	1 2	1 2	1 1	1 1	1 2	1 1	1 2	1 2	1 1	1 2	1 2	1 1	1 2	1 2	1 2	1 1	1 2	1 1	1 1	1 1	1 2	1 1	1 2	1 1	1 2	1 2	1 2	1 1	1 2	1 2	1 1	2 2	1 2	1 1	1 2	1 1	1 2	1 1	1 1	1 1	2 2	1 2	1 2	1 1	1 1	1 2	1 1	1 2	1 1	1 2	1 2	1 2	1 1	1 2	1 1	1 2	2 2	1 1	1 2	1 1	1 2	1 2	1 2	1 2	1 2	1 1	1 1	1 2	1 1	1 2	1 2	1 2	1 1	1 1	1 1	1 2	1 2	1 2	1 2	1 2	1 2	1 2	0 0	1 2	1 2	1 2	1 2	1 2	1 2	1 1	1 2	1 1	1 2	1 2	1 1	1 1	0 0	2 2	2 2	1 2	1 2	1 1	1 1	1 1	2 2	1 2	1 1	1 2	1 2	1 2	2 2	1 2	1 1	1 2	1 1	1 1	1 1	1 2	1 2	1 2	1 2	1 1	0 0	1 1	1 2	1 1	1 2	1 1	1 2	1 2	1 2	1 2	1 1	1 2	2 2	1 2	1 1	1 1	1 2	1 2	1 1	1 2	1 2	1 1	1 1	1 2	1 2	1 1	1 2	1 2	1 2	1 2	1 1	1 1	1 1	1 2	1 1	1 1	1 2	1 1	1 1	1 1	1 2	1 2	1 2	0 0	1 2	1 2	1 1	1 2	1 2	1 2	1 1	2 2	1 1	1 2	1 1	0 0	1 1	2 2	1 2	1 2	1 2	1 2	1 2	1 1	0 0	1 2	1 2	1 2	1 1	1 1	1 2	1 2	1 1	2 2	1 1	1 1	1 1	1 2	1 1	1 1	1 2	1 2	1 2	1 1	1 2	1 2	1 1	1 2	2 2	1 2	1 2	1 1	2 2	2 2	1 2	1 2	1 1	1 1	1 1	1 2	1 2	1 1	1 1	1 1	1 1	1 1	1 1	1 2	2 2	2 2	1 2	1 2	1 2	1 1	1 1	1 1	1 2	1 1	1 1	1 1	2 2	1 1	1 2	1 1	2 2	1 1	1 2	1 1	1 1	1 1	1 1	1 1	1 1	1 2	1 1	1 1	1 1	1 2	1 1	1 1	1 1	1 2	1 1	1 2	1 2	1 2	1 1	1 1	2 2	1 1	1 2	1 1	1 1	1 1	1 2	1 2	1 1	1 2	1 1	1 1	1 2	1 2	0 0	2 2	1 1	1 2	1 1	1 2	1 2	1 1	1 2	1 2	1 1	2 2	1 2	2 2	1 1	1 1	1 2	1 1	1 1	2 2	2 2	1 2	1 2	2 2	1 2	1 1	1 1	1 2	1 1	1 1	1 2	1 2	1 2	1 2	1 2	1 1	1 2	1 1	1 2	1 1	2 2	1 1	1 2	0 0	1 1	1 1	1 2	1 2	1 2	1 2	1 2	1 2	1 1	1 1	1 1	1 1	1 1	1 1	1 1	1 2	1 1	1 2	1 2	1 2	1 1	1 2	1 1	1 2	1 2	1 1	1 1	1 1	1 1	1 1	1 2	1 1	2 2	1 1	1 1	1 2	1 2	1 2	1 2	1 2	1 1	1 1	1 2	1 2	1 2	1 2	1 1	1 2	1 1	1 1	1 2	1 2	1 1	1 1	1 1	1 1	1 1	1 2	1 2	1 2	1 2	1 2	1 2	1 2	1 2	2 2	1 2	1 2	1 2	2 2	1 1	1 2	1 2	1 2	1 2	1 2	1 2	1 1	2 2	1 2	1 2	1 1	1 2	1 1	1 1	2 2	1 1	1 1	1 1	1 1	1 2	1 1	1 2	1 1	1 2	1 2	1 1	1 2	1 1	1 2	1 2	1 1	1 1	1 1	1 2	1 1	1 1	1 1	1 2	1 2	1 1	2 2	1 2	0 0	1 2	1 1	1 1	1 1	1 1	1 2	1 2	1 2	2 2	1 2	1 2	1 2	1 1	1 2	2 2	1 1	1 2	1 2	1 2	1 2	1 1	1 2	1 2	1 2	1 1	1 1	1 1	1 2	1 1	1 2	1 1	1 2	1 2	1 2	2 2	1 2	1 1	1 2	2 2	1 2	1 2	1 1	1 2	1 1	1 1	1 2	1 1	1 1	1 2	1 2	1 1	2 2	1 2	1 2	1 2	1 1	1 1	1 1	1 1	1 2	1 2	1 1	2 2	1 2	0 0	1 1	1 1	1 2	1 2	1 1	1 2	1 2	1 1	1 2	1 1	1 2	1 2	2 2	1 1	2 2	0 0	1 2	1 2	1 1	1 2	1 2	1 1	1 2	1 2	2 2	1 1	1 1	1 2	1 1	1 1	2 2	1 2	1 1	1 1	1 2	1 2	2 2	2 2	1 1	1 1	1 1	1 1	1 1	1 1	1 1	1 2	1 2	2 2	1 2	1 2	1 1	1 1	2 2	1 2	1 2	1 1	1 1	1 2	2 2	1 2	1 1	1 1	1 2	1 1	1 2	1 1	1 1	1 2	2 2	1 1	1 2	2 2	1 2	1 1	2 2	1 1	1 2	1 1	1 2	1 2	2 2	1 2	1 2	1 1	1 2	1 2	1 1	1 1	1 2	2 2	1 2	1 2	1 2	1 1	1 1	1 2	1 2	1 2	1 1	2 2	1 2	1 2	1 1	1 2	1 1	1 2	0 0	1 1	1 2	1 1	1 2	1 2	2 2	1 1	1 1	1 1	1 2	1 1	1 2	1 1	1 1	1 1	0 0	1 2	1 1	1 1	1 2	1 1	1 2	1 1	1 1	0 0	1 2	1 1	1 1	2 2	1 2	1 1	1 2	1 2	1 1	1 1	1 1	1 1	2 2	1 1	1 1	0 0	1 2	1 2	2 2	1 1	1 1	1 1	1 2	1 2	1 2	1 2	1 1	1 2	1 2	1 2	1 1	1 1	1 2	1 2	1 2	1 2	1 1	1 1	2 2	1 1	1 2	1 2	1 2	1 1	1 2	1 1	1 1	1 1	1 2	1 1	1 2	1 2	1 2	1 2	1 2	1 2	1 1	1 2	2 2	1 2	0 0	1 1	2 2	1 1	1 2	1 2	1 2	1 2	1 2	1 2	1 1	1 2	1 2	1 1	1 2	1 1	1 2	1 2	1 1	1 1	1 1	1 1	1 2	1 1	1 1	1 2	1 1	1 2	1 2	1 1	1 2	1 1	1 1	1 1	1 2	1 1	1 1	1 1	1 1	1 2	1 2	1 2	1 2	1 2	1 1	1 2	1 2	1 2	1 1	1 1	1 2	1 2	2 2	1 2	1 2	1 2	1 2	1 2	1 1	1 1	1 2	0 0	1 2	1 1	1 2	1 2	1 2	1 1	1 2	1 1	0 0	1 1	1 1	1 2	1 2	1 2	1 1	1 2	1 1	1 1	1 1	1 2	1 1	1 2	1 2	1 1	1 1	1 1	1 1	1 1	1 2	1 2	1 1	1 2	1 1	1 1	1 2	1 1	1 2	1 1	1 2	1 2	1 1	1 2	1 1	1 1	1 1	1 2	1 2	1 2	1 1	1 2	1 1	1 2	1 1	1 2	2 2	1 1	1 1	1 1	1 1	1 2	1 2	1 1	2 2	1 2	1 2	1 2	1 2	1 2	1 1	1 1	1 2	1 1	1 1	1 2	1 2	1 2	1 2	2 2	2 2	1 1	1 1	1 2	1 1	1 1	1 1	1 2	2 2	1 2	1 2	1 2	1 1	1 1	1 1	1 2	1 1	1 1	1 2	1 2	1 2	1 2	2 2	1 1	1 1	1 1	1 1	1 2	1 1	1 2	1 2	1 2	1 1	1 2	1 2	1 2	1 1	2 2	1 1	1 2	1 2	1 1	1 2	1 1	0 0	1 1	1 1	2 2	1 1	1 1	1 1	1 1	2 2	1 2	1 1	1 2	1 2	1 2	1 2	1 2	1 2	1 2	1 2	1 2	1 1	1 1	2 2	1 2	2 2	1 1	1 2	1 2	1 1	1 1	1 2	1 2	1 1	1 2	1 1	2 2	0 0	1 2	1 2	1 2	1 1	1 2	1 1	1 1	1 2	1 2	1 1	1 2	1 1	1 2	1 1	1 2	1 2	1 2	1 1	2 2	1 2	1 1	1 1	1 2	1 2	1 2	1 1	2 2	2 2	1 1	1 2	2 2	1 1	2 2	1 1	1 1	1 2	1 2	1 1	1 1	1 1	1 1	2 2	1 1	1 2	1 2	1 1	1 1	1 1	1 2	1 2	1 2	1 2	1 2	1 1	1 1	1 2	1 1	1 1	1 2	1 1	2 2	1 2	1 2	1 1	1 1	1 1	1 1	1 2	2 2	1 1	1 2	1 1	1 1	1 2	1 2	1 1	1 1	1 1	2 2	2 2	1 1	1 2	1 1	1 2	1 2	1 1	1 1	1 1	1 1	1 2	1 1	1 2	1 2	2 2	1 1	1 2	1 2	1 1	1 1	1 1	1 1	1 2	1 1	2 2	1 2	2 2	1 1	1 1	1 2	1 1	0 0	1 2	1 2	1 1	1 1	1 2	1 1	1 1	1 1	1 1	1 1	2 2	2 2	1 2	1 2	1 1	1 1	1 1	1 2	1 2	1 2	1 1	1 2	2 2	1 1	1 1	1 2	2 2	1 2	1 1	1 2	1 1	1 2	1 1	1 1	1 1	1 1	1 1	1 2	1 2	1 1	1 2	1 2	2 2	1 1	1 1	1 1	1 2	1 2	1 2	1 1	1 2	1 2	1 1	1 1	2 2	1 1	1 2	1 1	1 2	1 1	1 1	1 2	1 1	1 1
1	010.x1.GQI119	800.x1.GQI122	400.x1.GQI122	0	0	0 0	1 1	1 1	1 2	1 2	1 1	1 2	1 2	1 1	1 2	1 2	1 2	1 2	2 2	1 1	1 1	1 2	1 2	1 2	1 2	1 1	1 1	1 1	1 1	1 1	1 2	1 2	1 2	2 2	1 1	1 1	1 1	1 1	1 2	1 2	1 1	1 1	1 1	1 1	2 2	1 1	1 2	1 2	2 2	1 2	1 1	1 2	1 2	1 1	1 2	1 2	1 1	1 1	1 2	1 2	1 1	2 2	1 2	1 2	1 1	1 2	1 2	1 2	1 2	1 1	1 1	2 2	1 1	1 2	2 2	1 1	1 1	2 2	1 1	1 2	1 2	1 2	1 2	2 2	0 0	2 2	1 1	1 2	2 2	1 2	1 1	1 1	2 2	1 2	1 1	1 1	1 2	1 1	1 1	2 2	1 1	1 1	1 2	1 1	1 2	1 2	2 2	1 2	2 2	1 1	1 2	1 1	1 2	1 1	1 2	1 1	1 1	1 1	1 2	1 1	1 1	1 2	1 1	1 1	0 0	1 1	1 2	1 2	1 1	1 2	1 2	1 1	2 2	1 2	1 2	1 2	1 2	1 1	1 2	1 1	1 2	1 1	1 1	1 1	1 2	1 2	2 2	1 2	1 2	1 1	1 1	1 1	1 1	1 2	1 1	1 1	1 1	1 1	1 2	1 2	1 1	1 1	1 1	1 1	1 2	1 2	1 2	1 2	1 1	1 2	1 1	1 1	1 2	1 1	1 1	1 1	0 0	0 0	2 2	1 1	2 2	1 1	1 1	1 1	1 1	1 2	1 1	1 1	2 2	1 1	2 2	1 1	1 1	1 1	1 1	1 2	1 1	1 2	1 1	1 2	2 2	1 2	1 1	1 1	1 1	1 2	1 1	1 2	1 1	1 1	1 2	1 1	2 2	1 1	1 1	1 2	2 2	1 2	2 2	2 2	1 2	2 2	0 0	1 2	1 1	1 1	1 1	1 1	1 1	1 2	1 1	1 1	1 1	1 2	1 2	1 1	2 2	1 1	1 2	1 1	1 1	1 1	1 1	1 2	1 2	1 2	0 0	2 2	1 2	1 1	2 2	1 1	1 1	1 1	1 1	1 1	0 0	1 2	1 2	1 2	1 2	1 1	1 2	1 2	1 1	1 2	1 1	1 2	1 1	2 2	1 2	1 2	1 2	1 1	1 1	1 2	1 1	1 1	0 0	2 2	1 2	1 2	1 2	1 1	1 2	1 2	2 2	1 2	1 2	1 1	1 1	1 2	0 0	1 1	1 2	2 2	1 1	0 0	1 1	1 1	1 2	1 2	1 2	1 2	1 2	0 0	1 1	1 2	1 1	1 1	1 1	1 2	1 1	1 2	1 2	1 1	2 2	1 2	1 1	1 1	1 2	1 1	1 2	1 2	1 1	2 2	2 2	1 2	1 1	1 2	1 1	2 2	1 2	1 2	1 2	1 1	1 2	1 1	1 1	1 2	0 0	1 1	1 2	1 2	1 1	1 1	1 1	1 2	1 1	1 1	1 1	1 2	1 2	2 2	2 2	1 1	1 1	1 1	2 2	2 2	2 2	1 2	1 2	1 1	1 1	1 1	1 2	1 1	1 1	1 2	1 2	1 2	2 2	1 1	1 2	1 2	1 1	1 2	1 2	1 1	1 2	1 1	1 1	1 2	2 2	1 1	2 2	1 1	1 2	1 2	1 1	1 2	1 1	1 1	1 1	1 1	1 2	1 1	1 2	1 1	2 2	1 2	1 2	1 1	1 1	2 2	1 2	2 2	1 1	1 2	1 2	1 2	1 1	1 2	1 1	1 1	1 2	1 1	1 1	1 2	1 2	1 1	1 1	1 1	1 1	1 1	1 1	1 2	1 2	1 1	1 1	1 1	1 2	1 2	1 2	1 1	2 2	1 1	1 2	1 2	1 1	2 2	1 2	1 1	1 1	1 2	1 1	2 2	1 2	1 2	1 2	1 2	1 2	1 1	1 2	0 0	1 1	1 1	2 2	1 2	1 2	1 1	1 1	1 1	1 1	1 2	2 2	1 2	1 1	1 2	1 2	0 0	1 2	1 2	1 2	1 1	2 2	1 2	1 2	1 2	1 1	1 2	2 2	1 2	1 1	1 1	1 1	2 2	2 2	2 2	1 2	1 2	1 1	1 2	2 2	1 1	1 2	1 1	1 2	1 1	1 2	1 1	1 1	2 2	1 1	2 2	1 2	1 1	1 1	1 1	1 2	1 2	1 2	1 2	1 2	1 2	1 2	1 2	1 2	2 2	1 1	1 2	2 2	1 1	1 1	1 1	1 1	1 2	1 1	1 1	2 2	1 1	2 2	1 1	1 2	1 1	1 1	1 1	1 1	1 2	1 1	1 1	1 1	2 2	1 2	1 1	1 1	1 1	1 1	1 2	1 2	1 1	1 2	1 2	0 0	1 2	1 1	1 2	1 2	1 2	1 1	1 2	1 2	1 2	1 1	1 1	1 1	1 1	1 1	1 1	1 1	0 0	1 1	1 2	1 2	1 1	0 0	1 2	2 2	0 0	1 2	1 2	1 1	1 2	1 2	1 1	1 2	1 2	1 1	1 2	1 1	1 1	1 2	1 1	1 2	1 1	1 2	1 1	1 2	1 1	1 2	1 2	1 1	1 1	1 2	1 1	1 2	1 2	1 2	1 2	2 2	1 1	1 1	1 1	1 2	2 2	1 1	1 1	1 1	1 2	1 2	2 2	1 2	1 2	1 2	1 2	1 1	1 1	1 2	1 1	1 2	1 1	1 1	1 1	1 1	2 2	2 2	1 2	1 1	1 1	1 1	1 2	1 2	1 2	0 0	0 0	1 1	1 1	1 2	2 2	2 2	1 2	1 2	1 1	1 2	1 1	1 1	1 1	1 1	1 1	1 1	1 1	1 1	1 1	1 2	1 1	1 2	1 2	1 1	1 1	1 2	1 2	1 2	1 1	1 2	2 2	1 1	1 1	1 1	1 1	0 0	1 2	1 2	1 2	1 2	1 2	1 1	1 1	1 2	1 1	1 1	1 2	1 2	1 1	1 1	1 2	2 2	1 2	1 2	1 1	1 1	1 1	2 2	1 2	1 2	1 1	2 2	1 1	1 2	1 2	2 2	1 2	1 2	1 2	1 1	1 2	1 1	1 2	1 2	1 2	1 1	1 1	1 2	1 1	1 2	1 2	1 2	2 2	1 1	1 2	1 1	1 1	1 2	1 2	1 2	1 1	1 2	1 1	1 1	2 2	1 2	1 2	1 2	1 2	1 1	1 2	2 2	1 1	2 2	1 1	1 2	1 1	1 2	1 2	1 2	1 2	1 2	1 1	1 2	1 1	1 2	1 1	2 2	1 2	1 2	1 1	2 2	1 2	1 2	1 1	1 1	1 2	1 1	1 1	1 1	1 1	1 2	1 2	1 2	1 2	1 2	1 2	1 1	1 2	1 1	1 2	2 2	1 2	1 1	1 2	1 1	1 1	1 1	1 2	2 2	1 1	1 2	1 2	1 2	1 1	1 1	1 2	1 1	1 2	1 1	1 2	1 2	1 2	2 2	1 2	1 2	1 2	1 1	1 1	2 2	1 2	1 2	1 1	1 2	1 2	1 2	1 1	1 1	1 2	1 2	1 1	1 2	1 2	1 2	1 2	1 2	1 2	1 1	1 1	1 2	1 1	1 2	1 1	1 2	1 2	1 1	2 2	1 2	1 2	1 1	1 1	1 2	1 1	1 1	1 1	1 2	1 2	0 0	1 1	2 2	1 2	1 2	1 2	1 2	1 1	1 1	1 2	1 2	2 2	2 2	1 1	1 1	1 2	1 1	1 1	1 2	0 0	1 2	1 1	1 1	1 1	1 2	1 2	1 2	1 1	2 2	1 1	1 1	1 1	2 2	1 1	1 1	1 1	1 2	1 2	1 2	1 1	2 2	1 1	1 1	1 1	2 2	1 1	1 2	1 1	1 2	1 1	1 2	1 2	1 1	2 2	1 1	2 2	1 1	1 1	0 0	2 2	1 2	1 2	1 2	1 1	1 2	1 1	1 2	1 1	1 1	2 2	1 2	1 1	2 2	2 2	1 1	1 2	1 1	1 1	1 1	1 2	1 2	1 1	1 2	1 1	1 1	1 1	1 2	1 2	1 2	1 1	1 1	1 1	1 2	1 1	1 2	1 2	1 2	1 2	1 1	1 2	1 2	1 2	1 1	1 2	1 1	1 2	2 2	1 2	1 2	1 2	1 2	1 2	1 1	1 1	1 2	1 2	2 2	1 1	2 2	1 2	1 1	1 2	1 2	1 1	1 1	1 1	2 2	1 2	1 2	1 1	1 2	0 0	2 2	1 2	1 1	1 2	1 2	1 2	1 1	1 2	1 2	2 2	1 1	1 1	1 2	1 1	1 2	1 2	1 1	1 1	1 1	1 2	1 2	1 1	1 1	1 1	1 2	1 2	1 2	1 2	1 2	2 2	1 2	1 2	1 1	1 2	1 1	1 1	1 2	1 2	1 1	0 0	1 1	2 2	2 2	2 2	2 2	2 2	1 2	1 2	1 2	2 2	1 2	1 1	1 2	1 1	2 2	2 2	1 2	1 2	1 1	2 2	1 1	1 1	1 2	1 2	1 1	1 2	1 1	1 2	1 2	1 1	1 1	1 1	1 1	1 1	1 1	1 2	1 1	2 2	0 0	1 2	2 2	0 0	1 1	1 1	1 1	1 1	1 1	1 2	1 1	1 1	1 1	1 1	1 2	1 1	1 1	1 2	1 2	1 1	1 1	1 2	1 2	1 1	1 2	1 1	2 2	1 1	1 2	1 2	2 2	2 2	1 1	1 2	1 1	1 2	1 1	1 2	1 2	1 1	1 1	0 0	1 1	1 2	1 2	1 2	1 2	1 1	1 2	1 2	1 1	1 2	1 2	1 1	1 2	1 2	1 1	1 2	1 2	1 2	1 1	1 2	1 2	1 2	1 1	1 1	1 1	1 2	1 1	1 2	1 2	1 2	1 2	1 2	1 2	0 0	1 1	1 2	1 2	1 1	1 2	1 2	1 2	2 2	1 2	2 2	1 2	1 1	1 1	1 2	0 0	1 2	1 2	1 2	1 2	2 2	2 2	0 0	1 2	1 2	1 2	1 2	1 2	1 2	1 1	1 1	1 1	1 2	1 2	1 2	1 2	1 1	1 1	1 1	1 2	1 1	1 2	1 2	1 1	2 2	0 0	1 1	1 2	2 2	1 1	1 2	1 1	1 1	1 1	1 2	1 2	1 1	1 2	1 2	1 1	2 2	1 2	1 2	1 2	2 2	1 1	1 2	0 0	1 1	2 2	1 2	1 2	1 1	2 2	1 2	1 1	1 2	1 2	1 2	1 1	1 2	1 1	2 2	2 2	1 2	1 2	1 2	1 1	1 1	1 1	1 2	1 1	2 2	1 1	1 1	1 2	1 2	1 1	1 1	1 1	1 2	1 1	1 1	1 2	1 1	1 1	2 2	1 2	1 1	1 2	1 1	1 2	1 2	1 2	1 1	1 1	1 1	1 1	1 2	1 1	1 2	1 1	1 2	1 2	0 0	1 1	2 2	1 1	1 1	1 2	1 1	1 1	1 1	1 2	1 2	1 1	1 2	1 1	1 2	1 1	1 2	1 2	1 2	0 0	1 1	1 2	1 2	1 2	1 2	1 2	1 2	1 1	1 2	1 2	1 1	1 2	1 2	1 2	1 2	1 2	1 2	1 2	1 1	1 2	1 1	1 1	1 1	1 2	1 2	1 1	1 2	1 2	1 1	1 2	1 1	1 1	2 2	1 1	1 2	1 1	1 1	1 1	1 2	1 2	1 1	1 1	2 2	1 1	1 1	1 1	1 1	2 2	1 1	1 2	1 2	1 1	1 2	1 2	1 1	1 2	1 2	2 2	1 2	1 1	1 1	1 2	0 0	1 1	1 1	1 2	1 2	1 1	1 2	2 2	2 2	1 2	1 2	1 1	1 1	1 1	1 1	1 2	1 1	2 2	2 2	1 1	1 1	0 0	0 0	1 2	1 1	1 1	1 1	1 2	1 2	1 1	1 2	1 1	1 1	1 1	1 2	1 2	2 2	1 2	1 2	1 2	1 2	1 1	2 2	1 1	1 1	1 2	1 2	1 2	1 2	1 1	1 2	1 2	1 2	1 1	2 2	1 1	1 1	1 1	1 2	1 2	2 2	2 2	1 2	1 2	1 1	1 2	1 2	1 1	1 1	1 2	1 2	1 2	1 2	2 2	1 2	1 2	1 2	1 1	2 2	1 1	1 1	1 2	1 2	1 1	1 2	1 2	1 1	1 1	1 2	0 0	1 1	1 2	1 1	1 2	2 2	1 1	1 2	1 1	1 1	2 2	1 2	1 2	1 2	1 2	1 1	1 1	1 1	1 2	1 1	2 2	1 1	1 2	1 1	1 2	0 0	1 1	1 1	1 1	1 1	1 2	1 1	1 2	1 2	1 2	1 2	1 1	1 2	1 1	1 1	1 1	0 0	1 2	2 2	1 2	1 2	1 1	1 1	1 2	1 2	1 1	1 2	1 2	1 1	1 1	1 1	1 2	1 2	1 1	1 1	1 1	1 2	1 2	1 2	1 1	1 1	2 2	0 0	1 2	1 1	1 2	1 1	1 2	1 2	1 2	1 2	1 1	1 2	1 1	1 2	1 2	1 2	1 2	1 2	1 2	1 2	1 1	1 2	1 2	1 2	1 2	2 2	1 2	1 1	1 1	1 2	1 2	2 2	1 1	1 2	1 2	1 2	1 2	2 2	1 1	0 0	1 1	1 1	1 2	1 2	1 2	1 2	1 2	2 2	2 2	2 2	1 2	1 2	1 1	2 2	1 2	1 1	1 2	1 2	1 2	1 2	1 2	1 2	1 1	1 2	1 1	2 2	1 1	2 2	1 1	1 2	1 1	0 0	1 2	1 2	1 1	1 2	1 2	1 1	1 1	1 1	1 2	1 1	1 2	1 2	1 2	1 1	1 2	1 2	1 1	1 2	1 2	1 1	1 1	1 2	1 1	1 1	1 1	1 1	2 2	1 1	1 2	1 1	1 2	1 1	1 2	1 1	1 2	1 2	1 2	1 1	1 1	1 1	1 2	1 2	1 1	2 2	2 2	2 2	1 2	1 1	1 1	2 2	1 1	1 2	1 2	1 1	1 2	1 1	2 2	1 1	1 1	2 2	1 2	1 2	1 2	1 2	1 2	1 2	1 2	2 2	1 2	1 1	1 1	2 2	1 2	1 2	1 2	1 1	1 1	1 2	1 2	1 2	1 1	1 2	1 1	1 1	2 2	1 2	1 2	1 1	1 2	0 0	1 1	1 1	1 2	1 1	2 2	1 1	1 1	1 1	1 1	0 0	2 2	1 2	1 1	1 1	1 1	2 2	1 2	1 2	1 2	1 2	1 1	1 2	1 2	1 1	1 2	1 2	1 2	1 2	1 1	1 2	1 1	1 1	1 2	1 1	1 1	1 2	1 1	2 2	1 1	1 1	0 0	1 2	2 2	1 2	1 2	1 2	1 2	1 1	1 1	1 2	2 2	1 2	1 1	1 1	1 2	1 2	1 2	1 1	1 2	1 2	2 2	1 1	1 1	1 1	2 2	1 1	1 2	1 2	1 2	1 2	1 1	2 2	1 1	1 1	1 2	1 2	1 2	2 2	1 1	1 2	2 2	1 2	2 2	1 2	1 2	2 2	1 1	1 2	1 2	1 2	1 2	1 2	2 2	1 1	1 2	2 2	1 2	1 1	1 1	1 2	2 2	1 1	1 2	1 2	2 2	1 2	1 2	1 1	1 2	1 2	1 2	1 1	1 1	1 2	1 2	1 2	1 1	1 2	1 1	1 1	2 2	1 2	1 2	2 2	1 1	1 1	1 2	1 1	1 1	1 2	1 1	1 2	1 1	2 2	1 2	1 1	2 2	2 2	1 1	1 1	1 2	1 2	1 1	1 2	1 1	1 1	1 1	1 1	1 2	1 2	1 1	1 1	1 2	1 1	1 1	1 1	1 2	1 2	1 1	1 2	2 2	1 1	1 1	1 2	1 2	1 1	1 1	1 1	1 1	1 2	2 2	1 1	1 2	1 1	0 0	1 2	2 2	1 2	1 1	1 1	1 2	1 1	2 2	1 2	0 0	1 1	1 1	1 2	1 2	1 2	1 2	1 2	1 1	1 2	1 2	1 2	1 2	1 2	1 1	1 2	0 0	1 2	1 1	1 1	1 1	1 2	1 2	1 2	1 1	1 2	1 1	1 2	1 1	1 1	1 2	2 2	2 2	1 2	1 1	1 1	2 2	1 1	1 1	0 0	1 2	1 1	1 2	2 2	1 1	1 1	1 1	1 2	1 1	2 2	1 2	1 2	2 2	1 2	2 2	1 2	1 2	2 2	1 2	1 2	1 1	1 2	1 2	1 1	0 0	1 1	2 2	1 1	1 1	1 1	1 2	1 2	1 1	1 1	1 1	1 2	1 1	1 1	1 2	1 1	1 1	1 1	1 1	1 2	1 2	1 1	1 2	1 1	1 2	1 2	1 2	1 2	0 0	1 2	1 2	1 1	2 2	1 1	2 2	1 2	2 2	2 2	1 1	0 0	1 2	1 1	1 2	1 1	1 1	1 2	1 2	1 2	1 1	1 2	1 2	1 1	1 1	1 1	1 1	0 0	1 1	1 2	1 2	1 1	1 1	1 1	1 1	1 2	1 2	1 1	1 2	2 2	1 1	1 2	1 2	1 2	1 2	1 1	1 1	1 2	1 2	1 1	2 2	1 2	1 2	1 1	1 2	1 1	1 2	1 2	1 1	1 1	1 1	1 1	1 1	0 0	1 2	2 2	0 0	1 2	1 1	1 2	1 2	0 0	2 2	2 2	1 2	1 1	1 1	1 1	1 1	1 2	1 2	1 2	1 2	1 1	1 1	1 2	1 1	1 2	2 2	2 2	1 1	0 0	1 1	1 1	1 1	1 2	1 1	2 2	1 2	1 2	1 1	1 2	1 2	2 2	1 1	1 2	1 2	1 1	1 1	1 2	1 1	1 1	1 2	1 1	1 2	1 1	1 2	1 1	1 2	1 2	1 1	1 2	1 1	1 1	1 2	1 1	1 1	2 2	1 2	1 1	2 2	1 2	1 1	1 1	1 1	1 2	1 1	1 1	1 1	1 2	0 0	1 1	1 1	0 0	1 1	1 2	1 1	1 1	1 1	1 2	1 2	1 1	1 2	1 1	0 0	1 2	1 1	1 2	1 1	1 1	1 1	1 1	2 2	1 1	1 1	2 2	1 1	2 2	1 2	1 2	1 1	1 1	1 1	2 2	1 1	2 2	1 2	2 2	1 1	1 1	1 2	1 2	1 2	1 1	1 2	1 2	1 2	1 2	1 1	1 2	1 2	2 2	1 1	1 1	1 2	1 1	1 2	2 2	1 2	1 1	1 1	2 2	0 0	1 1	1 2	1 2	1 2	1 1	1 2	1 2	1 1	2 2	0 0	1 2	1 2	1 1	1 2	1 1	1 1	2 2	1 1	1 1	1 1	1 2	0 0	1 2	1 2	1 2	1 2	1 2	2 2	1 2	1 1	1 2	1 2	2 2	1 2	1 1	1 2	1 2	2 2	1 2	1 1	1 1	1 2	1 2	1 1	1 1	1 1	1 2	1 1	1 1	1 2	1 1	1 1	1 1	1 2	1 2	1 2	1 1	1 1	1 1	1 1	1 2	1 1	1 1	1 1	1 1	1 1	1 2	1 1	1 2	1 2	1 2	1 2	1 1	1 1	1 2	1 1	1 1	1 2	1 2	2 2	1 1	1 1	1 1	1 2	1 2	1 1	1 2	1 2	2 2	1 2	2 2	1 1	1 1	1 1	1 2	1 1	1 2	1 2	1 2	1 1	1 1	2 2	1 1	1 1	1 2	1 1	1 2	1 1	1 1	1 1	1 1	1 2	1 2	1 1	1 2	1 2	1 1	1 2	1 1	1 1	1 1	1 2	1 2	1 1	1 2	1 2	1 1	1 1	1 1	1 2	1 2	1 2	1 1	1 1	1 1	1 1	1 2	2 2	1 2	1 1	1 2	1 1	1 2	0 0	0 0	1 2	2 2	1 1	1 1	1 1	1 2	1 2	1 2	1 2	1 1	1 1	1 2	1 1	1 1	1 1	1 1	1 1	1 1	1 2	1 2	1 1	1 1	1 1	1 2	1 1	1 2	1 1	1 1	1 1	1 2	1 1	1 1	1 2	1 2	1 2	1 2	1 2	1 2	1 2	1 2	1 2	1 1	1 2	1 1	1 1	1 2	1 1	2 2	1 1	1 1	1 1	1 2	1 2	1 1	1 2	1 1	1 2	1 2	2 2	1 2	1 1	1 1	1 2	2 2	1 2	1 2	1 2	1 2	1 2	1 2	0 0	1 2	1 1	1 1	1 2	1 1	2 2	1 1	1 2	2 2	1 2	1 2	1 1	1 2	1 2	1 1	1 2	0 0	1 2	1 2	1 1	1 1	1 1	1 2	2 2	1 2	1 1	1 1	1 1	1 1	1 1	1 2	1 1	1 2	1 1	1 1	1 1	1 2	1 2	1 2	0 0	1 2	1 1	1 2	1 1	1 1	1 2	1 2	1 2	1 1	1 2	1 1	2 2	1 2	1 2	1 2	1 1	1 2	1 2	1 1	1 2	1 1	1 1	2 2	1 1	1 2	1 2	1 1	1 1	1 2	1 2	1 1	0 0	1 1	1 2	1 2	1 1	1 1	1 1	1 1	1 2	1 2	1 2	1 2	1 2	1 1	1 2	1 1	1 2	1 2	1 2	1 2	1 2	1 2	1 1	1 1	1 1	1 1	1 2	1 1	2 2	1 2	1 1	1 2	1 2	1 1	2 2	1 1	1 2	2 2	0 0	1 2	0 0	2 2	1 2	1 1	1 2	1 1	1 1	2 2	1 1	1 2	1 1	1 2	1 2	1 2	1 2	1 2	1 2	0 0	1 1	1 1	2 2	1 1	1 2	1 2	1 2	1 2	1 1	2 2	1 2	1 2	1 2	1 2	1 1	1 1	1 2	0 0	1 1	1 2	1 1	1 1	1 1	1 1	2 2	1 1	1 2	1 1	2 2	1 1	1 1	1 1	1 1	1 2	1 1	2 2	1 2	1 1	1 2	0 0	1 1	1 2	2 2	1 1	2 2	1 1	1 1	1 1	1 2	1 2	1 1	2 2	1 1	0 0	1 1	1 1	1 2	1 2	1 1	1 2	1 2	1 2	1 2	1 2	2 2	1 2	1 1	1 2	1 1	1 1	1 1	1 2	2 2	1 1	2 2	1 1	1 1	1 2	1 2	1 2	1 2	1 1	2 2	1 1	0 0	1 1	1 2	1 1	2 2	1 2	1 2	1 2	2 2	1 1	1 1	1 2	1 1	1 1	1 2	1 1	1 1	1 1	1 2	1 1	1 2	1 1	1 2	1 1	1 2	1 2	2 2	1 2	1 1	1 2	1 2	1 1	1 2	1 1	2 2	1 1	2 2	1 1	1 2	1 1	1 2	1 1	1 1	1 2	1 1	1 2	1 2	1 1	1 2	1 1	1 1	1 2	2 2	1 1	1 2	1 2	1 2	1 2	1 2	2 2	1 2	1 2	1 1	1 2	1 2	2 2	1 1	1 2	1 1	1 2	1 1	1 1	1 1	1 1	1 2	1 2	1 1	1 1	1 2	1 2	2 2	1 1	1 2	1 2	1 1	1 2	0 0	1 2	1 2	1 2	1 2	1 1	1 2	1 1	1 2	1 2	1 2	2 2	1 1	1 2	1 2	1 2	1 2	1 2	1 2	1 1	1 2	1 2	1 1	1 1	1 2	1 1	1 2	1 2	0 0	1 2	1 2	1 2	2 2	1 2	1 2	2 2	1 1	1 2	1 1	1 2	1 1	1 1	1 2	1 2	1 1	1 1	1 1	1 2	1 2	1 1	1 1	1 2	1 1	1 2	1 1	1 2	1 1	1 2	1 2	1 1	1 1	1 2	1 2	1 1	2 2	1 1	1 1	1 2	2 2	1 2	1 2	1 2	1 2	1 1	1 1	1 2	1 2	0 0	1 1	1 1	1 2	2 2	1 1	1 2	1 1	1 2	1 1	1 2	1 1	1 1	1 2	1 1	1 1	1 2	2 2	1 1	1 1	1 1	1 1	1 1	1 1	1 1	1 1	1 1	1 2	1 2	1 2	1 1	1 1	1 1	2 2	1 2	1 2	1 1	1 1	1 1	1 2	1 2	1 1	2 2	1 1	1 1	1 2	1 1	1 2	1 2	2 2	1 1	1 1	1 2	1 1	1 2	1 1	1 1	1 2	1 2	1 2	1 1	2 2	1 1	1 1	1 1	1 1	1 2	1 1	0 0	0 0	1 1	1 2	1 1	1 1	1 1	1 2	1 2	0 0	1 2	2 2	1 1	1 2	1 1	1 1	1 1	1 2	2 2	1 1	1 2	0 0	1 2	1 1	2 2	2 2	1 2	1 1	1 1	1 1	2 2	1 2	1 1	1 2	1 1	1 1	1 2	1 1	1 2	1 1	1 2	1 1	1 2	1 1	1 1	1 2	1 2	1 2	1 2	2 2	1 2	1 1	1 1	1 1	1 1	1 2	2 2	1 2	1 2	1 2	2 2	1 1	1 2	1 2	1 1	1 2	1 1	1 1	1 2	1 1	1 2	1 1	1 1	1 1	1 2	1 2	1 2	1 2	1 2	1 2	1 1	1 1	2 2	1 2	1 2	1 2	1 1	1 1	2 2	1 2	1 2	1 2	1 2	1 2	1 1	1 1	1 1	1 2	1 1	1 2	1 2	1 1	1 1	1 1	2 2	1 2	1 2	1 2	0 0	1 2	1 1	2 2	1 1	1 2	1 2	1 2	1 2	1 1	2 2	1 2	1 2	2 2	1 2	1 2	1 2	2 2	1 1	1 2	0 0	1 1	1 2	1 2	1 2	1 2	1 1	1 1	1 2	1 2	1 2	1 1	1 1	2 2	1 2	1 1	2 2	1 1	1 2	1 2	1 1	2 2	1 1	1 1	1 2	1 2	1 1	1 2	1 2	1 2	1 2	1 2	1 1	1 2	1 1	1 2	1 2	1 2	1 1	1 2	2 2	1 2	1 1	2 2	1 1	1 2	1 2	1 1	1 1	1 1	1 2	2 2	1 1	1 1	1 1	1 1	1 1	1 2	2 2	1 2	1 2	1 1	1 2	1 1	1 2	1 2	1 2	1 2	1 2	1 2	1 1	2 2	1 2	1 1	1 1	1 2	1 2	1 2	1 1	0 0	1 2	2 2	1 2	1 1	1 2	1 1	1 2	2 2	1 1	0 0	1 2	1 1	1 2	1 1	1 1	1 2	1 2	1 1	1 1	1 2	0 0	1 1	1 2	1 2	1 2	1 2	1 2	1 1	1 2	1 2	1 2	1 2	1 2	1 1	1 2	1 1	1 2	1 1	1 2	1 1	1 1	1 1	1 2	1 1	1 1	1 1	1 2	1 2	1 2	1 1	1 1	1 1	1 1	1 1	1 1	1 2	1 2	2 2	1 2	0 0	1 1	1 2	1 2	1 2	1 2	1 2	1 2	1 1	1 1	1 2	2 2	1 2	1 1	1 2	2 2	1 1	1 2	1 1	1 2	2 2	1 2	1 1	1 1	1 1	1 1	1 1	1 1	1 1	1 1	1 2	1 2	1 1	2 2	1 1	1 2	1 1	1 1	1 1	1 1	1 2	2 2	1 2	1 1	1 1	2 2	1 2	1 1	1 2	1 2	1 1	1 1	1 2	1 2	1 1	1 2	1 1	1 1	1 2	1 2	1 2	2 2	1 2	1 2	1 1	2 2	1 2	1 2	1 1	1 1	1 1	1 1	1 2	0 0	1 1	2 2	1 2	1 2	1 1	1 1	1 2	1 2	1 1	1 1	2 2	1 2	1 2	1 2	1 1	1 2	1 2	1 2	1 1	1 2	1 1	2 2	1 1	1 1	1 1	1 2	2 2	1 2	1 2	1 1	1 2	0 0	1 2	1 1	2 2	1 2	1 2	1 2	1 1	1 2	1 2	1 1	1 1	1 1	1 1	1 2	1 1	1 1	1 2	1 2	1 2	1 1	1 2	1 2	1 1	1 2	1 1	1 2	1 1	1 2	1 1	1 2	1 1	1 2	1 1	1 1	1 1	1 2	1 2	1 2	1 1	1 2	2 2	1 1	1 1	2 2	1 1	1 1	1 1	1 1	1 2	1 1	1 2	1 1	1 1	2 2	1 2	1 2	1 2	1 1	1 1	1 1	1 2	1 1	1 1	1 2	1 1	1 1	1 1	1 1	0 0	1 1	1 1	1 1	1 1	1 1	1 1	1 1	1 2	1 2	0 0	1 2	2 2	1 1	1 1	1 2	1 1	2 2	1 2	1 2	1 1	1 2	1 1	1 2	1 1	1 1	1 2	1 1	0 0	1 1	1 2	1 2	2 2	2 2	1 2	1 1	1 1	1 1	2 2	1 1	1 2	1 2	1 1	1 2	1 2	1 2	1 1	1 1	1 1	1 2	1 2	1 1	2 2	1 2	1 2	1 2	1 2	1 1	1 1	1 2	1 2	1 1	2 2	1 1	1 1	1 1	1 1	1 2	1 2	1 2	1 2	1 2	1 1	1 1	1 1	1 2	1 2	2 2	2 2	1 1	1 2	1 1	1 1	1 1	1 1	1 2	1 1	1 1	1 1	0 0	1 1	1 2	1 2	1 1	2 2	1 2	1 1	1 2	1 1	1 1	1 1	1 1	0 0	1 2	1 1	0 0	1 1	1 2	1 2	1 1	1 1	2 2	1 2	1 2	1 2	0 0	1 1	1 1	0 0	1 2	1 1	1 2	1 1	1 2	0 0	1 2	1 2	1 1	1 1	1 2	1 2	1 1	1 1	1 1	1 1	1 2	1 1	1 2	1 2	1 2	1 1	1 1	1 1	2 2	1 2	1 2	1 2	2 2	1 1	1 2	2 2	2 2	1 2	1 2	1 1	1 2	1 2	1 2	1 2	1 2	2 2	1 1	0 0	1 1	2 2	1 2	1 1	1 2	1 1	1 1	1 1	1 1	1 1	1 2	1 1	1 2	1 1	1 2	1 1	1 2	1 2	1 2	1 1	1 2	1 1	1 2	1 2	1 2	1 1	1 2	1 2	1 2	2 2	1 2	1 1	1 2	1 2	1 1	1 2	1 2	2 2	1 2	1 1	1 2	1 1	1 2	1 1	2 2	1 1	2 2	1 1	1 2	1 2	1 2	1 1	1 2	1 2	1 1	1 1	1 2	1 2	1 1	1 2	1 1	1 1	1 1	1 2	1 2	1 1	2 2	2 2	1 1	1 1	2 2	1 2	1 1	1 2	1 1	1 2	1 1	1 1	1 2	1 1	1 2	1 1	1 1	2 2	2 2	1 2	1 1	1 1	2 2	1 2	1 2	2 2	1 1	1 1	1 2	1 2	2 2	1 2	1 1	1 2	1 1	1 2	1 1	1 1	1 1	1 1	1 2	1 2	1 2	1 2	1 1	0 0	1 2	1 2	1 1	1 2	1 1	1 2	1 1	1 1	0 0	1 1	1 1	1 2	1 1	1 2	1 2	1 2	1 2	1 2	0 0	1 2	1 2	1 2	1 1	0 0	1 2	1 1	1 1	1 2	2 2	1 2	1 2	1 1	1 1	1 1	1 2	1 1	1 2	1 2	1 2	1 2	1 1	1 2	1 2	1 1	1 1	0 0	1 2	1 2	1 2	1 1	1 2	1 2	1 1	1 1	1 1	1 1	1 2	2 2	1 1	1 2	1 1	1 2	1 2	2 2	1 1	1 2	1 1	0 0	1 1	2 2	1 2	1 2	1 2	1 1	2 2	1 2	1 1	1 2	1 1	1 2	1 2	1 1	2 2	1 2	1 1	1 2	1 1	1 1	1 1	1 2	1 1	1 2	1 2	1 1	1 2	1 2	1 2	1 1	1 2	1 1	1 2	1 2	1 2	1 1	1 1	1 2	2 2	1 1	1 1	2 2	1 1	1 1	1 2	1 1	1 2	1 1	1 2	1 1	1 2	1 1	1 1	1 1	1 1	1 2	2 2	1 1	1 2	1 2	1 1	1 1	1 2	1 2	1 1	2 2	2 2	1 1	1 2	2 2	1 1	1 2	1 1	1 2	1 1	1 2	1 2	1 2	2 2	1 2	1 2	1 1	1 1	1 2	1 2	1 2	2 2	1 1	1 1	1 1	1 1	1 1	2 2	1 1	1 2	1 2	1 1	1 1	1 2	1 2	1 1	1 1	1 2	1 1	1 2	1 2	1 2	1 2	1 2	1 1	1 2	1 2	1 1	1 2	0 0	1 2	1 2	1 1	1 1	1 1	1 1	1 1	1 2	1 1	1 1	1 1	1 2	1 1	1 2	1 1	1 1	1 2	1 1	1 2	1 1	1 1	1 1	1 1	1 1	1 1	1 2	1 2	1 2	1 1	1 1	1 2	1 1	1 1	1 1	1 1	2 2	0 0	1 2	1 1	1 1	2 2	1 2	1 2	1 1	1 2	0 0	1 2	2 2	1 2	1 2	1 2	1 1	1 2	1 1	2 2	1 2	1 1	1 2	1 2	1 2	1 1	1 2	2 2	1 2	1 2	1 2	1 2	1 2	1 2	1 1	1 2	1 1	1 2	2 2	1 1	1 2	2 2	1 2	1 1	1 2	1 2	1 2	1 2	2 2	1 1	1 1	1 1	1 2	1 2	1 1	1 2	2 2	1 1	1 1	1 1	1 1	2 2	1 1	1 2	1 1	1 1	1 1	1 2	1 2	1 1	1 1	1 1	1 2	1 2	1 1	1 2	1 1	1 1	1 2	1 2	1 1	1 1	1 1	1 2	1 2	1 1	1 2	2 2	1 2	2 2	2 2	1 2	1 2	0 0	2 2	1 2	1 2	1 2	1 1	1 1	1 2	1 2	1 1	2 2	1 1	1 1	1 2	2 2	1 2	1 2	1 2	1 1	0 0	1 2	1 1	1 1	1 1	1 1	2 2	2 2	1 2	1 1	1 2	1 2	2 2	1 2	1 2	1 1	1 2	1 1	1 2	1 2	1 1	1 1	1 1	1 2	1 2	1 1	1 2	1 1	0 0	1 2	1 1	2 2	1 2	1 2	1 1	1 1	2 2	1 2	1 2	2 2	1 2	1 2	1 2	1 2	1 1	1 1	2 2	1 1	1 1	1 2	1 2	1 1	1 2	1 1	1 2	1 2	1 2	1 2	1 1	2 2	1 2	1 1	1 2	1 2	1 1	1 2	1 2	1 2	2 2	1 1	1 1	2 2	1 1	2 2	0 0	1 2	1 2	1 1	1 2	1 1	2 2	1 2	1 2	1 1	1 1	1 2	1 2	1 2	1 2	1 1	1 2	1 2	1 2	1 1	1 2	1 1	1 2	1 1	1 2	1 1	1 2	1 1	1 2	2 2	1 1	1 1	1 1	1 1	1 1	1 2	1 2	1 1	2 2	1 1	2 2	1 2	1 2	1 2	1 2	1 2	1 1	1 1	1 2	1 2	1 2	1 2	1 2	2 2	1 2	1 1	1 2	1 1	1 1	1 1	1 1	1 2	1 1	0 0	2 2	1 1	1 2	1 1	1 1	1 1	2 2	1 1	1 1	1 2	2 2	1 1	2 2	1 1	1 2	2 2	1 1	1 1	1 2	1 2	1 2	1 1	1 2	1 1	1 1	1 2	1 2	1 2	1 2	1 2	2 2	1 2	1 1	1 2	1 1	1 1	1 1	1 2	1 2	1 2	1 2	1 2	1 1	1 2	1 1	1 2	1 2	1 1	1 2	1 2	2 2	1 1	1 1	1 2	1 1	1 2	1 2	1 2	1 2	0 0	2 2	1 2	1 2	1 2	1 1	2 2	1 1	1 2	1 2	1 2	1 2	1 1	1 2	1 1	1 2	1 1	1 2	1 1	1 2	1 2	1 1	1 1	1 2	1 1	1 1	1 2	2 2	1 1	2 2	2 2	1 1	1 1	2 2	1 1	1 2	1 1	0 0	1 1	1 2	2 2	1 2	1 2	1 2	1 2	0 0	1 2	1 2	1 2	1 1	1 1	1 1	1 1	1 1	1 1	1 1	1 1	1 2	1 2	2 2	1 1	1 2	2 2	2 2	1 2	1 1	1 2	1 2	1 2	1 1	1 2	1 2	1 1	1 1	1 2	1 2	1 1	1 1	1 1	1 1	1 2	1 1	1 1	1 1	1 2	1 2	2 2	1 1	1 2	2 2	1 2	1 2	1 2	2 2	1 2	1 1	1 2	1 2	1 1	1 1	1 1	1 2	1 1	1 1	1 1	1 1	1 1	1 1	1 2	1 2	1 1	1 1	1 2	1 2	2 2	2 2	1 2	1 1	1 2	1 2	1 1	1 2	1 2	1 2	1 1	1 2	1 2	1 2	1 1	1 2	1 2	1 2	1 1	1 1	2 2	1 2	1 2	1 1	1 1	1 1	1 2	1 2	1 2	1 2	1 2	1 2	1 1	1 2	1 1	1 1	1 1	2 2	1 1	1 2	1 2	1 2	1 1	1 2	1 2	1 2	1 2	1 1	1 1	1 1	1 2	2 2	1 1	1 2	0 0	1 2	1 2	1 2	2 2	1 2	1 1	1 2	1 1	1 2	1 1	1 2	1 1	1 2	1 2	1 1	1 2	1 2	2 2	1 2	1 1	1 1	1 1	1 2	1 1	1 2	1 2	1 1	1 1	1 1	1 1	2 2	1 2	1 1	1 2	1 1	0 0	1 2	1 1	1 2	2 2	1 1	1 2	1 1	1 2	1 2	0 0	2 2	1 1	1 2	1 1	1 1	1 1	1 2	1 2	1 1	1 1	1 2	2 2	1 2	1 2	1 1	1 1	1 2	1 2	1 1	1 2	1 2	1 2	1 2	1 2	1 2	1 1	1 2	1 2	1 1	1 2	1 2	1 1	1 1	2 2	1 1	1 1	1 1	1 2	1 2	1 1	2 2	2 2	1 1	1 2	1 2	1 2	1 1	1 1	1 2	1 1	1 2	1 1	2 2	1 2	1 1	1 2	1 2	1 2	1 1	1 2	1 2	1 2	2 2	1 1	1 1	2 2	1 1	1 2	2 2	1 2	1 2	1 1	2 2	1 2	1 2	1 2	1 1	1 1	1 1	1 1	1 1	1 2	1 1	1 1	1 2	1 2	2 2	1 1	1 2	1 2	1 1	1 2	1 1	1 2	1 2	1 1	1 1	1 1	1 2	1 2	1 2	1 2	1 1	1 1	1 1	1 1	1 2	1 1	1 1	1 1	2 2	1 1	1 1	1 2	1 2	1 1	0 0	2 2	1 2	1 2	1 2	1 2	1 1	1 1	1 2	2 2	1 1	1 2	1 1	1 1	1 1	1 2	1 1	1 1	1 1	1 2	1 2	1 2	1 1	1 2	1 1	1 1	1 2	1 1	2 2	1 2	1 1	1 1	1 2	1 1	1 2	2 2	2 2	2 2	1 1	2 2	1 2	2 2	1 2	1 2	1 1	1 2	1 2	1 2	1 1	1 2	1 1	1 1	1 2	1 2	1 1	1 1	1 2	1 2	0 0	1 1	1 1	1 1	1 1	1 1	1 2	1 1	1 1	2 2	1 1	2 2	1 1	1 2	1 2	1 1	1 2	1 1	1 1	1 2	1 2	1 2	1 2	1 1	1 1	1 2	1 2	2 2	1 1	1 2	2 2	1 2	1 1	1 1	1 2	1 1	1 1	1 2	1 1	1 1	1 2	1 2	0 0	2 2	2 2	1 2	1 2	0 0	1 2	1 2	1 1	1 2	1 1	1 2	1 2	1 1	1 2	1 1	1 2	1 1	1 2	1 1	1 2	1 2	1 1	1 1	2 2	1 1	1 2	1 1	1 2	1 2	1 2	1 2	1 1	1 2	1 1	1 2	1 2	1 1	1 1	1 2	1 2	0 0	1 1	1 2	1 2	1 2	2 2	1 1	2 2	1 2	2 2	1 2	1 1	1 2	1 1	1 1	1 1	1 1	1 1	1 2	1 1	1 1	2 2	1 2	1 1	1 1	1 1	1 1	1 2	1 2	1 1	1 1	1 2	1 1	1 1	1 1	1 2	2 2	1 1	1 1	1 2	1 1	1 2	1 1	1 1	1 2	1 1	1 2	1 1	1 1	1 1	1 1	1 1	2 2	1 2	2 2	1 1	1 1	1 1	1 1	1 2	1 1	1 2	1 1	1 2	1 2	1 2	1 2	1 2	1 1	1 2	1 1	1 1	1 1	1 2	1 2	1 1	1 2	2 2	1 2	1 2	1 1	1 1	2 2	1 2	1 1	1 2	1 2	1 2	2 2	0 0	1 2	1 2	2 2	1 1	2 2	1 1	1 1	2 2	1 1	1 2	2 2	1 1	1 1	1 1	1 2	0 0	1 2	1 1	1 2	1 1	2 2	1 1	1 1	1 2	1 1	1 1	1 2	1 1	1 1	1 1	2 2	1 1	1 2	1 2	1 2	1 2	1 1	1 2	1 2	1 2	1 2	1 2	2 2	1 2	1 2	1 2	1 2	1 1	2 2	1 1	1 1	1 1	1 1	1 2	1 1	2 2	1 1	1 1	1 2	1 2	1 2	1 2	1 2	1 1	1 2	1 1	1 2	1 1	1 2	1 1	1 2	1 2	2 2	1 1	1 2	2 2	1 1	1 1	1 1	1 2	1 1	1 1	1 1	1 2	1 2	1 2	1 1	1 1	1 2	1 2	2 2	1 1	1 2	1 1	1 1	1 1	1 2	1 1	2 2	1 1	1 1	1 2	1 2	1 1	0 0	1 1	1 1	1 1	1 1	1 1	0 0	1 1	1 2	2 2	2 2	1 2	1 2	1 1	1 2	1 2	1 1	1 2	1 2	1 2	2 2	1 1	1 1	1 2	1 2	1 2	1 2	0 0	1 2	1 1	1 2	1 1	1 2	1 2	1 2	2 2	1 1	1 1	2 2	1 2	1 2	1 1	1 1	1 1	1 1	1 2	1 2	1 2	1 1	1 1	1 2	1 1	1 2	1 1	1 1	1 2	1 1	1 1	1 1	1 2	1 1	2 2	1 1	1 2	2 2	1 1	1 1	1 1	1 2	1 2	1 2	1 2	1 2	1 2	1 2	1 2	1 1	1 1	1 2	1 1	2 2	1 2	1 2	1 1	1 2	1 1	1 1	1 1	1 1	1 1	1 2	1 1	1 2	1 2	1 2	0 0	1 1	1 1	2 2	1 2	1 1	1 1	1 1	1 2	1 2	1 2	1 1	1 2	1 2	1 2	1 1	1 1	1 2	1 2	2 2	1 2	2 2	2 2	1 2	1 2	1 2	1 1	1 1	1 1	1 1	1 2	1 1	1 1	1 2	1 2	1 2	1 2	1 2	1 1	1 1	1 2	1 1	1 2	1 2	1 2	1 2	1 2	1 1	2 2	1 1	1 2	1 2	1 2	1 2	1 1	1 2	1 2	2 2	1 2	1 1	0 0	1 1	1 1	0 0	2 2	1 2	1 2	1 1	2 2	1 2	1 2	1 1	1 2	1 1	1 1	1 1	1 2	1 1	1 1	1 1	1 1	1 2	1 2	1 1	1 2	1 2	1 1	1 2	1 1	1 2	1 1	1 1	1 2	1 2	1 2	1 2	1 1	1 1	1 2	0 0	1 2	1 2	1 2	1 1	1 1	2 2	1 2	1 2	1 2	2 2	2 2	1 2	2 2	1 2	1 1	1 1	1 1	1 1	1 2	2 2	1 2	1 2	1 2	1 2	1 2	2 2	1 1	1 1	1 1	1 2	1 2	1 1	1 1	1 1	1 1	1 2	1 2	2 2	1 2	1 2	1 2	1 1	1 1	1 2	1 1	1 1	1 1	1 2	1 1	1 2	1 1	1 2	1 2	1 2	1 2	1 1	1 1	1 2	1 1	1 1	1 2	0 0	1 2	1 1	1 2	1 2	1 2	1 2	1 1	1 1	1 1	1 2	1 1	1 2	2 2	1 1	1 2	0 0	1 1	1 2	1 1	1 2	1 1	1 2	2 2	1 2	1 2	1 1	2 2	1 1	1 1	1 1	1 1	2 2	1 1	1 2	1 2	1 2	1 2	1 2	1 2	1 2	1 2	1 1	1 2	2 2	1 2	1 2	2 2	1 2	0 0	1 2	1 1	2 2	1 2	1 1	1 2	1 2	1 1	1 1	1 1	1 2	1 2	1 2	1 2	0 0	1 1	1 2	2 2	1 2	1 1	1 1	1 1	1 2	1 1	1 1	2 2	1 1	1 2	1 1	1 2	0 0	1 2	2 2	2 2	1 1	1 1	0 0	1 2	1 2	1 1	1 1	1 2	1 2	2 2	1 1	1 1	1 2	1 1	1 2	1 2	1 2	1 2	1 2	1 2	1 2	1 2	1 1	1 1	2 2	1 2	1 1	1 1	1 2	0 0	1 1	0 0	1 1	1 2	1 1	1 2	1 2	1 1	2 2	1 1	1 1	2 2	1 2	1 2	1 1	1 1	1 2	1 1	2 2	1 1	1 2	1 1	1 2	0 0	1 1	1 2	2 2	1 1	1 1	1 2	1 2	1 1	1 1	1 2	1 1	1 2	1 2	1 2	1 2	1 2	1 2	1 2	1 2	1 2	1 1	1 1	1 2	2 2	1 1	1 2	1 2	1 2	1 2	1 2	1 1	1 2	1 1	1 2	2 2	1 1	1 2	1 1	1 2	1 1	2 2	1 1	1 2	1 2	1 2	1 2	1 2	1 2	1 2	1 2	1 1	2 2	1 1	1 1	1 1	1 2	1 2	2 2	1 1	1 2	2 2	1 2	1 2	1 1	1 2	1 1	1 1	1 1	1 1	1 2	1 1	1 2	1 2	1 2	1 2	2 2	1 2	1 2	1 2	2 2	1 2	1 2	1 2	1 1	2 2	1 2	1 1	1 1	1 2	1 2	1 2	1 1	1 2	1 1	2 2	1 1	1 1	1 2	1 2	1 2	1 1	1 1	1 1	1 2	2 2	1 2	1 2	1 2	1 1	1 2	1 2	1 1	1 2	1 1	1 1	1 1	1 2	1 2	1 2	1 1	1 1	1 2	1 2	1 2	1 2	1 1	1 2	1 1	1 1	1 1	1 1	1 1	2 2	1 2	1 2	1 2	1 2	1 2	1 2	1 1	1 2	1 2	1 2	1 1	1 2	1 1	1 2	1 2	1 1	1 2	1 1	1 2	1 1	1 2	1 2	1 2	2 2	1 2	1 1	1 2	1 2	1 1	1 2	1 2	1 2	1 1	1 2	0 0	1 2	1 2	1 2	1 1	2 2	1 2	1 1	1 2	1 2	1 2	1 2	1 1	1 1	1 2	1 1	1 1	1 1	1 1	2 2	1 2	1 1	1 2	1 2	1 1	1 2	1 2	1 1	1 1	1 2	1 1	1 1	1 1	1 2	1 2	1 2	1 1	1 2	1 1	1 1	1 2	1 1	1 2	1 2	2 2	1 1	1 2	2 2	0 0	1 2	1 2	1 2	1 2	1 1	1 2	1 2	1 2	1 1	1 1	1 2	1 2	1 2	1 1	1 1	2 2	1 2	1 2	1 2	1 2	1 2	1 1	1 1	1 2	1 2	0 0	1 1	1 1	1 2	1 2	1 2	1 2	1 1	1 2	1 2	1 2	1 2	2 2	1 2	1 2	1 2	0 0	1 1	1 1	1 1	1 2	1 1	1 1	1 2	1 1	1 1	1 1	1 2	1 2	1 1	2 2	2 2	1 2	1 2	1 1	1 1	1 1	1 1	0 0	2 2	0 0	1 1	1 2	1 2	1 2	1 2	2 2	2 2	1 2	1 2	1 2	2 2	0 0	1 1	1 2	1 1	1 1	1 1	1 2	1 1	1 1	1 1	1 2	1 2	1 1	1 1	1 2	1 1	1 1	1 1	1 2	2 2	2 2	0 0	1 1	1 2	1 1	1 2	2 2	1 1	1 2	1 2	1 1	1 1	1 2	1 2	1 1	1 1	1 1	2 2	1 2	1 1	1 1	1 1	2 2	1 2	1 2	1 2	1 2	1 1	1 1	1 2	2 2	1 1	1 1	2 2	1 2	2 2	2 2	1 2	1 2	2 2	1 1	1 2	1 1	0 0	1 2	1 1	1 2	1 2	1 2	1 1	1 1	1 2	1 2	2 2	2 2	1 1	1 1	1 1	1 2	1 1	1 2	1 2	1 2	0 0	1 1	1 2	1 2	1 1	1 2	2 2	1 2	1 1	1 2	1 2	1 2	1 2	2 2	1 1	1 2	1 1	1 1	0 0	1 2	1 2	1 2	1 1	1 1	1 2	1 1	1 1	1 2	1 1	1 1	1 2	1 2	1 1	1 1	1 1	1 1	1 2	1 2	1 2	1 1	1 1	1 2	1 2	1 1	1 1	1 2	1 1	1 2	1 1	1 1	1 2	1 1	1 2	1 1	1 2	1 2	1 1	1 1	1 2	1 2	2 2	1 2	1 2	1 2	1 1	1 2	1 2	1 1	1 1	1 2	1 1	1 1	1 1	1 2	2 2	1 1	1 2	1 1	1 1	1 1	1 1	1 1	1 2	2 2	1 1	1 2	1 1	1 2	1 2	1 1	1 1	1 2	1 2	1 2	1 2	1 1	1 1	1 2	1 1	1 2	1 1	1 2	1 1	2 2	1 2	0 0	1 2	1 2	2 2	1 1	1 2	1 2	1 2	1 1	1 1	1 2	1 2	1 2	1 1	1 2	1 1	1 2	1 2	1 1	1 2	1 2	1 1	1 2	1 2	1 1	1 1	1 1	1 1	1 1	0 0	1 1	1 1	1 1	1 1	1 1	1 1	0 0	1 2	1 1	1 2	1 1	1 1	1 2	1 1	1 2	1 2	1 2	1 2	1 2	1 1	1 1	1 1	1 2	1 2	1 1	1 1	1 2	1 1	1 1	1 2	1 2	2 2	1 1	1 1	1 2	1 2	1 2	1 1	1 2	1 2	1 2	1 1	1 2	1 2	0 0	1 2	1 2	2 2	1 2	1 1	1 2	1 2	1 1	1 2	2 2	1 2	1 1	1 1	1 2	1 2	1 2	1 2	1 1	1 1	2 2	1 2	1 2	1 1	1 1	1 1	1 1	1 2	1 1	1 1	1 2	1 2	1 1	1 2	1 2	1 2	1 1	1 2	1 2	1 1	1 1	1 1	1 2	1 2	1 2	0 0	1 1	1 2	1 2	1 2	1 1	1 1	1 1	1 1	1 2	2 2	1 2	1 1	1 2	2 2	1 2	1 1	1 2	1 1	2 2	1 2	1 2	2 2	1 1	1 1	1 2	1 1	1 1	1 1	1 1	1 2	1 1	2 2	1 1	2 2	2 2	1 2	1 1	1 2	1 1	1 1	1 2	1 2	1 2	1 1	1 1	1 2	2 2	1 1	1 1	1 1	1 2	1 2	1 1	1 1	1 2	1 2	1 2	1 1	1 2	1 2	1 1	1 2	1 1	1 2	1 1	1 2	1 2	1 1	1 1	1 2	1 1	1 1	1 1	2 2	1 1	1 1	1 1	1 1	1 2	1 2	1 2	1 2	1 2	1 2	1 1	1 1	1 2	1 2	1 2	1 2	1 1	1 2	1 1	1 2	1 2	1 1	1 2	1 2	1 2	1 2	1 2	1 2	1 1	1 1	1 1	1 1	2 2	1 1	0 0	1 1	1 1	1 1	1 1	1 1	2 2	1 2	1 2	1 2	1 2	1 2	1 2	1 2	1 2	1 2	1 2	1 1	1 2	1 1	0 0	1 2	1 2	1 1	1 1	1 2	1 2	1 1	1 2	1 1	2 2	1 2	1 1	1 1	2 2	1 2	1 2	0 0	1 1	1 1	1 1	1 2	1 2	1 2	1 1	1 2	1 1	1 1	1 1	1 1	1 1	1 2	1 2	1 2	1 2	1 2	1 2	1 2	1 2	1 1	1 1	1 1	1 2	1 1	1 1	1 1	1 1	1 2	1 1	1 2	1 1	1 1	1 2	1 2	2 2	1 2	2 2	1 1	1 1	1 1	2 2	1 1	1 1	1 1	1 1	1 2	1 1	2 2	1 2	0 0	1 2	1 2	2 2	1 2	1 2	1 1	1 1	1 1	1 2	2 2	1 1	1 1	1 1	1 1	1 2	1 2	1 1	1 2	1 1	1 2	1 1	1 1	1 2	1 2	1 1	1 2	0 0	1 2	1 2	1 1	1 1	1 2	1 1	1 1	1 1	1 2	1 1	1 1	2 2	1 2	1 1	1 1	1 1	1 1	1 2	2 2	1 1	1 1	1 2	1 2	1 1	1 1	1 1	1 1	1 2	1 2	1 2	0 0	2 2	1 1	1 2	1 1	1 2	1 2	1 1	1 1	1 1	1 1	1 2	1 2	1 2	1 1	1 1	1 1	1 1	1 2	1 1	1 1	1 1	1 1	1 2	1 1	1 2	1 1	1 2	1 1	1 1	1 2	1 1	1 1	0 0	1 1	1 1	1 1	2 2	2 2	1 1	1 1	2 2	1 2	1 1	1 1	2 2	1 2	1 2	1 1	1 2	1 2	1 2	2 2	1 2	1 1	1 1	1 1	1 2	1 1	1 2	1 1	1 1	1 2	1 2	1 1	1 2	1 2	1 2	1 2	1 2	1 1	1 1	1 1	2 2	1 2	1 2	1 2	1 1	2 2	1 2	1 2	0 0	1 2	1 1	2 2	1 2	1 2	1 2	1 1	1 2	1 2	1 1	1 1	1 2	1 2	2 2	1 1	1 1	1 2	1 2	1 1	2 2	1 1	1 2	1 1	1 1	1 2	2 2	1 1	1 2	1 2	1 2	1 2	2 2	1 1	1 2	1 1	1 1	2 2	1 2	1 1	2 2	1 2	1 2	1 2	1 1	1 1	1 2	1 2	1 2	2 2	1 1	1 2	1 2	1 1	1 1	1 1	1 2	1 2	0 0	1 1	1 1	1 1	1 2	1 1	1 2	1 2	1 2	2 2	1 2	1 2	0 0	1 1	1 2	1 1	1 2	1 1	1 1	1 2	1 1	1 1	1 1	1 1	1 2	2 2	1 1	1 1	1 1	1 2	1 2	1 1	1 1	1 2	0 0	2 2	1 2	1 2	1 1	1 2	1 2	1 1	1 2	1 2	0 0	1 2	1 1	1 2	1 1	1 2	1 2	1 2	1 1	1 1	1 1	1 1	1 2	1 2	1 1	1 1	1 2	1 1	2 2	1 1	1 1	1 1	1 1	1 1	1 2	1 1	1 2	0 0	1 1	1 1	1 1	1 1	1 1	1 2	2 2	1 1	1 2	1 2	1 2	1 2	2 2	2 2	1 2	1 1	1 2	1 1	1 2	1 1	1 2	1 2	1 1	1 2	1 2	2 2	1 2	1 1	0 0	1 1	1 1	1 2	1 2	1 2	1 1	1 2	1 1	1 1	2 2	1 1	1 2	1 2	1 2	1 1	1 2	1 2	2 2	1 1	1 2	1 2	1 2	1 1	1 2	1 1	1 1	2 2	1 1	1 2	1 2	1 2	1 1	1 2	1 1	1 2	1 2	1 2	1 2	1 1	0 0	2 2	1 2	1 1	1 2	1 2	1 2	1 1	1 2	1 2	1 2	1 2	1 2	1 2	1 2	1 1	2 2	1 2	1 1	1 1	1 2	1 2	1 2	2 2	1 1	1 1	1 2	1 2	1 1	1 1	1 2	2 2	2 2	1 2	1 1	1 2	1 1	2 2	1 2	1 2	1 1	1 2	1 2	1 1	2 2	1 2	1 2	1 1	2 2	1 1	1 2	1 1	1 2	1 2	1 1	1 1	1 1	1 1	1 1	1 2	1 1	1 2	1 1	1 2	2 2	1 2	2 2	1 1	1 2	1 2	1 2	1 2	1 2	1 2	1 1	1 2	1 1	1 1	0 0	1 2	1 2	1 1	1 1	1 1	2 2	2 2	1 2	0 0	1 2	1 2	1 2	1 2	1 1	1 2	1 1	1 2	1 1	1 2	1 2	0 0	1 1	1 1	1 2	1 2	1 2	1 2	1 1	1 2	1 2	1 2	1 2	1 2	1 1	1 1	1 1	1 2	1 2	1 1	1 1	1 2	2 2	1 2	2 2	2 2	1 2	1 2	1 2	1 2	1 1	1 1	1 1	1 1	1 1	1 1	1 1	1 2	2 2	1 1	1 2	1 2	2 2	1 1	1 2	1 1	1 1	1 1	1 2	1 2	1 2	0 0	1 2	2 2	1 1	1 2	1 2	1 2	1 2	1 1	1 2	1 2	1 2	1 2	1 2	2 2	1 2	1 2	1 2	1 2	1 2	1 1	1 2	1 1	1 1	1 2	1 2	1 1	1 2	1 2	2 2	1 1	1 2	2 2	1 2	1 1	1 1	1 2	1 2	1 1	1 1	2 2	1 2	1 2	1 1	1 1	1 1	1 1	1 1	1 2	1 1	1 2	1 2	1 2	1 2	1 2	2 2	1 1	1 1	1 2	1 1	1 2	1 1	1 2	1 1	1 2	1 1	1 2	1 2	1 1	1 2	1 2	1 2	0 0	1 2	1 2	1 1	1 1	1 1	1 2	1 2	1 1	1 2	1 1	1 2	1 1	1 2	1 1	2 2	1 1	1 1	1 1	1 2	1 2	1 1	1 1	1 2	1 2	1 1	1 2	1 2	1 1	1 2	1 1	1 1	1 2	1 1	1 2	1 1	1 2	1 2	1 1	1 1	1 2	1 1	1 2	1 2	1 1	1 2	1 1	1 1	1 1	1 1	1 2	1 2	1 1	1 2	2 2	1 2	1 1	1 1	1 2	1 1	1 1	1 1	1 2	1 2	2 2	1 1	1 2	1 2	1 1	1 2	1 1	1 1	2 2	1 2	2 2	2 2	1 1	1 2	2 2	1 1	1 2	1 1	1 2	1 2	1 2	2 2	1 1	1 2	0 0	1 1	2 2	1 2	1 2	1 2	1 1	1 2	1 2	2 2	1 2	1 1	2 2	1 2	1 2	1 1	1 1	2 2	1 1	1 2	1 1	1 2	1 2	1 2	0 0	1 2	1 1	1 1	1 1	1 2	1 1	1 2	1 2	1 1	1 2	1 1	1 2	1 2	1 2	1 1	1 1	1 2	1 2	1 2	1 1	1 1	1 1	1 1	1 1	1 1	1 2	1 1	2 2	1 1	1 2	1 2	1 1	1 1	1 2	1 2	1 1	1 2	1 1	1 2	1 2	1 2	1 2	0 0	1 2	2 2	1 1	1 1	1 2	1 1	1 2	1 1	1 2	1 1	1 2	1 1	1 1	1 1	1 2	1 1	1 1	1 2	1 2	1 1	1 1	1 2	1 1	1 2	2 2	1 2	2 2	1 1	2 2	1 2	1 1	1 2	1 1	2 2	1 1	1 2	1 1	1 1	1 2	1 1	1 2	2 2	2 2	1 2	1 2	1 1	2 2	1 2	1 2	1 2	1 2	1 1	1 2	1 2	1 2	1 2	1 2	1 2	1 1	2 2	1 2	1 2	1 2	1 1	1 2	1 1	1 1	2 2	1 2	1 2	1 2	1 2	1 1	1 2	1 1	2 2	1 2	1 2	1 2	1 2	1 2	1 2	1 2	1 1	0 0	1 2	1 1	1 1	1 2	1 2	2 2	1 1	1 2	1 2	1 2	1 2	1 1	1 1	2 2	1 1	2 2	1 1	1 1	0 0	1 1	1 2	2 2	1 2	2 2	1 2	1 2	1 2	1 2	2 2	1 2	2 2	1 2	1 2	1 2	1 1	1 1	1 1	1 1	1 2	2 2	1 2	1 1	1 1	1 2	1 2	1 2	2 2	1 1	1 1	1 2	1 1	2 2	1 2	1 2	1 1	1 1	1 1	1 1	1 1	1 1	1 2	1 2	1 2	1 1	1 1	0 0	1 2	1 2	1 2	1 2	1 2	1 1	1 1	1 1	1 2	0 0	1 1	1 1	1 2	1 1	1 1	1 2	1 1	0 0	1 2	1 2	1 1	1 1	1 1	1 2	1 2	0 0	1 2	1 1	2 2	1 2	1 1	1 2	1 1	1 2	1 1	1 2	1 2	1 2	1 2	1 1	1 1	1 2	1 2	1 1	2 2	1 1	1 1	1 1	1 2	1 2	1 1	1 2	1 2	1 1	1 2	1 2	1 1	2 2	1 2	1 2	1 2	1 1	1 2	1 1	1 2	1 2	1 1	1 2	1 2	1 2	1 2	1 2	1 2	1 1	2 2	1 1	1 1	1 1	1 2	1 2	1 2	1 2	1 1	1 2	1 2	1 2	1 1	1 2	1 2	2 2	1 1	1 1	1 2	1 1	1 2	1 2	1 2	1 1	1 1	1 2	2 2	1 1	1 1	1 1	2 2	1 2	1 2	1 2	1 1	1 2	2 2	1 1	1 2	2 2	1 2	1 1	1 2	1 1	1 2	1 2	1 2	1 2	1 1	1 1	1 1	1 2	1 2	1 2	1 1	1 1	1 1	1 1	1 2	1 2	1 2	1 2	1 1	2 2	1 1	1 1	1 2	0 0	1 2	1 1	1 2	1 1	1 2	1 2	1 2	1 2	1 1	1 1	1 1	1 1	1 2	1 1	1 2	1 1	1 2	1 2	1 1	1 1	1 2	1 1	1 1	2 2	1 2	1 2	1 2	1 1	1 2	1 2	1 1	2 2	2 2	1 1	1 1	1 2	1 2	1 1	2 2	0 0	1 2	1 2	1 1	1 2	1 1	1 2	2 2	1 1	1 2	2 2	1 1	1 1	2 2	1 1	1 1	1 2	1 2	1 1	1 1	1 1	1 1	1 1	1 1	1 1	1 2	1 1	1 1	2 2	1 2	1 2	1 1	1 1	1 1	1 2	1 2	2 2	1 1	1 1	1 2	1 2	1 1	1 2	0 0	1 2	1 2	2 2	1 1	1 1	1 1	1 1	1 2	1 2	1 2	1 2	1 1	1 2	1 2	1 2	1 2	1 1	1 2	0 0	1 2	1 1	1 2	1 1	1 1	1 2	1 1	1 2	1 2	1 2	2 2	1 2	1 2	1 2	1 1	1 1	1 2	1 1	2 2	1 2	1 2	1 2	1 1	2 2	1 2	1 1	1 2	1 2	1 2	1 2	1 1	2 2	1 1	1 2	1 2	1 1	1 2	1 2	1 1	1 2	1 2	1 2	2 2	1 2	1 1	0 0	1 1	1 1	1 1	1 2	1 2	1 2	1 2	1 2	2 2	1 2	1 2	1 2	1 1	1 1	0 0	1 1	1 2	1 2	1 2	1 1	1 1	1 2	2 2	1 2	1 2	2 2	1 2	1 1	1 1	1 1	1 1	1 1	2 2	1 2	1 1	1 2	1 1	1 2	1 2	1 2	1 1	1 1	1 1	1 2	1 2	1 1	1 1	1 2	1 2	1 1	1 1	1 2	1 1	1 2	1 2	1 2	1 2	1 2	1 2	1 2	1 1	2 2	1 2	1 1	1 2	1 1	1 2	1 2	1 2	1 2	1 2	0 0	1 1	1 1	1 2	1 1	1 1	1 2	1 1	1 1	0 0	1 1	1 1	1 1	1 1	0 0	1 1	1 2	1 1	1 1	1 2	1 2	0 0	2 2	1 1	1 1	2 2	1 1	2 2	2 2	1 1	1 2	1 2	1 2	1 1	1 2	0 0	1 2	1 1	1 1	1 1	1 1	1 2	1 1	1 1	1 1	1 2	1 2	1 2	1 2	1 2	1 1	1 2	1 1	1 2	1 2	1 2	1 2	1 2	1 1	1 2	1 1	1 2	1 2	1 1	1 1	1 1	1 1	1 1	2 2	1 2	1 1	1 1	1 2	1 1	1 2	1 1	2 2	1 1	1 1	1 1	1 1	1 1	1 2	1 1	1 2	1 1	1 1	1 1	1 1	1 2	1 2	1 1	1 1	1 2	1 1	1 1	1 2	1 1	2 2	1 1	1 2	1 2	1 1	1 2	1 1	1 2	1 2	1 2	1 2	1 1	1 1	1 1	1 1	1 2	1 2	1 2	1 1	1 2	1 2	1 2	1 2	1 1	1 1	1 2	1 2	1 2	1 2	1 2	1 2	1 2	1 1	1 2	1 2	1 1	1 1	2 2	1 2	1 2	1 2	1 2	2 2	1 2	1 2	1 2	2 2	1 1	1 1	1 2	1 2	1 1	1 2	1 2	1 1	1 1	1 2	1 1	1 1	1 2	1 2	1 1	1 2	1 2	0 0	1 1	1 1	1 1	1 2	0 0	1 1	1 2	2 2	1 2	1 1	1 1	1 1	1 2	0 0	1 2	1 2	1 2	1 1	1 1	1 2	1 1	1 1	1 1	1 1	1 1	1 2	1 2	1 2	1 2	2 2	1 1	1 2	1 2	1 2	2 2	1 2	1 2	1 1	1 2	2 2	1 2	1 1	1 2	1 2	1 1	1 1	1 2	1 2	1 2	1 1	0 0	1 1	1 2	2 2	1 2	2 2	1 1	1 1	1 1	1 2	1 2	1 2	1 1	1 1	1 1	1 1	1 1	1 1	1 2	1 2	1 2	1 1	1 2	1 2	1 1	1 1	1 2	1 2	1 1	1 1	1 2	1 2	1 1	2 2	1 2	1 2	1 2	1 2	1 2	1 2	1 2	1 1	1 2	1 2	1 2	1 1	1 2	1 1	1 2	1 2	1 1	1 2	1 1	1 2	1 2	1 1	2 2	1 2	1 1	1 1	1 2	1 2	1 1	1 1	1 1	2 2	1 2	1 2	1 1	1 2	1 1	1 1	1 1	1 2	1 2	1 2	1 2	1 1	1 2	1 1	1 1	1 2	1 2	1 2	1 1	1 1	1 2	1 2	1 1	1 2	1 1	1 1	1 1	1 1	1 1	1 2	0 0	2 2	1 1	1 2	2 2	1 2	1 2	1 2	1 1	2 2	1 1	1 1	1 1	1 2	0 0	1 2	1 1	1 1	1 2	1 2	1 2	1 1	1 2	1 2	1 1	1 1	2 2	0 0	1 2	1 1	1 2	1 1	1 2	1 1	1 2	1 2	1 2	2 2	1 2	1 2	2 2	2 2	1 2	1 1	1 2	1 1	2 2	1 2	1 2	1 1	1 2	1 2	1 2	1 1	1 2	1 2	1 2	1 1	1 1	1 2	1 2	1 2	1 1	1 2	1 1	1 2	1 1	1 2	1 1	1 1	1 2	1 2	1 2	0 0	1 2	1 2	1 2	1 2	1 2	1 2	1 2	1 1	2 2	1 1	1 1	2 2	1 1	0 0	1 2	2 2	1 1	1 2	1 2	1 1	1 2	1 1	1 1	1 1	1 2	1 2	2 2	1 1	1 1	1 1	1 2	2 2	1 2	1 2	1 2	1 1	1 1	1 2	1 1	0 0	1 1	1 2	1 1	1 1	1 2	1 2	1 2	1 1	1 2	1 1	2 2	1 1	1 2	1 2	1 2	1 2	1 2	1 1	1 1	1 2	2 2	1 2	2 2	1 1	1 2	1 1	2 2	1 2	1 1	1 1	1 2	1 1	1 1	1 1	1 1	1 1	2 2	1 1	2 2	1 2	0 0	1 1	1 2	1 1	1 1	1 2	1 1	2 2	1 2	1 1	1 1	0 0	1 1	1 2	1 1	1 1	1 1	1 1	1 2	1 1	1 2	1 1	1 1	1 2	1 1	1 1	1 1	1 1	1 2	1 1	2 2	1 2	1 2	1 1	1 2	1 2	1 2	1 2	1 2	1 2	1 1	1 1	1 2	1 2	1 2	1 2	1 2	1 1	1 1	2 2	1 1	1 1	1 1	1 1	1 2	1 2	1 2	1 1	1 2	1 2	1 2	1 2	1 2	1 2	1 1	1 2	1 1	1 2	1 1	1 1	1 1	1 2	1 2	1 1	1 1	1 1	2 2	1 1	1 1	1 1	1 1	1 2	1 2	1 1	1 2	1 1	1 2	1 2	1 2	1 1	1 2	1 1	1 2	1 1	1 2	1 1	1 1	1 2	1 2	1 2	1 1	1 2	1 1	1 2	1 2	1 2	1 2	1 1	1 2	1 1	1 1	2 2	1 1	1 1	1 1	1 2	1 1	1 1	1 2	1 2	1 2	1 1	2 2	1 1	1 1	1 2	1 1	2 2	1 1	1 2	1 1	1 1	1 1	2 2	1 2	1 1	1 1	1 2	1 2	1 1	1 1	2 2	1 1	1 2	1 2	1 1	1 2	1 1	1 1	1 2	0 0	1 2	1 2	1 2	1 1	1 2	1 1	2 2	1 1	1 2	1 2	2 2	1 2	1 1	1 2	1 1	1 1	1 2	1 2	1 2	2 2	1 2	1 1	1 1	1 1	1 2	1 2	1 1	1 1	2 2	1 2	1 2	1 2	1 1	1 2	1 2	1 2	1 1	1 1	1 2	1 2	1 2	1 1	1 2	1 2	1 2	1 2	1 2	1 2	1 1	1 1	1 2	1 2	2 2	1 1	1 1	1 1	1 2	1 2	1 1	1 2	1 1	1 1	1 1	1 2	1 2	1 2	1 2	1 1	0 0	1 2	1 1	1 2	1 2	1 1	1 2	1 1	1 1	1 2	1 1	1 1	1 1	1 2	1 2	1 2	2 2	1 1	1 2	1 1	1 1	1 2	1 1	1 2	1 1	1 2	2 2	1 2	1 2	1 1	1 2	1 1	1 1	1 1	1 2	1 1	1 1	1 1	1 2	1 1	1 1	1 2	1 1	1 1	0 0	2 2	0 0	1 2	1 1	1 1	1 2	1 2	2 2	1 2	1 2	1 1	1 2	1 2	1 1	2 2	1 2	1 1	1 2	1 1	1 1	1 2	1 2	1 2	1 2	1 2	2 2	1 2	1 1	1 2	1 2	0 0	1 2	1 2	1 2	2 2	1 2	1 1	1 2	1 2	0 0	1 2	1 2	1 1	1 1	1 2	1 1	2 2	2 2	1 2	2 2	1 1	1 1	1 1	1 1	1 1	1 2	1 1	1 2	1 2	1 1	1 2	1 1	1 1	1 2	1 1	1 1	1 1	1 1	1 2	1 1	1 1	2 2	1 2	1 1	1 1	1 2	1 1	1 2	1 1	1 2	1 1	1 2	1 1	1 1	1 2	1 1	1 2	2 2	2 2	2 2	2 2	1 1	1 2	1 2	1 2	1 1	1 2	1 1	2 2	1 1	1 1	1 1	1 2	1 2	1 1	1 1	1 1	2 2	1 2	1 2	1 2	1 2	1 1	1 2	1 1	1 2	1 1	1 1	1 1	1 1	1 1	1 1	1 2	1 2	1 2	1 2	1 2	2 2	1 1	1 1	1 2	2 2	1 2	1 1	1 2	1 2	1 2	1 1	1 1	1 2	1 1	1 2	1 2	1 2	2 2	1 2	1 2	1 1	1 1	1 2	1 2	1 1	2 2	1 2	1 2	2 2	1 1	1 2	1 2	1 2	1 1	1 2	1 2	1 1	1 2	1 2	1 2	2 2	1 2	1 1	1 1	1 2	1 2	1 2	1 1	1 1	1 2	1 2	1 1	1 1	1 1	1 1	1 1	1 2	1 1	1 1	1 2	1 2	1 1	1 2	1 2	1 1	1 1	1 1	2 2	1 1	1 2	1 1	2 2	1 2	1 2	1 1	1 1	1 1	1 1	1 2	1 2	1 2	1 1	1 2	2 2	1 1	1 2	1 2	1 2	2 2	1 1	1 2	1 2	1 2	1 2	1 1	1 2	1 1	1 1	1 1	1 1	2 2	1 2	1 2	1 1	1 1	1 2	1 2	1 1	1 2	1 2	1 1	1 2	2 2	1 1	1 1	1 1	1 2	1 2	2 2	1 2	1 2	2 2	1 1	1 1	1 1	1 2	1 1	1 2	2 2	1 2	1 2	2 2	1 2	1 1	1 1	1 2	1 2	1 1	1 2	1 2	1 2	2 2	1 1	2 2	1 1	1 2	1 1	0 0	1 2	1 1	1 1	2 2	1 2	1 1	1 2	1 2	1 2	1 2	1 1	1 2	1 1	1 2	1 2	1 1	1 1	1 1	1 2	2 2	1 1	1 1	1 1	1 1	1 1	1 1	1 2	1 2	1 2	2 2	1 2	1 1	1 2	1 2	2 2	1 1	1 1	1 2	1 2	1 1	1 2	1 1	2 2	1 2	1 2	2 2	1 2	1 1	1 1	1 2	1 2	1 2	1 1	1 1	1 2	1 1	1 1	1 1	1 2	1 2	1 1	2 2	1 1	1 2	1 2	1 1	1 1	1 1	1 2	1 2	1 1	1 2	1 2	1 2	2 2	1 2	1 1	1 2	1 2	1 2	1 1	1 1	1 2	1 1	1 2	1 2	1 2	1 1	1 2	1 1	2 2	1 2	1 2	1 1	1 2	1 2	1 2	1 2	2 2	1 2	1 2	1 1	1 1	1 2	1 1	1 1	1 2	1 2	1 1	1 1	1 1	1 2	1 2	1 2	1 2	1 1	1 1	1 1	1 2	1 1	1 1	1 2	1 2	1 2	1 2	1 2	1 1	1 2	1 2	1 2	1 1	1 2	1 1	1 2	1 1	1 2	1 2	1 2	1 2	1 2	1 1	1 2	1 1	1 2	1 1	1 2	2 2	1 2	1 2	2 2	1 1	0 0	1 2	1 2	0 0	2 2	1 2	1 1	1 2	1 2	1 2	1 1	1 1	2 2	1 2	1 1	1 1	1 1	1 1	1 1	1 1	1 2	1 2	1 1	1 2	2 2	1 2	1 2	1 2	1 2	1 2	0 0	1 1	1 2	1 1	1 1	1 1	1 2	2 2	2 2	1 2	1 2	1 2	1 1	0 0	1 2	1 2	1 1	1 1	1 1	1 1	0 0	1 1	1 2	1 1	1 1	0 0	1 1	1 2	1 2	1 1	1 2	1 1	1 2	1 1	1 1	1 2	1 2	1 1	1 1	1 1	1 2	1 2	1 1	1 1	1 2	1 2	1 2	1 2	2 2	2 2	1 2	1 2	1 1	1 2	1 2	1 2	1 1	1 1	1 1	1 2	2 2	1 1	1 2	1 2	1 1	1 2	1 2	1 2	1 1	1 1	2 2	1 2	1 1	1 2	2 2	1 1	1 1	1 2	1 1	1 1	1 2	1 2	2 2	1 2	1 2	2 2	1 2	2 2	1 2	1 1	1 2	1 1	1 1	1 1	1 2	0 0	1 1	1 1	1 2	1 2	1 2	1 2	1 1	1 2	2 2	0 0	2 2	1 2	1 1	1 2	1 2	1 2	1 1	1 2	1 1	1 1	2 2	1 1	2 2	1 1	1 2	1 2	1 2	1 2	1 2	0 0	1 1	1 2	2 2	1 1	1 1	1 2	1 1	1 1	2 2	1 1	1 2	1 2	1 2	1 1	1 2	1 1	1 1	1 1	1 1	2 2	1 2	1 2	1 2	1 2	1 1	1 2	2 2	1 2	2 2	1 1	1 1	1 1	1 1	1 1	1 2	1 2	1 1	1 2	1 1	1 1	1 1	1 2	1 1	1 2	1 2	1 2	1 1	1 2	1 1	1 2	1 2	1 2	1 1	1 2	1 1	1 2	1 1	1 2	1 1	1 1	1 1	1 2	2 2	1 1	1 2	1 1	1 1	1 2	1 1	1 1	2 2	2 2	1 1	1 2	1 2	1 1	1 2	2 2	1 2	1 2	1 1	1 2	1 2	1 1	1 2	1 1	1 2	1 1	2 2	1 1	1 1	1 2	1 2	1 1	2 2	2 2	1 1	1 1	1 1	1 2	1 2	1 1	1 2	1 2	1 2	1 1	1 1	1 1	1 2	1 1	1 1	1 1	1 2	1 1	1 1	1 1	1 1	1 2	1 1	1 1	1 2	1 2	1 1	1 2	1 1	1 2	1 2	1 2	1 1	1 1	1 2	1 2	1 2	2 2	1 2	1 2	1 2	2 2	1 2	1 2	1 1	2 2	0 0	1 1	1 1	1 1	2 2	1 2	1 2	1 2	1 2	1 1	1 2	1 1	1 1	1 1	1 1	1 1	1 1	1 1	1 1	1 1	1 2	1 1	1 1	1 1	1 1	2 2	1 2	1 1	2 2	1 2	1 2	2 2	0 0	1 2	1 2	1 2	1 2	1 1	1 2	1 2	1 2	2 2	1 1	1 1	1 2	1 2	1 1	2 2	0 0	1 1	1 1	1 2	1 2	1 1	1 1	1 1	1 2	1 2	2 2	1 2	1 2	1 1	1 1	1 1	1 2	1 2	1 1	1 2	1 2	1 2	1 2	1 2	0 0	1 2	1 2	1 2	1 2	1 2	1 1	1 2	1 1	1 2	1 2	1 2	1 1	1 2	1 2	1 1	1 1	1 1	1 1	2 2	1 2	1 2	1 2	1 1	1 2	1 1	1 1	1 2	1 2	1 2	1 2	1 1	2 2	1 1	1 1	1 2	1 2	1 2	2 2	1 1	1 2	2 2	1 1	1 2	1 1	1 1	1 1	2 2	1 1	1 1	1 2	2 2	2 2	2 2	1 1	1 1	2 2	1 2	2 2	1 2	1 1	1 1	1 1	1 1	1 1	1 1	1 1	1 1	1 2	1 1	1 1	1 1	1 1	1 1	1 1	1 1	1 2	1 1	1 2	1 2	1 1	2 2	1 2	1 2	1 1	1 1	1 1	1 1	1 2	1 2	1 1	1 1	1 2	1 2	1 1	1 2	1 2	2 2	1 2	1 2	1 1	1 2	1 1	1 1	1 1	1 2	1 1	1 2	1 2	2 2	1 1	1 2	1 1	1 1	1 2	2 2	1 1	2 2	1 2	1 1	1 1	2 2	2 2	1 1	1 1	1 2	1 2	1 2	1 1	1 2	0 0	1 1	0 0	1 1	1 2	1 1	1 2	1 2	1 2	1 1	2 2	1 2	1 1	2 2	1 2	1 2	1 2	1 2	1 1	1 2	2 2	0 0	1 1	1 1	1 1	1 1	1 1	1 2	1 1	1 2	0 0	1 2	1 2	1 2	1 2	1 2	1 1	1 1	1 2	1 1	2 2	1 1	1 1	1 1	1 1	1 1	1 2	1 2	1 2	1 1	1 2	1 2	2 2	1 2	1 2	1 2	2 2	1 1	1 2	1 2	1 1	1 1	1 1	2 2	1 1	2 2	1 1	1 1	1 2	1 1	1 1	1 2	1 1	1 1	1 2	1 2	1 2	1 1	1 2	1 2	1 1	1 2	1 1	1 1	2 2	1 1	1 1	1 1	1 2	1 1	1 1	1 2	1 2	1 2	1 1	1 1	1 1	1 1	2 2	1 2	1 1	2 2	1 1	1 1	1 1	1 2	1 2	1 2	2 2	1 1	2 2	2 2	1 1	1 1	1 2	1 2	1 1	1 2	1 1	2 2	1 1	1 2	1 1	1 1	1 1	1 2	0 0	1 1	1 2	1 2	1 1	1 2	1 1	0 0	1 2	1 1	1 1	2 2	1 2	1 2	1 1	1 1	1 1	1 2	1 1	1 2	1 2	1 2	1 1	0 0	1 2	1 2	1 2	1 2	1 2	1 1	1 1	1 1	1 1	2 2	1 2	1 2	1 1	0 0	1 1	1 2	2 2	1 1	1 2	1 2	1 1	1 1	1 1	1 2	1 1	1 1	1 2	1 2	1 2	1 1	2 2	1 2	1 2	1 2	1 2	1 2	1 1	1 1	1 2	2 2	1 1	1 1	1 1	1 2	1 2	1 2	2 2	1 2	0 0	1 2	1 2	1 1	1 2	1 2	1 1	1 2	1 2	1 2	1 2	1 2	1 2	2 2	1 2	1 1	1 2	1 2	1 2	1 1	1 1	1 2	1 2	1 2	1 2	1 1	1 1	1 1	1 2	1 1	1 1	2 2	1 2	1 1	2 2	2 2	2 2	1 2	1 1	1 1	1 1	1 2	1 1	1 2	1 1	1 1	0 0	1 2	1 2	1 1	1 1	1 2	1 1	1 2	1 1	1 2	1 1	1 2	1 1	1 2	1 2	1 2	1 2	1 2	1 1	1 1	1 2	1 1	1 1	1 2	1 2	1 1	1 1	1 2	1 2	1 2	1 1	1 2	0 0	1 1	1 2	1 2	1 2	1 2	1 2	1 2	1 2	1 1	1 2	1 1	1 1	1 1	1 2	1 2	1 2	1 1	2 2	1 2	2 2	1 2	2 2	1 2	1 2	1 2	1 2	1 2	1 1	1 2	1 2	2 2	1 2	2 2	1 2	1 2	1 1	1 2	1 2	1 2	1 2	1 1	1 2	1 1	2 2	1 1	1 1	1 2	1 2	1 2	1 1	1 2	1 2	2 2	1 2	1 1	1 1	1 2	1 1	1 2	1 1	1 2	2 2	1 2	2 2	1 2	1 2	1 1	1 1	1 2	1 2	1 1	1 2	1 2	1 1	1 2	1 1	2 2	1 2	1 2	1 1	1 2	2 2	1 2	1 1	0 0	1 2	1 1	0 0	1 2	1 1	1 2	1 2	1 1	1 2	1 2	1 1	2 2	1 1	1 2	1 1	1 2	1 1	1 2	1 2	2 2	1 1	1 2	1 1	1 2	1 2	1 1	1 2	1 2	1 2	1 2	2 2	1 1	2 2	1 2	1 2	1 1	1 2	1 2	1 2	1 2	1 1	0 0	1 1	1 2	1 1	1 1	1 1	2 2	1 1	1 2	1 2	1 2	1 1	1 1	1 1	1 2	1 1	1 2	1 2	1 2	1 2	1 1	1 1	0 0	1 1	1 1	1 1	1 2	1 1	1 1	1 2	1 2	1 1	1 1	1 1	1 1	1 1	1 1	1 2	1 2	1 1	1 1	1 2	1 1	2 2	1 1	1 2	1 2	1 1	0 0	1 2	2 2	0 0	1 1	1 2	2 2	1 1	1 2	1 1	1 1	1 1	1 1	1 2	1 2	2 2	1 1	0 0	1 1	1 1	1 2	1 1	1 1	1 2	2 2	1 1	1 1	0 0	1 1	1 2	1 1	1 1	1 1	1 1	1 2	1 2	1 2	1 1	1 2	1 2	1 1	1 2	1 1	1 1	1 2	1 2	1 1	1 1	1 1	1 2	1 2	1 1	1 2	1 1	1 2	2 2	1 1	1 2	1 2	1 1	1 2	1 1	1 1	1 2	1 1	1 2	1 1	1 2	1 2	1 1	1 2	1 1	1 1	1 2	1 1	1 1	1 1	1 1	1 2	1 2	1 2	0 0	1 1	1 2	1 2	1 2	1 1	1 2	2 2	1 1	1 2	1 1	1 2	1 2	0 0	1 2	1 2	1 1	2 2	1 2	1 1	1 2	1 1	1 2	1 2	1 2	1 2	1 1	1 2	1 2	1 2	1 2	0 0	1 2	1 2	1 2	1 1	1 2	1 2	1 1	1 1	1 1	1 1	1 1	1 1	1 1	0 0	1 1	1 1	1 2	1 2	1 2	2 2	1 1	1 2	1 1	0 0	0 0	1 1	1 1	1 2	1 1	1 2	1 1	1 2	1 1	1 1	1 2	1 2	1 2	1 2	2 2	1 1	1 2	1 1	1 1	1 2	1 2	1 2	1 1	1 1	1 2	1 1	1 1	1 2	1 2	1 2	1 1	1 2	1 2	1 2	2 2	1 1	1 1	1 2	1 1	1 2	1 2	1 2	2 2	1 1	1 2	1 2	1 2	1 2	1 1	1 2	1 1	1 1	0 0	1 1	2 2	1 2	2 2	1 2	0 0	1 2	2 2	1 2	1 1	1 2	1 2	1 2	1 1	1 2	1 2	1 1	2 2	1 1	1 2	1 2	1 2	1 1	1 2	1 1	2 2	1 1	1 1	1 1	1 2	1 1	1 1	1 1	1 1	1 1	1 2	1 1	1 1	1 1	2 2	1 1	1 2	1 2	0 0	1 1	1 2	2 2	1 1	1 2	1 1	1 2	1 1	1 1	1 2	1 2	1 1	1 2	1 2	1 1	1 2	1 1	2 2	1 1	1 2	1 2	1 2	1 1	1 2	2 2	1 1	1 1	1 2	1 2	1 2	1 2	1 1	1 1	1 1	1 2	1 1	1 1	1 1	1 2	1 2	1 1	1 2	1 2	1 1	1 1	1 1	1 1	1 1	1 1	1 2	1 1	1 2	1 1	2 2	1 1	1 1	1 1	1 2	1 2	1 1	1 2	1 2	1 2	1 2	1 1	1 1	1 2	1 2	2 2	2 2	1 1	1 1	1 2	1 2	1 2	2 2	1 2	1 1	1 2	0 0	1 1	1 2	2 2	1 1	1 1	0 0	1 2	0 0	1 1	1 1	1 1	1 2	2 2	1 1	1 2	1 2	1 2	1 1	1 1	1 2	1 1	1 2	1 2	1 2	1 2	1 2	1 1	1 2	1 2	1 2	2 2	1 1	1 1	0 0	1 1	1 1	2 2	1 2	1 1	1 2	1 2	1 1	1 1	1 2	1 1	1 1	2 2	1 1	1 1	1 2	2 2	1 2	1 1	1 2	1 1	1 2	1 1	1 2	1 2	1 1	1 1	2 2	1 2	1 2	1 1	1 2	1 1	1 2	1 1	1 1	1 1	1 2	1 2	1 2	1 2	1 1	1 1	2 2	1 1	1 2	1 1	1 1	1 2	1 1	1 2	1 1	1 1	1 2	1 1	1 1	1 1	1 2	1 2	1 2	1 1	1 2	1 1	1 2	1 1	1 1	1 2	1 2	1 2	2 2	1 2	1 1	1 2	0 0	1 1	0 0	1 1	1 2	1 1	1 2	1 2	1 1	1 1	1 1	1 1	1 2	1 2	1 1	1 2	1 1	1 2	1 2	1 2	0 0	1 1	2 2	1 1	1 1	1 2	1 1	1 2	1 2	1 1	1 2	1 1	1 2	1 2	2 2	1 1	1 2	1 1	1 1	2 2	1 1	2 2	2 2	1 2	1 2	1 1	1 2	1 1	1 2	1 1	1 1	1 2	1 1	1 1	1 1	1 1	1 1	2 2	1 1	1 2	1 1	1 1	1 1	1 1	1 2	1 2	1 1	1 1	1 2	2 2	2 2	1 1	1 2	1 2	1 2	1 1	1 1	2 2	1 1	1 1	1 1	1 2	1 2	1 2	1 2	1 2	1 1	0 0	1 1	1 1	1 1	1 1	1 2	1 2	1 1	1 2	1 1	1 2	0 0	1 2	1 1	1 1	1 1	2 2	1 2	1 1	1 1	1 1	1 1	1 2	0 0
1	011.x1.GQI119	800.x1.GQI122	400.x1.GQI122	0	0	1 1	1 1	1 1	1 2	1 2	1 1	1 1	1 2	1 1	1 1	1 1	1 2	1 2	2 2	1 1	1 1	1 2	1 1	1 1	1 2	1 2	2 2	1 1	1 2	1 1	1 2	1 1	1 2	1 2	1 2	1 1	1 1	1 1	1 2	1 1	1 1	1 1	1 2	1 1	2 2	1 1	0 0	1 1	1 2	1 1	1 1	1 1	2 2	1 1	1 2	1 2	1 1	1 1	1 2	1 2	2 2	2 2	1 1	2 2	1 1	1 2	1 2	1 1	1 2	1 1	1 2	1 1	1 2	1 2	1 2	1 1	1 2	1 1	1 2	1 2	1 2	1 2	1 2	1 2	1 2	1 1	1 1	1 1	2 2	1 2	1 1	1 1	0 0	1 2	1 2	2 2	1 2	1 1	2 2	1 2	1 1	1 1	1 2	1 2	2 2	1 2	1 2	1 2	0 0	1 2	1 1	1 1	1 1	1 1	1 1	1 2	1 2	1 1	1 2	0 0	1 1	1 1	1 1	1 1	1 1	1 2	1 2	1 1	1 1	1 2	1 1	1 1	1 2	1 2	1 2	1 2	1 1	1 2	1 2	1 1	1 1	1 1	1 2	1 2	0 0	1 2	1 2	1 1	2 2	1 1	1 1	1 1	2 2	1 2	1 1	1 1	1 1	1 2	1 2	1 1	2 2	1 2	1 1	1 1	1 2	1 2	1 2	1 1	2 2	2 2	1 1	1 2	1 1	2 2	1 1	1 2	1 1	0 0	0 0	1 1	2 2	1 2	1 1	2 2	1 1	1 2	1 1	1 1	1 1	2 2	2 2	1 2	1 1	2 2	1 1	1 1	1 1	1 2	1 1	1 1	1 1	2 2	2 2	1 1	1 1	1 1	1 2	1 2	1 1	1 2	1 2	1 1	1 1	1 1	1 2	1 1	2 2	1 2	1 1	0 0	1 1	1 2	1 1	2 2	1 1	1 2	1 1	1 1	1 1	1 2	1 1	1 2	1 2	1 2	1 1	1 1	1 1	1 2	1 2	1 1	1 1	1 1	1 2	1 2	1 1	1 2	2 2	1 1	1 2	1 1	1 1	1 1	1 2	2 2	0 0	1 1	1 1	1 1	1 1	1 2	1 1	1 2	1 2	1 1	1 1	1 1	1 1	1 1	0 0	1 2	1 1	1 1	1 1	1 1	1 1	1 2	1 1	1 1	1 1	2 2	1 2	1 2	1 1	1 1	1 2	1 2	1 2	1 2	1 1	1 1	1 1	2 2	1 1	1 2	1 2	0 0	1 2	0 0	1 2	2 2	1 2	1 2	0 0	1 2	1 2	1 1	1 1	1 2	1 2	1 1	1 2	1 2	1 2	1 2	1 1	1 1	1 2	1 1	1 1	2 2	1 1	1 2	1 2	1 1	1 1	0 0	1 2	1 2	1 2	1 2	1 2	1 2	1 1	1 2	1 1	1 1	1 2	1 2	1 1	1 2	1 1	1 2	1 2	1 2	1 2	1 1	1 2	1 2	1 1	0 0	1 1	1 1	1 1	1 1	1 1	1 1	1 1	1 1	1 2	1 1	1 2	1 2	1 2	1 1	1 2	1 2	1 2	1 2	1 2	1 2	1 2	2 2	1 2	0 0	1 1	1 1	1 1	1 2	1 1	1 1	1 2	1 1	1 1	1 1	2 2	0 0	2 2	1 2	1 2	1 2	1 2	2 2	1 2	1 1	1 1	1 1	0 0	1 2	1 2	1 1	2 2	1 1	2 2	1 2	1 1	1 2	1 2	2 2	1 1	0 0	1 2	1 2	1 1	1 2	1 2	1 1	1 2	0 0	1 1	1 1	1 1	1 1	1 2	1 1	0 0	1 2	1 1	1 2	0 0	1 2	1 1	1 1	1 2	1 2	1 2	1 1	2 2	1 1	1 1	1 2	1 1	1 1	1 2	1 1	1 1	1 2	1 2	2 2	1 2	0 0	1 2	1 1	1 2	1 2	1 2	1 1	1 1	1 1	1 2	0 0	1 2	1 1	1 1	0 0	1 2	1 2	0 0	1 2	1 1	1 1	1 1	1 2	1 1	1 2	1 1	1 1	1 1	1 1	1 2	1 2	1 2	1 1	1 2	1 2	1 1	1 1	1 1	1 1	2 2	1 1	1 2	1 1	1 1	1 1	0 0	1 1	0 0	1 2	0 0	1 1	1 1	1 1	1 1	1 2	1 1	2 2	1 2	1 2	1 2	1 2	1 1	1 1	2 2	1 1	2 2	1 2	1 1	1 2	1 2	2 2	1 1	1 1	1 1	1 1	0 0	1 1	1 2	1 2	1 1	1 1	2 2	1 1	1 2	1 1	1 2	2 2	1 2	1 2	2 2	1 2	1 1	1 2	1 2	2 2	1 2	1 1	1 2	1 1	1 2	1 1	1 2	2 2	2 2	0 0	1 1	1 2	1 1	1 1	1 2	1 2	1 1	1 1	1 2	2 2	1 2	1 1	1 2	1 2	1 1	1 1	1 1	1 2	1 1	1 2	1 2	1 1	0 0	2 2	0 0	1 1	1 2	1 1	1 2	1 1	1 1	1 2	1 2	1 2	2 2	1 2	1 2	1 1	1 1	1 2	1 2	1 2	1 1	1 1	1 1	1 1	2 2	1 2	1 2	1 1	1 2	0 0	1 2	1 2	1 2	1 2	1 2	1 1	1 1	1 2	1 1	1 2	1 1	1 2	1 1	1 2	1 1	2 2	1 1	1 2	1 1	1 2	0 0	1 1	1 2	1 2	1 1	1 1	1 2	1 1	1 2	0 0	1 1	1 1	1 1	1 2	1 1	1 2	1 2	0 0	1 1	2 2	1 2	2 2	1 2	1 1	1 1	1 1	1 1	1 1	1 2	1 1	1 1	1 1	0 0	1 1	1 1	1 1	1 2	1 1	2 2	1 1	1 1	1 2	1 2	1 1	1 2	1 1	1 1	1 1	1 2	2 2	1 2	1 1	1 1	1 2	1 2	1 1	1 2	1 2	1 1	1 2	1 2	1 1	1 1	1 1	1 2	1 2	0 0	1 1	0 0	1 2	1 1	1 1	1 2	1 1	1 1	1 1	1 2	1 2	1 1	1 1	1 2	1 2	1 2	1 2	1 2	1 2	1 2	1 1	1 1	1 1	1 2	1 1	1 2	1 2	1 1	1 1	1 2	1 1	1 2	2 2	1 1	2 2	1 1	1 1	1 1	1 1	1 2	1 2	1 1	1 1	1 1	1 1	1 1	1 2	2 2	1 2	1 2	1 2	1 2	1 2	1 2	1 1	1 1	1 2	1 1	1 1	1 2	1 2	0 0	1 1	1 2	1 1	1 2	1 2	0 0	1 1	1 1	1 2	1 2	1 2	1 2	2 2	1 2	1 2	1 2	1 2	1 1	1 2	1 1	1 2	1 1	1 1	1 2	1 2	1 2	1 2	0 0	1 1	1 1	1 2	1 2	1 2	1 1	1 2	1 1	1 1	1 1	1 2	1 1	2 2	1 2	2 2	1 1	1 2	1 1	1 1	1 1	2 2	2 2	1 2	2 2	1 2	1 1	1 2	1 2	1 1	1 1	1 2	1 2	1 1	1 2	1 1	1 2	1 1	1 2	1 1	1 2	1 1	1 2	1 1	1 2	1 2	1 1	1 2	1 2	1 2	1 2	1 1	1 2	1 2	1 2	1 1	0 0	1 2	0 0	2 2	1 2	1 2	0 0	1 2	1 2	1 1	1 1	0 0	1 2	2 2	1 1	2 2	1 2	1 2	1 2	1 1	1 1	1 1	1 1	2 2	1 2	1 1	1 2	1 2	1 1	2 2	1 2	1 1	1 2	1 2	1 1	1 1	1 1	1 1	2 2	1 2	2 2	1 2	0 0	1 1	1 1	1 2	1 1	1 1	1 1	1 2	1 2	1 2	2 2	1 2	1 1	1 2	1 1	1 1	2 2	2 2	1 2	2 2	1 2	1 1	1 2	1 2	2 2	1 2	1 2	1 1	1 2	1 1	1 2	0 0	1 2	1 2	1 1	1 2	1 2	2 2	1 1	1 1	1 2	1 1	1 2	1 2	1 2	1 1	1 1	1 2	1 2	1 1	1 2	2 2	1 2	1 2	1 2	1 2	1 2	1 1	1 1	1 1	1 2	1 2	2 2	1 1	1 1	1 1	1 1	1 1	1 2	1 1	1 1	1 2	1 1	1 2	1 1	1 1	1 1	1 1	1 2	1 1	0 0	1 1	1 2	1 2	1 2	1 2	1 2	1 1	1 2	1 1	1 2	1 1	1 1	1 2	1 1	1 2	1 1	1 1	2 2	1 2	1 2	1 2	1 1	1 1	1 1	1 2	1 2	1 2	1 1	1 2	1 2	1 1	1 2	1 2	1 1	1 1	1 1	1 2	0 0	1 1	1 1	1 2	1 1	1 2	1 2	1 1	1 1	1 2	1 1	1 2	0 0	1 2	1 2	1 1	1 2	1 1	1 2	1 2	2 2	1 1	2 2	1 2	1 2	1 2	1 1	2 2	1 1	1 1	2 2	1 1	1 2	1 2	1 2	1 2	1 1	1 1	1 2	1 2	2 2	2 2	1 1	1 2	1 1	1 2	1 2	1 2	1 1	1 1	1 2	1 1	1 2	2 2	1 2	1 1	0 0	1 2	1 1	1 2	2 2	0 0	1 1	1 1	0 0	1 2	1 1	1 1	1 1	1 1	1 1	1 1	1 1	1 1	1 1	1 1	1 1	1 2	1 2	1 1	2 2	0 0	1 1	1 2	1 2	1 2	1 2	1 2	1 1	1 1	2 2	1 1	2 2	1 2	2 2	1 1	1 2	1 1	1 1	1 1	1 2	1 1	1 2	1 1	2 2	1 1	0 0	1 2	1 2	1 1	1 2	2 2	1 1	1 2	2 2	1 2	1 2	1 1	1 2	1 1	0 0	1 1	1 2	1 2	1 1	1 2	1 1	1 1	1 1	1 1	1 2	2 2	1 2	1 2	1 2	1 2	1 2	1 2	1 1	0 0	1 1	1 2	0 0	1 2	1 2	1 2	2 2	1 2	1 1	2 2	2 2	1 2	1 1	1 2	2 2	1 1	1 2	1 2	1 1	1 2	0 0	0 0	1 2	1 2	1 2	1 2	1 2	1 1	1 2	1 1	1 1	1 2	1 1	1 2	1 2	1 2	1 1	1 1	1 2	1 2	1 1	1 1	1 2	1 2	1 1	1 1	1 1	1 2	1 2	1 2	1 2	1 1	1 1	1 2	1 2	1 2	1 2	1 2	0 0	2 2	2 2	1 2	1 2	1 2	1 1	2 2	2 2	1 1	1 1	1 2	1 1	2 2	2 2	1 2	1 1	1 2	1 2	0 0	2 2	1 2	1 2	0 0	1 2	2 2	1 1	1 2	1 1	1 1	1 1	1 2	1 1	2 2	2 2	1 1	1 1	1 2	2 2	1 1	1 2	1 2	1 1	1 1	1 2	1 1	2 2	2 2	1 2	1 1	1 2	2 2	1 1	1 1	1 1	1 1	1 2	1 1	1 1	2 2	1 1	1 2	1 1	1 2	1 2	1 2	1 1	1 2	1 1	1 1	1 1	1 1	2 2	1 1	1 1	1 1	1 1	1 2	1 1	1 2	2 2	1 2	1 1	1 1	1 1	1 1	1 1	1 1	1 2	1 1	1 1	1 1	1 1	1 2	2 2	1 1	1 1	1 2	1 2	1 2	1 2	1 2	1 2	2 2	1 1	1 1	1 1	1 2	1 1	1 2	1 1	1 2	1 1	1 1	1 1	1 1	1 2	1 1	1 1	1 1	1 1	2 2	1 2	1 1	1 2	1 1	1 1	1 1	1 1	1 2	1 2	1 2	1 2	1 1	1 1	1 1	1 2	1 1	1 2	1 1	1 2	1 1	1 1	1 2	1 2	1 2	1 2	1 2	2 2	0 0	1 2	1 2	1 1	1 1	2 2	2 2	1 1	1 2	2 2	1 2	1 2	1 2	2 2	1 2	1 2	2 2	1 1	1 1	1 1	1 1	1 2	1 1	1 2	1 1	1 1	1 2	1 2	1 1	0 0	1 1	1 1	1 1	1 2	2 2	1 2	1 1	1 1	1 1	1 1	1 1	1 2	1 1	2 2	1 2	1 2	1 1	1 1	1 1	1 2	1 2	1 1	2 2	1 2	1 1	1 2	1 2	1 1	2 2	1 1	1 2	1 1	1 1	1 2	1 1	1 2	1 1	1 2	1 1	1 1	1 2	1 1	1 2	2 2	1 1	2 2	1 1	1 1	1 2	1 2	1 1	1 1	1 2	1 2	1 1	1 1	1 1	0 0	0 0	1 2	1 1	1 1	1 2	1 2	1 2	1 2	0 0	1 1	1 2	1 2	1 2	1 2	1 1	1 1	1 1	1 2	1 1	1 1	1 1	2 2	1 1	1 2	2 2	1 1	1 1	1 1	1 1	1 1	1 1	1 1	2 2	1 1	2 2	1 2	1 1	1 1	1 2	0 0	1 2	1 1	1 2	1 2	1 2	1 2	1 2	1 2	1 1	1 1	1 2	1 1	1 2	1 1	1 1	1 2	1 1	1 1	1 1	1 1	2 2	1 1	1 1	1 1	1 2	1 1	0 0	1 1	1 1	1 1	1 1	1 2	1 2	1 2	1 2	1 1	1 2	1 2	1 2	1 1	1 2	1 2	1 2	1 2	1 1	1 2	1 1	1 2	1 1	2 2	1 2	1 2	1 2	1 1	1 2	1 1	1 2	1 2	1 2	1 2	1 2	1 2	1 2	2 2	0 0	1 1	0 0	1 2	1 1	1 2	1 1	1 2	1 1	1 2	0 0	1 1	1 2	1 2	2 2	1 1	1 2	1 1	2 2	1 2	0 0	1 2	2 2	1 2	1 2	2 2	1 1	1 2	1 2	1 1	1 1	1 1	0 0	1 2	1 1	1 1	1 2	1 2	1 1	1 1	1 1	1 1	2 2	1 2	1 1	1 2	1 2	1 1	2 2	1 2	1 2	1 2	1 1	1 1	2 2	1 1	1 2	1 1	1 1	2 2	2 2	1 2	1 2	1 2	1 1	1 1	1 1	1 1	1 2	0 0	0 0	1 2	1 1	1 2	2 2	1 2	0 0	1 1	2 2	2 2	2 2	0 0	0 0	1 1	1 2	1 1	1 2	1 2	1 1	0 0	1 2	1 1	1 1	1 1	1 2	1 1	1 1	1 2	1 1	1 2	1 1	1 2	1 1	1 1	0 0	1 1	1 2	0 0	1 1	1 1	1 2	1 1	2 2	1 1	1 2	1 1	1 1	1 1	2 2	1 1	1 2	1 2	1 1	1 1	1 1	1 2	1 1	1 1	1 2	2 2	1 1	1 1	1 1	1 2	1 2	1 2	1 1	2 2	1 1	1 1	1 2	1 2	1 1	1 1	1 1	1 1	1 1	1 2	1 2	1 2	1 2	1 1	1 1	1 2	1 1	1 1	1 1	1 1	2 2	1 1	1 1	1 1	0 0	1 1	1 2	2 2	1 2	1 2	1 1	1 2	1 1	1 2	2 2	1 1	2 2	1 1	1 1	1 2	1 2	1 2	1 2	1 2	1 1	2 2	1 1	1 1	1 1	1 1	1 1	1 1	1 2	1 2	1 2	1 2	2 2	1 2	1 1	1 1	1 1	1 2	1 2	1 2	1 2	0 0	2 2	1 2	2 2	1 1	1 2	1 1	2 2	1 2	1 2	1 2	1 2	0 0	2 2	0 0	0 0	1 1	1 1	1 2	1 2	2 2	0 0	1 2	2 2	1 2	1 1	1 2	1 2	2 2	1 2	1 1	1 2	2 2	1 1	1 2	1 1	1 2	1 1	1 1	1 2	1 1	1 2	1 1	2 2	1 2	2 2	1 2	1 2	1 2	2 2	1 2	1 2	1 1	2 2	1 1	1 2	1 1	1 2	1 2	1 2	1 1	1 2	0 0	0 0	1 1	1 1	1 1	1 2	2 2	1 2	1 2	0 0	1 1	1 1	1 1	1 1	1 1	1 2	1 1	1 1	1 1	1 1	1 2	1 1	1 1	1 1	1 1	1 2	1 1	1 2	2 2	1 1	1 2	1 1	1 2	2 2	2 2	1 1	1 2	1 1	1 1	1 1	2 2	1 2	1 1	1 2	0 0	1 1	1 1	1 2	1 2	1 1	1 1	1 2	1 2	1 1	1 1	1 1	1 2	1 1	1 2	1 2	1 1	1 2	1 1	1 2	1 2	1 2	0 0	1 2	1 2	1 2	1 1	1 1	1 2	1 2	2 2	1 2	1 1	1 2	1 1	1 1	1 1	1 1	1 2	1 1	1 2	2 2	1 1	1 1	1 1	1 2	2 2	1 1	1 2	2 2	2 2	1 1	1 1	1 1	1 2	0 0	2 2	1 2	1 1	1 1	1 1	1 1	1 1	0 0	1 2	1 2	1 1	1 1	1 2	0 0	1 2	1 2	0 0	1 2	1 1	1 1	1 1	1 2	1 2	1 1	0 0	1 1	1 1	1 1	1 1	1 1	1 1	1 1	1 1	1 2	1 1	1 2	1 2	0 0	2 2	1 2	1 2	0 0	1 1	1 1	1 1	2 2	1 1	1 1	1 2	1 1	1 1	1 2	1 2	1 2	1 1	1 1	1 1	1 2	2 2	1 1	1 2	1 1	1 2	1 2	1 1	1 2	1 2	1 1	1 2	1 2	1 2	2 2	1 1	1 1	1 2	1 1	1 2	1 2	1 2	1 1	1 1	1 2	1 2	1 1	1 1	2 2	1 2	1 1	1 1	1 2	1 1	1 2	1 1	1 1	1 2	2 2	1 1	1 1	1 1	1 2	1 1	1 2	1 2	1 1	1 1	2 2	1 2	1 2	1 2	1 2	1 1	1 1	1 1	1 1	1 2	1 1	1 1	2 2	1 1	1 2	1 1	1 2	2 2	2 2	1 2	1 2	1 2	1 1	1 1	1 1	2 2	2 2	1 1	2 2	1 1	2 2	1 1	1 1	2 2	1 1	1 1	1 1	1 1	1 2	1 1	1 2	2 2	1 2	1 1	1 2	1 2	1 1	1 2	1 2	0 0	1 1	1 2	1 1	1 2	1 1	1 1	1 2	1 2	1 1	2 2	1 1	1 2	1 1	1 1	1 1	1 1	1 1	1 2	1 2	1 2	1 2	1 1	0 0	1 1	1 1	1 2	1 2	1 1	2 2	1 1	2 2	1 2	1 1	2 2	1 2	1 1	1 2	1 1	1 2	2 2	1 1	1 1	1 2	1 1	1 1	1 1	1 2	0 0	1 2	1 1	1 2	1 2	1 1	1 1	1 2	1 2	2 2	1 1	1 1	1 1	1 2	1 2	1 1	1 2	1 1	1 1	1 1	1 2	1 1	2 2	0 0	1 2	1 1	1 1	0 0	1 2	1 1	1 2	1 1	1 2	1 1	1 1	1 2	1 1	2 2	1 1	1 1	1 2	1 2	1 1	1 1	1 1	1 2	2 2	2 2	1 2	0 0	2 2	1 1	0 0	1 1	1 1	1 2	1 1	1 1	1 2	1 2	1 2	0 0	1 1	1 2	1 1	1 2	1 1	1 1	0 0	0 0	1 2	1 2	1 1	1 1	1 2	1 2	1 1	1 1	2 2	1 2	1 1	1 2	1 2	1 2	1 1	1 1	1 1	1 1	1 1	1 2	1 2	1 1	1 1	0 0	1 2	1 2	2 2	1 1	1 1	2 2	1 2	1 2	1 2	1 1	1 2	1 2	1 1	0 0	0 0	1 2	1 2	0 0	1 1	1 2	1 2	0 0	1 1	2 2	1 1	1 2	1 1	2 2	1 1	1 2	2 2	1 2	1 1	1 1	1 1	1 2	1 1	1 2	1 2	1 1	1 1	2 2	1 1	1 2	2 2	1 2	1 1	0 0	1 2	1 1	1 1	1 1	2 2	1 2	1 1	1 2	1 1	2 2	1 2	0 0	2 2	1 1	0 0	1 1	1 1	1 2	1 1	1 1	1 1	1 2	1 2	1 2	1 2	1 1	1 1	1 2	1 2	1 2	1 1	1 1	1 2	1 1	1 1	1 1	1 2	1 1	1 2	1 1	1 1	1 1	1 2	1 1	0 0	1 2	1 1	1 2	1 1	1 1	1 1	1 1	1 1	1 1	1 2	1 1	1 2	1 2	1 1	1 2	1 1	1 2	1 1	1 1	1 2	1 1	1 1	1 2	1 1	1 1	1 2	1 1	1 1	1 2	1 2	1 2	1 2	1 1	1 2	1 2	1 1	0 0	1 2	1 2	1 1	1 2	1 2	2 2	1 1	1 1	1 1	1 1	0 0	1 2	1 1	1 1	2 2	1 1	1 1	2 2	1 2	1 2	2 2	1 1	1 2	1 2	1 2	1 2	1 2	1 2	1 1	2 2	1 2	1 1	1 2	1 2	1 1	1 2	0 0	1 1	1 1	1 1	1 1	2 2	1 2	1 1	1 1	1 1	1 1	1 2	0 0	1 2	1 1	1 2	1 2	2 2	1 2	1 2	1 1	1 2	1 1	1 1	1 2	1 2	1 2	1 1	0 0	1 2	0 0	1 1	1 1	1 2	1 1	1 1	1 2	1 2	1 1	1 1	1 2	1 1	2 2	1 2	1 2	1 1	1 1	1 1	1 1	2 2	1 2	1 2	1 1	1 1	1 1	1 1	2 2	1 1	0 0	1 2	1 2	2 2	1 2	2 2	1 1	2 2	0 0	1 1	1 1	0 0	1 2	2 2	1 2	1 1	1 1	1 1	1 2	1 2	1 2	1 2	1 2	1 1	1 1	1 2	1 2	1 2	1 2	1 1	0 0	1 1	1 2	1 2	2 2	1 2	1 1	1 1	1 2	1 1	1 2	1 2	1 2	1 2	1 1	2 2	1 2	1 1	1 2	1 1	1 2	1 2	1 1	1 2	2 2	1 1	1 2	1 2	1 1	1 1	1 2	1 2	1 2	2 2	1 1	0 0	1 1	1 1	1 1	1 2	1 1	1 1	1 1	1 1	2 2	1 2	1 2	0 0	1 2	1 1	0 0	1 2	1 2	1 1	1 1	1 2	2 2	1 2	1 2	1 1	1 2	1 2	1 1	1 1	1 1	1 2	1 2	1 1	2 2	1 2	1 1	2 2	1 2	1 1	1 2	2 2	2 2	1 2	1 1	1 2	1 1	1 1	1 1	1 1	1 2	1 1	1 2	1 1	1 2	1 2	1 1	1 2	1 2	1 1	1 2	1 2	0 0	1 2	1 2	1 1	1 2	1 2	1 1	1 1	1 1	1 1	2 2	1 1	1 1	1 2	1 2	1 1	1 1	1 1	2 2	1 2	1 1	1 1	1 1	1 1	2 2	1 1	1 1	1 1	1 2	1 2	1 1	1 1	1 1	1 1	1 1	1 2	1 1	1 2	2 2	2 2	1 2	1 1	2 2	1 1	1 2	1 2	1 1	1 1	1 2	2 2	1 1	1 1	2 2	1 1	1 1	0 0	1 1	1 2	1 2	1 1	1 2	0 0	1 1	1 2	1 1	1 2	1 2	1 2	1 2	0 0	1 1	2 2	2 2	1 2	1 2	1 2	1 1	2 2	1 2	0 0	1 2	1 1	1 1	1 1	1 1	2 2	2 2	1 2	2 2	1 1	2 2	1 1	1 1	1 1	1 1	1 2	1 2	1 1	1 2	2 2	1 2	1 1	1 2	1 2	1 1	1 1	1 2	1 1	0 0	1 1	1 2	1 1	0 0	1 1	1 2	1 1	1 2	2 2	0 0	1 2	1 1	1 2	1 2	1 1	2 2	1 2	1 2	1 2	1 1	2 2	1 2	1 2	2 2	1 1	1 1	1 2	1 1	1 1	2 2	2 2	1 1	2 2	1 2	1 2	1 2	1 1	1 2	1 1	1 1	1 2	1 2	1 1	1 1	1 2	2 2	2 2	1 1	0 0	1 2	1 1	1 1	2 2	1 1	1 2	1 2	1 2	1 2	1 2	1 2	1 2	1 2	2 2	1 1	1 2	1 2	1 2	1 2	1 2	1 2	2 2	1 1	1 2	1 1	1 1	1 1	1 1	1 1	1 1	1 1	1 1	1 1	1 2	1 2	1 1	0 0	1 2	1 2	0 0	0 0	2 2	2 2	1 1	1 2	1 1	1 2	1 2	1 2	1 1	1 1	1 2	1 1	1 2	1 2	1 2	1 1	1 1	1 2	1 2	1 1	1 1	1 1	1 2	1 2	1 1	1 1	1 2	1 1	2 2	1 1	1 1	1 2	1 2	1 1	1 1	1 1	1 1	1 1	1 2	1 1	1 1	1 2	1 2	2 2	1 2	1 1	1 1	1 1	1 1	1 2	1 2	1 1	1 2	1 2	1 1	1 2	1 1	2 2	1 2	2 2	1 1	1 1	1 1	0 0	1 1	1 1	1 2	1 1	2 2	1 2	1 1	1 2	1 1	0 0	1 2	2 2	1 1	1 1	1 1	1 1	1 2	1 1	1 2	1 1	1 1	1 2	1 1	1 2	2 2	1 1	0 0	2 2	1 2	1 1	1 1	0 0	1 2	1 2	2 2	1 2	1 2	1 1	1 1	1 1	2 2	2 2	1 1	1 1	1 2	1 1	1 2	2 2	1 2	0 0	1 1	0 0	1 1	1 2	0 0	2 2	1 1	1 1	1 1	2 2	1 1	1 1	2 2	1 1	1 1	1 2	1 2	1 2	1 1	1 1	1 2	1 1	0 0	1 2	1 2	1 1	1 1	1 2	1 1	1 2	1 2	1 2	1 1	2 2	1 1	1 2	1 1	2 2	1 1	1 1	1 1	1 1	1 2	1 2	1 2	1 1	1 1	0 0	1 1	0 0	1 1	1 1	1 2	1 2	1 2	1 1	1 1	1 2	1 2	1 1	2 2	1 2	1 1	2 2	1 1	1 1	1 1	2 2	1 2	1 2	1 1	1 2	1 2	1 2	1 1	1 2	1 1	1 1	1 2	1 2	1 1	1 1	1 1	2 2	1 1	1 1	1 1	1 2	1 1	1 1	1 2	1 2	1 1	1 1	1 2	1 2	1 1	1 1	2 2	1 1	1 1	2 2	2 2	1 2	2 2	1 1	1 1	2 2	1 2	2 2	1 1	1 1	1 1	1 1	1 2	2 2	1 1	2 2	1 1	1 2	1 2	1 2	1 2	1 1	1 2	1 1	1 1	1 2	1 2	1 1	2 2	1 2	1 1	1 2	1 2	1 2	1 1	1 2	1 1	1 1	1 1	1 2	1 2	1 1	2 2	1 2	1 1	0 0	1 1	1 1	1 2	1 1	1 2	1 2	1 1	1 1	1 1	1 2	1 2	1 1	1 2	2 2	1 1	1 2	0 0	1 2	1 2	1 1	1 2	1 2	1 2	1 1	1 2	1 2	1 1	1 1	1 1	2 2	1 2	2 2	1 2	1 2	1 2	1 2	1 1	0 0	1 1	2 2	1 1	1 1	1 2	1 1	1 2	1 2	1 2	1 2	0 0	1 2	1 1	1 1	1 1	1 2	2 2	1 2	1 1	1 2	1 1	1 2	1 2	1 1	2 2	1 2	1 2	1 2	1 1	1 2	1 2	1 2	1 2	2 2	1 2	1 1	1 1	1 1	1 2	1 1	1 1	1 2	0 0	1 1	1 1	1 1	1 1	1 1	1 1	1 1	1 2	1 2	2 2	1 2	1 2	1 1	1 1	1 1	1 2	1 1	1 1	1 2	1 2	1 1	1 2	1 1	1 1	2 2	1 2	2 2	1 1	1 2	1 2	1 1	1 2	2 2	1 1	2 2	1 2	1 2	0 0	1 1	1 2	0 0	0 0	0 0	1 1	1 1	1 1	1 2	1 1	1 2	1 1	2 2	1 1	2 2	1 1	1 1	1 1	1 2	1 2	1 1	1 2	1 2	1 1	2 2	1 1	1 1	1 1	1 2	1 2	1 1	1 1	1 1	0 0	1 2	1 2	1 1	1 2	1 2	1 2	1 1	1 2	1 2	1 2	1 1	1 2	2 2	1 2	1 2	1 2	1 1	1 1	1 1	1 1	1 1	1 2	1 2	1 1	2 2	1 2	2 2	2 2	1 2	1 2	1 1	1 2	0 0	1 2	1 1	1 1	1 1	1 2	1 1	1 1	0 0	1 2	1 2	1 1	1 1	1 2	1 1	1 2	1 2	1 2	2 2	1 1	1 2	1 2	1 2	1 1	1 2	1 1	1 1	1 1	1 1	1 1	2 2	1 2	1 1	1 1	1 1	1 2	1 1	1 1	0 0	1 2	1 2	1 1	1 1	1 2	1 1	1 1	1 1	1 2	0 0	1 1	1 1	1 1	0 0	1 1	1 1	1 1	1 1	1 2	1 2	1 2	1 1	1 1	1 2	2 2	1 2	1 1	1 1	1 1	1 2	2 2	1 2	1 1	1 1	1 2	1 1	1 2	1 1	1 2	1 2	1 1	1 2	1 1	1 1	1 1	2 2	1 1	1 1	1 2	0 0	1 2	2 2	1 1	1 1	1 1	1 1	1 1	0 0	1 2	1 1	1 2	0 0	1 1	1 1	1 2	1 2	1 2	1 2	1 2	2 2	1 2	0 0	2 2	1 2	1 2	1 1	1 2	1 1	2 2	1 2	1 2	1 1	1 2	1 2	2 2	1 2	1 1	1 2	2 2	1 2	1 1	1 1	1 1	1 1	1 1	1 2	1 1	1 1	1 2	1 1	0 0	2 2	1 2	1 1	1 2	0 0	1 2	1 1	1 1	1 2	1 1	1 2	1 1	0 0	1 1	1 2	0 0	1 1	1 1	2 2	1 2	1 2	1 1	1 1	1 2	1 2	1 2	1 2	1 1	1 1	1 1	1 1	1 2	1 2	1 1	1 1	1 1	1 2	1 2	1 1	1 2	1 2	1 1	1 2	1 1	1 1	1 2	1 1	1 2	1 2	1 1	1 2	1 2	2 2	1 1	1 1	1 2	1 1	2 2	1 2	1 2	1 1	1 2	1 2	2 2	0 0	1 2	1 1	1 2	1 1	1 2	1 1	1 1	1 1	1 2	1 2	1 1	1 1	1 2	1 1	1 2	1 1	1 2	1 2	2 2	1 1	1 2	1 2	1 2	1 2	1 2	1 1	1 1	1 2	1 2	1 1	1 1	1 2	1 2	2 2	1 2	2 2	1 2	1 1	1 1	1 1	1 2	1 1	1 2	1 1	1 2	0 0	1 2	1 1	1 1	1 1	2 2	1 1	1 1	1 2	1 2	2 2	1 1	1 2	2 2	1 1	1 1	0 0	0 0	1 2	1 1	1 1	1 1	1 2	1 2	1 2	2 2	1 1	1 1	1 1	1 1	1 2	1 1	2 2	1 1	1 2	2 2	1 2	0 0	1 1	1 2	1 1	1 1	1 1	1 2	0 0	1 2	1 1	1 2	1 2	1 2	1 1	1 1	1 1	0 0	0 0	1 1	1 2	1 2	1 2	1 2	1 2	1 2	1 1	0 0	1 2	1 1	1 2	2 2	1 2	0 0	1 1	1 2	1 1	2 2	1 2	1 2	1 2	1 1	2 2	1 1	1 2	1 1	1 2	1 1	1 1	1 1	1 1	1 1	0 0	2 2	1 2	1 2	1 2	1 1	2 2	1 2	1 1	1 1	1 2	1 1	1 1	1 2	1 2	2 2	1 2	1 1	1 1	2 2	1 1	1 1	1 1	1 2	1 1	0 0	1 2	1 1	2 2	1 2	1 2	0 0	1 1	2 2	1 2	1 2	1 1	1 1	1 1	1 1	1 1	1 2	1 2	0 0	1 2	1 1	1 2	1 1	1 2	0 0	1 1	1 2	1 2	1 2	1 2	1 1	1 1	0 0	1 1	1 1	1 1	1 2	1 1	1 2	1 1	1 1	1 2	1 2	2 2	0 0	2 2	1 1	1 1	1 2	1 1	2 2	1 1	1 2	1 1	1 2	1 2	1 2	1 1	1 2	1 1	1 1	1 1	1 1	1 1	1 2	1 2	1 1	1 2	1 1	1 1	0 0	1 2	1 1	1 1	1 1	1 2	1 1	1 2	1 1	2 2	1 2	1 2	1 1	1 1	1 2	1 2	1 1	1 2	1 2	1 2	1 2	1 1	1 2	1 2	1 2	1 2	1 2	1 1	1 2	2 2	1 1	1 1	1 2	1 2	1 2	1 2	1 2	2 2	1 1	1 2	1 2	1 2	1 1	1 2	1 1	1 2	1 1	1 1	1 1	1 1	1 2	1 2	1 2	1 1	1 1	1 1	1 1	1 2	1 2	1 1	1 2	1 2	1 2	1 1	1 2	1 1	1 1	1 1	1 1	1 1	1 1	1 2	1 1	0 0	2 2	1 1	1 1	1 2	1 2	2 2	1 1	1 1	1 2	1 2	0 0	1 1	1 1	1 2	2 2	1 1	1 1	1 1	1 1	1 2	1 1	1 1	2 2	2 2	1 1	1 2	2 2	1 2	1 2	2 2	1 1	1 1	1 2	2 2	1 2	1 1	1 1	1 1	1 1	1 1	1 1	2 2	1 1	0 0	1 2	0 0	1 2	1 1	1 2	1 2	1 2	2 2	1 1	1 2	1 2	1 1	1 1	1 2	1 2	2 2	1 2	1 2	1 1	1 2	1 2	1 1	1 1	2 2	2 2	2 2	1 2	1 1	1 2	1 1	1 2	1 1	1 2	1 2	1 1	1 2	1 2	1 2	1 1	1 1	1 1	1 2	1 1	1 2	1 1	1 1	1 1	1 2	1 2	2 2	1 2	1 1	1 2	1 1	1 2	1 1	1 1	1 1	1 1	1 1	1 1	1 1	1 2	1 1	1 1	1 1	1 2	1 1	1 2	1 1	1 1	1 1	2 2	1 2	1 1	1 1	1 2	1 1	1 2	1 2	1 2	1 1	1 2	1 2	0 0	1 2	1 2	1 1	1 2	1 2	1 1	2 2	1 1	1 2	1 1	2 2	1 1	2 2	1 1	1 2	1 2	1 2	1 1	1 1	1 2	1 2	1 2	1 2	1 2	1 1	1 2	1 2	1 1	2 2	1 2	1 1	1 2	1 2	1 2	1 2	2 2	2 2	1 1	1 1	1 2	1 2	1 2	1 1	2 2	2 2	1 1	1 1	1 1	1 1	1 2	1 2	1 2	1 2	1 2	1 1	1 1	2 2	1 2	1 2	1 1	1 1	1 2	1 2	1 1	1 2	1 2	1 1	1 2	1 2	1 2	1 2	1 1	1 2	1 1	1 1	1 1	0 0	1 2	1 1	1 2	1 2	1 2	1 2	1 1	1 1	1 2	1 1	1 1	0 0	1 1	1 2	1 1	1 1	0 0	1 1	1 2	1 2	2 2	1 1	1 1	1 2	1 2	1 2	1 2	1 1	1 1	1 2	1 2	1 1	2 2	1 1	1 2	1 2	1 1	1 2	1 1	0 0	1 2	1 2	1 1	1 1	1 1	1 1	1 1	1 2	1 2	1 2	1 2	1 1	1 2	1 1	1 2	1 1	1 2	1 2	1 1	1 2	1 2	1 1	1 1	1 1	2 2	2 2	1 2	2 2	1 1	1 1	1 2	1 2	1 1	1 2	1 2	1 1	2 2	1 2	1 1	2 2	1 2	2 2	2 2	1 2	1 1	2 2	1 2	2 2	1 1	1 1	0 0	1 1	1 2	1 1	1 2	1 1	1 1	1 1	1 1	1 1	0 0	1 1	1 2	1 1	2 2	1 2	1 2	1 2	2 2	2 2	1 1	1 1	1 2	1 2	1 1	1 1	2 2	1 1	1 1	1 2	1 1	1 2	1 2	1 1	0 0	1 2	2 2	0 0	1 1	2 2	1 1	1 2	1 1	1 1	1 2	1 1	2 2	1 2	1 1	1 2	1 2	1 1	1 1	1 2	2 2	1 1	2 2	1 1	1 2	1 1	1 1	1 2	1 2	2 2	1 2	1 2	1 1	2 2	1 2	1 2	2 2	1 2	1 2	1 2	0 0	2 2	2 2	1 1	0 0	1 1	1 2	1 1	0 0	1 2	1 2	2 2	1 1	1 2	2 2	1 1	1 2	1 2	1 2	1 1	1 2	1 1	1 1	1 1	1 2	1 1	1 1	1 2	1 2	1 2	1 1	1 1	1 2	0 0	1 2	1 2	1 1	1 2	1 1	1 2	1 1	1 2	1 2	1 1	1 2	1 1	1 1	1 2	1 2	1 1	1 1	1 2	1 1	1 1	2 2	1 2	1 2	1 1	1 1	1 1	1 1	1 2	1 2	1 2	1 2	2 2	1 1	1 1	2 2	1 1	1 1	2 2	1 1	1 1	1 1	1 1	1 1	1 2	1 1	1 1	1 2	1 1	1 1	1 2	1 2	1 2	1 1	1 2	1 2	1 2	1 2	0 0	1 1	1 2	1 2	1 2	1 2	1 1	1 2	1 1	2 2	2 2	0 0	1 1	1 2	1 1	1 2	1 1	2 2	2 2	0 0	1 1	0 0	1 1	1 2	1 1	1 1	1 1	1 2	1 2	2 2	1 1	1 2	1 2	1 1	1 2	1 2	1 1	1 2	1 1	1 1	2 2	1 1	1 1	1 2	1 1	1 1	1 1	1 1	1 1	1 2	1 1	1 2	1 2	1 2	1 2	1 2	1 1	2 2	1 2	1 2	2 2	1 1	1 2	1 1	1 2	1 2	0 0	1 2	1 1	0 0	2 2	1 1	2 2	1 1	1 2	1 1	1 2	2 2	1 1	1 1	1 1	1 1	1 2	1 2	1 2	1 2	1 1	1 1	1 2	2 2	1 1	1 1	1 1	1 2	1 1	1 2	1 1	1 2	1 1	1 2	1 1	1 2	1 1	1 1	1 1	1 2	1 2	1 2	2 2	1 1	1 2	1 1	0 0	1 1	1 1	1 1	1 2	1 2	1 2	1 2	1 2	1 2	1 1	1 1	1 2	1 2	1 1	1 1	2 2	1 2	1 1	1 1	1 1	1 1	1 2	1 2	1 1	1 1	1 2	1 2	1 1	1 1	1 1	1 2	1 1	2 2	1 1	1 2	1 2	1 1	1 1	1 1	1 2	0 0	1 2	1 1	1 2	1 2	1 2	1 1	2 2	1 1	1 2	1 2	1 2	1 1	2 2	2 2	1 2	2 2	1 2	1 1	1 1	1 2	1 1	2 2	1 2	1 2	1 1	1 2	1 2	1 2	1 1	1 2	1 1	1 1	1 2	1 1	1 2	2 2	1 2	1 2	2 2	1 1	1 2	1 1	1 1	1 2	1 2	1 2	1 2	1 1	1 1	1 1	2 2	1 2	1 1	1 2	1 1	1 1	1 2	2 2	1 2	1 1	1 2	1 2	1 2	2 2	1 2	2 2	1 1	1 1	1 1	0 0	1 2	1 2	1 1	1 1	1 2	1 2	1 1	1 2	1 2	1 1	1 2	1 2	1 1	1 1	1 1	1 1	1 2	1 1	1 2	1 1	0 0	1 2	2 2	1 1	0 0	1 2	1 1	1 2	2 2	1 1	1 1	1 2	1 1	1 2	1 2	1 2	1 2	1 1	1 1	1 1	1 1	1 1	1 2	1 2	1 1	1 1	2 2	1 1	1 2	1 2	1 1	1 1	0 0	1 1	1 2	1 1	1 2	1 1	1 1	1 2	1 2	1 2	2 2	1 1	1 1	1 2	1 2	1 1	1 2	1 1	1 2	1 2	2 2	1 1	1 1	0 0	1 1	1 2	1 1	0 0	1 1	1 1	1 2	1 1	1 1	1 2	1 2	1 1	0 0	1 2	1 2	1 2	0 0	2 2	1 2	1 1	1 1	2 2	1 2	1 1	0 0	1 2	1 1	1 2	1 1	0 0	2 2	1 2	1 2	1 1	1 1	0 0	1 1	1 1	1 2	1 1	1 2	1 2	1 2	1 2	1 2	1 2	1 2	1 2	1 1	1 1	1 2	1 2	1 2	1 1	1 2	1 2	1 1	2 2	0 0	1 2	0 0	1 2	1 1	1 1	1 2	1 1	0 0	1 1	1 1	1 1	1 2	1 1	1 1	0 0	1 2	1 1	1 1	1 1	1 1	1 2	1 1	1 2	1 1	2 2	1 1	1 1	1 2	1 2	1 1	1 1	1 1	1 2	1 1	1 2	0 0	1 1	1 2	1 2	1 1	1 1	1 2	2 2	1 1	2 2	2 2	2 2	1 2	1 1	2 2	1 1	1 1	1 1	2 2	1 2	1 1	1 1	1 2	1 2	1 2	1 2	1 2	1 2	1 1	1 1	1 2	1 2	1 2	1 2	1 1	1 2	2 2	1 1	2 2	1 1	2 2	1 1	1 1	2 2	1 2	1 1	1 2	1 2	1 2	1 2	1 1	1 1	2 2	1 1	1 2	2 2	1 1	1 2	1 1	1 2	1 1	1 1	2 2	1 1	1 1	1 1	1 1	1 1	1 1	1 1	1 1	1 2	1 2	2 2	1 2	1 1	1 2	1 2	1 2	1 2	1 2	2 2	1 2	1 1	1 1	1 1	1 2	1 2	1 1	1 2	1 2	1 1	1 1	1 1	0 0	1 1	1 2	2 2	1 2	1 1	1 1	1 1	0 0	2 2	2 2	1 1	1 2	1 2	1 2	1 2	1 2	1 1	1 1	1 1	1 1	1 1	1 2	1 1	1 2	1 2	1 2	1 2	1 1	1 2	1 1	2 2	1 1	2 2	1 1	1 1	1 1	1 2	1 2	1 2	1 1	1 2	1 1	1 2	2 2	2 2	1 1	1 1	1 2	1 1	1 1	1 1	1 1	1 1	1 1	1 1	1 1	1 1	2 2	1 1	1 1	1 1	1 1	1 1	0 0	1 2	1 1	1 2	1 1	0 0	1 1	1 1	1 2	2 2	1 1	1 2	1 2	1 2	1 1	1 1	1 2	1 2	2 2	1 2	1 2	1 1	1 2	1 2	1 2	1 1	1 2	1 2	1 2	0 0	1 2	2 2	1 1	1 2	1 1	1 1	1 1	2 2	2 2	1 2	1 2	1 2	1 2	1 1	1 2	1 2	1 2	1 1	1 1	1 2	1 1	1 1	1 1	1 2	0 0	2 2	1 1	1 2	1 2	1 1	1 1	1 1	1 1	1 2	1 1	2 2	1 2	1 1	1 2	1 2	1 1	1 1	1 1	1 2	1 1	2 2	1 2	0 0	1 2	1 1	1 1	1 1	1 2	1 1	1 2	0 0	1 2	1 2	1 2	1 1	0 0	1 2	1 1	1 2	2 2	1 1	2 2	1 1	1 2	1 2	1 2	1 1	1 1	1 1	0 0	2 2	1 1	1 1	1 2	1 1	1 2	1 2	1 2	2 2	1 2	2 2	1 2	1 2	1 1	1 2	1 1	0 0	1 2	1 2	1 2	1 1	1 2	1 1	1 1	1 1	2 2	1 1	1 1	1 1	2 2	1 2	2 2	1 2	1 2	1 2	1 1	1 1	2 2	1 1	1 2	1 1	1 1	1 2	1 1	1 2	1 2	1 1	2 2	1 1	1 1	1 2	1 1	1 1	1 2	1 1	1 2	1 2	1 2	1 2	1 2	2 2	1 2	1 2	1 1	1 2	1 1	1 2	1 1	1 1	1 1	1 1	1 1	1 1	1 2	2 2	1 2	1 2	1 2	1 2	2 2	1 1	1 1	1 2	1 1	1 2	1 2	1 2	0 0	1 2	2 2	1 1	1 1	2 2	2 2	1 1	1 2	0 0	1 1	1 1	1 1	1 2	1 1	1 2	2 2	0 0	1 1	1 2	2 2	1 2	1 1	1 1	1 1	0 0	1 2	1 1	1 1	1 2	1 1	0 0	1 2	0 0	1 1	2 2	1 2	1 1	2 2	1 1	1 1	1 1	1 2	1 1	1 2	1 2	1 1	1 1	1 1	1 1	1 1	1 2	1 1	1 2	1 2	1 1	1 2	1 2	2 2	2 2	2 2	1 2	0 0	1 2	1 1	1 1	1 2	1 1	1 2	1 2	1 1	1 2	0 0	1 1	1 1	1 2	1 2	1 1	1 1	1 2	1 2	1 2	1 2	1 2	1 1	2 2	1 1	0 0	1 2	1 1	1 2	2 2	1 2	1 2	2 2	1 2	1 1	1 2	1 2	1 2	1 2	1 1	1 1	1 1	1 1	2 2	1 1	1 1	1 2	1 2	1 1	1 1	1 2	1 1	1 2	0 0	1 1	1 2	1 1	1 2	1 1	1 1	1 2	1 2	2 2	1 2	1 2	1 2	1 1	1 1	1 1	1 1	1 1	0 0	1 1	1 1	2 2	1 1	1 1	1 2	0 0	1 1	1 1	1 1	1 2	1 1	1 2	1 1	0 0	1 2	1 1	1 2	1 1	1 1	1 1	1 2	1 2	1 1	1 2	1 1	1 2	1 2	1 1	1 2	1 1	1 1	1 1	1 2	1 1	1 1	2 2	0 0	1 2	2 2	1 2	1 2	1 1	2 2	0 0	1 2	0 0	0 0	1 1	1 1	1 1	1 1	1 1	1 1	1 2	1 1	1 2	1 1	1 2	1 1	1 2	0 0	1 1	1 2	2 2	1 1	0 0	1 1	2 2	1 2	1 1	1 1	1 2	1 2	1 2	1 2	1 2	1 2	1 2	1 2	1 2	1 2	1 1	1 2	1 2	0 0	1 1	2 2	1 2	1 2	1 1	1 2	1 2	1 2	1 2	1 1	1 2	1 1	1 2	1 1	1 1	1 1	2 2	1 2	1 2	1 1	1 1	2 2	1 2	1 1	1 2	0 0	1 1	1 1	0 0	1 1	0 0	1 2	0 0	1 1	1 1	1 1	1 1	1 1	1 1	1 1	1 2	1 1	1 1	1 2	1 1	1 1	1 1	1 1	2 2	1 2	1 2	1 2	1 1	1 1	1 1	1 1	1 1	1 1	1 2	2 2	1 1	1 2	1 1	1 2	1 2	1 2	1 2	1 2	1 1	1 1	0 0	1 2	1 2	1 2	1 2	1 1	1 1	1 1	1 2	1 2	1 2	1 2	1 1	1 1	1 1	1 1	1 1	1 2	2 2	1 2	1 2	1 1	1 2	1 2	2 2	1 1	1 2	1 2	1 2	1 1	1 2	1 1	1 1	1 1	1 1	1 2	1 1	1 2	2 2	1 1	1 2	1 2	2 2	1 1	1 1	1 2	1 1	1 1	1 1	1 1	1 2	1 2	1 1	1 1	1 1	1 1	1 1	1 1	1 2	1 1	1 1	1 2	1 2	1 2	0 0	1 2	1 2	1 2	2 2	1 2	1 2	1 1	1 2	1 1	1 1	2 2	1 2	2 2	1 1	1 1	1 1	1 2	1 2	1 2	1 1	1 2	1 2	1 2	1 1	1 1	1 1	1 1	1 1	1 1	1 1	1 2	1 1	1 1	1 1	1 2	1 1	1 1	1 2	1 2	1 2	1 2	1 1	1 1	1 1	1 2	1 1	1 1	1 2	2 2	1 1	1 2	0 0	1 2	1 1	1 1	1 1	1 1	1 1	1 2	1 2	1 1	1 2	1 1	2 2	1 1	1 2	1 1	1 2	1 1	1 2	1 1	1 1	1 1	1 2	1 2	1 1	1 2	1 1	1 2	1 2	2 2	1 2	1 1	1 2	1 1	0 0	1 2	1 1	1 2	2 2	1 2	1 2	1 1	1 2	2 2	1 1	1 1	2 2	1 2	1 2	1 1	1 1	1 2	1 2	1 1	1 1	1 1	1 1	1 1	1 1	1 2	1 1	1 1	1 1	1 1	1 2	1 1	1 1	1 1	0 0	1 2	2 2	2 2	1 2	1 1	1 2	1 2	1 2	0 0	1 1	1 1	2 2	1 2	1 1	1 2	1 1	1 2	1 1	1 2	1 1	1 2	1 2	1 1	1 2	1 2	1 1	1 2	1 1	1 2	0 0	2 2	1 2	2 2	1 1	1 2	0 0	1 2	1 2	1 2	1 2	2 2	1 2	1 1	1 1	1 1	1 2	1 2	1 2	1 2	1 1	1 1	2 2	1 2	1 2	1 2	1 1	1 2	1 1	1 1	2 2	1 2	2 2	1 2	2 2	1 1	1 1	1 1	2 2	1 2	1 1	2 2	0 0	1 2	1 2	1 1	1 2	1 2	1 1	1 1	1 1	2 2	1 2	1 2	1 1	1 1	2 2	2 2	2 2	1 1	1 1	1 2	1 2	1 2	2 2	1 1	1 1	1 1	1 1	1 1	1 1	1 2	1 2	1 1	1 1	1 2	2 2	1 1	1 2	1 1	1 2	2 2	1 1	1 1	2 2	1 1	1 1	1 1	1 2	1 1	1 1	1 1	1 2	1 1	1 1	1 2	1 1	1 1	1 1	1 2	1 1	1 1	1 2	1 1	1 1	2 2	1 2	1 1	1 1	2 2	1 2	1 1	1 1	0 0	1 2	1 1	1 2	1 2	1 1	0 0	1 2	1 1	1 2	1 2	1 1	1 1	1 1	1 2	2 2	2 2	1 2	1 1	1 1	1 2	1 2	1 1	1 1	1 2	1 1	2 2	1 2	1 1	1 1	1 2	1 1	1 1	1 1	2 2	1 1	1 2	1 1	1 1	1 1	1 1	1 1	2 2	1 1	2 2	1 1	1 1	1 2	1 2	1 2	1 2	1 1	1 2	1 1	1 1	1 2	1 1	1 1	2 2	1 2	1 1	1 1	1 2	1 1	1 1	1 1	2 2	1 2	1 2	0 0	1 1	0 0	1 2	1 1	2 2	1 1	1 2	0 0	1 1	1 2	1 1	0 0	1 2	1 2	1 2	1 2	1 2	0 0	1 1	1 1	1 1	1 1	1 1	1 1	1 1	2 2	2 2	1 2	1 1	1 2	1 2	1 2	1 1	1 2	1 1	1 2	1 1	0 0	1 2	1 1	1 1	1 2	1 1	1 2	2 2	1 1	1 2	1 2	1 1	1 2	0 0	1 1	1 1	1 1	1 2	1 2	1 2	1 1	1 2	1 2	1 2	1 2	1 2	2 2	1 1	1 2	1 2	1 1	1 2	1 1	1 2	1 1	2 2	1 1	2 2	1 1	1 1	1 2	2 2	1 1	1 2	1 2	1 2	1 1	2 2	1 2	1 2	1 1	2 2	1 1	1 1	1 2	1 2	2 2	1 2	1 2	1 1	1 1	1 2	2 2	2 2	2 2	1 2	1 1	1 1	1 1	1 1	1 1	1 2	1 1	1 1	1 2	1 2	1 1	2 2	1 1	1 2	1 1	1 2	0 0	1 2	2 2	1 2	1 2	1 1	1 1	1 2	1 1	2 2	1 2	1 1	1 2	2 2	1 1	1 2	1 1	1 1	1 1	1 1	1 1	1 1	2 2	1 1	1 1	1 1	1 2	1 2	1 2	1 2	1 2	1 2	1 2	1 2	2 2	0 0	1 2	1 2	1 2	1 1	1 1	1 1	1 1	1 1	1 1	1 2	1 2	1 2	1 1	1 1	1 1	1 2	1 1	1 2	1 2	0 0	1 1	1 2	1 1	1 1	1 1	1 1	1 2	1 2	1 1	1 2	1 2	1 1	1 1	1 1	1 2	1 1	1 1	0 0	1 2	1 1	1 1	1 2	1 2	1 1	0 0	1 1	1 2	1 2	1 2	1 2	1 2	1 2	1 2	1 2	1 1	1 2	1 1	1 2	1 1	1 1	1 1	0 0	1 1	1 1	1 1	1 2	1 2	1 1	1 2	1 1	1 1	2 2	1 2	1 1	1 2	1 1	1 2	1 2	1 2	1 2	1 1	1 1	2 2	1 2	0 0	1 2	2 2	1 2	1 1	2 2	1 1	1 2	1 1	1 2	1 2	1 1	1 2	1 1	1 1	1 2	1 1	1 1	1 1	1 1	1 1	1 1	1 2	1 1	1 2	1 1	2 2	1 2	1 1	1 1	1 2	1 2	0 0	2 2	1 1	0 0	1 2	1 2	1 1	1 1	1 1	1 1	1 1	1 1	1 1	1 1	1 2	1 1	1 2	1 2	2 2	1 2	1 2	1 2	1 2	1 1	1 1	1 1	2 2	1 2	1 1	1 1	1 2	1 2	1 1	1 1	1 1	1 1	1 1	1 1	1 2	1 2	1 2	1 1	1 1	0 0	1 1	1 2	1 2	1 1	1 1	1 2	1 2	1 1	1 1	1 1	1 1	1 1	1 2	1 1	2 2	1 2	1 1	1 2	1 2	0 0	1 2	0 0	1 2	1 1	1 2	1 1	1 1	2 2	1 2	1 1	1 2	2 2	1 2	1 2	1 2	1 2	1 1	1 2	1 1	1 1	1 2	1 2	1 2	1 1	1 1	1 2	1 1	2 2	1 1	1 1	1 2	2 2	1 1	1 2	1 2	1 1	1 1	1 1	1 2	1 1	1 2	1 1	1 1	1 1	1 2	1 2	1 1	2 2	1 2	1 2	1 2	1 1	0 0	2 2	2 2	1 1	1 1	1 2	1 1	1 2	1 1	1 1	1 1	0 0	1 1	1 1	1 1	1 2	1 1	1 1	1 2	2 2	1 2	1 1	2 2	1 1	1 1	1 1	1 2	1 2	2 2	2 2	0 0	1 2	1 1	1 1	1 2	1 2	1 1	1 2	2 2	1 2	1 1	1 2	1 1	1 1	0 0	1 1	1 2	1 2	1 2	1 1	2 2	1 1	1 2	1 1	1 2	1 2	2 2	1 2	1 2	0 0	1 1	1 1	2 2	1 1	1 2	1 1	1 2	2 2	1 2	1 2	1 1	1 2	1 2	2 2	1 2	1 1	1 1	1 1	0 0	1 1	1 2	1 1	1 1	1 1	1 2	1 2	1 2	1 2	1 2	1 1	1 1	1 2	1 1	1 1	1 1	0 0	1 2	1 1	1 2	2 2	1 1	1 2	0 0	1 1	1 1	1 1	1 1	1 2	1 1	1 2	1 2	1 2	1 2	1 1	1 2	1 2	1 2	2 2	1 1	1 1	1 1	1 1	1 1	1 1	1 1	1 2	2 2	1 1	1 1	2 2	1 2	1 2	1 1	1 1	1 1	1 1	1 1	1 1	1 1	1 1	1 1	1 2	0 0	1 1	1 2	1 1	2 2	1 2	2 2	1 1	1 2	2 2	1 1	1 2	1 1	1 1	1 1	1 1	1 2	1 1	1 2	0 0	1 2	1 2	1 1	1 2	2 2	1 2	1 1	1 1	1 1	1 1	2 2	2 2	1 2	1 1	1 1	1 1	1 1	1 1	1 2	1 2	1 1	1 1	1 2	1 1	1 2	2 2	1 1	1 2	1 1	1 1	2 2	1 1	1 2	1 1	2 2	1 2	1 1	1 1	1 2	1 2	0 0	1 1	1 1	1 1	1 1	1 1	1 1	1 2	1 2	1 1	1 2	1 1	1 1	1 2	1 1	1 1	1 1	0 0	1 1	1 1	2 2	1 1	2 2	2 2	0 0	1 2	1 1	2 2	0 0	1 2	1 1	1 2	1 2	1 2	1 2	1 2	1 2	1 1	1 1	1 2	2 2	1 1	1 1	1 2	1 1	1 1	1 2	1 2	1 2	1 1	1 2	1 2	1 1	1 1	1 2	1 1	0 0	1 2	1 1	2 2	1 1	1 1	2 2	1 1	2 2	1 2	1 2	1 2	1 1	1 2	1 1	1 2	1 2	1 1	1 1	1 1	1 1	2 2	1 1	1 1	1 2	2 2	1 1	1 1	1 2	1 1	1 2	1 2	1 1	1 1	2 2	1 1	1 2	1 2	1 1	1 2	1 2	1 1	1 1	1 1	1 2	1 1	2 2	0 0	1 1	1 1	1 1	1 1	1 2	1 1	1 2	1 1	1 1	1 2	1 2	2 2	1 2	1 2	1 1	1 2	1 2	1 2	1 1	1 2	1 2	1 1	1 2	1 1	2 2	2 2	1 2	1 1	1 1	1 1	1 1	1 2	1 1	1 2	1 2	1 1	1 2	2 2	0 0	1 1	1 1	2 2	0 0	1 2	1 2	1 2	1 1	2 2	1 2	1 2	1 2	1 1	1 2	1 2	1 2	1 2	1 2	1 2	1 1	1 2	1 1	1 1	1 2	1 1	1 1	1 1	1 2	1 2	1 1	1 2	1 1	2 2	1 2	1 1	2 2	1 2	1 2	1 2	1 2	1 1	1 1	1 1	1 1	1 1	1 2	1 1	1 2	1 2	1 2	1 2	1 2	2 2	1 1	1 2	1 1	1 1	1 1	1 2	1 1	1 2	1 1	1 1	1 2	2 2	1 2	1 2	1 1	1 1	1 2	1 1	1 1	1 2	1 1	1 1	0 0	1 1	1 2	1 2	1 2	1 2	1 2	1 1	1 1	1 1	1 2	1 2	1 2	1 1	1 2	1 1	1 1	1 1	1 1	1 1	1 1	1 1	1 1	1 2	2 2	1 1	1 2	1 2	2 2	1 1	1 1	1 1	1 1	1 1	1 1	0 0	1 1	1 2	1 1	1 1	1 2	2 2	1 1	1 1	1 2	1 1	1 2	1 1	1 1	1 2	1 1	1 1	1 1	1 2	1 1	1 1	1 1	1 2	2 2	1 2	1 2	1 1	1 1	1 1	1 2	1 1	1 1	1 2	1 1	1 2	1 2	1 2	1 2	2 2	0 0	1 1	1 2	1 2	1 1	1 1	1 1	1 2	1 1	1 2	1 2	1 1	1 1	2 2	1 2	1 1	1 2	1 2	0 0	1 2	0 0	1 1	1 1	1 2	0 0	1 2	1 1	1 1	2 2	1 2	2 2	2 2	1 1	1 2	1 2	1 1	1 2	1 2	2 2	1 2	0 0	1 1	1 2	1 2	1 1	1 1	1 1	1 1	1 1	1 1	1 1	1 2	1 1	1 1	1 2	1 1	1 1	1 1	1 1	0 0	1 2	1 1	1 1	2 2	1 2	1 1	1 2	1 2	1 2	1 2	1 1	1 2	2 2	2 2	1 1	1 2	1 1	1 2	1 2	1 1	1 1	1 1	1 2	1 2	1 1	1 1	1 2	0 0	1 2	0 0	1 2	2 2	1 2	1 1	2 2	1 2	1 2	1 1	1 2	1 1	1 1	1 2	1 2	1 2	1 2	1 1	1 2	2 2	1 1	2 2	1 2	1 1	1 1	2 2	1 1	1 1	1 1	1 1	1 1	1 2	1 2	2 2	1 2	1 1	1 2	1 1	1 2	1 1	1 2	1 1	1 2	1 1	1 1	1 1	1 2	1 1	1 2	1 2	1 1	1 1	1 2	1 1	1 1	2 2	1 1	1 1	1 1	1 1	1 2	1 1	1 2	1 2	2 2	2 2	1 1	1 2	1 2	1 1	1 2	1 2	1 1	1 2	2 2	1 2	1 1	1 2	1 2	2 2	1 2	1 2	2 2	1 2	1 1	2 2	1 2	1 1	0 0	1 1	1 1	1 2	1 2	1 2	2 2	1 1	1 1	1 2	1 1	2 2	1 2	1 1	1 2	1 1	1 2	1 1	1 2	1 2	2 2	2 2	2 2	1 1	2 2	1 1	1 2	1 2	1 2	1 1	1 1	1 2	1 1	2 2	1 1	1 2	1 2	2 2	1 1	1 2	0 0	1 2	1 2	1 1	1 2	1 2	1 2	0 0	1 1	1 2	1 1	1 1	1 1	1 2	2 2	1 2	1 1	1 1	1 2	2 2	1 2	1 1	1 1	1 1	1 2	1 2	1 2	1 1	1 1	1 1	1 1	1 1	2 2	1 2	1 1	1 1	1 2	1 2	1 1	0 0	1 2	1 1	1 2	1 1	1 2	1 2	0 0	2 2	1 1	1 2	1 1	1 1	2 2	0 0	1 2	1 2	1 1	1 1	0 0	1 2	1 2	0 0	1 2	1 2	1 1	2 2	2 2	1 1	1 1	1 1	1 2	1 1	1 1	1 2	1 1	1 2	1 1	2 2	1 1	1 1	1 2	1 2	1 1	1 1	1 1	1 2	2 2	1 1	1 1	1 2	1 2	2 2	1 1	1 2	1 1	1 2	0 0	1 2	1 2	1 2	1 2	0 0	1 1	2 2	1 2	0 0	2 2	1 1	1 2	1 1	1 2	1 1	1 2	1 1	1 1	1 2	1 2	1 2	1 1	1 2	1 2	0 0	1 1	1 2	1 1	1 2	1 1	2 2	1 2	1 1	1 1	1 1	2 2	0 0	2 2	1 2	0 0	1 2	1 2	1 1	1 2	1 1	1 2	1 1	1 2	1 2	0 0	1 1	1 2	1 2	1 2	1 1	1 2	1 1	1 1	1 2	2 2	2 2	2 2	1 2	1 2	2 2	1 2	1 2	1 1	1 1	2 2	1 1	1 1	1 2	1 1	1 1	1 1	1 1	1 2	1 1	1 1	1 2	1 2	0 0	1 2	2 2	2 2	2 2	1 1	2 2	1 1	1 1	1 2	0 0	1 2	1 2	1 2	1 2	1 1	1 2	1 2	1 2	1 1	1 2	1 2	1 1	1 1	1 2	1 2	1 2	1 1	1 2	1 2	1 2	1 2	1 1	1 2	1 1	1 2	1 2	2 2	1 2	1 1	1 1	1 2	1 2	1 2	1 2	1 2	1 2	2 2	1 1	1 1	1 2	1 1	1 1	1 2	1 2	2 2	0 0	1 2	1 2	2 2	2 2	2 2	1 2	1 2	1 2	1 1	2 2	1 1	2 2	1 2	1 1	1 2	1 1	1 2	1 2	0 0	1 1	0 0	1 2	1 2	1 2	1 1	2 2	1 1	2 2	1 1	1 1	2 2	1 1	1 1	1 2	0 0	1 1	1 1	1 2	1 2	1 1	1 1	2 2	1 1	1 1	1 1	1 1	1 2	1 1	1 2	1 1	1 1	1 1	1 1	1 1	1 2	1 2	1 1	1 2	1 1	1 2	1 2	1 1	1 2	2 2	1 1	1 2	1 1	0 0	1 1	1 1	0 0	1 1	1 1	1 1	1 2	1 1	2 2	2 2	1 2	1 2	1 1	2 2	1 1	1 2	1 2	1 1	1 2	1 1	1 2	1 1	1 2	2 2	1 2	1 2	1 2	1 2	1 2	1 1	1 1	1 2	1 2	0 0	1 1	1 1	1 1	1 1	1 2	1 2	1 2	2 2	1 2	1 2	1 1	1 1	1 2	1 1	1 1	1 2	1 1	1 2	1 2	1 1	1 2	1 2	2 2	1 1	1 1	1 1	1 2	1 2	1 2	1 1	2 2	1 2	1 1	1 2	2 2	1 1	1 1	1 1	1 2	1 1	1 2	2 2	1 2	1 1	1 2	1 1	1 2	2 2	1 1	1 1	1 1	1 2	1 2	1 1	1 1	1 1	1 2	1 1	1 1	2 2	1 1	1 1	1 1	1 1	1 2	1 2	1 1	1 1	1 2	1 1	1 1	1 1	1 1	1 1	2 2	1 2	1 2	1 2	1 2	1 2	1 2	1 2	1 1	1 2	1 2	2 2	1 2	1 2	1 2	1 1	1 1	2 2	1 1	2 2	1 2	1 1	1 2	1 2	1 1	1 2	1 2	1 2	1 1	1 2	2 2	1 1	1 1	1 1	1 1	1 1	1 1	1 2	1 2	1 1	1 2	1 2	1 2	1 2	1 2	2 2	1 2	1 2	1 1	1 1	1 2	1 1	1 1	1 2	1 2	1 2	1 2	1 1	1 1	1 2	1 2	2 2	1 2	1 2	1 2	1 2	2 2	1 1	1 2	1 1	1 2	1 2	1 1	1 2	1 2	1 2	2 2	1 1	1 2	1 2	1 2	1 2	1 2	1 2	1 2	1 2	1 2	1 1	1 2	1 2	1 1	1 1	2 2	1 2	1 1	1 1	1 2	1 2	1 2	1 1	1 2	1 1	1 1	1 1	1 2	2 2	1 1	1 2	1 1	2 2	1 1	1 1	1 1	1 2	1 2	1 1	1 1	1 2	1 1	1 2	1 2	1 2	1 2	2 2	1 1	1 1	1 2	1 2	0 0	2 2	1 2	1 2	1 2	1 1	1 1	1 2	1 1	1 2	1 2	1 1	1 2	1 2	1 2	1 2	1 2	1 2	1 2	1 2	1 1	1 2	1 1	1 2	1 1	2 2	2 2	1 1	1 2	2 2	1 2	1 1	0 0	1 1	1 2	1 2	1 1	1 2	1 2	1 1	1 2	1 1	1 1	1 2	1 1	1 2	1 2	1 2	1 1	1 2	1 2	1 1	1 1	1 2	1 1	1 1	1 1	1 1	1 2	1 1	2 2	1 1	1 2	1 1	1 2	1 2	2 2	2 2	1 2	1 1	1 1	1 1	0 0	1 1	1 2	1 1	1 1	1 2	2 2	1 1	1 1	1 1	2 2	1 1	1 1	0 0	2 2	1 1	0 0	1 2	1 1	1 1	1 1	1 1	0 0	1 2	1 1	1 2	2 2	1 2	1 2	1 1	1 2	1 1	1 1	1 1	1 1	1 2	2 2	1 1	1 1	1 1	1 1	1 1	1 1	1 2	1 1	1 1	1 2	1 2	1 1	1 2	2 2	1 1	1 1	1 2	0 0	2 2	0 0	1 2	1 1	1 2	2 2	1 1	1 1	1 1	1 2	1 2	1 1	1 1	1 1	1 2	1 1	1 2	1 2	1 2	1 2	1 2	1 2	1 1	1 1	1 1	1 2	1 2	0 0	1 2	1 1	1 1	1 2	1 1	1 2	0 0	1 2	2 2	1 1	1 1	1 2	1 1	1 1	1 2	1 1	1 1	1 1	1 1	1 1	1 2	1 2	1 2	1 2	1 2	1 2	1 1	1 1	1 1	1 1	2 2	1 1	1 1	0 0	1 1	1 1	1 1	1 2	1 1	1 2	1 2	2 2	2 2	1 2	1 1	1 2	1 1	1 2	1 2	1 2	1 1	1 2	1 1	0 0	2 2	1 2	1 2	2 2	1 2	1 1	1 1	1 1	2 2	1 2	1 2	1 1	0 0	1 1	1 2	1 2	1 1	1 1	1 2	1 2	1 1	1 2	2 2	0 0	1 1	1 1	2 2	1 1	1 1	1 2	1 2	1 1	1 1	1 1	1 2	1 2	1 1	1 1	1 2	1 2	1 1	1 1	2 2	2 2	1 1	2 2	1 2	1 2	0 0	2 2	0 0	1 2	1 2	1 2	1 1	1 1	1 2	1 2	1 1	1 1	0 0	1 2	1 1	1 2	1 1	1 2	1 1	1 2	1 2	1 1	1 2	1 2	2 2	1 1	1 2	1 1	1 2	2 2	1 2	1 1	1 1	0 0	1 1	1 1	2 2	2 2	1 2	1 2	1 2	1 1	1 2	1 2	2 2	1 2	1 1	1 2	1 1	1 2	2 2	1 2	1 1	2 2	1 2	1 1	1 2	0 0	1 1	1 2	2 2	0 0	1 1	1 2	1 1	1 1	1 1	1 1	1 2	1 1	1 2	1 1	1 1	1 1	0 0	1 1	1 2	1 1	1 2	1 1	2 2	1 1	2 2	1 1	1 1	1 2	1 2	1 2	2 2	1 2	1 2	1 1	1 2	1 2	1 2	1 1	1 2	1 1	1 2	1 1	1 1	1 1	2 2	1 1	0 0	1 2	1 2	1 1	1 2	1 1	1 2	1 2	1 1	1 1	1 2	1 2	1 1	1 1	1 2	2 2	1 1	0 0	1 2	1 1	1 1	1 1	0 0	1 2	1 2	1 2	1 1	1 2	1 2	1 1	2 2	1 1	1 2	1 2	1 2	1 1	1 1	1 2	1 1	1 1	2 2	1 2	1 2	1 1	2 2	1 2	1 2	2 2	1 2	1 2	1 1	1 1	1 1	2 2	2 2	1 2	1 2	1 2	1 2	1 2	1 2	1 1	2 2	1 1	1 2	1 2	1 1	1 2	1 1	2 2	1 2	2 2	1 2	1 1	1 1	1 1	1 1	1 1	2 2	1 2	1 2	1 1	0 0	2 2	1 1	1 1	2 2	0 0	1 2	1 2	1 1	1 1	1 1	1 1	1 2	1 2	1 2	1 2	1 1	1 2	1 2	1 1	1 2	1 2	1 2	1 1	1 1	1 1	1 1	2 2	1 1	1 2	1 2	1 2	1 1	1 2	1 1	1 1	2 2	1 1	1 1	1 2	2 2	1 2	1 2	1 1	1 1	1 2	1 1	1 1	1 1	1 2	1 1	1 1	1 1	1 1	1 2	1 1	1 1	1 2	1 1	1 1	1 2	1 1	2 2	1 1	1 1	1 2	2 2	1 2	2 2	1 2	1 2	1 1	1 1	1 1	1 1	1 1	0 0	1 1	1 2	1 1	1 1	1 1	1 1	1 2	1 2	1 2	1 2	1 1	1 1	1 1	1 1	1 1	0 0	1 1	0 0	1 2	1 2	1 2	1 2	1 1	1 1	1 2	2 2	1 2	1 1	1 1	1 1	1 2	1 2	2 2	1 2	2 2	1 2	2 2	1 1	2 2	2 2	0 0	1 2	1 2	1 2	0 0	1 2	1 2	1 1	2 2	1 1	1 2	1 1	1 2	1 2	1 1	1 2	1 2	1 2	0 0	1 1	1 1	1 1	1 1	1 2	1 2	1 1	1 1	1 2	2 2	1 2	1 1	1 2	1 1	1 1	2 2	1 1	1 2	2 2	2 2	1 1	1 2	1 2	2 2	1 2	1 2	1 2	1 1	2 2	1 2	1 2	2 2	1 1	1 2	1 1	1 2	1 1	1 2	1 2	1 1	1 2	1 2	1 1	1 2	1 1	1 1	1 1	1 2	1 1	1 2	1 1	1 2	1 2	1 1	1 2	2 2	1 2	1 1	1 1	1 2	1 1	1 1	1 1	1 2	1 1	1 1	1 2	0 0	1 2	2 2	0 0	1 1	1 2	1 2	1 1	1 1	1 2	1 2	1 1	1 2	1 1	1 2	0 0	1 1	1 1	1 2	0 0	1 1	1 1	0 0	1 1	1 1	1 2	1 2	2 2	1 1	1 1	2 2	1 1	0 0	1 1	1 1	1 2	1 2	1 2	1 1	1 1	1 1	0 0	1 2	1 1	1 2	1 2	1 2	1 2	1 2	1 2	1 2	1 2	2 2	1 1	2 2	1 2	1 2	1 2	1 2	0 0	1 2	1 1	1 1	0 0	1 1	1 2	2 2	1 1	1 2	1 2	1 2	1 2	1 1	1 2	1 2	1 2	1 2	1 1	1 1	1 1	1 1	1 1	1 2	1 1	2 2	1 1	1 1	1 2	1 1	0 0	1 2	1 2	1 1	1 1	1 2	1 1	1 1	1 2	1 1	1 2	1 2	1 1	1 2	2 2	1 2	1 1	1 1	1 1	2 2	1 1	1 1	1 2	1 2	1 1	1 1	0 0	1 1	1 2	1 2	1 1	1 1	2 2	1 2	1 2	1 2	1 1	1 2	1 1	1 1	1 1	1 2	1 1	1 2	1 2	0 0	1 1	1 2	1 1	1 1	1 1	1 2	1 2	1 2	1 2	1 2	1 1	1 1	1 2	1 2	1 2	1 1	1 1	1 1	1 1	2 2	1 2	1 1	1 1	1 2	1 2	1 2	1 1	1 1	1 2	1 2	2 2	1 2	1 2	1 1	1 2	1 1	1 1	1 2	1 1	1 1	0 0	1 2	1 2	2 2	1 2	1 2	1 2	1 2	1 2	1 1	1 1	0 0	1 1	1 1	1 2	2 2	1 2	1 2	1 1	2 2	1 1	1 1	1 2	1 1	1 2	1 1	1 1	1 1	1 1	1 2	1 2	1 1	1 1	1 1	2 2	1 2	1 2	1 2	1 2	1 2	1 2	1 2	1 1	1 1	1 1	1 1	1 2	2 2	1 1	1 1	1 2	1 1	1 1	1 1	1 1	1 1	1 2	1 1	1 2	1 2	2 2	1 2	1 1	1 1	1 2	1 1	1 2	1 1	1 2	1 2	1 2	1 1	1 1	1 2	1 1	1 1	1 1	1 1	1 1	1 2	1 1	1 1	1 1	1 1	1 2	1 1	1 2	1 2	1 2	1 2	1 1	1 2	1 2	1 1	1 1	1 1	2 2	1 1	2 2	0 0	1 1	1 1	1 1	2 2	1 2	1 2	1 1	1 2	1 2	1 2	1 1	1 1	1 2	1 1	1 1	1 2	1 1	1 2	1 1	1 1	1 1	1 1	2 2	1 1	0 0	1 2	1 2	1 2	1 2	1 1	1 2	1 1	1 2	1 1	1 2	1 2	2 2	1 1	2 2	1 1	1 2	2 2	1 1	1 1	0 0	1 2	1 2	1 1	1 2	1 1	1 2	1 1	1 1	1 1	1 2	1 2	1 2	1 1	0 0	1 1	0 0	2 2	1 1	1 2	1 1	1 1	1 1	2 2	1 2	1 2	1 1	1 2	1 2	1 1	1 2	1 2	1 2	1 2	1 1	1 1	1 2	1 2	1 1	1 2	1 2	1 1	1 1	1 2	1 1	1 1	1 2	1 2	1 2	1 1	1 1	1 2	1 2	1 1	1 1	1 2	1 2	1 1	1 1	1 1	1 2	1 2	1 1	1 2	1 2	1 2	1 2	1 1	1 2	1 2	1 2	1 2	1 2	1 1	1 1	1 2	1 2	1 1	2 2	0 0	1 1	0 0	1 2	1 1	1 1	1 2	1 2	0 0	2 2	2 2	1 1	1 1	1 2	1 2	1 1	1 1	1 2	1 2	2 2	1 2	1 1	2 2	1 1	1 1	2 2	1 1	2 2	1 1	2 2	2 2	1 2	1 1	2 2	1 2	1 1	1 2	1 1	1 2	2 2	1 2	1 2	1 2	1 1	2 2	1 1	1 2	1 2	1 2	1 2	1 2	1 1	1 1	1 1	1 1	1 2	1 2	1 2	1 1	1 2	0 0	1 1	1 1	1 2	1 1	1 1	1 1	1 1	1 1	0 0	1 1	1 1	1 1	1 2	1 2	1 2	1 1	1 2	1 1	1 1	2 2	1 1	1 2	2 2	2 2	1 2	1 1	1 1	1 2	1 2	2 2	2 2	1 1	1 1	1 1	1 2	1 1	1 1	1 2	1 1	1 2	1 1	1 2	1 1	1 1	1 1	1 2	1 2	1 2	2 2	1 2	1 2	2 2	1 1	1 1	1 1	1 2	1 2	1 2	1 1	1 1	1 1	2 2	0 0	1 2	1 2	1 1	1 1	2 2	1 2	1 1	1 1	1 1	1 2	1 1	1 2	2 2	1 1	1 2	1 1	1 2	1 1	1 1	1 1	0 0	0 0	1 2	1 1	1 2	1 1	1 1	1 1	1 1	2 2	1 1	1 2	1 2	1 2	1 2	1 2	1 2	1 1	1 2	2 2	1 2	1 1	1 2	1 1	0 0	1 1	1 2	2 2	1 2	1 2	1 1	1 2	1 2	1 1	1 1	1 1	1 1	1 2	1 2	1 2	1 2	1 1	1 1	1 1	1 2	1 1	1 2	1 2	1 1	1 2	1 2	1 2	1 1	1 1	1 2	1 2	2 2	1 2	1 2	1 1	1 2	1 1	1 2	1 2	1 2	1 1	2 2	1 1	1 1	1 2	1 2	1 2	2 2	1 1	1 2	1 1	1 2	1 1	1 1	2 2	1 1	1 2	0 0	1 2	1 2	1 1	1 2	1 2	2 2	1 1	1 2	1 2	1 2	1 2	2 2	1 2	1 1	1 1	1 2	1 1	2 2	1 1	2 2	1 1	1 1	2 2	1 2	1 1	1 2	1 1	1 2	2 2	1 2	0 0	1 1	1 1	1 2	2 2	1 1	1 1	1 2	1 2	1 1	1 1	1 1	1 2	1 1	1 1	1 1	1 2	1 2	1 2	1 1	0 0	1 1	1 1	1 2	1 1	1 2	1 1	1 2	1 1	1 2	1 2	1 1	1 2	1 2	1 2	1 1	2 2	2 2	1 2	1 2	1 2	0 0	2 2	1 2	1 2	0 0	1 1	1 1	1 1	1 1	1 1	1 1	1 1	1 2	1 1	1 2	1 2	1 1	1 1	1 1	1 1	1 1	1 2	1 2	1 1	1 1	0 0	0 0	1 2	1 1	0 0	1 1	1 1	2 2	1 1	1 2	1 2	0 0	1 1	1 2	1 1	1 2	1 2	1 2	0 0	1 2	1 2	1 1	0 0	1 2	1 2	1 1	1 2	1 1	2 2	1 2	1 1	2 2	1 1	1 1	1 1	1 1	1 2	1 2	1 1	1 1	1 2	1 1	1 2	1 1	2 2	1 1	1 1	1 1	1 2	1 1	1 2	1 2	1 1	2 2	1 1	1 2	1 2	1 1	1 2	1 2	1 2	1 1	1 1	1 2	1 1	1 2	1 1	1 1	1 1	1 1	1 2	1 2	2 2	1 1	1 2	1 1	1 2	1 1	1 1	1 2	2 2	1 2	2 2	1 1	1 1	1 1	1 2	1 2	1 2	0 0	1 2	1 1	1 2	1 1	1 1	1 2	1 2	1 1	1 2	2 2	1 2	1 1	1 1	2 2	1 1	2 2	1 1	1 2	1 2	1 1	1 2	2 2	1 2	1 1	1 1	2 2	2 2	1 1	1 1	1 2	1 2	1 2	1 1	1 2	1 1	1 1	1 2	1 2	1 1	1 1	1 2	2 2	0 0	1 1	1 2	1 2	1 1	1 1	1 1	1 1	1 2	1 2	0 0	1 1	1 1	1 2	1 1	1 2	1 2	1 1	1 2	2 2	1 2	1 1	2 2	1 1	1 2	1 2	1 2	1 2	1 1	1 1	1 1	1 2	1 1	1 1	1 2	1 1	1 2	1 1	1 2	1 1	1 1	1 2	1 1	1 1	1 1	1 2	1 2	1 1	1 1	1 1	1 2	1 1	2 2	1 2	1 1	1 1	1 2	0 0	1 2	1 1	0 0	1 1	1 1	2 2	1 1	1 1	1 2	1 1	0 0	1 2	1 2	1 1	1 1	2 2	1 1	1 2	1 2	1 1	2 2	1 2	0 0	2 2	2 2	1 2	1 2	1 1	1 2	2 2	1 1	1 1	0 0	1 2	2 2	1 1	1 2	1 1	1 2	1 2	1 2	1 1	1 1	1 2	1 2	1 2	1 2	1 2	2 2	2 2	1 2	1 1	1 2	1 1	1 1	2 2	1 2	1 1	1 1	1 1	1 2	0 0	1 1	1 1	1 1	1 2	1 2	1 2	1 2	1 2	1 1	1 2	1 1	1 1	1 1	1 1	1 2	1 1	1 2	1 1	1 2	1 2	1 1	1 1	1 2	1 2	1 1	1 1	1 2	0 0	1 2	1 2	1 1	2 2	2 2	1 2	1 2	1 2	1 1	1 2	1 2	1 1	1 2	1 2	1 1	1 1	1 2	1 1	0 0	1 1	1 2	2 2	2 2	1 1	1 1	1 2	2 2	1 1	1 1	1 1	1 1	1 2	2 2	1 2	1 2	2 2	2 2	1 2	1 1	0 0	1 2	0 0	1 1	1 1	1 2	1 1	2 2	1 1	1 1	2 2	1 2	2 2	1 1	1 2	1 1	2 2	1 2	1 1	1 1	1 1	1 2	0 0	1 2	1 1	1 1	1 2	1 1	1 1	1 1	1 1	1 1	1 1	1 1	1 2	1 1	1 2	1 2	1 2	1 2	1 2	1 2	1 2	1 1	1 2	1 2	1 1	1 2	1 2	1 2	2 2	1 2	0 0	1 1	1 1	1 1	1 2	1 2	1 2	0 0	1 1	1 1	1 2	1 2	1 1	2 2	1 2	1 1	1 2	2 2	1 1	1 2	1 2	1 2	1 2	1 2	1 1	1 2	1 1	1 2	1 1	1 1	1 1	1 2	1 2	1 2	2 2	1 1	1 1	1 1	1 2	1 2	1 2	1 1	1 1	1 1	1 2	2 2	1 2	1 1	1 2	1 1	1 2	1 1	1 1	1 2	1 1	1 2	1 1	1 1	1 2	1 1	1 1	1 2	1 2	0 0	1 1	1 2	1 2	1 1	1 2	1 2	2 2	1 2	1 1	1 1	1 2	1 1	1 1	1 2	1 2	0 0	1 1	0 0	1 1	1 1	1 2	1 1	0 0	1 1	1 2	1 2	1 1	1 1	1 2	1 2	1 1	1 2	2 2	1 1	1 1	1 2	1 1	1 2	1 1	2 2	1 1	2 2	1 2	1 1	1 2	1 2	1 1	1 2	1 2	1 2	1 1	1 1	1 1	1 1	1 2	1 2	1 1	1 1	1 2	1 1	1 1	1 1	1 1	2 2	0 0	2 2	1 2	1 1	1 1	1 1	2 2	1 2	1 2	1 2	1 2	1 2	2 2	1 1	1 1	1 1	1 2	1 1	1 2	1 1	1 2	1 1	1 2	1 2	1 1	0 0	1 1	1 1	1 2	1 1	1 1	1 2	1 2	0 0	1 2	1 2	1 1	1 1	2 2	1 1	1 2	1 2	1 2	1 1	1 2	1 2	1 2	2 2	1 1	1 1	2 2	1 2	1 1	2 2	1 2	1 2	1 1	1 2	1 2	1 1	1 1	1 2	1 2	1 2	2 2	1 1	2 2	1 2	1 2	1 1	1 1	0 0	1 2	1 2	1 2	1 1	1 1	2 2	2 2	1 1	1 1	1 2	1 2	1 2	0 0	2 2	0 0	1 1	1 2	1 1	2 2	1 1	2 2	1 1	1 2	1 2	1 1	1 2	1 1	1 1	1 2	1 2	2 2	1 1	2 2	1 1	1 2	1 1	1 1	1 1	1 2	1 1	1 2	1 1	2 2	0 0	1 1	1 2	2 2	1 1	1 1	0 0	1 1	1 1	1 2	2 2	1 1	1 2	2 2	1 2	2 2	1 2	1 2	1 1	1 1	1 1	1 2	2 2	1 1	1 2	1 1	1 1	1 1	1 1	1 1	1 1	1 2	1 1	1 2	2 2	1 2	1 1	1 2	1 2	1 1	1 1	1 1	1 2	0 0	1 1	1 2	1 1	1 1	1 2	1 2	1 1	1 2	2 2	1 1	1 2	1 2	2 2	1 1	1 2	2 2	1 2	1 1	1 1	1 2	1 2	1 1	1 1	1 1	1 2	1 1	1 1	1 2	1 1	1 2	1 2	1 2	1 1	1 1	1 1	1 1	1 2	1 2	1 1	1 2	0 0	1 1	1 2	1 1	2 2	1 2	2 2	1 1	1 1	1 1	1 1	1 1	1 1	1 1	2 2	2 2	1 1	1 1	1 2	1 1	1 1	1 1	1 2	2 2	0 0	1 1	2 2	1 1	1 2	1 2	1 1	1 2	1 2	2 2	1 1	1 2	1 2	1 2	1 1	1 2	1 2	1 1	1 2	2 2	1 2	1 2	1 1	1 1	1 2	1 2	1 1	2 2	1 2	1 2	1 1	1 1	1 1	1 1	1 2	1 2	1 2	1 1	1 1	1 2	1 2	1 2	1 2	1 1	1 1	2 2	1 2	1 1	1 1	1 2	1 1	1 1	1 1	1 2	1 2	1 1	2 2	0 0	1 2	1 2	2 2	1 2	2 2	1 1	1 2	1 2	1 2	1 2	1 1	1 2	1 1	1 1	1 1	1 1	1 1	2 2	1 2	1 2	1 2	1 1	1 1	1 2	1 2	1 1	1 2	1 2	1 1	1 2	0 0	1 2	1 2	2 2	1 2	1 2	1 2	1 2	1 1	1 2	1 1	1 1	1 2	1 1	1 2	1 2	1 1	1 1	1 1	1 1	0 0	2 2	1 1	1 2	1 1	1 2	1 2	1 1	1 1	1 1	1 2	1 1	1 2	1 2	1 2	1 1	1 1	1 2	1 1	1 2	1 2	2 2	1 2	1 1	1 2	1 1	1 1	1 2	1 1	1 2	1 2	1 1	1 2	1 2	1 2	1 1	1 2	0 0	1 1	1 2	1 2	1 1	1 2	1 2	1 1	1 2	1 1	1 2	1 1	1 2	1 2	1 1	1 1	1 2	1 1	2 2	2 2	1 1	1 1	1 1	1 2	2 2	1 2	1 2	1 1	2 2	1 2	1 1	1 1	1 1	1 2	1 2	1 2	1 2	1 1	1 1	1 1	1 1	2 2	1 1	1 1	1 2	1 1	1 1	1 2	1 2	1 2	2 2	1 2	1 2	2 2	1 2	1 2	1 1	1 1	2 2	1 2	1 1	2 2	2 2	1 2	1 2	1 1	2 2	2 2	2 2	1 1	1 1	1 2	1 2	0 0	2 2	1 1	1 2	1 1	1 1	0 0	1 2	1 2	1 2	1 1	1 2	0 0	1 2	1 1	1 1	1 2	2 2	1 1	1 2	1 2	1 2	1 1	1 1	1 1	1 1	1 1	0 0	1 1	1 2	0 0	1 2	0 0	1 1	1 1	1 2	1 2	1 2	1 2	1 1	1 2	1 1	1 1	1 1	1 1	1 1	1 2	1 2	1 1	1 1	1 2	1 2	1 1	1 1	1 2	1 2	1 1	1 2	1 2	1 2	2 2	1 2	1 1	2 2	2 2	1 1	1 2	1 2	0 0	1 2	1 2	1 1	2 2	2 2	1 2	1 2	1 1	1 2	1 1	2 2	1 2	0 0	1 1	1 2	1 2	1 2	1 1	1 1	1 1	2 2	1 2	1 1	1 1	1 2	1 2	1 1	2 2	1 2	1 2	1 2	1 2	1 1	1 2	1 1	2 2	1 1	1 1	2 2	1 2	1 2	1 2	1 2	2 2	1 1	1 1	1 2	0 0	1 1	1 1	1 1	1 2	1 1	1 1	1 1	1 1	1 1	1 2	1 2	1 1	1 2	0 0	1 2	1 1	1 1	2 2	1 2	1 2	1 2	1 2	1 1	1 1	1 2	1 2	1 1	1 1	1 2	1 2	1 1	1 1	1 1	1 2	1 1	1 1	1 1	1 2	1 2	1 1	1 1	1 2	1 1	1 2	1 1	1 1	1 1	1 1	1 1	1 1	1 1	1 1	1 1	1 2	1 1	2 2	1 2	1 2	1 2	1 1	1 1	1 1	1 1	1 2	1 1	1 2	2 2	1 2	1 1	1 1	2 2	0 0	1 1	1 2	1 1	2 2	1 1	1 2	1 1	1 2	1 1	1 1	1 1	1 2	1 1	1 2	1 1	1 2	1 2	1 1	1 2	1 2	1 1	1 1	1 2	2 2	1 1	2 2	1 1	1 1	1 1	1 1	2 2	1 1	1 1	1 1	1 2	0 0
[truncated: 5,939,505 more chars]
